# Supplementary material for: Plasmodium pseudo-Tyrosine Kinase-like binds PP1 and SERA5 and is exported to host erythrocytes
Source: PubMed Central journal article supplement (PMC6544628; doi:10.1038/s41598-019-44542-3), 2019-05-31
Supplement: 41598_2019_44542_MOESM1_ESM.pdf [file 41598_2019_44542_MOESM1_ESM.pdf]

## Supplementary information

### ***Plasmodium* pseudo-Tyrosine Kinase-like binds PP1 and SERA5 and is exported to host erythrocytes**

Bénédicte Gnanon<sup>1</sup>, Aline Fréville<sup>1</sup>, Katia Cailliau<sup>2</sup>, Catherine Leroy<sup>3</sup>, Caroline De Witte<sup>1</sup>, David Tulasne<sup>3</sup>, Alain Martoriarti<sup>2</sup>, Vincent Jung<sup>4</sup>, Ida Chiara Guerrero<sup>4</sup>, Sabrina Marion<sup>1</sup>, Jamal Khalife<sup>1</sup>, Christine Pierrot<sup>1\*</sup>

<sup>1</sup> Center for Infection and Immunity of Lille, Inserm U1019-CNRS UMR 8204, Université de Lille, Institut Pasteur de Lille, 1 Rue du Professeur Calmette, F-59000 Lille, France

<sup>2</sup> Université de Lille, CNRS, INRA, UMR 8576-UGSF - Unité de Glycobiologie Structurale et Fonctionnelle, F-59000 Lille, France

<sup>3</sup> University of Lille, CNRS, Institut Pasteur de Lille, UMR 8161 - M3T - Mechanisms of Tumorigenesis and Target Therapies, F-59000 Lille, France.

<sup>4</sup> Proteomics platform 3P5-Necker, Université Paris Descartes - Structure Fédérative de Recherche Necker, INSERM US24/CNRS UMS3633, 14 Rue Maria Helena Vieira Da Silva, Paris 75014, France.

### Table of Contents

|                                                                                                      |    |
|------------------------------------------------------------------------------------------------------|----|
| Supplementary Table S1. Primer table. ....                                                           | 2  |
| Supplementary Figure S1. PF3D7_1106800 transcript sequencing data. ....                              | 4  |
| Supplementary Table S2. PF3D7_1106800 kinase domain in silico prediction. ....                       | 5  |
| Supplementary Figure S2. PF3D7_1106800 kinase domain phylogenies. ....                               | 6  |
| Supplementary Figure S3. The <i>Pfp</i> TKL BTK-like domain folds like the BTK N-terminal lobe. .... | 7  |
| Supplementary Figure S4. <i>P. falciparum</i> MORN motif alignment. ....                             | 8  |
| Supplementary Figure S5. <i>Pfp</i> TKL SAM domain phylogenetics. ....                               | 9  |
| Supplementary Table S3. <i>Pfp</i> TKL regions produced as recombinant proteins. ....                | 10 |
| Supplementary Figure S6. Recombinant protein purification. ....                                      | 10 |
| Supplementary Table S4. Raw data – Kinase Glo assays. ....                                           | 11 |
| Supplementary Table S5. Y2H screening results. ....                                                  | 12 |
| Supplementary Figure S7 - Reverse genetics construct and genotyping data. ....                       | 13 |
| Supplementary Figure S8 – Infected erythrocyte sequential lysis protocol. ....                       | 15 |
| Supplementary Figure S9. <i>Xenopus laevis</i> oocyte experiments. ....                              | 16 |
| Uncropped blots. ....                                                                                | 17 |
| NanoLC/MS protein identification and quantification (mass spectrometry). ....                        | 21 |
| Supporting Information 1 – Synthetic gene 1 – pTKL_SAM-GST. ....                                     | 22 |
| Supporting Information 2 – Synthetic gene 2 – pTKL_KD_WT. ....                                       | 22 |
| Supporting Information 3 – MAFFT Alignment of <i>Pfp</i> TKL orthologs BTK-like domains. ....        | 23 |
| Supporting Information 4 - MAFFT Alignment Kinase Domains (phylogenetics analysis). ....             | 24 |
| Supporting Information 5 – MAFFT Alignment – <i>Pfp</i> TKL orthologs and homologs. ....             | 42 |
| Supporting Information 6 – MAFFT Alignment SAM and SAM-like domains. ....                            | 62 |
| Supporting Information 7 – EMBOSS Needle alignment <i>Pfp</i> TKL vs <i>Pbp</i> TKL. ....            | 65 |
| Supporting Information 8 – Sequencing data – pTKL_RVxF1. ....                                        | 68 |
| Supporting Information 9 – Sequencing data pTKL_SAM&RVxF1. ....                                      | 71 |
| Supporting Information 10 – Sequencing data pTKL_KD_WT and mutants. ....                             | 74 |
| Supporting Information 11 – Sequencing data <i>Pf</i> SERA5 recombinant protein. ....                | 79 |
| References. ....                                                                                     | 84 |

**Supplementary Table S1. Primer table.**

| Primer | 5' to 3' sequence                         | Use                                                                                                                                                     |
|--------|-------------------------------------------|---------------------------------------------------------------------------------------------------------------------------------------------------------|
| F1     | ATGGGCAACACCCTTGATAG                      | Amplification of PF3D7_1106800 0-1100 bp transcript portion                                                                                             |
| R2     | TCTACAAGTTATGGCATATAAT                    |                                                                                                                                                         |
| F3     | ATTGCTTATGGACATGCAATCA                    | Amplification of PF3D7_1106800 1040-1600 bp transcript portion                                                                                          |
| R4     | AAAATATGCTATCACTACATATAACC                |                                                                                                                                                         |
| F5     | GGTATATGTAGTGATAGCATATTTT                 | Amplification of PF3D7_1106800 1600-2280 bp transcript portion                                                                                          |
| R6     | TCATGTATATATTGTTGCAATACT                  |                                                                                                                                                         |
| F7     | ATAGTATATCTTCAACATGTTCTTC                 | Amplification of PF3D7_1106800 2150-2760 bp transcript portion                                                                                          |
| R8     | ATGTAGATATGAAAAGAGACTTA                   |                                                                                                                                                         |
| F9     | ATGGGAGTATCTATTCATTATCC                   | Amplification of PF3D7_1106800 2700-3300 bp transcript portion                                                                                          |
| R10    | TCGTATGCTCCACATAATACAT                    |                                                                                                                                                         |
| F11    | CAAGTACACTTTCTGATCATAG                    | Amplification of PF3D7_1106800 3180-4500 bp transcript portion                                                                                          |
| R12    | TTATGTTCCATCCATAAATGAAAT                  |                                                                                                                                                         |
| F13    | GCCAGGATCCGAATTCTCAATAACTTAATACAAATAGAAG  | Cloning of cDNA encoding PF3D7_1106800 <sub>371-531</sub> protein in pETduET to express <i>PfpTKL_RVxF1</i>                                             |
| R14    | AAGCATTATGCGGCCGCTATGCTATCACTACATATAACC   |                                                                                                                                                         |
| F15    | CATGGAGGCCGAATTCGACAAAATGAATATATCCCTTCAT  | Cloning of cDNA encoding PF3D7_1106800 <sub>255-531</sub> protein (SAM+RVxF1) in pGBKT7 to express the Y2H bait in Y2Hg                                 |
| R16    | GCAGGTCGACGGATCCTATGCTATCACTACATATAACC    |                                                                                                                                                         |
| F17    | ATGGCATATAATAAATAATTCAATAACTTAATA         | Targeted mutagenesis primers used to insert a STOP codon in SAM+RVxF1_pGBKT7 construct                                                                  |
| R18    | TATTAAGTTATTGAATTTTATTATATGCCAT           |                                                                                                                                                         |
| F20    | ACCACAGCCAGGATCCGGATACAGAAGATACTAATATCGAA | Cloning of cDNA encoding protein <i>PfSERA5</i> <sub>144-363</sub> in pETduET-1                                                                         |
| R21    | CGCCGAGCTCGAATTCTACTAAAAGAGCACATTGAAAGCA  |                                                                                                                                                         |
| F22    | GGAGAAAATGAGCCCCATTGATCTG                 | Targeted mutagenesis primers used in N1272D mutation (to generate pTKL_KD_ND mutant)                                                                    |
| R23    | CAGATCAATGGGGCTCATTTTCTCC                 |                                                                                                                                                         |
| F24    | CGAATCTCTGAATGCCAAAATTAGCGGTTTCGAAATCAGC  | Targeted mutagenesis primers used in <sup>1290</sup> DFG <sup>1292</sup> - <sup>1290</sup> GFE <sup>1292</sup> mutation (to generate pTKL_KD_DG mutant) |
| R25    | GCTGATTTTCGAAACCGCTAATTTTGGCATTAGAGATTTCG |                                                                                                                                                         |
| F26    | GATCAAACGGAAACGCATAATGGCGTCTTCTACCTGA     | Targeted mutagenesis primers used to mutate RVxF2 motif ( <sup>1216</sup> KRKVLF <sup>1221</sup> into <sup>1216</sup> KRIMAS <sup>1221</sup> )          |
| R27    | TCAGGTAGGAAGACGCCATTATGCGTTTCCGTTTGATC    |                                                                                                                                                         |

|                  |                                               |                                                                                                                                                 |
|------------------|-----------------------------------------------|-------------------------------------------------------------------------------------------------------------------------------------------------|
| F28              | ACCGCGGTGGCGGCCGCCGGATTTTGAATTAAGAAATAG       | Cloning of the last 1126 bp of PBANKA_0940100 gene (STOP codon excluded) from <i>P. berghei</i> gDNA in pG362                                   |
| R29              | TCATTCTAGTCTCGAGTCCATCCATAAAGACATTAAGC        |                                                                                                                                                 |
| F30              | GCGTATCTAACTATTCCACTTTA                       | Primers used to genotype the <i>PbpTKL</i> -AID-HA cloned parasites ( <a href="#">Supplementary Fig. S5</a> )                                   |
| GU533            | GATTAAGTTGGGTAACGCC                           |                                                                                                                                                 |
| Ext              | CCGTCTCTGAGAACCCTCT                           |                                                                                                                                                 |
| R <sub>3</sub> ' | GGCGGCCGCTCTAGATTCATGATTAACAGTGTTAATTAACA     |                                                                                                                                                 |
| F31              | GTAAGGCTAAATTGGATATCAATCAAATAT                | Silent targeted mutagenesis primers used to add a BsaBI restriction site within pG362 <i>PbpTKL</i> insert                                      |
| R32              | ATATTTGATTGATATCCAATTTAGCCTTAC                |                                                                                                                                                 |
| GT               | TGCCAAACTGCTATTGATGT                          | Primers used to genotype the <i>P. berghei</i> parasites transfected with PbGEM-342364 from Plasmogem ( <a href="#">Supplementary Fig. S5</a> ) |
| GW1              | CATACTAGCCATTTTATGTG                          |                                                                                                                                                 |
| GW2              | CTTTGGTGACAGATACTAC                           |                                                                                                                                                 |
| F <sub>5</sub> ' | CGTGCCCGATTATGCCGGCATGGGAAATATAAATTCTATTCAAAC |                                                                                                                                                 |
| R <sub>5</sub> ' | CCAAAATTTTAACGCTAGCCGCTTAAAGCCCATTTTCATAGG    |                                                                                                                                                 |

## Supplementary Figure S1. PF3D7\_1106800 transcript sequencing data.

**a**

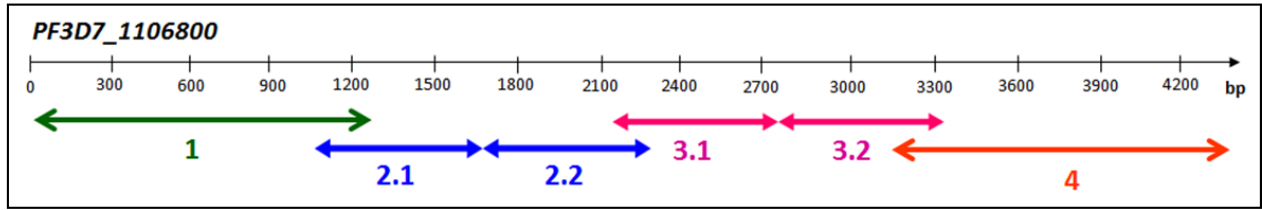

**b**

| PlasmoDB vs our data<br>Gene region N° | At the gDNA level     | At the cDNA                                   | At the protein level                        |
|----------------------------------------|-----------------------|-----------------------------------------------|---------------------------------------------|
| <b>1 (0-1100 bp)</b>                   | N/A                   | <b>T531A</b>                                  | <b>K177N</b>                                |
| <b>2.1 (1040-1600 bp)</b>              | N/A                   | <b>G1218T<br/>A1220T</b>                      | <b>K406N<br/>K407I</b>                      |
| <b>2.2 (1600-2280 bp)</b>              | One 24 nucleotide gap | Various 24 (major), 96 or 138 nucleotide gaps | Various 8 (major), 32 or 46 amino acid gaps |
| <b>3.1 (2150-2760 bp)</b>              | N/A                   | -                                             | -                                           |
| <b>3.2 (2700-3300 bp)</b>              | N/A                   | -                                             | -                                           |
| <b>4 (3180-4500 bp)</b>                | One 30 nucleotide gap | 30 nucleotide gap                             | 10 amino acid gap                           |

**c**

```

PfTKL5_Pdb  MNTLDSMRF KNFVTVADYK VIGLAKNNE HGGIIGIILYN SGEFFYGSFI NGRKEGKGV IDKNLTRYIN TWVDNVFVFK VVVFVFNHR VYFFYFVNM ICKCIFVFNH INNESHHN NIYNYVNNH YNNNSCDBE KRKYPVGVY FEELDSYIY STRHMKNNK LPWNNKEYN IFSSLSYSB DSEANILLDI
PfTKL5_seq  MNTLDSMRF KNFVTVADYK VIGLAKNNE HGGIIGIILYN SGEFFYGSFI NGRKEGKGV IDKNLTRYIN TWVDNVFVFK VVVFVFNHR VYFFYFVNM ICKCIFVFNH INNESHHN NIYNYVNNH YNNNSCDBE KRKYPVGVY FEELDSYIY STRHMKNNK LPWNNKEYN IFSSLSYSB DSEANILLDI
Clustal Co  .....
```

(a) Scheme of the overlapping regions in the PF3D7\_1106800 transcript which were amplified by RT-PCR using total Pf3D7 RNA as the template before sequencing.

(b) Comparison of data collected by overlapping RT-PCR using total Pf3D7 RNA (or total Pf3D7 genomic DNA) and data from PlasmoDB. Two independent RT-PCRs were performed and 6–12 clones were sequenced for each transcript region.

(c) Pairwise sequence alignment of the PF3D7\_1106800 PlasmoDB sequence (PfTKL5\_Pdb) and the translated sequenced transcript (PfTKL5\_seq') using [Tcoffee](#). The mutations and gaps highlighted in Fig. 2 are shaded respectively in red and blue.

**Supplementary Table S2. PF3D7\_1106800 kinase domain in silico prediction.**

| Prediction Software | Kinase domain delineation | Prediction Confidence                                                                |
|---------------------|---------------------------|--------------------------------------------------------------------------------------|
| SMART               | 1150–1463                 | $9.51 \times 10^{-8}$                                                                |
| Interpro            | 1080–1465                 | -                                                                                    |
| CATH                | 1237–1464                 | $1.2 \times 10^{-29}$                                                                |
| ScanProsite         | 1080–1465                 | score = 18.238                                                                       |
| Phyre2              | 1144–1483                 | Template = IKK1<br>Prediction confidence = 100%                                      |
| RAPTOR-X            | 1136–1483                 | Template = TYK2 from the JAK family ;<br>Prediction p-value = $4.56 \times 10^{-11}$ |

**Summary of primary (SMART<sup>1</sup>, Interpro<sup>2</sup>, CATH<sup>3</sup> and ScanProsite<sup>4</sup>) and tertiary (Phyre2<sup>5</sup> RAPTORX<sup>6</sup>) structure delineations of the PF3D7\_1106800 kinase domain:** Compiling these results leads to a final delineation for the kinase domain: residues 1080–1483.

Supplementary Figure S2. PF3D7\_1106800 kinase domain phylogenies.

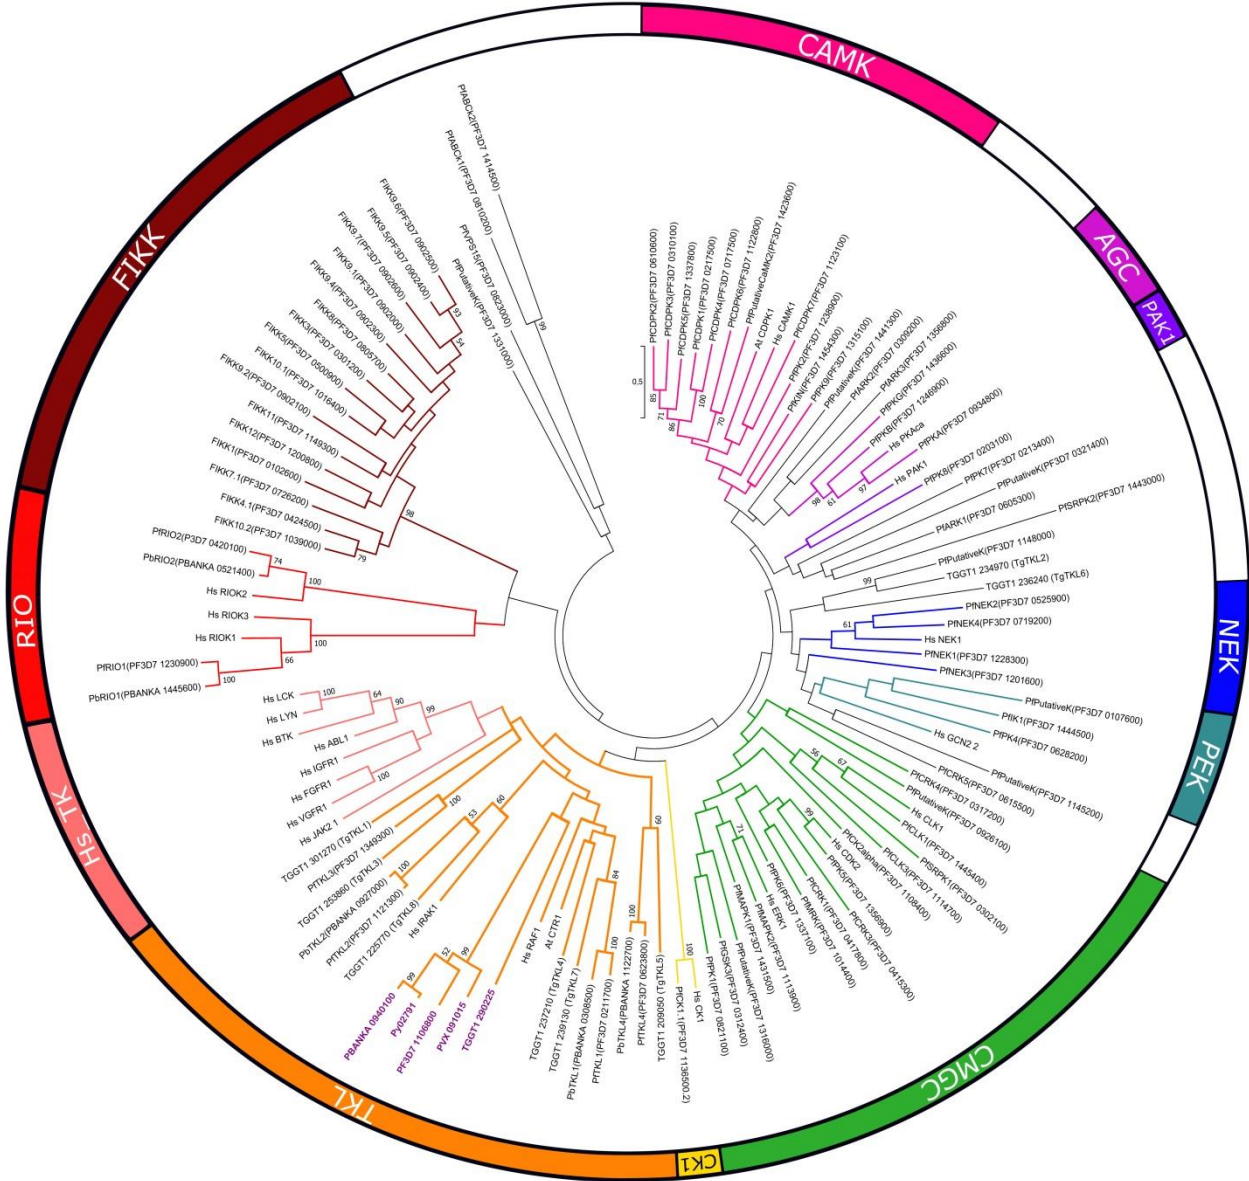

**PF3D7\_1106800 is a tyrosine kinase-like protein.** The figure displays the classification of *Plasmodium falciparum* kinases with various reference kinases from one each of the categories Alveolata, Opisthokonta (Metazoa), and Archeplastida (Plantae). Species names can be found from the sequence IDs: Alveolata: Pf= *Plasmodium falciparum*, Pb= *P. berghei*, PVX= *P. vivax*, Py=*P. yoelii*, TGGT1= *Toxoplasma gondii* GT1; Metazoa: Hs= *Homo sapiens*; Plantae: At= *Arabidopsis thaliana*. The 117 kinase domain amino acid sequences included in this classification were retrieved from [Uniprot](#)<sup>7</sup> and aligned using [MAFFT](#)<sup>8</sup>. The phylogenetic analysis was performed with MEGA6<sup>9-11</sup>. Less than 30% alignment gaps, missing data, and ambiguous bases were allowed at any position (there were a total of 229 positions in the final dataset). The tree is drawn to scale, with branch lengths measured in the number of substitutions per site. Graphical presentation and editing were achieved using MEGA6<sup>9-11</sup> and [Inkscape 0.92](#).

**Supplementary Figure S3. The *Pfp*TKL BTK-like domain folds like the BTK N-terminal lobe.**

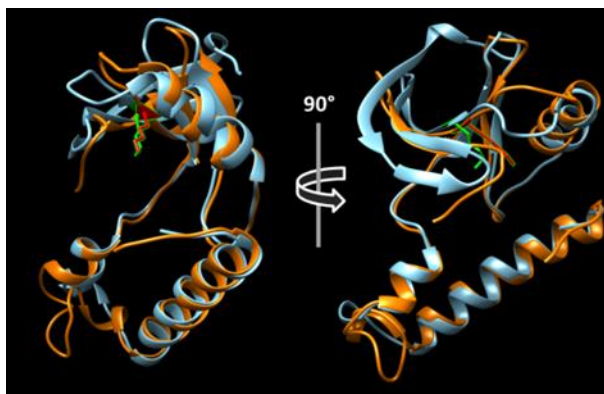

Tertiary structure comparison between *Pfp*TKL BTK-like domain shaded in orange (tertiary structure was predicted with [Phyre 2](#)<sup>5</sup>, 120 residues (98%) modeled at >90% accuracy) and BTK N-terminal lobe shaded in gray (PDB ID: 4RFZ, residues 396–519). The ATP-binding lysine of BTK is shaded in green and the one conserved in the *Pfp*TKL BTK-like domain is shaded in red. The shading and structure comparison were achieved using the Color and MatchMaker tools of Chimera v1.10.1<sup>12</sup> respectively.

## Supplementary Figure S4. *P. falciparum* MORN motif alignment

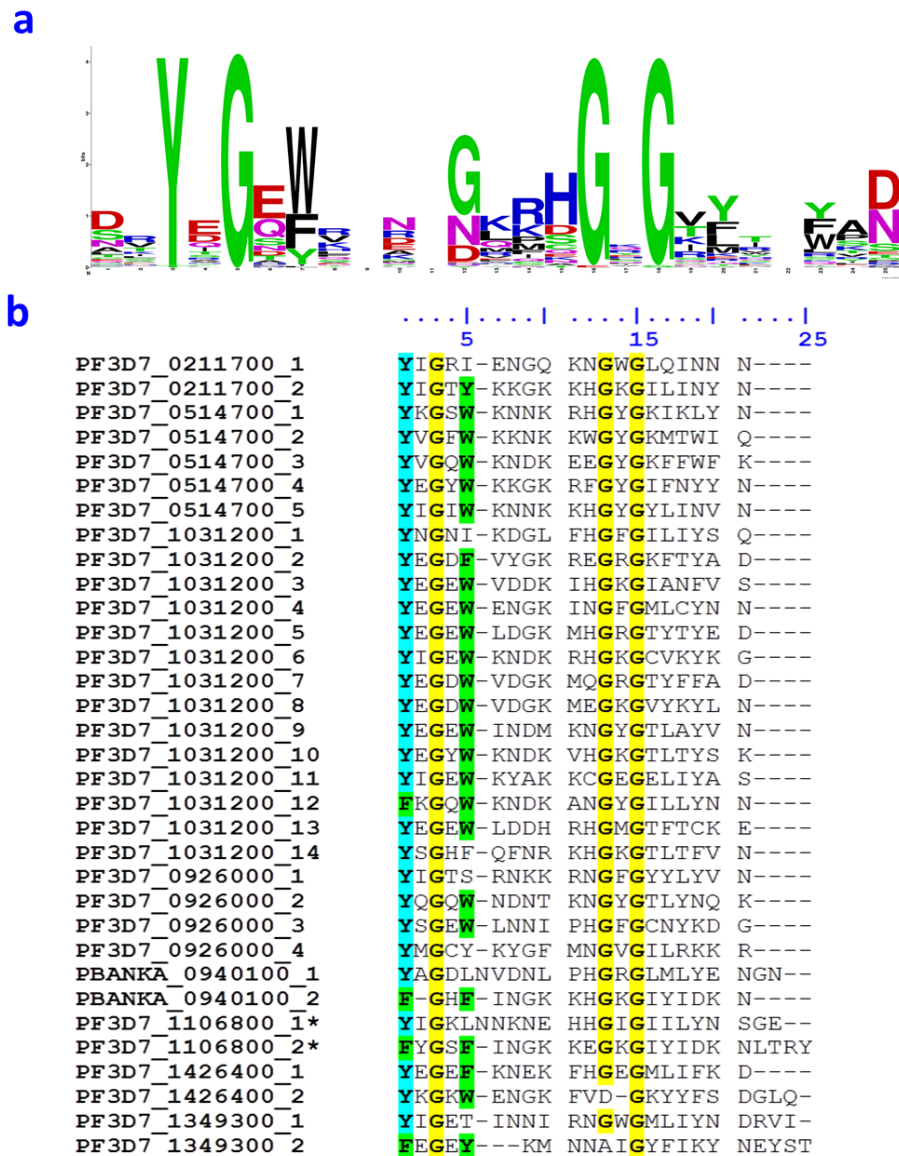

(a) MORN domain sequence pattern. This sequence logo was prepared using MORN domain family sequences from [SMART](#)<sup>1</sup>. The logo was made with [WebLogo](#)<sup>13</sup>

(b) Alignment of various MORN domains belonging to different *Plasmodium falciparum* 3D7 proteins (MORN1 = PF3D7\_1031200, MORN repeat proteins = PF3D7\_0514700, PF3D7\_1426400, tyrosine kinase-like proteins: *PfTKL1* = PF3D7\_0211700, *PfTKL3* = PF3D7\_1349300). Proteins are identified with their [PlasmoDB](#)<sup>14</sup> identifier and each MORN domain position in the protein (from N-terminus to C-terminus) is numbered from 1 to 14. MORN domains were predicted using [SMART](#)<sup>1</sup> and aligned using [MAFFT](#)<sup>8</sup>. A 80% threshold shading was applied to the alignment using BioEdit v7.2.5. This alignment shows that most *Plasmodium falciparum* MORN domains follow the sequence signature shown in panel (a).



## Supplementary Figure S5. PfpTKL SAM domain phylogenetics

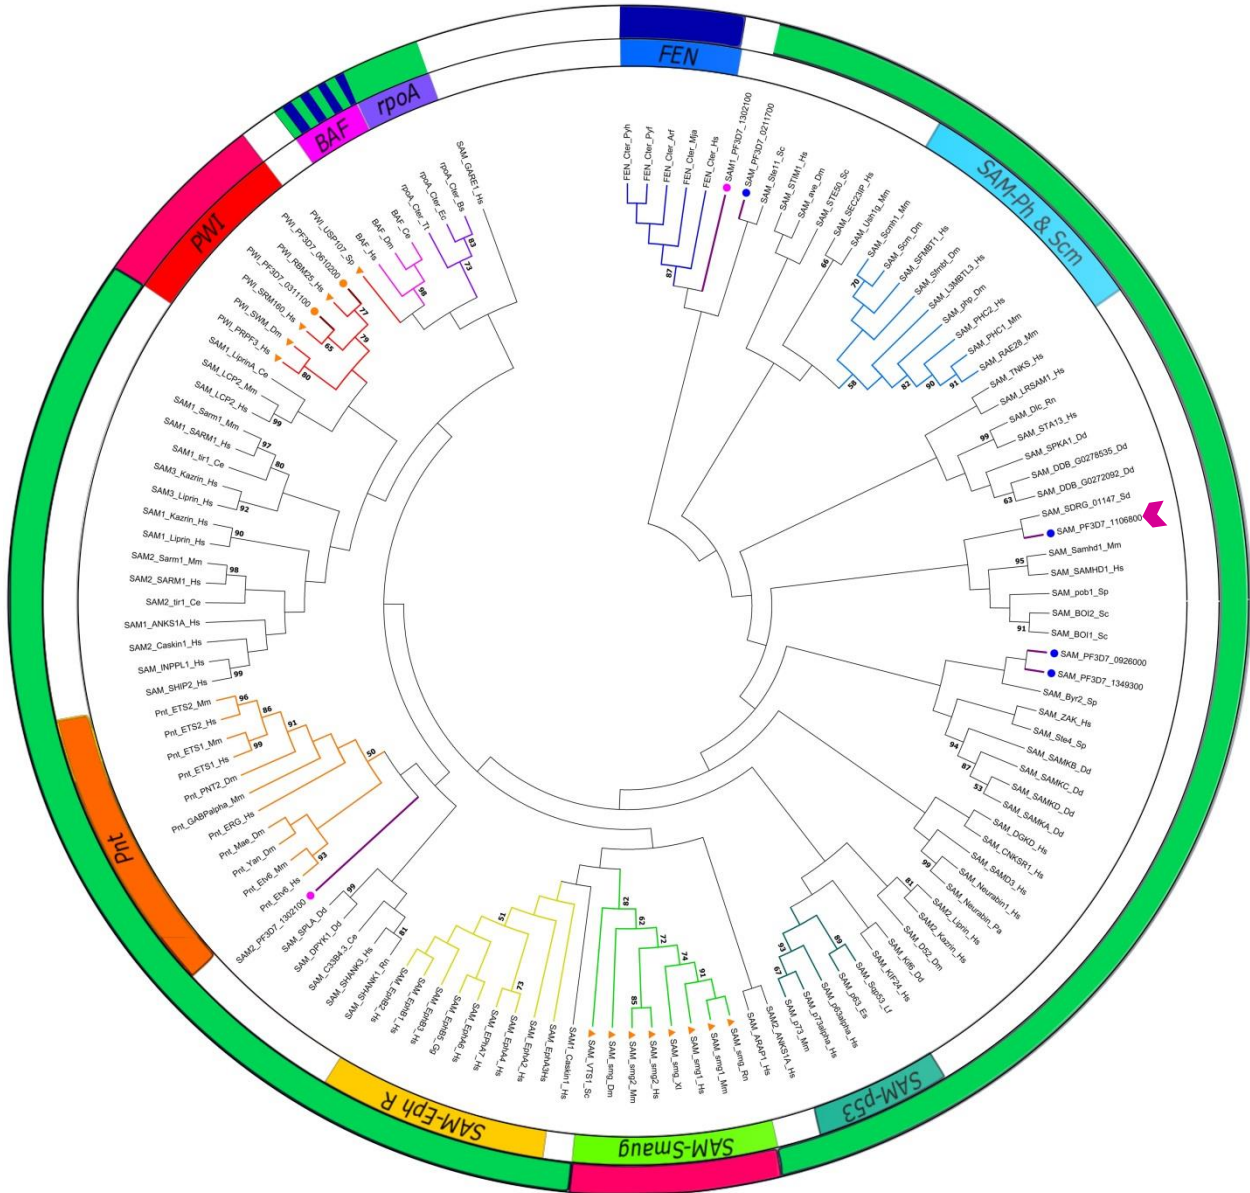

### Caption :

- = interaction with DNA
- = interaction with RNA
- = interaction with proteins

*PfpTKL* SAM clusters with SAMs involved in protein–protein interactions. The figure shows a classification of SAMs and SAM-like sequences across the tree of life. Species names can be found from sequence IDs as follows: Archae: Arf = *Archeoglobus fulgidus*, Mja = *Methanocaldococcus jannaschii*, Pyh= *Pyrococcus horikoshii*, Pyf = *P. furiosus*; Bacteria: Bs= *Bacillus subtilis*, Ec= *Escherichia coli*, Tt= *Thermus thermophilus*; Amoebozoa: Dd= *Dictyostelium discoideum*, Metazoa: Ce= *Caenorhabditis elegans*, Dm= *Drosophila melanogaster*, Es= *Euprymna scolopus* (Hawaii bobtail squid), Hs= *Homo sapiens*, Lf= *Loligo forbesi* (Northern European squid), Mm= *Mus musculus*, Pa= *Papio anubis*, Rn= *Rattus norvegicus*, Xl= *Xenopus laevis*; Fungi: Sc= *Saccharomyces cerevisiae*, Sp= *Schizosaccharomyces pombe*; Stramenopile: Sd= *Saprolegnia diclina*; Alveolata: *Plasmodium falciparum* 3D7 proteins are identified with their PlasmoDB ID: PF3D7\_XXXXXX.

### Supplementary Table S3. *Pfp*TKL regions produced as recombinant proteins.

| Recombinant protein name | <i>Pfp</i> TKL protein region (AA) | Tags                                | Remarks                                                 |
|--------------------------|------------------------------------|-------------------------------------|---------------------------------------------------------|
| pTKL_RVxF1               | 371-531                            | His <sub>6</sub> (3') or GST (5')   | -                                                       |
| pTKL_SAM                 | 279-383                            | GST (5')                            | Synthetic gene 1                                        |
| pTKL_KD_WT               | 1076-1435                          | MaBP (5') and His <sub>6</sub> (3') | Synthetic gene 2                                        |
| pTKL_KD_ND               | 1076-1435                          | MaBP (5') and His <sub>6</sub> (3') | Obtained by targeted mutagenesis of the pTKL_KD_WT gene |
| pTKL_KD_DG               | 1076-1435                          | MaBP (5') and His <sub>6</sub> (3') |                                                         |
| pTKL_KD_KRIMAS           | 1076-1435                          | MaBP (5') and His <sub>6</sub> (3') |                                                         |

Chart showing the characteristics of the recombinant proteins named in the main text. Synthetic gene sequences are available in annex [Supporting Information](#).

His<sub>6</sub> = 6-histidine tag, GST = glutathione S-transferase, MaBP = maltose binding protein.

### Supplementary Figure S6. Recombinant protein purification.

#### GST-tagged proteins:

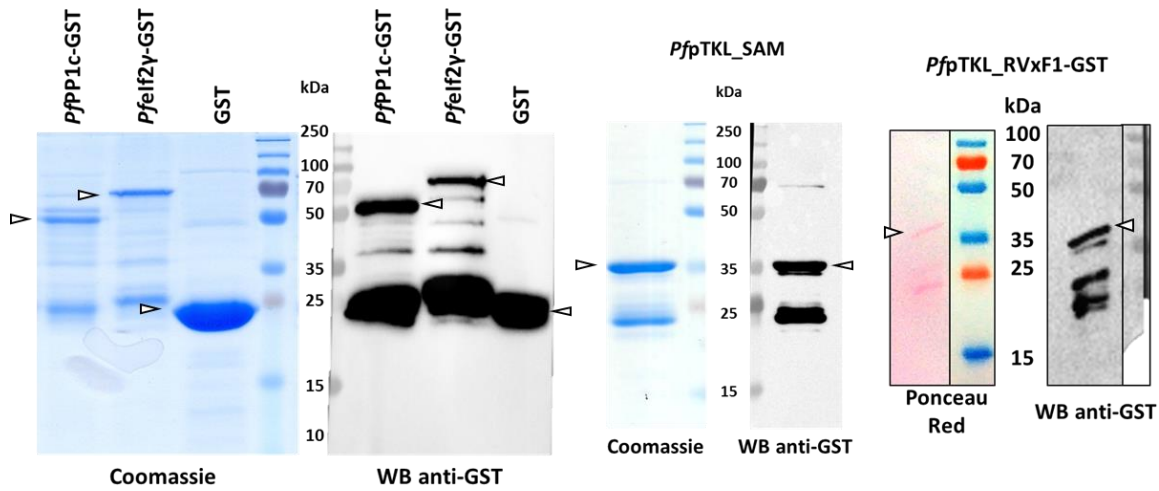

#### His<sub>6</sub>-tagged proteins:

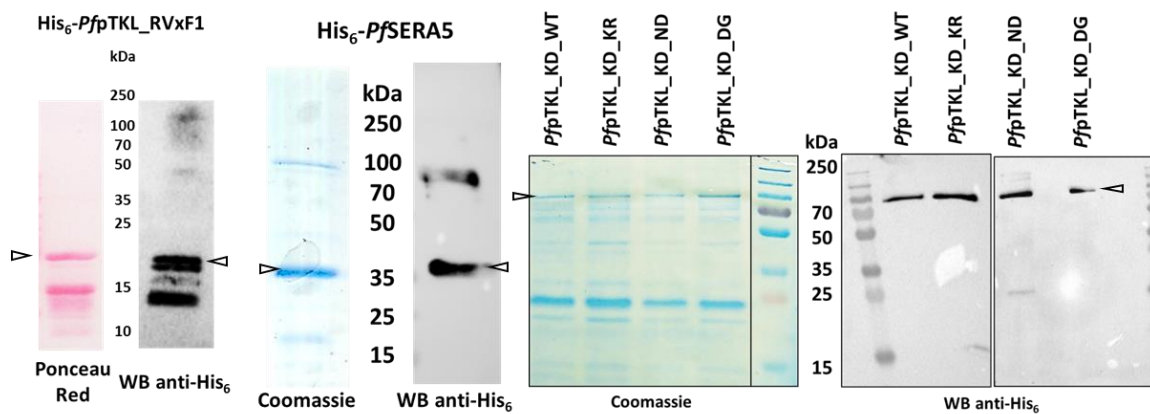

SDS-PAGE followed by western blot analysis was performed to attest for recombinant protein purity. Protein names are displayed above the gels and blots. Gel and western blot types are indicated below.

**Supplementary Table S4. Raw data (divided by 1000) – Kinase Glo assays**

|                  | pTKL_KD_WT - MBP |      |      | pTKL_KD_WT + MBP |      |     | pTKL_KD_WTΔ + MBP |      |      |
|------------------|------------------|------|------|------------------|------|-----|-------------------|------|------|
| Kinase (μg/well) | 0                | 4    | 8    | 0                | 4    | 8   | 0                 | 4    | 8    |
| Experiment 1     | -                | 670  | 569  | 856              | 702  | 613 | 800               | 770  | 810  |
|                  | 832              | 665  | 649  | 840              | 698  | 561 | 857               | 817  | 743  |
|                  | 722              | 664  | 566  | 835              | 707  | 556 | 857               | 825  | 794  |
| Experiment 2     | 1349             | 1161 | 900  | 1284             | 902  | 849 | 1066              | 1086 | 1006 |
|                  | 1334             | 1157 | 931  | 1299             | 824  | 652 | 1024              | 1208 | 1183 |
|                  | 1317             | 1103 | 1007 | 1221             | 860  | 645 | 1162              | 1179 | 1209 |
| Experiment 3     | 1227             | 1021 | 763  | 1013             | 842  | 656 | -                 | -    | -    |
|                  | 1207             | 991  | 749  | 1106             | 728  | 562 | -                 | -    | -    |
|                  | 1197             | 1002 | 712  | 938              | 765  | 587 | -                 | -    | -    |
|                  | pTKL_KD_ND - MBP |      |      | pTKL_KD_ND + MBP |      |     | pTKL_KD_NDΔ + MBP |      |      |
| Kinase (μg/well) | 0                | 4    | 8    | 0                | 4    | 8   | 0                 | 4    | 8    |
| Experiment 1     | 802              | 672  | 467  | 850              | 629  | 416 | 779               | 782  | 799  |
|                  | 789              | 611  | 511  | 810              | 649  | 452 | 778               | 761  | 816  |
|                  | 787              | 499  | 495  | 734              | 735  | 423 | 771               | 795  | 773  |
| Experiment 2     | 1486             | 976  | 675  | 1280             | 675  | 448 | 1323              | 1101 | 1098 |
|                  | 1515             | 1025 | 705  | 1329             | 699  | 406 | 1304              | 1230 | 1144 |
|                  | 1462             | 979  | 726  | 1150             | 605  | 416 | 1229              | 1186 | 1178 |
| Experiment 3     | 1403             | 1160 | 865  | 1295             | 1125 | 721 | 1222              | 1314 | 1209 |
|                  | 1406             | 1135 | 895  | 1308             | 1076 | 766 | 1176              | 1215 | 1178 |
|                  | 1383             | 1209 | 941  | 1259             | 1075 | 670 | 971               | 1228 | 1235 |
|                  | pTKL_KD_DG - MBP |      |      | pTKL_KD_DG + MBP |      |     | pTKL_KD_DGΔ + MBP |      |      |
| Kinase (μg/well) | 0                | 4    | 8    | 0                | 4    | 8   | 0                 | 4    | 8    |
| Experiment 1     | 799              | 648  | 488  | 823              | 682  | 541 | 756               | 773  | 760  |
|                  | 792              | 628  | 499  | 812              | 665  | -   | 784               | 788  | -    |
|                  | 786              | 751  | 491  | 825              | 672  | 772 | 782               | 754  | 622  |
| Experiment 2     | 1423             | 1100 | 883  | 1182             | 983  | 755 | 1279              | 1238 | 1288 |
|                  | 1405             | 1189 | 921  | 1283             | 922  | 710 | 1209              | 1193 | 1206 |
|                  | 1386             | 1115 | 926  | 1249             | 954  | 699 | 1159              | 932  | 1184 |
| Experiment 3     | 1374             | 1124 | 809  | 1414             | 1089 | 587 | 1247              | 1212 | 1210 |
|                  | 1370             | 1099 | 874  | 1177             | 995  | 680 | 1252              | 1131 | 1155 |
|                  | 1366             | 1126 | 850  | 1048             | 1018 | 762 | 1204              | 1167 | 1178 |
|                  | JNK1 - MBP       |      |      | JNK1 + MBP       |      |     | JNK1Δ + MBP       |      |      |
| Kinase (ng/well) | 0                | 40   | 80   | 0                | 40   | 80  | 0                 | 40   | 80   |
| Experiment 1     | 861              | 753  | 690  | 843              | 349  | 216 | 792               | 703  | 732  |
|                  | 859              | 755  | 675  | 842              | 339  | 211 | 794               | 876  | 850  |
|                  | 866              | 756  | 663  | 837              | 351  | -   | 811               | 871  | 850  |
| Experiment 2     | 1410             | 1156 | 835  | 1327             | 311  | 71  | 1132              | 1210 | 1196 |
|                  | 1397             | 1166 | 919  | 1169             | 382  | 67  | 1151              | 1118 | 1075 |
|                  | 1365             | 1152 | 880  | 1175             | 329  | 93  | 1090              | 1071 | 1141 |

### Supplementary Table S5. Y2H screening results.

| Clone number | Growth on TDO/A | Growth on QDO/A | Growth in liquid SD-leucine | DH5 $\alpha$ transformation | Sequencing result (grey = out of frame with GAL4-AD) | Protein name | <i>Pf</i> SERA5 region (AA) |
|--------------|-----------------|-----------------|-----------------------------|-----------------------------|------------------------------------------------------|--------------|-----------------------------|
| 12           | +               | +               | +                           | +                           | PF3D7_0827900                                        | PDI8         |                             |
| 156          | +               | +               | +                           | +                           | PF3D7_0207600                                        | SERA5        | 200-334                     |
| 157          | +               | +               | +                           | +                           | PF3D7_0207600                                        | SERA5        | 191-323                     |
| 183          | +               | +               | +                           | +                           | PF3D7_0207600                                        | SERA5        | 185-317                     |
| 199          | +               | +               | +                           | +                           | PF3D7_0827900                                        | PDI8         |                             |
| 249          | +               | +               | +                           | -                           | /                                                    |              |                             |
| 605          | +               | +               | +                           | +                           | PF3D7_0207600                                        | SERA5        | 188-253                     |
| 610          | +               | +               | +                           | +                           | PF3D7_0827900                                        | PDI8         |                             |
| 614          | +               | +               | +                           | +                           | PF3D7_0715600                                        |              |                             |
| 680          | +               | +               | +                           | +                           | PF3D7_0827900                                        | PDI8         |                             |
| 699          | +               | -               | /                           | /                           | /                                                    |              |                             |
| 748          | +               | +               | +                           | +                           | PF3D7_1026600                                        |              |                             |
| 988          | +               | +               | +                           | +                           | PF3D7_0207600                                        | SERA5        | 191-257                     |
| 1236         | +               | +               | +                           | +                           | PF3D7_0207600                                        | SERA5        | 201-336                     |
| 1237         | +               | +               | +                           | +                           | PF3D7_0207600                                        | SERA5        | 201-336                     |
| 1537         | +               | +               | +                           | +                           | PF3D7_0312800                                        |              |                             |
| 1546         | +               | +               | +                           | +                           | PF3D7_1028700                                        |              |                             |
| 2775         | +               | +               | +                           | +                           | PF3D7_0207600                                        | SERA5        | 200-332                     |
| 3070         | +               | +               | +                           | +                           | CHR13                                                |              |                             |
| 3087         | +               | +               | +                           | +                           | PF3D7_1140900                                        |              |                             |
| 3292         | /               | +               | +                           | +                           | PF3D7_0818900                                        |              |                             |
| 3303         | /               | +               | +                           | +                           | PF3D7_0207600                                        | SERA5        | 191-257                     |
| 3457         | /               | +               | +                           | +                           | PF3D7_0207600                                        | SERA5        | 145-276                     |
| 3597         | /               | +               | +                           | +                           | PF3D7_0827900                                        | PDI8         |                             |
| 3821         | /               | +               | +                           | +                           | PfEMP1 (VAR)                                         |              |                             |
| 4112         | /               | +               | +                           | +                           | PF3D7_1337500                                        |              |                             |
| 4117         | /               | +               | +                           | +                           | PF3D7_0207600                                        | SERA5        | 199-265                     |
| 4119         | /               | +               | +                           | +                           | PF3D7_1337500                                        |              |                             |
| 4333         | /               | +               | +                           | +                           | PF3D7_0207600                                        | SERA5        | 189-255                     |
| 4497         | /               | +               | +                           | +                           | PF3D7_0207600                                        | SERA5        | 216-365                     |
| 4921         | /               | +               | +                           | +                           | PF3D7_0207600                                        | SERA5        | 191-257                     |
| 5068         | /               | +               | +                           | +                           | PF3D7_0204100                                        |              |                             |
| 5517         | /               | +               | +                           | +                           | PF3D7_0827900                                        | PDI8         |                             |

This chart shows the results of a Y2H screening assay in which Y187 cells expressing *PfpTKL\_SAM&RVxF1* were mated with Y2Hgold cells transformed with a library of *P. falciparum* cDNAs. We streaked 6000 diploids on TDO/A and (or directly on) QDO/A media, 32 of which survived selection (clone identifiers are shown in column 1). They were cultured in liquid SD-leucine to remove the bait pGBKT7 construct (which includes an auxotrophy cassette for tryptophan) – column 4. Plasmid DNA recovered from diploids was propagated in *E. coli* DH5 $\alpha$  (column 5) and analyzed by sequencing (column 6). The two main interaction partner names (SERA5, PDI8) are shown in column 7. Regions of *Pf*SERA5 identified by sequencing are shown in column 8 (probable region involved in interaction with SAM = 216–253).

## Supplementary Figure S7 - Reverse genetics construct and genotyping data.

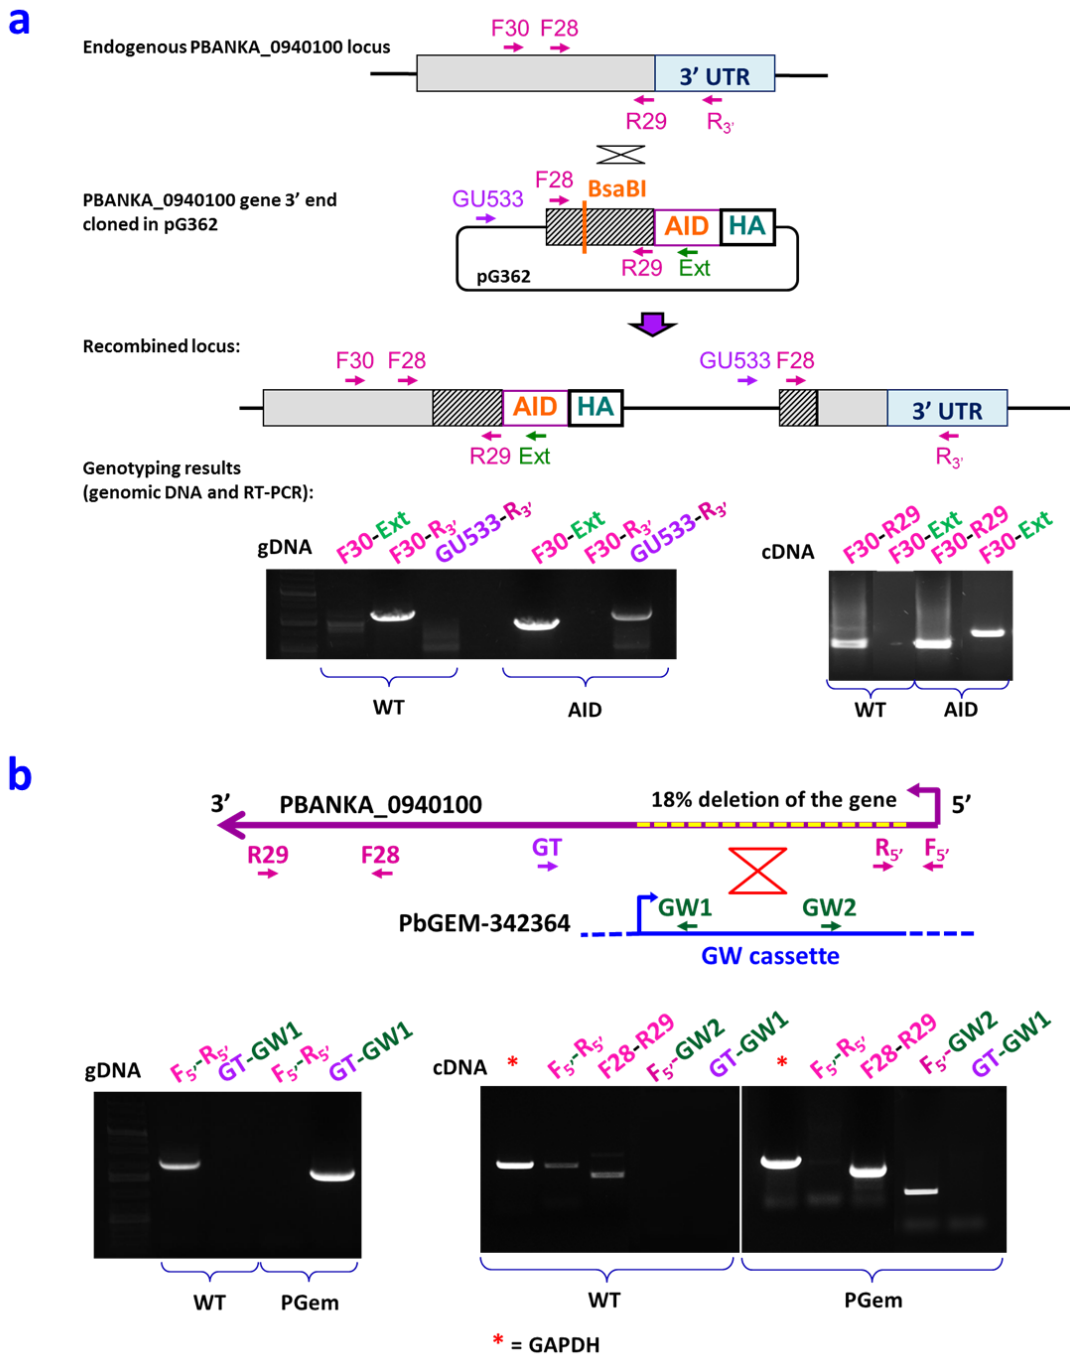

**(a) Auxin-induced degradation (AID) construct and genotyping data.** An AID-HA knock-in of *PbpTKL* segment amplified using primers F28/R29 (an overlapping PCR was performed with primers F31/R32 to insert the *Bsa*BI restriction site) was cloned in the pG362 plasmid<sup>15</sup>. The construct was linearized with *Bsa*BI before the transfection of pG230 *P. berghei* parasites. After parasite cloning by limiting dilution, endogenous locus modification was assessed by genomic PCR using primers F30/R3' (unmodified endogenous locus), F30-Ext (presence of the AID sequence downstream of *PbpTKL* endogenous locus) and GU533/R3' (full recombination of *PbpTKL*pG362 construct between *PbpTKL* locus and *PbpTKL* 3'UTR).

*PbpTKL* transcript modification (i.e. including the AID-HA-encoding region) was assessed by RT-PCR. F30/R29 primers were used to verify cDNA preparation. F30-Ext primers were used to detect the *PbpTKL-AID-HA* transcript. **(b) PlasmogEM construct (PbGEM-342364) and genotyping data.** *PbpTKL* locus modification using the PbGEM-342364 construct (obtained from the Wellcome Sanger Institute)<sup>16</sup>. The plasmid was linearized with NotI before the transfection of *PbGFP* parasites, which were cloned by limiting dilution. Endogenous locus modification was assessed by genomic PCR using primers F5'/R5' (unmodified endogenous locus) and GT/GW1 (recombination of PbGEM-342364 construct at *PbpTKL* endogenous locus). *PbpTKL* transcript expression was assessed by RT-PCR (cDNA) in parental (WT) and transfected (PGem) *P. berghei* lines. The cDNA preparations were verified by checking for the presence of the *GAPDH* transcript (red star). The F5'/R5' primers were used to detect the 5' end of the *PbpTKL* transcript and the F28/R29 primers were used to detect the 3' end. The F5'/GW2 and GT/GW1 primers were used to assess the presence of the *dhfr*-containing GW cassette at the cDNA level.

## Supplementary Figure S8 – Infected erythrocyte sequential lysis protocol.

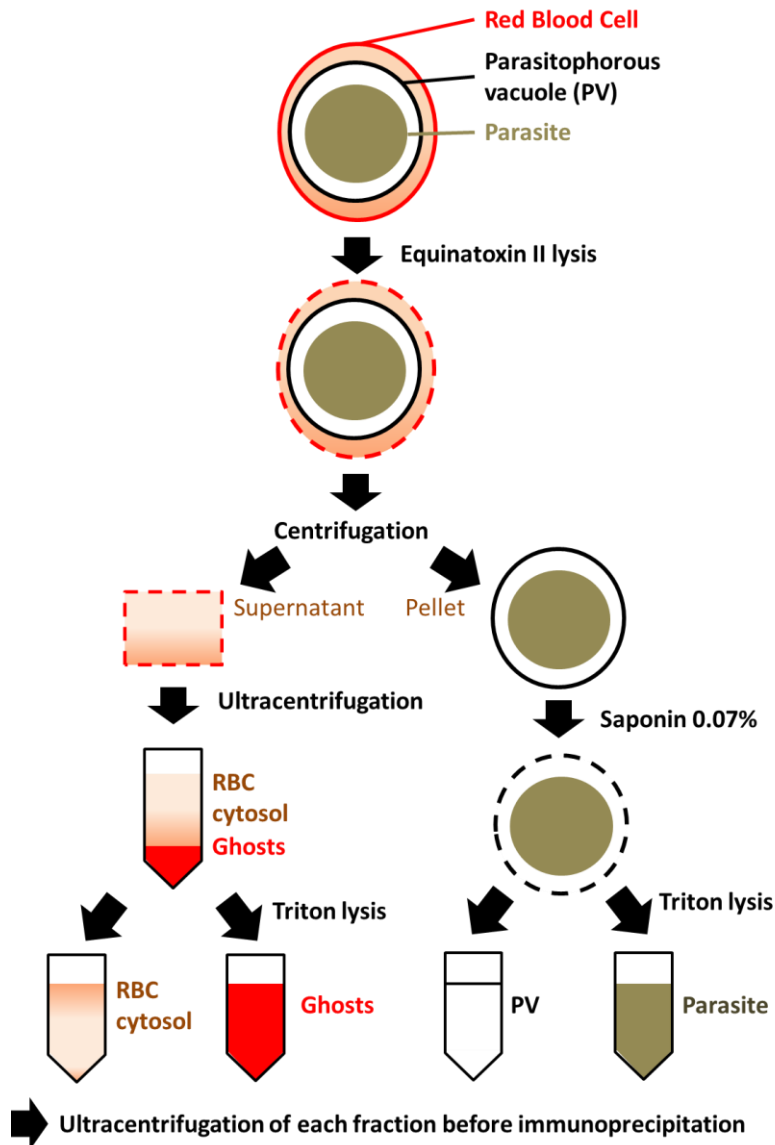

For sequential lysis, a 500- $\mu$ L dry pellet of infected erythrocytes was lysed in 3 mL of EQT buffer (20 mM Tris pH 7.4, 130 mM NaCl, 1 mM  $MgSO_4$ , 1/250 Equinotoxin II<sup>17</sup>) on a wheel for 15 min at room temperature. After centrifugation, the supernatant was fractionated by ultracentrifugation (41,657  $g$ , 4°C, 15 min) to recover ghosts. The ghosts were lysed in ice-cold Triton buffer (20 mM Tris pH 8.0, 50 mM NaCl, 9% Triton X-100, 5 mM EDTA, Roche cOmplete EDTA-free anti-protease cocktail). The pellet, composed of parasites embedded in their parasitophorous vacuole, was further lysed in 3 mL of 0.07% saponin (on ice for 10 min). After centrifugation as above, the supernatant (the parasitophorous vacuole content) was kept for further analysis while the parasite pellet was lysed in 2 mL of ice-cold Triton buffer. The EQT lysate ultra-supernatant (corresponding to the erythrocyte cytosol) was kept on ice for further analysis. Saponin, parasite and ghost lysates were diluted in total lysis buffer to 5 mL and fractionated by ultracentrifugation as above prior to immunoprecipitation.

Supplementary Figure S9. *Xenopus laevis* oocyte experiments.

a

| Micro-injection | GVBD percentage after 15 hours |              |              |
|-----------------|--------------------------------|--------------|--------------|
|                 | Experiment 1                   | Experiment 2 | Experiment 3 |
| Elution buffer  | 10                             | 0            | 0            |
| RVxF1           | 0                              | 0            | 0            |
| KD_RVxF2        | 20                             | 20           | 0            |
| KD_KRIMAS       | 0                              | 0            | 0            |
| Progesterone    | 100                            | 100          | 100          |

b

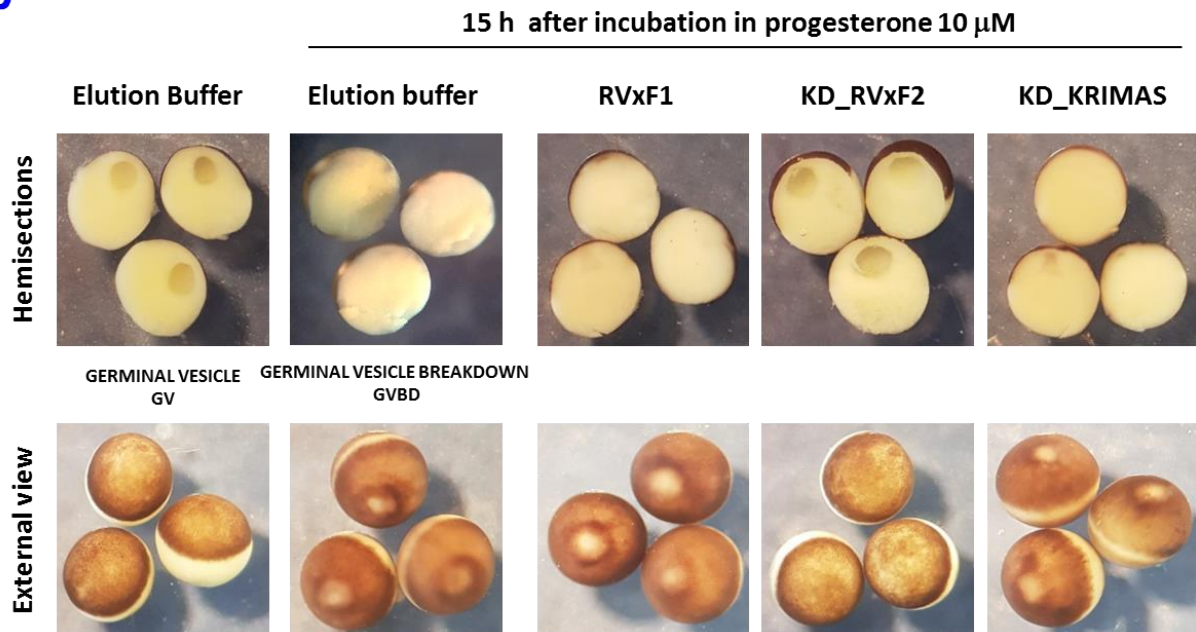

(a) Neither RVxF1 nor KD\_RVxF2 micro-injection triggers GVBD. RVxF1, KD\_RVxF2 and KD\_KRIMAS recombinant proteins were micro-injected into arrested *X. laevis* oocytes (protein elution buffer was used as a negative control). GVBD percentage was assessed 15 h later by looking for the appearance of a white maturation spot. This experiment shows that none of the micro-injected proteins can trigger GVBD. (b) RVxF2 inhibits progesterone-induced GVBD. RVxF1, KD\_RVxF2 and KD\_KRIMAS recombinant proteins were micro-injected into arrested *X. laevis* oocytes. They were treated with progesterone (PG) 1 h later and GVBD was assessed by the rise of the oocyte nucleus to the surface of the oocyte (i.e. the absence of any nucleus inside the oocyte – hemisection lane – and the appearance of a white maturation spot at the surface of the oocyte – outside view lane). This figure supports the chart shown in Figure 5c.



## Uncropped blots

### Uncropped versions of western blots shown in Figure 5

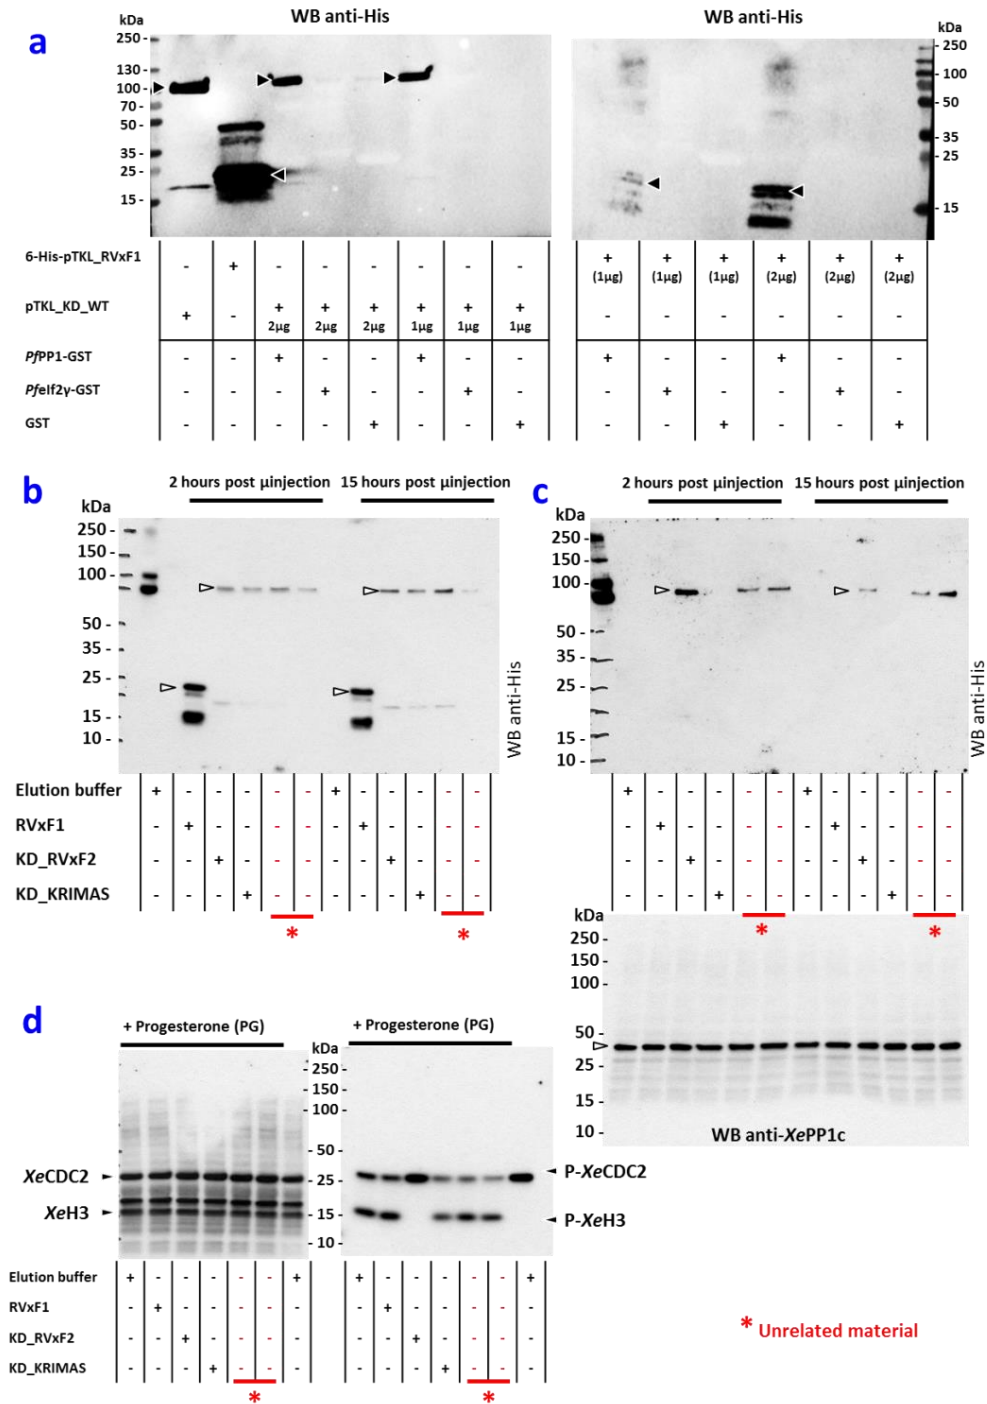

(a) RVxF1 and RVxF2 both directly bind *Pf*PP1c *in vitro* (Fig. 5a)

(b-c) Only RVxF2 binds *Xe*PP1c (Fig. 5b)

(d) Only RVxF2 exerts a functional role in *Xenopus laevis* oocytes (Fig. 5d)

Uncropped versions of western blots shown in Figure 6c

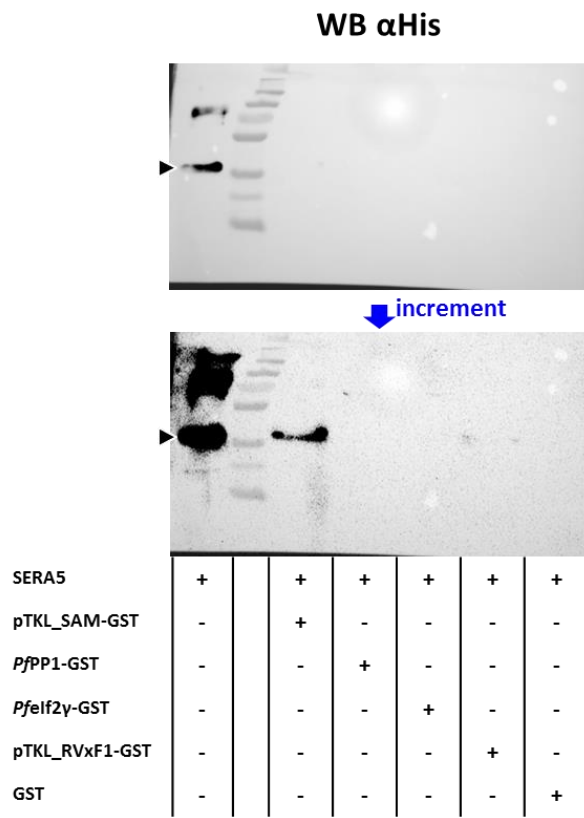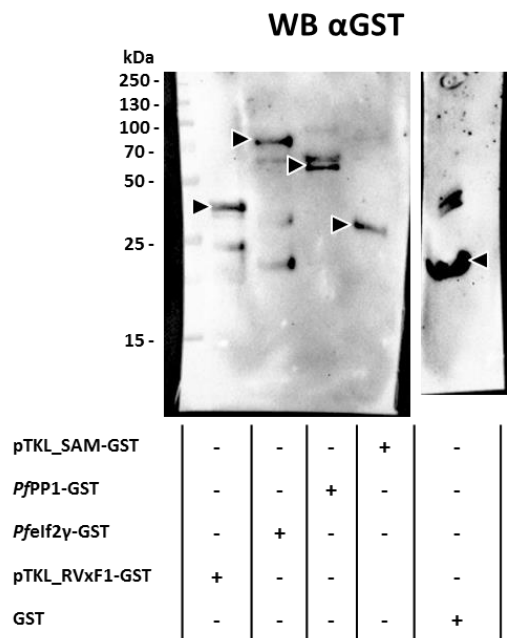

Uncropped versions of western blots shown in Figures 7c-d

a. Fraction Analysis

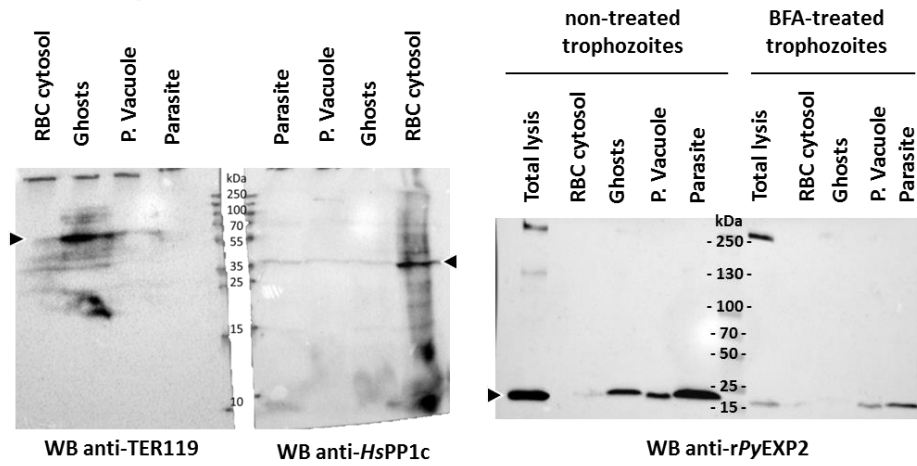

b

Immunoprecipitations run on *PbpTKL*-AID-HA (anti-HA WB)

Fractions (anti-HA WB)

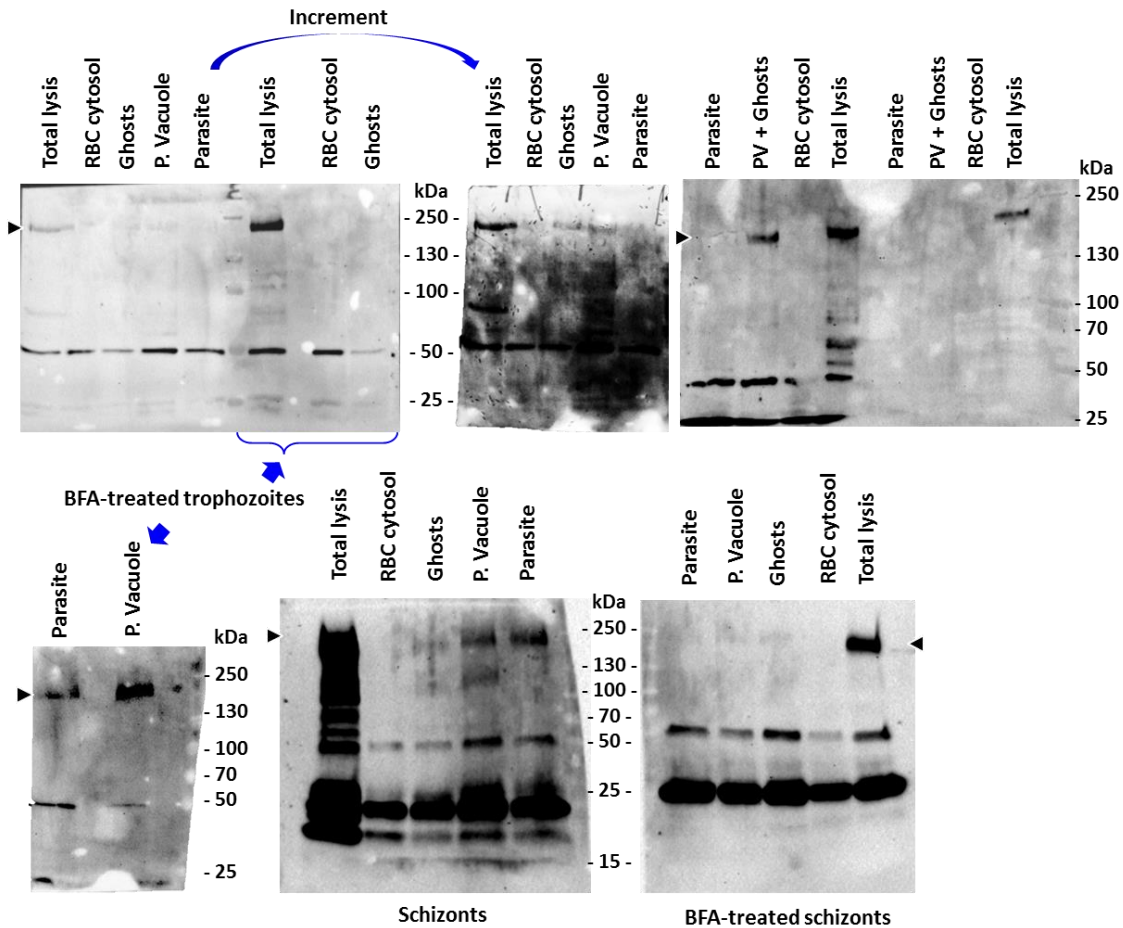

(a) Infected erythrocyte sequential lysis fraction analysis and validation.

(b-c) *PbpTKL* is actively exported from the parasite between the trophozoite and schizont stages.

Uncropped versions of western blot shown in Figure 8

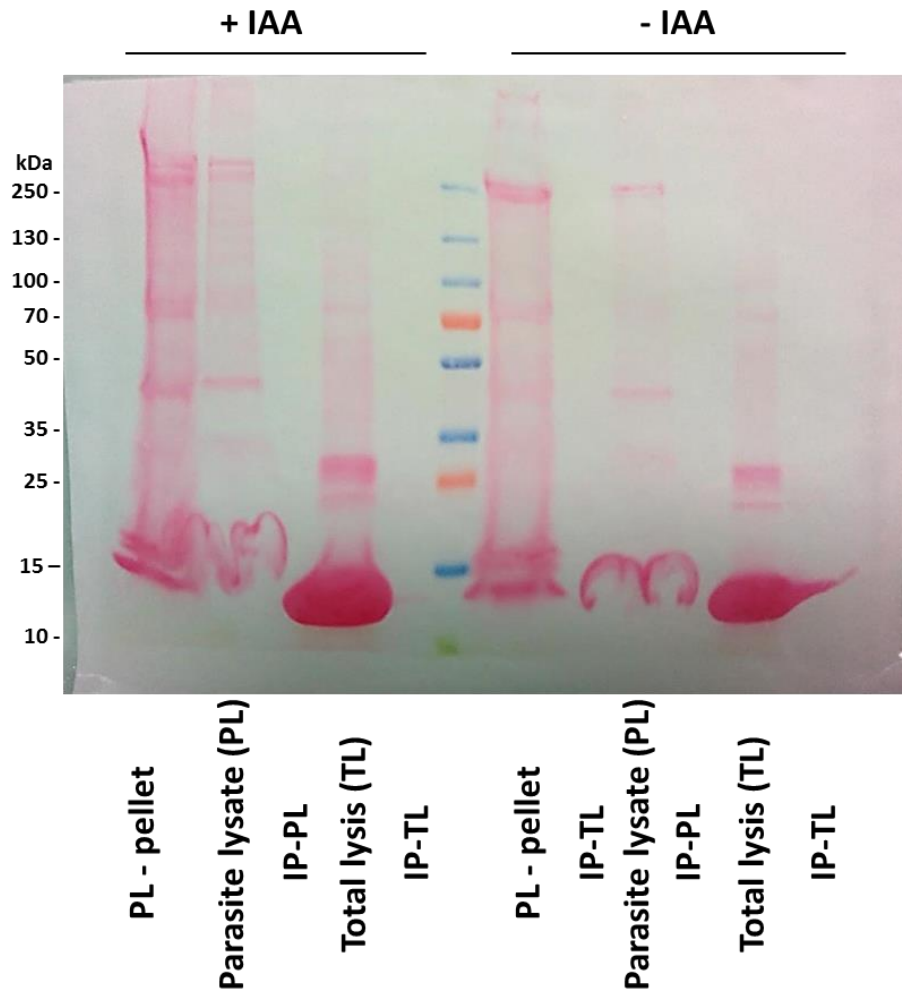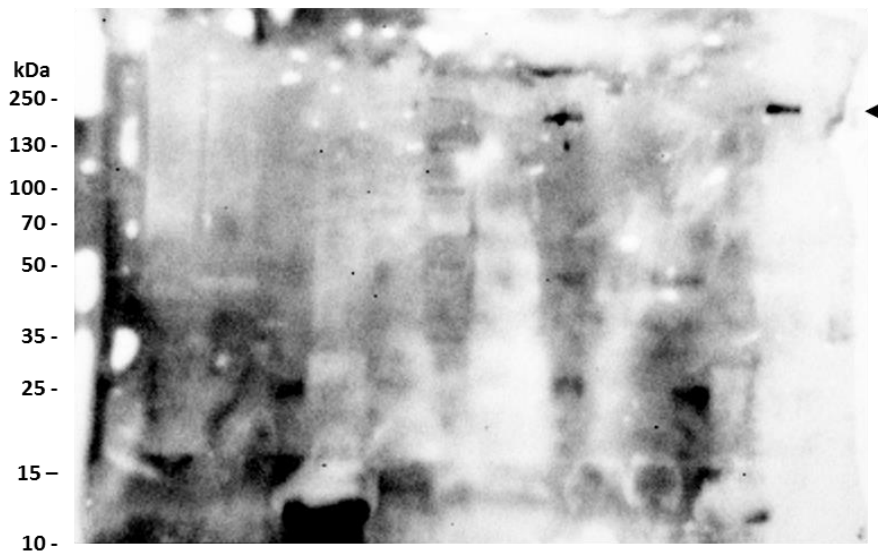

WB anti-HA

## NanoLC/MS protein identification and quantification (mass spectrometry)

### S-Trap:

S-Trap micro-spin column (Protifi, Huntington, USA) digestion was performed on immunoprecipitation eluates according to the manufacturer's protocol. Briefly, 5% SDS was added to the samples. Proteins were alkylated by the addition of iodoacetamide to a final concentration of 50 mM. Aqueous phosphoric acid was added to a final concentration of 1.2%. A colloidal protein particulate was formed by adding six sample volumes of S-Trap binding buffer (90% aqueous methanol, 100 mM Tetraethylammonium bromide (TEAB), pH 7.1). The mixtures were transferred to the S-Trap 1.7-mL columns and centrifuged at 4000 *g* for 30 s. The columns were washed five times with 150  $\mu$ L S-Trap binding buffer and centrifuged at 4000 *g* for 30 s with 180 degrees rotation of the columns between washes. Samples were digested with 2  $\mu$ g trypsin (Promega) at 37°C overnight. Peptides were eluted with 40  $\mu$ L of 50 mM TEAB followed by 40  $\mu$ L of 0.2% aqueous formic acid and 35  $\mu$ L 50% acetonitrile containing 0.2% formic acid before vacuum drying.

### NanoLC-MS/MS protein identification and quantification:

Samples were resuspended in 35  $\mu$ L of 0.1% TFA in HPLC-grade water. For each run, 5  $\mu$ L was injected into a nanoRSLC-Q Exactive PLUS RSLC Ultimate 3000 column (Thermo Fisher Scientific). Peptides were loaded onto a  $\mu$ -precolumn (Acclaim PepMap 100 C18, cartridge, 300  $\mu$ m i.d. $\times$ 5 mm, 5  $\mu$ m) (Thermo Fisher Scientific), and were separated on a 50 cm reversed-phase column (0.075 mm ID, Acclaim PepMap 100, C18, 2  $\mu$ m) (Thermo Fisher Scientific). The solvents were (A) 0.1% formic acid in water, and (B) 80% acetonitrile, 0.08% formic acid. Peptides were eluted from the column with the following gradient 5% to 40% B (120 min), 40% to 80% (1 min). The gradient was then maintained at 80% for 5 min before returning to 5% over 20 min for re-equilibration prior to the next injection. Two blanks were run between each series to prevent sample carryover. Peptides eluting from the column were analyzed by data-dependent MS/MS, using the top-10 acquisition method. Peptides were fragmented using higher-energy collisional dissociation (HCD). Briefly, the instrument settings were as follows: resolution was set to 70,000 for MS scans and 17,500 for the data-dependent MS/MS scans in order to increase speed. The MS AGC target was set to 3.106 counts with maximum injection time set to 60 ms, whereas the MS/MS AGC target was set to 1.105 with maximum injection time set to 60 ms. The MS scan range was from 400 to 2000 *m/z*. Dynamic exclusion was set to 30 s duration.

### Supporting Information 1 – Synthetic gene 1 – pTKL\_SAM-GST

Gene Length: 342 bp, Vector name: pUC57, Cloning site: EcoRV-HindIII ,

Gene sequence:

```
GATATCGGATCCGAATTCAAAAACTGTTCAAATACTTTAGCAATAACATCGAAAACCTGATTATCGAAAACCTACCA
AACCTGGAGCCTGCGCGAAGTGATTCAATGGCTGATGCTGTGCAACGTGCCGGTTAAGTGGCTGATCAGCTTCTAC
AAAAACAACATTACCGGTGACAAGCTGAAATATATCAACATTAACACCATCCGTAACGAGCTGGGTATCATTGCGT
ACGGCCACGCGATCAAGATTCTGCAGCTGATTA AAAACCTGCAAGTGATGGCGTATAATAAGAAGTTTAAACAACCT
GATCCAGATTGAGGAGTACAAGAATCTCGAGAAGCTT
```

Protein sequence:

```
DIGSEFKKLFKYFSNNIENLIENYQTSLSREVIQWLMLCNVPVKWLISFYKNNITGDKLKYININTIRNELGIIAYGHAIKIL
QLIKNLQVMAYNKKFNLIQIEEYKNLEKL
```

### Supporting Information 2 – Synthetic gene 2 – pTKL\_KD\_WT

Gene Length: 1116 bp, Vector name: pEX-A258, Cloning site: EcoRI-BamHI ,

```
GAATTCGACAATCACATTTACTGCAATAACATTTACGATCACCACAAAAACACGTCATTGAACTCGAAAGAACAAAA
TACGGACCATAACATCGAACAGATTAATGAGTGTAAACAAATATGCCAGTGAAACCAAATACAACATTAAGAAATCG
AACCTGAAGAATAACATTATCTCGCATAAGAACTTCCAGAAATGCAATCAGATTCAGATGAACCAACCCTACACGTT
TCCACCATATCAGAAAGAACTGAGCTCTTATCTTAAAAACGAAAAGATCAAACGGAAACGCAAAGTGCTGTTT
TCCTACCTGAAAACCCATATTCACTTCAACAGTCAGCAGATTAACGATCAACACAATCGCTTATCTGTGCAGAAAAT
TATGAAAATCATTACTGATGTCACCCTTGCTTGCACATATCTGGAAAAGGAGAAAATGAGCCCCATTAATCTGAAAC
CTACCAATATCCTGTTGGACGAATCTCTGAATGCCAAAATTAGCGATTTCCGGTATCAGCAAAAATTGAGAATTGTCTG
GATATGAACATTGACTATTCATACAAAATTAGCTCCAACCTCAGTCATCAAAAATTAATAAAAAAGAATATGAGCAAAA
GAAAGCGAAGAAAATCAAATTTGTGAATAAAAAACAATAATGACTTACTGTACCTGTACGATCACAATAACAACGTC
TATAAGTACAATACCAATATATCGACGTAACCTATAACAACAGTTATCCGAGCATCTTCTATTGGACTCCTCCGGA
AATCTTACGTGGCAAAAAAACAAGAAATTTACAGCGATTTTACGCATTTGGGATCATCCTCTGGGAAATGCTG
AGTAATGATATTCGGTACAACATCCGTTTGCATCCCATATTATGGCCGTTGTAGGCTATGCGAATGAAGAACTGTC
ATTCAACAACATTCCGTTTTCCATTGAGTCGTTGATCAAAGCGTGTGTTAATCGCAACAAATATAAGCGTCCGACGT
TTGAGCATATTCTGAAAACGATCTCTACACTCTATCAGAAAGCGAATACCAAAGTGGAAGATGCTCTTATCAGCTTT
ATGGATGGTACTCTCGAGCATCATCACCATCATCATTAAGGATCC
```

Protein Sequence:

```
EFDNHIYCNNIYDHHKNTSLNSKEQNTDHNIEQINECNKYASETNYNIKSNLKNNIISHKNFQKCNQIQMNQPYTFPPY
QKELSSYLKNEKIKRKRKVLFSYLKTHIHFNSSQINDQHNRLSVQKIMKIITDVTLACTYLEKEKMSPINLKPTNILLDESLNA
KISDFGISKIENCLDMNIDYSYKISSNSVIKINKKEYEQKKAKKIKIVNKNNDLLYLDHNNNVYKYNTQYIDVTYNNSYPSI
FYWTPPEILRGKKNKKFYSDIYAFGIILWEMLSNDIPYNYPFASHIMAVVGYANEELSFNNIPVSIQSLIKACVNRNKYKRP
TFEHILKTISTLYQKANTKVEDALISFMDGTLEHHHHHH
```

### Supporting Information 3 – MAFFT Alignment of *Pfp*TKL orthologs BTK-like domains

| PF3D7_1106800    | AA numbering | 841        | 851        | 860        | 868        | 878        | 888        | 895        | 905        |
|------------------|--------------|------------|------------|------------|------------|------------|------------|------------|------------|
|                  |              | .... ....  | .... ....  | .... ....  | .... ....  | .... ....  | .... ....  | .... ....  | .... ....  |
| Hs_PKAc_Nlobe    |              | GTGSFGRVM- | -LVKHKETGN | HYAMKILDQ  | KVV--KLKQI | EHTLNEKRIL | QAVNPFPLVK | LEFSFKDNSN | LYMVMYVPG  |
| Hs_BTK_Nlobe     |              | GTGQFGVVKY | GKWRGQY--- | DVAIKMIKEG | SMSDEFIEE  | AKVMN---L  | SHEKLVQLYG | VCTKQR---P | IFIITEYMAN |
| PF3D7_1106800    |              | ---KYKKMKS | RMFKGKYMKG | EVAIKIL-VG | KIK--NFKKL | HQILYNLYNL | RHSNLVLMG  | VSIHYP---F | VFIIYEYMKN |
| PFIT_1107600     |              | ---KYKKMKS | RMFKGKYMKG | EVAIKIL-VG | KIK--NFKKL | HQILYNLYNL | RHSNLVLMG  | ISIHYP---F | VFIIYEYMKN |
| PPRFG01_1107500  |              | ---KYKKMKS | RMFKGKYMKG | EVAIKIL-VG | KIK--NFKKL | HQVLYNLYNL | RHSNLVLMG  | VSIHYP---F | VFIIYEYMKN |
| PRCDC_1105300    |              | ---KYKKMKS | RMFKGKYMKG | EVAIKIL-VG | KIK--NFKKL | HKILYNLYNL | RHSNFVLMG  | VSIHYP---F | VFIIYEYMKN |
| PRG01_1104000    |              | ---KYKKMKS | RMFKGKYMKG | EVAIKIL-VG | KIK--NFKKL | HKILYNLYNL | RHSNFVLMG  | VSIHYP---F | VFIIYEYMKN |
| PBLACG01_1104300 |              | ---KYKKMKS | RMFKGKYMKG | EVAIKIL-VG | KIK--NFKKL | HQILYNLYNL | RHTNLVLMG  | VSIHYP---F | VFIIYEYMKN |
| PADL01_1105000   |              | ---KYKKMKS | RMFKGKYMKG | EVAIKIL-VG | KIK--NFKKL | HQILYNLYNM | RHSNFVLMG  | VSIHYP---F | IFIIEYMKN  |
| PGABG01_1103900  |              | ---KYKKMKS | RMFKGKYMKG | EVAIKIL-VG | KIK--NFKKL | HQILYNLYNM | RHSNFVLMG  | VSIHYP---F | IFIIEYMKN  |
| PGSY75_1106800   |              | ---KYKKMKS | RMFKGKYMKG | EVAIKIL-VG | KIK--NFKKL | HQILYNLYNM | RHSNFVLMG  | VSIHYP---F | IFIIEYMKN  |
| PBILCG01_1104000 |              | ---KYKKMKS | RMFKGKYMKG | EVAIKVL-VG | KIK--NFKKL | HQTLYKLYNL | RHSNLVLMG  | VSIHYP---F | LFIIYEYMKN |
| PGAL8A_00334100  |              | ---KYTKLKS | RVFKGKYMKG | EVAIKVL-VG | KIK--NFKKL | HKILYKLYIL | RHSNIVLMG  | VSISYP---F | VFIVYEYLNK |
| PRELSG_0904000   |              | ---KYRKLKS | RVFKGKYMKG | EVAIKVL-VG | KIK--NFKKL | HKILYKLYIL | RHSNIVLMG  | ISISYP---F | VFIVYEYLNK |
| PYYM_0941700     |              | ---KPQMKKS | RIFRGRYMGK | DVAIKVL-VG | NIK--NFTKF | HKVLYNLYIL | RHTNIALMG  | VSISYP---F | VFIIYEYIKN |
| PY02791          |              | ---KPQMKKS | RIFRGRYMGK | DVAIKVL-VG | NIK--NFTKF | HKVLYNLYIL | RHTNIALMG  | VSISYP---F | VFIIYEYIKN |
| PBANKA_0940100   |              | ---KPQMKKS | RVFRGRYMGK | DVAIKVL-VG | NIK--NFTKF | HKVLYKLYIL | RHTNIALMG  | VSISYP---F | VFIIYEYIKN |
| PCHAS_0904200    |              | ---KPQMKKS | RVFRGRYMGK | DVAIKVL-VG | NIK--NFTKF | HKVLYKLYIL | RHTNIALMG  | VSISYP---F | VFIIYEYVKN |
| YYG_01693        |              | ---KPQMKKS | RVFRGRYMGK | DVAIKVL-VG | NIK--NFTKF | HKVLYKLYIL | RHTNIALMG  | VSISYP---F | VFIIYEYVKN |
| YYE_02751        |              | ---KPQMKKS | RVFRGRYMGK | DVAIKVL-VG | NIK--NFTKF | HKVLYKLYIL | RHTNIALMG  | VSISYP---F | VFIIYEYVKN |
| PmUG01_09016400  |              | ---NYRKLKS | RVFKGKYMKG | DVAIKVL-VG | KIK--NFYHF | HKMIYKLYVL | RHSNIALMG  | VAIYYP---F | VFIVYEYLNK |
| PocGH01_09013500 |              | ---RYKRLHS | RVFLGKYMKG | DVAIKVL-VG | KIT--KFHKL | YRILYKLYTL | RHSNIVLMG  | VSIKYP---F | LFIVYEHVKN |
| C922_04039       |              | ---NGKTMQS | RTFRGKYLKG | DVAIKVL-VG | RVK--DFEQI | HKIFYKLHLF | GHGNIALLMG | VSIRYP---F | VFIIYEFLKN |
| PcyM_0908600     |              | ---NGKIMGS | RTFRGKYLKG | DVAIKVL-VG | RVK--DFSQI | HKIFYKLHLI | RHGNIALLMG | VSIRYP---F | VFIVYEFLKN |
| PVP01_0907600    |              | ---NGKVMRS | RTFRGKYLKG | DVAIKVL-VG | RVK--DFSQI | HKIFYKLHLL | RHGNIALLMG | VSIRYP---F | VFIIYEFLKN |
| PVX_091015       |              | ---NGIVMRS | RTFRGKYLKG | DVAIKVL-VG | RVK--DFSQI | HKIFYKLHLL | RHGNIALLMG | VSIRYP---F | VFIIYEFLKN |
| PKNOH_S120122800 |              | ---NDKIMNS | RTFRGKYLKG | DVAIKVL-VG | RVK--DFSEI | HKVFYKLHLL | RHGNIALLMG | VSIRYP---F | VFIISEFLKN |
| PKNH_0904400     |              | ---NDKIMNS | RTFRGKYLKG | DVAIKVL-VG | RVK--DFSEI | HKVFYKLHLL | RHGNIALLMG | VSIRYP---F | VFIISEFLKN |

## Supporting Information 4 - MAFFT Alignment Kinase Domains (phylogenetics analysis)

|                                 | 10            | 20               | 30            | 40         | 50           | 60            | 70          | 80       | 90    | 100 |
|---------------------------------|---------------|------------------|---------------|------------|--------------|---------------|-------------|----------|-------|-----|
| At_CDPK1                        |               |                  |               |            | YILGR        | ELGRGEFGITYL  |             |          |       |     |
| At_CTR1                         |               |                  |               |            | LNIKE        | KIGAGSFGTVHR  |             |          |       |     |
| FIKK1 (PF3D7_0102600)           |               |                  |               |            |              |               |             |          |       |     |
| FIKK10.1 (PF3D7_1016400)        |               |                  |               |            |              |               |             |          |       |     |
| FIKK10.2 (PF3D7_1039000)        |               |                  |               |            |              |               |             |          |       |     |
| FIKK11 (PF3D7_1149300)          | YNKKKFRVQEMFK | TVITSKNDNKNNSISL | FIKKIPVDIWLKQ | FEMMELYN   | GEYLVNAEN    | YVMEA         |             |          |       |     |
| FIKK12 (PF3D7_1200800)          |               |                  |               |            |              |               |             |          |       |     |
| FIKK3 (PF3D7_0301200)           |               |                  |               |            | VKQYNLMTEYD  | GEYLLAGENA    | VMEA        |          |       |     |
| FIKK4.1 (PF3D7_0424500)         |               |                  |               |            |              |               |             |          |       |     |
| FIKK5 (PF3D7_0500900)           | YSVRTSRVQKMFK | TIIDPKKENAKDQV   | KAFIKKIPVDI   | WVKQFHS    | MNEYDGE      | FLVGGENF      | VMEA        |          |       |     |
| FIKK7.1 (PF3D7_0726200)         |               |                  |               |            |              |               |             |          |       |     |
| FIKK8 (PF3D7_0805700)           |               |                  |               |            | IWVKQFNL     | MNEYDGEY      | VTDDGENF    | VMEA     |       |     |
| FIKK9.1 (PF3D7_0902000)         |               |                  |               |            |              |               |             |          |       |     |
| FIKK9.2 (PF3D7_0902100)         |               |                  |               |            |              |               |             |          |       |     |
| FIKK9.4 (PF3D7_0902300)         |               |                  |               |            |              |               |             |          |       |     |
| FIKK9.5 (PF3D7_0902400)         |               |                  |               |            |              |               |             |          |       |     |
| FIKK9.6 (PF3D7_0902500)         |               |                  |               |            |              |               |             |          |       |     |
| FIKK9.7 (PF3D7_0902600)         |               |                  |               |            | YERMELYN     | GEYILKGEN     | YVMEA       |          |       |     |
| Hs_ABL1                         |               |                  |               |            | ITMKH        | KLGGQYGEVYE   |             |          |       |     |
| Hs_BTK                          |               |                  |               |            | LTFLK        | ELGTGQFVVKY   |             |          |       |     |
| Hs_CAMK1                        |               |                  |               |            | YDFRD        | VLGTGAFSEVIL  |             |          |       |     |
| Hs_CDK2                         |               |                  |               |            | FQKVE        | KIGEGTYGVVYK  |             |          |       |     |
| Hs_CK1                          |               |                  |               |            | YKLVK        | KIGSGSFGDIYL  |             |          |       |     |
| Hs_CLK1                         |               |                  |               |            | YEIVD        | TLGEGAFGKVE   |             |          |       |     |
| Hs_ERK1                         |               |                  |               |            | YTQLQ        | YIGEGAYGMVSS  |             |          |       |     |
| Hs_FGFR1                        |               |                  |               |            | LVLGK        | PLGEGCFGQVVL  |             |          |       |     |
| Hs_GC2N_2                       |               |                  |               |            | FEELQ        | LLKGAFGAVIK   |             |          |       |     |
| Hs_IGFR1                        |               |                  |               |            | ITMSR        | ELGQGSFGMVE   |             |          |       |     |
| Hs_IRAK1                        |               |                  |               |            | FSSE         | LKIGEGGFCVVR  |             |          |       |     |
| Hs_JAK2_1                       |               |                  |               |            | LIFNE        | SLGQGFTRKIFK  |             |          |       |     |
| Hs_LCK                          |               |                  |               |            | LKLVE        | RLGAGQFGEVNM  |             |          |       |     |
| Hs_LYN                          |               |                  |               |            | IKLVK        | RLGAGQFGEVNM  |             |          |       |     |
| Hs_NEK1                         |               |                  |               |            | YVRLQ        | KIGEGSFGKAIL  |             |          |       |     |
| Hs_PAK1                         |               |                  |               |            | YTRFE        | KIGQAGSTVYV   |             |          |       |     |
| PfPK8 (PF3D7_0203100)           | R             |                  |               |            | INEEHKNE     | GINKLTYHNMNK  |             |          |       |     |
| Hs_PKAcA                        |               |                  |               |            | FERIK        | TLGTGSFGRVML  |             |          |       |     |
| Hs_RAF1                         |               |                  |               |            | VMLST        | RIGSGSFGTVYK  |             |          |       |     |
| Hs_RIOK1                        |               |                  |               |            | TEING        | CISTCKEANVYH  |             |          |       |     |
| Hs_RIOK2                        |               |                  |               |            | VGN          | QMGVCKESDIYI  |             |          |       |     |
| Hs_RIOK3                        |               |                  |               |            | ETITG        | CISTGKESVVFH  |             |          |       |     |
| Hs_VGFR1                        |               |                  |               |            | LKLGK        | SLGRGAFGKVVQ  |             |          |       |     |
| PBANKA_0940100                  |               |                  |               |            | FTNES        |               |             |          |       |     |
| PbRIO1 (PBANKA_1445600)         | TRDKRATVN     | SVLD             | NRTLLILKLL    | KNIFFNELYG | VVSSGKEAFVFN | AHKILSNEEIK   | SVKELIFRYAK | KWNTYKRK | VNGIV |     |
| PbRIO2 (PBANKA_0521400)         | ENKIYDGYKLYLG |                  | YDFLALRAFL    | NRGILKSVGN | QIGVCKESDIYI |               |             |          |       |     |
| PbTKL1 (PBANKA_0308500)         |               |                  |               |            | IWLK         | LIGRGGYNNVYK  |             |          |       |     |
| PbTKL2 (PBANKA_0927000)         |               |                  |               |            | FSEEN        | KIARCGNGIVYK  |             |          |       |     |
| PbTKL4 (PBANKA_1122700)         |               |                  |               |            | VNEE         | EENGKNDGEVYM  |             |          |       |     |
| PF3D7_1106800                   |               |                  |               |            | H            | NVLGGAYDNNDN  | NINDNDIY    |          |       |     |
| PfABCk1 (PF3D7_0810200)         |               |                  |               |            |              | KEIGEDYE      |             |          |       |     |
| PfABCk2 (PF3D7_1414500)         |               |                  |               |            |              | KELGNIYE      |             |          |       |     |
| PfARK1 (PF3D7_0605300)          |               |                  |               |            | FDIAG        | FLGDGAHGSVFL  |             |          |       |     |
| PfARK2 (PF3D7_0309200)          |               |                  |               |            | IVDKY        | PIGNRTGLVFK   |             |          |       |     |
| PfARK3 (PF3D7_1356800)          |               |                  |               |            | FSDPG        | NIGEGGFGLVTK  |             |          |       |     |
| PfCDPK1 (PF3D7_0217500)         |               |                  |               |            | YFKVR        | KLGSAYGEVLL   |             |          |       |     |
| PfCDPK2 (PF3D7_0610600)         |               |                  |               |            | YIIDE        | KLGGQTYGCVYK  |             |          |       |     |
| PfCDPK3 (PF3D7_0310100)         |               |                  |               |            | NLSKE        | PLGKGYGCVYK   |             |          |       |     |
| PfCDPK4 (PF3D7_0717500)         |               |                  |               |            | YKGIK        | ILGKGSFGEVIL  |             |          |       |     |
| PfCDPK5 (PF3D7_1337800)         |               |                  |               |            | YEDRY        | KLKGSYGNVVK   |             |          |       |     |
| PfCDPK6 (PF3D7_1122800)         |               |                  |               |            | LSFKK        | ILGKGSFGEVHL  |             |          |       |     |
| PfCDPK7 (PF3D7_1123100)         |               |                  |               |            | YELHE        | QLGQKGFSTVYR  |             |          |       |     |
| PfCK1.1 (PF3D7_1136500.2)       |               |                  |               |            | YALGK        | KLGSFGDIYV    |             |          |       |     |
| PfCK2alpha (PF3D7_1108400)      |               |                  |               |            | YEIMK        | KIGRKYSEVFN   |             |          |       |     |
| PfCLK1 (PF3D7_1445400)          |               |                  |               |            | FLVIR        | KMGDGTFRVLL   |             |          |       |     |
| PfCLK3 (PF3D7_1114700)          |               |                  |               |            | VVCE         | LVGKGFVSNVVK  |             |          |       |     |
| PfCRK1 (PF3D7_0417800)          |               |                  |               |            | YKLLN        | KISEGTYGAVYR  |             |          |       |     |
| PfCRK3 (PF3D7_0415300)          |               |                  |               |            |              | SSY           |             |          |       |     |
| PfCRK4 (PF3D7_0317200)          | GVG           |                  |               |            |              | KISRGVHNYVKS  |             |          |       |     |
| PfCRK5 (PF3D7_0615500)          |               |                  |               |            | FRKNV        |               |             |          |       |     |
| PfGSK3 (PF3D7_0312400)          |               |                  |               |            | YKLVN        | IIGNSGFVVYE   |             |          |       |     |
| PfIK1 (PF3D7_1444500)           |               |                  |               |            | ERMKNE       | KIISGKIKNENI  |             |          |       |     |
| PfKIN (PF3D7_1454300)           |               |                  |               |            | IVTKK        | KIGKTFGKCVL   |             |          |       |     |
| PfMAPK1 (PF3D7_1431500)         |               |                  |               |            | YDILK        | KVKGAYGVVFK   |             |          |       |     |
| PfMAPK2 (PF3D7_1113900)         |               |                  |               |            | YEIKH        | LIGRGSYGVVYL  |             |          |       |     |
| PfMRK (PF3D7_1014400)           |               |                  |               |            | IFKFN        | FLGEGSYGKVK   |             |          |       |     |
| PfNEK1 (PF3D7_1228300)          |               |                  |               |            | YEVIK        | KIGNRREFEVEL  |             |          |       |     |
| PfNEK2 (PF3D7_0525900)          |               |                  |               |            | YEVVK        | SIGRGSFGLVFA  |             |          |       |     |
| PfNEK3 (PF3D7_1201600)          |               |                  |               |            | D            | EIYISKVYDIYD  |             |          |       |     |
| PfNEK4 (PF3D7_0719200)          |               |                  |               |            | YEKIR        | DIGKNGYNTIL   |             |          |       |     |
| PfPK1 (PF3D7_0821100)           |               |                  |               |            |              |               |             |          |       |     |
| PfPK2 (PF3D7_1238900)           |               |                  |               |            | YVLNK        | KIGKGSFSTAYI  |             |          |       |     |
| PfPK4 (PF3D7_0628200)           |               |                  |               |            |              |               |             |          |       |     |
| PfPK5 (PF3D7_1356900)           |               |                  |               |            | YHGLE        | KIGEGTYGVVYK  |             |          |       |     |
| PfPK6 (PF3D7_1337100)           |               |                  |               |            | DFFLY        | VIGKGYGIVYK   |             |          |       |     |
| PfPK7 (PF3D7_0213400)           |               |                  |               |            | YRIIR        | TLNQCENKIL    |             |          |       |     |
| PfPK9 (PF3D7_1315100)           |               |                  |               |            | YIVK         | RIGSGGFVIVFQ  |             |          |       |     |
| PfPKA (PF3D7_0934800)           |               |                  |               |            | FNFTIR       | TLGTGSFGRVIL  |             |          |       |     |
| PfPKB (PF3D7_1246900)           |               |                  |               |            | FNVLK        | VIGEGSYGKVM   |             |          |       |     |
| PfPKG (PF3D7_1436600)           |               |                  |               |            | LETFR        | IIGRGTFGTVKL  |             |          |       |     |
| PfPutativeCamK2 (PF3D7_1423600) |               |                  |               |            | YKFGK        | ILGCGSFGVVR   |             |          |       |     |
| PfPutativeK (PF3D7_0107600)     |               |                  |               |            | ILLKGY       | CYNNGNFALLSY  |             |          |       |     |
| PfPutativeK (PF3D7_0321400)     |               |                  |               |            | YNC          | IFLKKGEKRLVRK |             |          |       |     |
| PfPutativeK (PF3D7_0926100)     |               |                  |               |            | KY           | TVIEGSGFVVK   |             |          |       |     |





```

PFGSK3 (PF3D7_0312400)
PFIK1 (PF3D7_1444500)
PFKIN (PF3D7_1454300)
PfMAPK1 (PF3D7_1431500)
PfMAPK2 (PF3D7_1113900)
PfMRK (PF3D7_1014400)
PfNEK1 (PF3D7_1228300)
PfNEK2 (PF3D7_0525900)
PfNEK3 (PF3D7_1201600)
PfNEK4 (PF3D7_0719200)
Pfpk1 (PF3D7_0821100)
Pfpk2 (PF3D7_1238900)
Pfpk4 (PF3D7_0628200)
Pfpk5 (PF3D7_1356900)
Pfpk6 (PF3D7_1337100)
Pfpk7 (PF3D7_0213400)
Pfpk9 (PF3D7_1315100)
Pfpka (PF3D7_0934800)
Pfpkb (PF3D7_1246900)
Pfpkg (PF3D7_1436600)
PfPutativeCamK2 (PF3D7_1423600)
PfPutativeK (PF3D7_0107600)
PfPutativeK (PF3D7_0321400)
PfPutativeK (PF3D7_0926100)
PfPutativeK (PF3D7_1145200)
PfPutativeK (PF3D7_1148000)
PfPutativeK (PF3D7_1316000)
PfPutativeK (PF3D7_1331000)
PfPutativeK (PF3D7_1411300)
PFRIO1 (PF3D7_1230900)
PFRIO2 (P3D7_0420100)
PfsRPK1 (PF3D7_0302100)
PfsRPK2 (PF3D7_1443000)
PFTKL1 (PF3D7_0211700)
PFTKL2 (PF3D7_1121300)
PFTKL3 (PF3D7_1349300)
PFTKL4 (PF3D7_0623800)
Pfvps15 (PF3D7_0823000)
PvX_091015
Py02791
TGGT1_209050 (TgTKL5)
TGGT1_225770 (TgTKL8)
TGGT1_234970 (TgTKL2)
TGGT1_236240 (TgTKL6)
TGGT1_237210 (TgTKL4)
TGGT1_239130 (TgTKL7)
TGGT1_253860 (TgTKL3)
TGGT1_290225
TGGT1_301270 (TgTKL1)

-----AICIDTSEQ-----
-----KSENIKSEN-----
-----GTHIYTHEI-----
-----GRCKKNKI-----
-----AYDNANKN-----
-----AYDILKKE-----
-----VKHKRTQEF-----
-----VKDENEK-----
-----VRD-RKNDH-----
-----GTNILYGNR-----
-----AQNN-YGET-----
-----ALDKKENNF-----
-----CE--KDNKF-----
-----GVHIQTKQK-----
-----ATYK-NGNYP-----
-----VKHVQNKKL-----
-----VHKKPTKIR-----
-----CINKMTEV-----
-----GWYKGMH-----
-----VHKKITNEI-----
-----VEDSINLEM-----
-----AIDMSTQEA-----
-----QQSKEF-----
-----ALDKSTDTF-----
NNNENMIIYNQMENIHDQCSDVHNYMSQDSEIRINNYEQSEDTHFYNNDKYNGPFNKNNKNGKQDSGDDTNNDIYNDIYNDIYDDLYNDIYNDIYN
-----CRDVEDDLCLLK-----
-----NTKQF-----
-----KIILIRINKF-----
-----GVLKNC-I-----
-----F-----
-----ATWRGQ-----
-----GVLRDGV-----
-----VEDPLTCDV-----
-----VRDVSSGET-----
-----ATWRDGE-----
-----CFCMQAYPL-----PPVPVAFP-----QPRCCEGFASGSASFSGDM-----
-----ETHATQDEEDSQK-----
-----GRAVGAARRKPRE-----

210 220 230 240 250 260 270 280 290 300
.....|.....|.....|.....|.....|.....|.....|.....|.....|.....|
At_CDPK1
At_CTRL
FIKK1 (PF3D7_0102600)
FIKK10.1 (PF3D7_1016400)
FIKK10.2 (PF3D7_1039000)
FIKK11 (PF3D7_1149300)
FIKK12 (PF3D7_1200800)
FIKK3 (PF3D7_0301200)
FIKK4.1 (PF3D7_0424500)
FIKK5 (PF3D7_0500900)
FIKK7.1 (PF3D7_0726200)
FIKK8 (PF3D7_0805700)
FIKK9.1 (PF3D7_0902000)
FIKK9.2 (PF3D7_0902100)
FIKK9.4 (PF3D7_0902300)
FIKK9.5 (PF3D7_0902400)
FIKK9.6 (PF3D7_0902500)
FIKK9.7 (PF3D7_0902600)
Hs_ABL1
Hs_BTK
Hs_CAMK1
Hs_CDK2
Hs_CK1
Hs_CLK1
Hs_ERK1
Hs_FGFR1
Hs_GCN2_2
Hs_IGFR1
Hs_IRAK1
Hs_JAK2_1
Hs_LCK
Hs_LYN
Hs_NEK1
Hs_PAK1
Pfpk8 (PF3D7_0203100)
Hs_PKAca
Hs_RAF1
Hs_RIOK1
Hs_RIOK2
Hs_RIOK3
Hs_VGFR1
PBANKA_0940100
PbRIO1 (PBANKA_1445600)
PbRIO2 (PBANKA_0521400)

-----LACKS-I-----
-----DVAVKI-L-----
-----VVY-----
-----FIAPKL-YKILY-----
-----IAPKL-LKILY-----
-----IAPKF-YKLLY-----
-----ITAKL-YALLY-----
-----KY-MEDII-----
-----ITPKL-YKILY-----
-----YRLLY-----
-----ISPHF-YTLLY-----
YSLTVAVKT-L
QY-DVAIKM-I
-----VAIKC-I-----
-----VALKK-I-----
-----VAVKL-----
-----VAVKI-VK-----
-----VAIKK-I-----
KPNRVTKVAVKM-L
-----YAVKR-IPI-----
E-PET-RVAIKT-V
-----YAVKR-L-----
GQLHET-EVLLKV-LD
-----HT-KVAVKS-L-----
-----ST-KVAVKT-L-----
-----YVIKE-I-----
-----VAIKQ-M-----NLQQQP
SYDEDNLVSLKI-I
-----YAMKI-L-----
DVAVKI-L
-----AIKI-Y-----
LHRLGRFSFRN-L
SKVIPTCAIKV-F
PTCRT--VAVKM-L
QNLKKN
EIIIEFENNKTEIIDIKNEIN-----VFDIIDQLDKLIYKDE-----NYISDILE--NKKIAVSFAIKI-Y
IHLRGRISFRT-I

```

PbTKL1 (PBANKA\_0308500)  
PbTKL2 (PBANKA\_0927000)  
PbTKL4 (PBANKA\_1122700)  
PF3D7\_1106800  
PfABCK1 (PF3D7\_0810200)  
PfABCK2 (PF3D7\_1414500)  
PfARK1 (PF3D7\_0605300)  
PfARK2 (PF3D7\_0309200)  
PfARK3 (PF3D7\_1356800)  
PfCDPK1 (PF3D7\_0217500)  
PfCDPK2 (PF3D7\_0610600)  
PfCDPK3 (PF3D7\_0310100)  
PfCDPK4 (PF3D7\_0717500)  
PfCDPK5 (PF3D7\_1337800)  
PfCDPK6 (PF3D7\_1122800)  
PfCDPK7 (PF3D7\_1123100)  
PfCK1.1 (PF3D7\_1136500.2)  
PfCK2alpha (PF3D7\_1108400)  
PfCLK1 (PF3D7\_1445400)  
PfCLK3 (PF3D7\_1114700)  
PfCRK1 (PF3D7\_0417800)  
PfCRK3 (PF3D7\_0415300)  
PfCRK4 (PF3D7\_0317200)  
PfCRK5 (PF3D7\_0615500)  
PfGSK3 (PF3D7\_0312400)  
PfIK1 (PF3D7\_1444500)  
PfKIN (PF3D7\_1454300)  
PfMAPK1 (PF3D7\_1431500)  
PfMAPK2 (PF3D7\_1113900)  
PfMRK (PF3D7\_1014400)  
PfNEK1 (PF3D7\_1228300)  
PfNEK2 (PF3D7\_0525900)  
PfNEK3 (PF3D7\_1201600)  
PfNEK4 (PF3D7\_0719200)  
PfPK1 (PF3D7\_0821100)  
PfPK2 (PF3D7\_1238900)  
PfPK4 (PF3D7\_0628200)  
PfPK5 (PF3D7\_1356900)  
PfPK6 (PF3D7\_1337100)  
PfPK7 (PF3D7\_0213400)  
PfPK9 (PF3D7\_1315100)  
PfPKA (PF3D7\_0934800)  
PfPKB (PF3D7\_1246900)  
PfPKG (PF3D7\_1436600)  
PfPutativeCaMK2 (PF3D7\_1423600)  
PfPutativeK (PF3D7\_0107600)  
PfPutativeK (PF3D7\_0321400)  
PfPutativeK (PF3D7\_0926100)  
PfPutativeK (PF3D7\_1145200)  
PfPutativeK (PF3D7\_1148000)  
PfPutativeK (PF3D7\_1316000)  
PfPutativeK (PF3D7\_1331000)  
PfPutativeK (PF3D7\_1441300)  
PfRIO1 (PF3D7\_1230900)  
PfRIO2 (P3D7\_0420100)  
PfSRPK1 (PF3D7\_0302100)  
PfSRPK2 (PF3D7\_1443000)  
PfTKL1 (PF3D7\_0211700)  
PfTKL2 (PF3D7\_1121300)  
PfTKL3 (PF3D7\_1349300)  
PfTKL4 (PF3D7\_0623800)  
PfVPS15 (PF3D7\_0823000)  
PVX\_091015  
Py02791  
TGGT1\_209050 (TgTKL5)  
TGGT1\_225770 (TgTKL8)  
TGGT1\_234970 (TgTKL2)  
TGGT1\_236240 (TgTKL6)  
TGGT1\_237210 (TgTKL4)  
TGGT1\_239130 (TgTKL7)  
TGGT1\_253860 (TgTKL3)  
TGGT1\_290225  
TGGT1\_301270 (TgTKL1)

-----RNFN-----INHSINNIALKICID-----  
-----NVAIKV-L-----  
-----QT-PVAIKI-----HDL  
-----NIEQI-NECNKY-A-----  
-----KK-----  
-----M-----  
-----CVLKC-I-----  
-----KVALKV-M-----  
-----YAIKK-I-----  
-----KAIV-I-----  
-----YAIKE-E-----  
-----RAVKV-V-----  
-----YAIKV-I-----  
-----RAIKI-I-----  
-----KVKI-L-----  
-----PAIKV-I-----  
-----FAVKL-----  
-----CAIKV-L-----  
-----YAVKV-VR-----  
-----VAVKV-I-----  
-----VALKKLK-----  
-----HVRIKENTRTIDK-----LKYR  
-----YAIKF-FR-----  
-----VAIKK-V-----  
-----IKSEN-I-----  
-----YAIKI-L-----  
-----VAVK-I-----  
-----VAIKK-V-----  
-----VAIKK-M-----  
-----FCWKA-I-----  
-----I-----FVIKE-L-----  
-----I-----  
-----YVMKI-I-----  
-----VWVKE-V-----  
-----TNNKE-----  
-----FALKK-I-----  
-----VAIKKI-I-----  
-----YALKK-Y-----  
-----VALKF-I-----  
-----PVAIKR-F-----  
-----YAMKI-L-----  
-----YALKC-V-----  
-----YAVKI-I-----  
-----INKKH-----  
-----VNNVMLKGWT-----  
-----VAVKVPV-D-----  
-----YAAKL-L-----  
-----YAAKI-----H-----  
-----VAIKR-----  
-----IDKKK-IR-----  
-----VAAKA-I-----  
DDDEKQNFSKREDTVLEEKNSNNTYEQTFDIIKEMNDISFYDNKKSQISHIINILDKTKKKGIALATKV-Y  
-----IHLGRISFRT-I-----  
-----DKIKI-I-----  
-----FD-----IHYSINNTALKIFLN-----  
-----NVAIKV-L-----  
-----V-----  
-----KT-PVAIKI-----HDL  
-----QIFLSI-I-----  
-----  
-----TVAVKQ-A-----  
-----AVAVKW-L-----  
-----LAAKL-----H-----  
-----FALKR-ILC-----  
-----VACKI-VAFPV-----GG  
-----RVAVKV-F-----  
-----ASASRA-TGRPC-----P-----  
-----KRSREEQDAGVRE-----ENAVSE

310 320 330 340 350 360 370 380 390 400

At\_CDPK1  
At\_CTR1  
FIKK1 (PF3D7\_0102600)  
FIKK10.1 (PF3D7\_1016400)  
FIKK10.2 (PF3D7\_1039000)  
FIKK11 (PF3D7\_1149300)  
FIKK12 (PF3D7\_1200800)  
FIKK3 (PF3D7\_0301200)  
FIKK4.1 (PF3D7\_0424500)  
FIKK5 (PF3D7\_0500900)  
FIKK7.1 (PF3D7\_0726200)  
FIKK8 (PF3D7\_0805700)  
FIKK9.1 (PF3D7\_0902000)  
FIKK9.2 (PF3D7\_0902100)  
FIKK9.4 (PF3D7\_0902300)  
FIKK9.5 (PF3D7\_0902400)  
FIKK9.6 (PF3D7\_0902500)  
FIKK9.7 (PF3D7\_0902600)  
Hs\_ABL1  
Hs\_BTK

-----SKRK-----I-----RTAVDI-----  
-----MEQD-----F-----HAEKV-----  
-----EPV-----NNNTN-----  
-----EENY-----EENK-----  
-----D-----GKVN-----  
-----EED-----NKNSS-----  
-----EPY-----RKYIQ-----  
-----EHNK-----RNNAN-----  
-----EPD-----NKYFN-----  
-----SE-----  
-----EPHY-----  
EPFLDYENGENGENGENGDENGENGENGENGENGENGENGENGENGENGVENGENGENGN-----  
-----KEDT-----MEVE-----  
-----KES-----MSED-----

|                                 |         |       |           |
|---------------------------------|---------|-------|-----------|
| Hs_CAMK1                        | AKEA    | L     | EGKE      |
| Hs_CDK2                         | RLDT    |       | ETEGVP    |
| Hs_CK1                          | ESQKARH |       |           |
| Hs_CLK1                         | NVDR    | YC    |           |
| Hs_ERK1                         | -SPF    |       | EHQTYC    |
| Hs_FGFR1                        | KSDA    |       | TEKDL     |
| Hs_GCN2_2                       | NPASRQ  | F     |           |
| Hs_IGFR1                        | NEAA    |       | SMRER     |
| Hs_IRAK1                        | KENAD   | L     | EWTAVK    |
| Hs_JAK2_1                       | KABRN   | YS    |           |
| Hs_LCK                          | KQGS    |       | MSPD      |
| Hs_LYN                          | KPGT    |       | MSVQ      |
| Hs_NEK1                         | NISR    | M     | SSKER     |
| Hs_PAK1                         | KKEL    | I     | IN        |
| PfPK8 (PF3D7_0203100)           | NLKY    | L     | SKKNSL    |
| Hs_PKAca                        | DKQK    | V     | VKLKQI    |
| Hs_RAF1                         | KVVD    |       | PTPEQF    |
| Hs_RIOK1                        | KTSI    | L     | VFKDRD    |
| Hs_RIOK2                        | KNKR    | YK    | HRHNSWL   |
| Hs_RIOK3                        | KITLN   |       | EFKNRD    |
| Hs_VGFR1                        | KEGA    |       | TASEY     |
| PBANKA_0940100                  | KISQ    |       |           |
| PbRIO1 (PBANKA_1445600)         | NTSI    | L     | VFKKRS    |
| PbRIO2 (PBANKA_0521400)         | KNNRD   | YG    | KKKFRNWL  |
| PbTKL1 (PBANKA_0308500)         | KKYS    |       |           |
| PbTKL2 (PBANKA_0927000)         | KKNEN   |       |           |
| PbTKL4 (PBANKA_1122700)         | KDSKN   | L     |           |
| PF3D7_1106800                   | SETK    | Y     | NIKKS     |
| PfABCK1 (PF3D7_0810200)         |         | F     |           |
| PfABCK2 (PF3D7_1414500)         |         | F     |           |
| PfARK1 (PF3D7_0605300)          | SKSH    | L     | VKSTQE    |
| PfARK2 (PF3D7_0309200)          | AKDT    | I     | MSLMIE    |
| PfARK3 (PF3D7_1356800)          | SKDH    | I     | TKSQAA    |
| PfCDPK1 (PF3D7_0217500)         | KKSQ    | F     | DKMKYS    |
| PfCDPK2 (PF3D7_0610600)         | KKDR    | L     | KNI       |
| PfCDPK3 (PF3D7_0310100)         | SKKK    | L     | KNI       |
| PfCDPK4 (PF3D7_0717500)         | SKKH    | V     | KRK       |
| PfCDPK5 (PF3D7_1337800)         | EKKK    | I     | HNI       |
| PfCDPK6 (PF3D7_1122800)         | KKKS    | M     | KHI       |
| PfCDPK7 (PF3D7_1123100)         | DKRS    | V     | SIYEK     |
| PfCK1.1 (PF3D7_1136500.2)       | ESTRSKH |       |           |
| PfCK2alpha (PF3D7_1108400)      | KPVK    |       | K         |
| PfCLK1 (PF3D7_1445400)          | NIKK    | YT    |           |
| PfCLK3 (PF3D7_1114700)          | RDNDM   | MK    |           |
| PfCRK1 (PF3D7_0417800)          | NFSS    | M     | HNEGFA    |
| PfCRK3 (PF3D7_0415300)          |         |       | EDTSS     |
| PfCRK4 (PF3D7_0317200)          | KHSKK   | LK    | KIENKN    |
| PfCRK5 (PF3D7_0615500)          | DDLRT   | I     | NEEGIS    |
| PfGSK3 (PF3D7_0312400)          |         |       | LQDP      |
| PfIK1 (PF3D7_1444500)           | KSEN    | I     | KSEKVK    |
| PfKIN (PF3D7_1454300)           | NKKR    | L     | IEI       |
| PfMAPK1 (PF3D7_1431500)         | FGAF    |       | QNCTDA    |
| PfMAPK2 (PF3D7_1113900)         | NRME    |       | EDLLDC    |
| PfMRK (PF3D7_1014400)           | KLNKIS  | NYI   | DDCGIN    |
| PfNEK1 (PF3D7_1228300)          | SYRG    | L     | KEREK     |
| PfNEK2 (PF3D7_0525900)          | DISC    | M     | NNKEK     |
| PfNEK3 (PF3D7_1201600)          | NEDD    | L     |           |
| PfNEK4 (PF3D7_0719200)          | NISQ    | M     | SQKEK     |
| PfPK1 (PF3D7_0821100)           |         |       |           |
| PfPK2 (PF3D7_1238900)           | DKSK    | V     | KE        |
| PfPK4 (PF3D7_0628200)           | KRKKD   |       |           |
| PfPK5 (PF3D7_1356900)           | RLEK    |       | EDEGIP    |
| PfPK6 (PF3D7_1337100)           | NLCL    |       | ENYGIS    |
| PfPK7 (PF3D7_0213400)           | EKSL    | L     | EKKRDF    |
| PfPK9 (PF3D7_1315100)           | PKSN    | F     | LDV       |
| PfPKA (PF3D7_0934800)           | ECKK    | I     | IRQKV     |
| PfPKB (PF3D7_1246900)           | RKEN    | I     | LSRNQL    |
| PfPKG (PF3D7_1436600)           | SKRS    | I     | INLNQQ    |
| PfPutativeCamK2 (PF3D7_1423600) | KKKK    | K     | HKSYN     |
| PfPutativeK (PF3D7_0107600)     | KHNR    | Y     | HQIKEK    |
| PfPutativeK (PF3D7_0321400)     |         | F     |           |
| PfPutativeK (PF3D7_0926100)     | KMAR    |       | QDPYGLT   |
| PfPutativeK (PF3D7_1145200)     | QFNQ    | F     | PKESFN    |
| PfPutativeK (PF3D7_1148000)     | KIEPS   | M     | SNEIKN    |
| PfPutativeK (PF3D7_1316000)     |         |       | SPKWR     |
| PfPutativeK (PF3D7_1331000)     | TQNK    | II    | ERDNKK    |
| PfPutativeK (PF3D7_1441300)     | DKST    | V     | QDGLLF    |
| PfRIO1 (PF3D7_1230900)          | NTSI    | L     | VFKKRS    |
| PfRIO2 (PF3D7_0420100)          | KNNRD   | YG    | KKCFRNL   |
| PfSRPK1 (PF3D7_0302100)         |         |       |           |
| PfSRPK2 (PF3D7_1443000)         | DFNSC   | I     |           |
| PfTKL1 (PF3D7_0211700)          | KKKN    | I     |           |
| PfTKL2 (PF3D7_1121300)          | KKNEN   |       |           |
| PfTKL3 (PF3D7_1349300)          |         |       |           |
| PfTKL4 (PF3D7_0623800)          | KDSK    | N-L   | KRENVLIQ  |
| PfVPS15 (PF3D7_0823000)         | QLHSLGI | YHGHI |           |
| PVX_091015                      |         |       |           |
| PY02791                         |         |       |           |
| TGGT1_209050 (TgTKL5)           | HGVL    |       | QEARL     |
| TGGT1_225770 (TgTKL8)           | HKPRE   |       | A         |
| TGGT1_234970 (TgTKL2)           | VLSS    | V     | EKESARW   |
| TGGT1_236240 (TgTKL6)           | QEKER   | Y     |           |
| TGGT1_237210 (TgTKL4)           | SPAS    |       | RAPQIR    |
| TGGT1_239130 (TgTKL7)           | RQRELRT | LQ    |           |
| TGGT1_253860 (TgTKL3)           | ETQCR   | VV    | PKLDYFRYC |
| TGGT1_290225                    |         |       |           |

TGGT1\_301270 (TgTKL1)

EEERG-- --KEVHSG--EERAEPWRRETDDEGEADEAGERGEADEACRGDSGEPAPPEY

|                                 | 410    | 420    | 430  | 440   | 450    | 460    | 470  | 480 | 490 | 500  |
|---------------------------------|--------|--------|------|-------|--------|--------|------|-----|-----|------|
| At_CDPK1                        | EDVRR  | EVAI   |      |       |        | MSTLP  | E    | HPN | VV  | LKA  |
| At_CTR1                         | NEFLR  | EVAI   |      |       |        | MKRL   | R    | HPN | IV  | LFG  |
| FIKK1 (PF3D7_0102600)           |        | KYVL   | H    |       | IDRN   |        | NER  | LRE | EVN |      |
| FIKK10.1 (PF3D7_1016400)        |        |        |      |       |        |        |      |     |     |      |
| FIKK10.2 (PF3D7_1039000)        | NNNDE  | KNNK   | KSND | KKS   | SKED   | ND     | DDM  | G   | YHT | G    |
| FIKK11 (PF3D7_1149300)          | ENMFP  | PPYMF  | NEK  | KELN  |        | INN    | LHEF |     |     |      |
| FIKK12 (PF3D7_1200800)          | HDIME  | EYKF   |      |       | KD     |        | IYEF |     |     |      |
| FIKK3 (PF3D7_0301200)           | DCILD  | NEIF   |      |       | YD     |        | LNLF |     |     |      |
| FIKK4.1 (PF3D7_0424500)         |        |        |      |       | KCNN   |        | LKKF |     |     |      |
| FIKK5 (PF3D7_0500900)           | EDSPP  | KSSF   |      |       | EN     |        | IDSF |     |     |      |
| FIKK7.1 (PF3D7_0726200)         | NNVD   | NNNI   | HN   | HKNNI | YCITNS |        | DNKH |     |     |      |
| FIKK8 (PF3D7_0805700)           | EGLSQ  | KSMY   |      |       | NN     |        | LNVF |     |     |      |
| FIKK9.1 (PF3D7_0902000)         | ENVSS  | DYMF   |      |       | SS     |        | LDNF |     |     |      |
| FIKK9.2 (PF3D7_0902100)         | LKGLN  | ELMF   |      |       | CD     |        | IDIF |     |     |      |
| FIKK9.4 (PF3D7_0902300)         | NISTSH | MS     |      |       | KD     |        | IISF |     |     |      |
| FIKK9.5 (PF3D7_0902400)         | FNLSK  | SICFEN |      |       | IND    |        | INIF |     |     |      |
| FIKK9.6 (PF3D7_0902500)         |        |        |      |       |        |        |      |     |     |      |
| FIKK9.7 (PF3D7_0902600)         | ENGNAI | RSY    | ENN  |       | IPN    |        | LNVF |     |     |      |
| Hs_ABL1                         | EFLKE  | AAV    |      |       |        | MKEI   | K    | HPN | LV  | QLL  |
| Hs_BTK                          | EFTEA  | KV     |      |       |        | MMNL   | S    | HEK | LV  | QLY  |
| Hs_CAMK1                        | GSMEN  | EIAV   |      |       |        | LHKI   | K    | HPN | IV  | ALD  |
| Hs_CDK2                         | STAIR  | EISL   |      |       |        | LKEL   | N    | HPN | IV  | KLL  |
| Hs_CK1                          | PQLLY  | ESKL   |      |       |        | YKIL   | Q    | GGV | G   | IPH  |
| Hs_CLK1                         | EAA    | REIQV  |      |       |        | LEHLN  | T    | DPN | S   | TFR  |
| Hs_ERK1                         | QRTLR  | EIQI   |      |       |        | LLRF   | R    | HEN | VI  | GIR  |
| Hs_FGFR1                        | SDLIS  | EEM    |      |       |        | MKMG   | K    | HKN | I   | NLL  |
| Hs_GCN2_2                       | RRIKG  | EVTL   |      |       |        | LSRL   | H    | HEN | IV  | RYN  |
| Hs_IGFR1                        | TEFLN  | EASV   |      |       |        | MKEF   | N    | CHH | V   | VRLL |
| Hs_IRAK1                        | QSFLE  | VEEQ   |      |       |        | LSRF   | R    | HPN | IV  | D    |
| Hs_JAK2_1                       | ESFFE  | AAAM   |      |       |        | MSKL   | S    | HKH | L   | VLY  |
| Hs_LCK                          | AFLA   | EANL   |      |       |        | MQQL   | Q    | HQR | L   | VRL  |
| Hs_LYN                          | AFLA   | EANL   |      |       |        | MKTL   | Q    | HDK | L   | VRL  |
| Hs_NEK1                         | EESR   | REVAV  |      |       |        | LANM   | K    | HPN | IV  | Q    |
| Hs_PAK1                         | EILV   |        |      |       |        | MREN   | K    | NPN | IV  | N    |
| PfPK8 (PF3D7_0203100)           | KNILR  | EVNE   |      |       |        | LKMC   | E    | HPN | VV  | Y    |
| Hs_PKAca                        | EHTLN  | EKR    |      |       |        | LQAV   | N    | FPE | L   | V    |
| Hs_RAF1                         | QAFRN  | EVAV   |      |       |        | LRKT   | R    | HVN | ILL | F    |
| Hs_RIOK1                        | KYVSG  | EFRF   |      |       |        | RHGYC  | K    | GNP | R   | K    |
| Hs_RIOK2                        | LSR    | LSAM   | E    | FAY   |        | MKALY  | E    | R   | K   | P    |
| Hs_RIOK3                        | KYIKD  | DFR    |      |       |        | KDRFS  | K    | NP  | R   | K    |
| Hs_VGFR1                        | KALMT  | ELKI   |      |       |        | LTHIG  | H    | HLN | VV  | L    |
| PBANKA_0940100                  | KKINK  | KLNF   |      |       |        | KAKI   | K    | IN  | R   | P    |
| PbRIO1 (PBANKA_1445600)         | KYIEG  | EFRF   |      |       |        | RNAYTK | N    | TNP | R   | K    |
| PbRIO2 (PBANKA_0521400)         | LSK    | TAATK  | EYAY |       |        | LKALY  | E    | N   | D   | P    |
| PbTKL1 (PBANKA_0308500)         | YDFFS  | ELKI   |      |       |        | LSIL   | R    | HPN | V   | S    |
| PbTKL2 (PBANKA_0927000)         | NGFEN  | ELII   |      |       |        | MSRY   | R    | HNN | L   | S    |
| PbTKL4 (PBANKA_1122700)         | KNFLR  | EIEI   |      |       |        | YKNL   | Q    | RSN | I   | C    |
| PF3D7_1106800                   | NLKN   | NIIS   |      |       |        | HNKPK  | C    | NI  | Q   | M    |
| PfABCK1 (PF3D7_0810200)         | DYFNY  | EPFA   |      |       |        | SASIG  | Q    | VDA | I   | N    |
| PfABCK2 (PF3D7_1414500)         | EYIDK  | EPLA   |      |       |        | SASIG  | Q    | VKA | K   | L    |
| PfARK1 (PF3D7_0605300)          | ALLR   | KREI   | EL   |       |        | QAHL   | K    | HPH | I   | A    |
| PfARK2 (PF3D7_0309200)          | QVLE   | KI     | EIII |       |        | QASL   | K    | HIN | I   | E    |
| PfARK3 (PF3D7_1356800)          | QOAYL  | EAKY   |      |       |        | HSVL   | S    | HVN | I   | K    |
| PfCDPK1 (PF3D7_0217500)         | DDKI   | HEE    | IYNE | EISL  |        | LKSL   | D    | HPN | I   | K    |
| PfCDPK2 (PF3D7_0610600)         | NRFF   | QEI    | EI   |       |        | MKLL   | D    | HPN | I   | V    |
| PfCDPK3 (PF3D7_0310100)         | PRFR   | QEI    | DI   |       |        | MKNL   | D    | HPN | V   | V    |
| PfCDPK4 (PF3D7_0717500)         | ESLL   | REVEL  |      |       |        | LKML   | D    | HIN | I   | M    |
| PfCDPK5 (PF3D7_1337800)         | ERL    | KREI   | LI   |       |        | MKOM   | D    | HPN | I   | K    |
| PfCDPK6 (PF3D7_1122800)         | KINE   | EIN    | V    |       |        | LIYL   | D    | HPN | I   | I    |
| PfCDPK7 (PF3D7_1123100)         | ELLR   | SEI    | SI   |       |        | LRLL   | R    | HPN | V   | I    |
| PfCK1.1 (PF3D7_1136500.2)       | PQLLY  | ESKL   |      |       |        | YKIL   | G    | GGI | G   | V    |
| PfCK2alpha (PF3D7_1108400)      | KKIKR  | EIKI   |      |       |        | LQNL   | N    | GGP | N   | I    |
| PfCLK1 (PF3D7_1445400)          | RSAR   | EADI   |      |       |        | LKKIQ  | N    | DDN | N   | N    |
| PfCLK3 (PF3D7_1114700)          | KAAE   | KEI    | SI   |       |        | LKKLN  | Q    | YD  | K   | N    |
| PfCRK1 (PF3D7_0417800)          | MPSL   | REI    | NI   |       |        | LLQL   | Q    | HDN | L   | S    |
| PfCRK3 (PF3D7_0415300)          | NSSH   | SNC    | S    |       |        |        | S    | S   | S   | S    |
| PfCRK4 (PF3D7_0317200)          | NDYI   | ENW    | DL   |       |        | FLVIE  | K    | C   | S   | L    |
| PfCRK5 (PF3D7_0615500)          | CTTLR  | ELSC   |      |       |        | LKNIG  | R    | HPN | L   | R    |
| PfGSK3 (PF3D7_0312400)          | QYKN   | RELM   | I    |       |        | MKNL   | N    | HIN | I   | I    |
| PfIK1 (PF3D7_1444500)           | NLYI   | EIKY   |      |       |        | FNHY   | K    | KNK | D   | N    |
| PfKIN (PF3D7_1454300)           | DKI    | KEI    | EI   |       |        | HKNI   | N    | HNH | I   | C    |
| PfMAPK1 (PF3D7_1431500)         | QRTFR  | EIIF   |      |       |        | LYEL   | N    | GHN | I   | I    |
| PfMAPK2 (PF3D7_1113900)         | KRILR  | EIT    | I    |       |        | LNRL   | K    | SDY | I   | R    |
| PfMRK (PF3D7_1014400)           | FVLLR  | EIKI   |      |       |        | MKEI   | K    | HKN | I   | M    |
| PfNEK1 (PF3D7_1228300)          | SQLV   | IEV    | NV   |       |        | MREL   | K    | HKN | I   | V    |
| PfNEK2 (PF3D7_0525900)          | MNVV   | EIRA   |      |       |        | LTKM   | S    | HPF | I   | V    |
| PfNEK3 (PF3D7_1201600)          | NKYM   | NELYI  |      |       |        | MNKL   | R    | N   | C   | E    |
| PfNEK4 (PF3D7_0719200)          | RQCL   | KEVEL  |      |       |        | LSKL   | N    | HPF | I   | V    |
| PfPK1 (PF3D7_0821100)           | SNVY   | TEIEV  |      |       |        | LRKV   | M    | HKY | I   | I    |
| PfPK2 (PF3D7_1238900)           | DDIN   | KNEK   |      |       |        | IKSY   | K    | KKT | P   | V    |
| PfPK4 (PF3D7_0628200)           | STTIR  | EIS    | I    |       |        | LKEL   | K    | HSN | I   | V    |
| PfPK5 (PF3D7_1356900)           | KCILR  | ELTI   |      |       |        | LQKI   | K    | HKN | I   | N    |
| PfPK6 (PF3D7_1337100)           | DDFK   | NELQI  |      |       |        | ITDI   | K    | NEY | C   | T    |
| PfPK7 (PF3D7_0213400)           | HRVF   | EIQT   |      |       |        | LRGL   | I    | HNN | I   | K    |
| PfPK9 (PF3D7_1315100)           | DHVF   | SERKI  |      |       |        | LNVI   | N    | HPF | C   | V    |
| PfPKA (PF3D7_0934800)           | EHTK   | VERNI  |      |       |        | LKCV   | S    | HPF | I   | V    |
| PfPKB (PF3D7_1246900)           | NNIK   | LEI    | EI   |       |        | TAEN   | D    | HPF | I   | R    |
| PfPKG (PF3D7_1436600)           | F      | EKMV   | K    | EIKY  |        | LSIM   | S    | HEN | I   | I    |
| PfPutativeCamK2 (PF3D7_1423600) | NGNN   | KETKY  |      |       |        |        | K    | F   | N   |      |
| PfPutativeK (PF3D7_0107600)     | HDLL   | KIR    | TLN  |       |        | YECI   | N    | THL | N   | L    |
| PfPutativeK (PF3D7_0321400)     |        |        |      |       |        |        |      |     |     |      |

PfPutativeK (PF3D7\_0926100)  
 PfPutativeK (PF3D7\_1145200)  
 PfPutativeK (PF3D7\_1148000)  
 PfPutativeK (PF3D7\_1316000)  
 PfPutativeK (PF3D7\_1331000)  
 PfPutativeK (PF3D7\_1441300)  
 PFRIO1 (PF3D7\_1230900)  
 PFRIO2 (P3D7\_0420100)  
 PFSRPK1 (PF3D7\_0302100)  
 PFSRPK2 (PF3D7\_1443000)  
 PFTKL1 (PF3D7\_0211700)  
 PFTKL2 (PF3D7\_1121300)  
 PFTKL3 (PF3D7\_1349300)  
 PFTKL4 (PF3D7\_0623800)  
 Pfvps15 (PF3D7\_0823000)  
 PVX\_091015  
 Py02791  
 TGGT1\_209050 (TgTKL5)  
 TGGT1\_225770 (TgTKL8)  
 TGGT1\_234970 (TgTKL2)  
 TGGT1\_236240 (TgTKL6)  
 TGGT1\_237210 (TgTKL4)  
 TGGT1\_239130 (TgTKL7)  
 TGGT1\_253860 (TgTKL3)  
 TGGT1\_290225  
 TGGT1\_301270 (TgTKL1)

```

-----KRSINWKI-----LAKC-----D-HPN-IIKLCC-----
--RI--VEMFTKEIIN-----LSIC-----Q-CPG-VIKLHK-----
--KI--IQRAEENIIN-----HIHCH-----R-HIF-IVKLEF-----
-----NKVSREVDL-----LKKM-----NGSTN-IVKKS-----
-----EINYEISV-----L-----PYSDI-----ILKKN-----
-----EKLEDEIKI-----SCMM-----N-HPN-VVKTLN-----
-----QYIEGEFRF-----RNAYTK-----NTNPKRMVQWA-----
LSR-----IAATKEAYAY-----LKVLY-----E-NNFFVPEKPHD-----
-----YESDKLEMYI-----QTRSY-----R-SPE-V-----
-----LEYFTELYI-----VSNL-----R-HPN-VTLFLG-----
-----NGFENEIII-----MSRY-----R-HNN-ILSLLG-----
-----KYRNYEAKI-----LYSL-----RECKH-VIKLIG-----
-----KNFLREIEI-----YKNI-----Q-RPN-ICTFYG-----
-----NNMHIFLTDINI-----LNDY-----LYFIPKIRY-----EDERKGRMLKQE-----
-----L-HLN-LPES-----
-----SIAREMNS-----FRAMD-----A-HPH-IVKYLK-----
-----GFEKEVQV-----LSKF-----R-HPH-LVILLG-----
--HI--VKRVQNEIEI-----HKDIL-----P-HPH-IVEMKA-----
-----RVARAEAKL-----MESL-----PPHPN-IVGFFGAAVET-----
--QL--IHDRKELVV-----ISRL-----N-HPN-VGLGRG-----
-----RSFFSELSV-----LCRL-----T-HPN-IAMLLC-----
--PQP--LKHRDYEADI-----LAAL-----QHPN-IISLYG-----
-----
ALKLVPKSEENLPEAEI-----MRSY-----S-HPR-VVPLG-----

```

At\_CDPK1  
 At\_CTR1  
 FIKK1 (PF3D7\_0102600)  
 FIKK10.1 (PF3D7\_1016400)  
 FIKK10.2 (PF3D7\_1039000)  
 FIKK11 (PF3D7\_1149300)  
 FIKK12 (PF3D7\_1200800)  
 FIKK3 (PF3D7\_0301200)  
 FIKK4.1 (PF3D7\_0424500)  
 FIKK5 (PF3D7\_0500900)  
 FIKK7.1 (PF3D7\_0726200)  
 FIKK8 (PF3D7\_0805700)  
 FIKK9.1 (PF3D7\_0902000)  
 FIKK9.2 (PF3D7\_0902100)  
 FIKK9.4 (PF3D7\_0902300)  
 FIKK9.5 (PF3D7\_0902400)  
 FIKK9.6 (PF3D7\_0902500)  
 FIKK9.7 (PF3D7\_0902600)  
 Hs\_ABL1  
 Hs\_BTK  
 Hs\_CAMK1  
 Hs\_CDK2  
 Hs\_CK1  
 Hs\_CLK1  
 Hs\_ERK1  
 Hs\_ERK1  
 Hs\_FGFR1  
 Hs\_GCN2\_2  
 Hs\_IGFR1  
 Hs\_IRAK1  
 Hs\_JAK2\_1  
 Hs\_LCK  
 Hs\_LYN  
 Hs\_NEK1  
 Hs\_PAK1  
 PfPK8 (PF3D7\_0203100)  
 Hs\_PKAcA  
 Hs\_RAF1  
 Hs\_RIOK1  
 Hs\_RIOK2  
 Hs\_RIOK3  
 Hs\_VGFR1  
 PBANKA\_0940100  
 PBRIO1 (PBANKA\_1445600)  
 PBRIO2 (PBANKA\_0521400)  
 PBTCL1 (PBANKA\_0308500)  
 PBTCL2 (PBANKA\_0927000)  
 PBTCL4 (PBANKA\_1122700)  
 PF3D7\_1106800  
 PfABCk1 (PF3D7\_0810200)  
 PfABCk2 (PF3D7\_1414500)  
 PfARK1 (PF3D7\_0605300)  
 PfARK2 (PF3D7\_0309200)  
 PfARK3 (PF3D7\_1356800)  
 PfCDPK1 (PF3D7\_0217500)  
 PfCDPK2 (PF3D7\_0610600)  
 PfCDPK3 (PF3D7\_0310100)  
 PfCDPK4 (PF3D7\_0717500)  
 PfCDPK5 (PF3D7\_1337800)  
 PfCDPK6 (PF3D7\_1122800)  
 PfCDPK7 (PF3D7\_1123100)  
 PfCK1.1 (PF3D7\_1136500.2)  
 PfCK2alpha (PF3D7\_1108400)  
 PfCLK1 (PF3D7\_1445400)  
 PfCLK3 (PF3D7\_1114700)  
 PfCRK1 (PF3D7\_0417800)  
 PfCRK3 (PF3D7\_0415300)  
 PfCRK4 (PF3D7\_0317200)

```

510 520 530 540 550 560 570 580 590 600
...
--SY--EDNEN-----VHL--VMELCE-----GGE--L-FDRIV-----
--AV--TQPPN-----LSI--VTEYLS-----RSS--L-VRLPH-----
-----NNKKGY-----VVM--VCEFF-----GED--I-FDYTI-----
-----NNKKGY-----VI--ISELF-----GED--I-YTYLT-----
-----KNVNGY-----IVI--VSELY-----GQD--L-FQYIN-----
-----NNMDGY-----IVM--VSELF-----GQN--V-FEYIE-----
-----TNINGN-----IVM--ISEYY-----GED--L-PDFNK-----
-----LNNKAN-----VIM--ISELY-----GED--I-PDFIL-----
-----NNKKN-----VVL--IYELF-----GED--V-FKYVK-----
-----DNNCGY-----VVM--VSEYY-----GES--L-FTNLV-----
-----CNVGGN-----IVI--VSEFF-----GED--I-PDFII-----
-----KNLDGN-----IVI--VSELY-----NED--I-LDFID-----
-----RNKKGY-----VVM--IWEFF-----GDD--I-KNYKK-----
-----KMKGY-----VVM--VSEYY-----GQN--L-KEFLH-----
-----MNMIGY-----VVM--ISEFF-----GKD--T-YKYLK-----
-----ILM-----VSESE-----GED--L-ENYLY-----
-----HKSIGN-----IVM--VFEFF-----GED--L-ETIYC-----
--VC--T-REPP-----FYI--ITEFMT-----GED--L-DCFNN-----
--VC--T-KORP-----IFI--ITEYMA-----YGN--L-DYLN-----
--IY--ESGGH-----LYL--IMQLVS-----NGC--L-LNVL-----
--VI--HTENK-----LYL--VFEFLH-----GGE--L-FDRIV-----
--Y--GQEKDY-----NVL--VMDLLGPS-----Q-D--L-KKFDK-----
--WF--E-HHGH-----ICI--VFEELG-----LED--L-FNECS-----
--IL--RASTLEAM--RD--VYI--VQDLME-----LST--YDFI-----
--AC--T-QGQP-----LYV--IVEYAS-----T-D--L-YKLLK-----
GFLAKDD--RAARGQPASDTDGLDSVE-----AAAPPPILSS--SVEWSTSGERSASARFPATGPGSSDDEDDDEHGGV--FSGSFLPASDSESD
--VV--S-QGQP-----TLV--IMELMT-----KGN--L-REYL-----
--YC--A-QNGF-----YCL--VYGFLP-----RGD--L-KSLY-----
--VCV--CGDE-----NIL--VQEFVK-----NGS--L-EDRL-----
--VV--T-QEP-----IYI--ITEYME-----FGS--L-DTYLK-----
--VY--T-REPP-----IYI--ITEYMA-----NGS--L-VDL-----
--SF--EENGs-----LYI--VMDYCE-----KGS--L-LDEL-----
--SY--LVGDE-----LWV--VMEYLA-----GGD--L-FKRINA-----
--SFF--KDNSN-----LYM--VMEVVP-----GGS--L-TDVT-----
--YM--TKDN-----LAI--VTQWCE-----GGT--L-YDLVK-----
--YN--R-----HAV--VMELIN-----GGE--M-FSHLR-----
-----EKEMRNL--IRLNTAEIPCPEPIMLRS--HVLVMSFIG-----GSS--L-YKHLV-----
-----EKEMHNL--ARMQAGIPCPTVVLLKK--HILVMSFIG-----KDD--MPAPL-----
--AC--TKQGGP-----LMV--IVEYCK-----GYP--L-----
--PL--QEDFN-----LYL--EKKK-----HDQ--VPAPKL-----
-----EKEFRNL--RRILIHGLRCPYPLVLS--NFIVMSMLG-----YGN--L-SNYL-----
--LN--R-----PMI--LMSVYN-----KRRKIL--FSYL-----
-----G-IRDP-----QAI--ALEYIP-----NLD--VSCRM-----
--YA--M-NTNY-----PYL--IYEVVS-----GYP--L-----
--IC--I-KHNK-----LML--LLEYVA-----YGS--I-FDIL-----
--PY--Q-KELS-----SYL--KNEKIK-----LGD--L-RTLLFNHY-----
-----IDSRKHKDY-----NVII--KIQEPG-----KGN--L-PNFI-----
-----HTSSH-----VFF--VMEYCS-----RKRKVL--FSYL-----
--YF--EDKTR-----LFL--ILELAN-----V-YESID-----
--CM--QDEEY-----IYH--VLEFCS-----NGD--L-FTYLN-----
--VF--EDKKY-----PYL--VTEFFE-----GGS--V-RNMKQ-----
--TY--ENDNY-----IYL--IMELCS-----KGS--I-YISKN-----
--TF--EDSNQ-----IYL--VMELCT-----GGE--L-REQII-----
--FF--EDNNY-----YYL--VSDVVT-----GRE--L-FDSII-----
--VY--EDNEK-----LYL--VLELCD-----GGE--L-FDKIV-----
--VY--ENVDC-----IYI--VMELCE-----GGE--L-FDEII-----
--II--NTKET-----LYI--SMELVK-----GGE--L-MSRIK-----
--Y--GIEGDF-----TIM--VLDLLGPS-----GGE--L-YDFLL-----
--IV--KDPVT--KT--PSTL--IFEYIN-----LED--L-FTLKN-----
--KFM--YYDH-----MCL--IFEPLGPS-----N-I--D-KTYLY-----
--SI--K-YKNH-----LCL--VFEWM-----L-YEIT-----
--VV--FGKHL--ND-----IYL--VMEYIE-----WGN--L-RIAL-----
--YD--KNKEK--KS-----CWM--VFEVVP-----H-E--L-RMILD-----
-----KKHS-----LFIHQIKCTAQYLPNERID-----F-D--L-SGSELLREERN-----
-----MYYDH--I-RNVKYYVLP-----

```

```

PFCRK5 (PF3D7_0615500) --LISEYINRQILQHYTSYNNHHHHSKLDITPLAADQKPIF--AAVEYCD-----GGD--L-KKLIQ-----
PFGSK3 (PF3D7_0312400) --YY-----YTESFKKN-EKN-----IFLN--VVMFYIP-----Q-T--V-HKVMKY-----
PFIK1 (PF3D7_1444500) --KY-----QNKNN-----LYI--LMEYCP-----GKT--L-REAI-----
PFIKIN (PF3D7_1454300) --VY-----KAKNDN--D-----LYM--ILEYVE-----NGN--L-LTYIY-----
PFMAPK1 (PF3D7_1431500) --VI-----IPEDLLKF-DE-----LYL--IFDFME-----T-D--L-HEVIK-----
PFMAPK2 (PF3D7_1113900) --LI-----CEKY-----LYI--VLEIAD-----S-D--L-KKLEK-----
PFMRK (PF3D7_1014400) --LY-----NKANOK-----INL--VMEIMD-----Y-D--L-SKIIN-----
PFNEK1 (PF3D7_1228300) --RFL-----VEDC-----LYI--LMEFCD-----AGD--L-SRNIOK-----
PFNEK2 (PF3D7_0525900) --AF-----K-ENDT-----LYV--AMDYCI-----NGD--L-GKVIK-----
PFNEK3 (PF3D7_1201600) --YI-----IEGDT-----LSF--ILEFCN-----GGD--L-HSDIL-----
PFNEK4 (PF3D7_0719200) --SY-----YIN-----LRI--VMKCK-----GGD--L-YHYIQ-----
PFPK1 (PF3D7_0821100) --AY-----EQEGF-----VYL--VLEYLK-----S-L--M-YKY-----
PFPK2 (PF3D7_1238900) --IV-----HTKKR-----LLL--QMELCD-----GGE--L-FEYLN-----
PFPK4 (PF3D7_0628200) --VI-----YCKIDEDK-LKGENL-E-NSCLYL--AFEYCD-----GYT--L-RKWLDSTRS-----
PFPK5 (PF3D7_1356900) --VF-----T-NYDE-----LVL--VFEHLD-----Q-D--L-KKLLD-----
PFPK6 (PF3D7_1337100) --II-----HFQNY-----VYI--IYEYME-----I-D--L-FNLIK-----
PFPK7 (PF3D7_0213400) --VN-----KDDSY-----VCL--IMEYAI-----NDS--I-LKFD-----
PFPK9 (PF3D7_1315100) --SF-----QTKQK-----LYL--VLEFVI-----NGD--L-RNYIK-----
PFPKA (PF3D7_0934800) --AF-----KDSKY-----LYF--ILEYCP-----GGE--F-FTFLR-----
PFPKB (PF3D7_1246900) --TF-----EDKNK-----FYF--LTELVT-----GGE--L-FFHLS-----
PFPKG (PF3D7_1436600) --FF-----E-DQDF-----FYI--LFEYCE-----GGE--L-YDAIR-----
PfPutativeCamK2 (PF3D7_1423600) --IF-----IHSY--FD-----LYI--RMEYCKS-----GGE--L-PYKV-----
PfPutativeK (PF3D7_0107600) --GI-----GKEG-----AYV--VSENC-----T-L-RNYI-----
PfPutativeK (PF3D7_0926100) --VIG-----SATN-----LWL--VTKLVN-----GGF--L-FDVL-----
PfPutativeK (PF3D7_1145200) --FVFG-----KGYRI-----WIL--IQDFAN-----GLD--L-HTIK-----
PfPutativeK (PF3D7_1148000) --VF-----QNI-----LLV--GMELCDID-----DGT--L-WKEN-----
PfPutativeK (PF3D7_1316000) --VF-----TESN-----QNI--VFKYMT-----I-D--L-DKYIK-----
PfPutativeK (PF3D7_1331000) --VH-----ETKDK-----LII--IMEYCD-----Y-S--L-GRYRMKQEKR-----
PfPutativeK (PF3D7_1441300) --IL-----EKEFRNL--RRILICGLRCPYVLVRS-NVIVMSMIG-----NGN--I-KKHIS-----
PFRIO1 (PF3D7_1230900) --IN-----R-----HMI--IMS YIK-----AGD--L-TSYVR-----
PFRIO2 (PF3D7_0420100) --LL-----QQNYDR-----KIDIWS-----YIDN-A-CPKM-----
PFSRPK1 (PF3D7_0302100) --YA-----A-INNP-----RAI--VLEYIQ-----GYP--L-----
PFSRPK2 (PF3D7_1443000) --YC-----T-NKNN-----FYL--IYEVYN-----V-----
PFTKL1 (PF3D7_0211700) --VC-----SLREGE-----ESL--ILQPC-----LGC1-L-FEFLT-----
PFTKL2 (PF3D7_1121300) --IC-----I-KSNK-----LML--LLEYA-----YGT--L-FDIL-----
PFTKL3 (PF3D7_1349300) --DIF-----N-----LGI--LILEILLR-----LGD--L-RTLLFNHY-----
PFTKL4 (PF3D7_0623800) --PL-----K-ED----------GGS--L-EKLYI-----
PfvPS15 (PF3D7_0823000) -----L-DPGC-----VGI--VMEYLP-----KGN--L-FNL-----
PVX_091015 -----R-HGKD-----RFL--VYELLS-----DKD--VSYFFLNENCA-----
Py02791 -----EMGNDV-----LAS--ILEFCE-----GGD--L-FDLL-----
TGGT1_209050 (TgTKL5) -----VAA-----TSTTGS--ARE-----VLL--LLELCE-----GGD--V-GMRL-----
TGGT1_225770 (TgTKL8) -----ACTRNP-----ELFM--LTELCA-----GGH--L-LDLL-----
TGGT1_234970 (TgTKL2) -----VV-----SAPL-----YGL--VTEYVP-----GGS--L-FDHLHSGSNKRV-----
TGGT1_236240 (TgTKL6) -----RC-----HLRPGE-----EAL--ITEYCK-----AGS--L-FDLL-----
TGGT1_237210 (TgTKL4) -----RTGED-----RGTGED-----KGS--L-DALVFP-----
TGGT1_239130 (TgTKL7) -----VFEFGF--QMLEDRSKKKVKNN-----TSLCF--LMDIADQS-----SSD--L-----
TGGT1_253860 (TgTKL3) -----610-----620-----630-----640-----650-----660-----670-----680-----690-----700

```

```

At_CDPK1 -----A--R-----GH-----
At_CTR1 -----K--SGAR-----EQ-----
FIKK1 (PF3D7_0102600) -----S--E-----KE-----RMGTE-----
FIKK10.1 (PF3D7_1016400) -----K--Q-----KK-----KNIFA-----
FIKK10.2 (PF3D7_1039000) -----N--K-----NE-----NKEIV-----
FIKK11 (PF3D7_1149300) -----K--R-----QK-----ENNNI-----
FIKK12 (PF3D7_1200800) -----R--E-----TK-----EKS DV-----
FIKK3 (PF3D7_0301200) -----R--E-----TE-----CFNTF-----
FIKK4.1 (PF3D7_0424500) -----N--K-----RK-----EGCFG-----
FIKK5 (PF3D7_0500900) -----K--S-----RR-----KPIIK-----
FIKK7.1 (PF3D7_0726200) -----K--R-----RK-----NIFLK-----
FIKK8 (PF3D7_0805700) -----R--R-----QK-----KYNMK-----
FIKK9.1 (PF3D7_0902000) -----K--M-----RK-----VYKVP-----
FIKK9.2 (PF3D7_0902100) -----S--E-----KE-----NLV-----
FIKK9.4 (PF3D7_0902300) -----K--K-----GG-----IYRDI-----
FIKK9.5 (PF3D7_0902400) -----N--I-----RN-----KKTYK-----
FIKK9.6 (PF3D7_0902500) -----T--V-----NN-----KKIFK-----
FIKK9.7 (PF3D7_0902600) -----R--M-----CI-----KGYST-----
Hs_ABL1 -----R--E-----CN-----RQEVN-----
Hs_BTK -----R--E-----M-----RHRFQ-----
Hs_CAMK1 -----E--K-----GF-----
Hs_CDK2 -----AS--AL-----TG-----
Hs_CLK1 -----K--E-----NGFLP-----
Hs_ERK1 -----S--Q-----Q-----
Hs_FGFR1 -----Q--A-----RR-----PPGLEVCYNPSHNP-----EQ-----
Hs_GC2_2 I-----IFDNEDENSK--SQNQDEDCE-----KN-----GCHSEPS-----
Hs_IGFR1 -----R--S-----L-----RPEMEN--NPVLAP-----
Hs_IRAK1 -----H--C-----QT-----QACPP-----
Hs_JAK2_1 -----K--N-----KN--C-----
Hs_LCK -----K--T-----PS-----GIKLT-----
Hs_LYN -----K--S-----DE-----GGKVL-----
Hs_NEK1 -----OKG--VL-----
Hs_PAK1 -----E-----TC-----
PFPK8 (PF3D7_0203100) -----NY-----GR-----
Hs_PKAcA -----R--I-----GR-----
Hs_RAF1 -----Q--E-----TK-----
Hs_RIOK1 -----K--N-----VQ-----
Hs_RIOK2 -----CQ-----
Hs_RIOK3 -----K--E-----VK-----
Hs_VGFR1 -----K--S-----KRDLFFLNKDAALHMEPKKEMEPGLEQKKPRLDVSTSSSEFASGFGEDKS-----
PBANKA_0940100 -----K--T-----HSYF-----KSKKCDSR-----
PbRIO1 (PBANKA_1445600) -----K--D-----LN-----

```

PbRIO2 (PBANKA\_0521400)  
PbTKL1 (PBANKA\_0308500)  
PbTKL2 (PBANKA\_0927000)  
PbTKL4 (PBANKA\_1122700)  
PF3D7\_1106800  
PfABCK1 (PF3D7\_0810200)  
PfABCK2 (PF3D7\_1414500)  
PfARK1 (PF3D7\_0605300)  
PfARK2 (PF3D7\_0309200)  
PfARK3 (PF3D7\_1356800)  
PfCDPK1 (PF3D7\_0217500)  
PfCDPK2 (PF3D7\_0610600)  
PfCDPK3 (PF3D7\_0310100)  
PfCDPK4 (PF3D7\_0717500)  
PfCDPK5 (PF3D7\_1337800)  
PfCDPK6 (PF3D7\_1122800)  
PfCDPK7 (PF3D7\_1123100)  
PfCK1.1 (PF3D7\_1136500.2)  
PfCK2alpha (PF3D7\_1108400)  
PfCLK1 (PF3D7\_1445400)  
PfCLK3 (PF3D7\_1114700)  
PfCRK1 (PF3D7\_0417800)  
PfCRK3 (PF3D7\_0415300)  
PfCRK4 (PF3D7\_0317200)  
PfCRK5 (PF3D7\_0615500)  
PfGSK3 (PF3D7\_0312400)  
PfIK1 (PF3D7\_1444500)  
PfKIN (PF3D7\_1454300)  
PfMAPK1 (PF3D7\_1431500)  
PfMAPK2 (PF3D7\_1113900)  
PfMRK (PF3D7\_1014400)  
PfNEK1 (PF3D7\_1228300)  
PfNEK2 (PF3D7\_0525900)  
PfNEK3 (PF3D7\_1201600)  
PfNEK4 (PF3D7\_0719200)  
PfPK1 (PF3D7\_0821100)  
PfPK2 (PF3D7\_1238900)  
PfPK4 (PF3D7\_0628200)  
PfPK5 (PF3D7\_1356900)  
PfPK6 (PF3D7\_1337100)  
PfPK7 (PF3D7\_0213400)  
PfPK9 (PF3D7\_1315100)  
PfPKA (PF3D7\_0934800)  
PfPKB (PF3D7\_1246900)  
PfPKG (PF3D7\_1436600)  
PfPutativeCaMK2 (PF3D7\_1423600)  
PfPutativeK (PF3D7\_0107600)  
PfPutativeK (PF3D7\_0321400)  
PfPutativeK (PF3D7\_0926100)  
PfPutativeK (PF3D7\_1145200)  
PfPutativeK (PF3D7\_1148000)  
PfPutativeK (PF3D7\_1316000)  
PfPutativeK (PF3D7\_1331000)  
PfPutativeK (PF3D7\_1441300)  
PfRIO1 (PF3D7\_1230900)  
PfRIO2 (PF3D7\_0420100)  
PfSRPK1 (PF3D7\_0302100)  
PfSRPK2 (PF3D7\_1443000)  
PfTKL1 (PF3D7\_0211700)  
PfTKL2 (PF3D7\_1121300)  
PfTKL3 (PF3D7\_1349300)  
PfTKL4 (PF3D7\_0623800)  
PfVPS15 (PF3D7\_0823000)  
PVX\_091015  
Py02791  
TGGT1\_209050 (TgTKL5)  
TGGT1\_225770 (TgTKL8)  
TGGT1\_234970 (TgTKL2)  
TGGT1\_236240 (TgTKL6)  
TGGT1\_237210 (TgTKL4)  
TGGT1\_239130 (TgTKL7)  
TGGT1\_253860 (TgTKL3)  
TGGT1\_290225  
TGGT1\_301270 (TgTKL1)

-----SH-----  
-----TK-----  
FYN SQN -K- -ENIDFN NLSNMKLN NYNIP -KNK- -YITSLN NYTN  
-K- -N- -KN- -K-  
-K- -T- -HIF -NSQQ- -INDQ-  
-----SD-----  
-----SD-----  
-E- -N- -GP-  
-K- -K- -QP-  
FK -K- -RR-  
-N- -R- -HK-  
-E- -N- -GS-  
-K- -K- -GC-  
-S- -R- -KR-  
-K- -Y- -GS-  
-N- -S- -ES-  
-A- -E- -TR-  
-----RK-----  
-----PK-----  
-R- -NN- -YN- -G-  
-K- -KY- -GN- -GHG-  
-NK- -S- -PS-  
E- -KERY- KY- -A- -NL-  
-LKK- -IEN- -RSFY- -PEMPS-  
-K- -TKIS- -DDQAG-  
YSRN -N- -QA-  
-D- -C- -GFTC-  
-N- -N- -YN-  
-A- -D- -L-  
-T- -P- -IF-  
-RK- -IF-  
CYK -MF- -GK-  
RKE -LE- -TP-  
-----RK----- KLNNEI  
KKK -QN- -TP-  
-N- -N- -GP-  
DKPLHFTYSD -KK-  
VC -E- -GG-  
KH -N- -  
-E- -YF- -FV- -LDK- -NYT-CF-  
-NK- -FN- -GF-  
-R- -N- -KR-  
-K- -L- -RE-  
-K- -L- -GL-  
-K- -N- -KC-  
-N- -TR- -EN-  
-N- -N- -MN- -NDTI  
-KDEKV-  
-N- -N- -LS-  
YH -N- -GP-  
EN -KY- -DR-  
-KN- -V- -QPYIKY-  
-N- -K- -LY-  
-K- -D- -LN-  
-----SH-----  
-----KKIL-----  
-----YK----- -IN-  
YYSKN -K- -ENPE- -LSYINISCVENYL -RKKSSSSCSSTNYTST- -FYKQNI-  
-K- -DE- -KK- -KNSP- YAKS-  
-K- -N- -KN- -K-  
YK -ND- -DNFY- -SGRRKQSG-  
-----  
-Y- -E- -NKVL-  
-Q- -K- -GP-L-  
-----LS-----  
-R- -HN- -GS-  
TGEQASSASRAQASESAQVETR -QDPDDPYRAAVASMLEKRL- -GAET- -RLDGSNAESVSEESGGFWSFLGKFSF- -FPKKEPRVP  
-H- -V- -RRIP-  
-R- -EN- -ER- -RGGPKLWKA-  
-----E- -E- -HE- -KANTC-  
710 720 730 740 750 760 770 780 790 800

At\_CDPK1  
At\_CTR1  
FIKK1 (PF3D7\_0102600)  
FIKK10.1 (PF3D7\_1016400)  
FIKK10.2 (PF3D7\_1039000)  
FIKK11 (PF3D7\_1149300)  
FIKK12 (PF3D7\_1200800)  
FIKK3 (PF3D7\_0301200)  
FIKK4.1 (PF3D7\_0424500)  
FIKK5 (PF3D7\_0500900)  
FIKK7.1 (PF3D7\_0726200)  
FIKK8 (PF3D7\_0805700)  
FIKK9.1 (PF3D7\_0902000)  
FIKK9.2 (PF3D7\_0902100)  
FIKK9.4 (PF3D7\_0902300)  
FIKK9.5 (PF3D7\_0902400)  
FIKK9.6 (PF3D7\_0902500)  
FIKK9.7 (PF3D7\_0902600)  
Hs\_ABL1

Y-TERAAAV -ARTIAE- -VMMCHS- -NG- -VMHR  
L-DERRRLSM -AYDVAK- -GMNYLHN- -RN- -P- -PIVHR  
E-WFEDVKKI -LFKSLK- -LLIRLHD- -VG- -ITHL  
LHSYMKRKKI -LFECLN- -VLRLHD- -AG- -LCHL  
V-SVEEKKKI -MKECLK- -LLIKLHD- -AG- -LAHL  
L-SDREKKKI -LYECLK- -LLIKLHN- -VG- -IAHL  
RNSDEPKKEL -LYKCLR- -LLVRLHS- -AG- -LSHL  
L-NKNKKKKI -LYESLH- -LLVRLHD- -AG- -FSLH  
N-NLEKKKKI -LBECLK- -LITLHE- -TG- -LSHL  
N-RYAKKKKI -IYDSLH- -LLIRLHD- -AG- -LTHL  
I-RRDKIKNI -LHACLK- -LLARLHD- -AG- -LCHL  
I-SNNEKSFY -LYQCLK- -LLIRLHD- -AG- -LSHL  
F-NKSKKKI -LFECLK- -LLDKLHD- -TG- -LSHL  
I-TKERKKI -LFECLK- -LLINKLHD- -AG- -LTHL  
SENERKKI -IHEWIK- -LVSRLHD- -TG- -LSHL  
F-RKNDKKKI -MLECLK- -LLINKLHD- -VG- -ICHL  
S-RKKNKKKL -LFECLK- -LLINKLHD- -AG- -ICHL  
L-GRKAKKKI -MLSCLK- -LLINKLHD- -IG- -LCHL  
-AVLLYLM -ATQISS- -AMEYLEK- -KN- -FIHR



Hs\_BTK -----TQQLLEM-----CKDVCE---AMEYLES--KQ-----FLHR  
Hs\_CAMK1 -Y-TERDASRL-IFQVLD-AVKYLDH--LG-----IVHR  
Hs\_CDK2 -I-PLPLIKSY-LFQLLQ-GLAFCHS--HR-----VLHR  
Hs\_CK1 -F-TMKTIVLML-ADOMIS-RLEVVHT--KN-----FIHR  
Hs\_CLK1 -F-RLDHIRKM-AYQICK-SVNFVLS--NK-----LHTT  
Hs\_ERK1 -L-SNDHICYF-LYQILR-GLKYIHS--AN-----VLHR  
Hs\_FGFR1 -L-SSKDLVSC-AYQVAR-GMEYLHS--KK-----CIHR  
Hs\_GCN2\_2 -V-TTEAVHYLIQMEYCEKSTLRDTIDQGLYRDTVRLNRLREILD-GLAYLHE--KG-----MIHR  
Hs\_IGFR1 -P-SLSKMIQM-AGEIAD-GMAYLNA--NK-----FVHR  
Hs\_IRAK1 -L-SWPQRLDI-LLGTAR-ATQFLHQ--DS--P-----SLHG  
Hs\_JAK2\_1 -I-NILWKLEV-AKQLAW-AMHFLAE--NT-----LIHG  
Hs\_LCK -I-INKLDDM-AAQIAE-GMAFIEE--RN-----YIHR  
Hs\_LYN -L-LPKLIDF-SAQIAE-GMAYIER--KN-----YIHR  
Hs\_NEK1 -F-QEDQILDW-FVQICL-ALKFVHD--RK-----ILHR  
Hs\_PAK1 -M-DEGQIAAV-CRECLQ-ALEFLHS--NQ-----VIHR  
PfPK8 (PF3D7\_0203100) -I-SEDLVYVI-LDDVLAN-GNLYLHN--ECSSP--LIHR  
Hs\_PKAca -F-SEPHARFY-AAQIVL-TFEYLHS--LD-----LIYR  
Hs\_RAF1 -F-QMFQLIDI-ARQTAQ-GMDYLHA--KN-----IIHR  
Hs\_RIOK1 -L-SESKAREL-YLQVIQ-YMRRMYQD--AR-----LVHA  
Hs\_RIOK2 -I-HHVEDPASV-YDEAME-LVCLVHT--SS--PI--VYHR  
Hs\_RIOK3 -L-NSEEMKEA-YYQTLH-LMRQLYHE--CT-----LVHA  
Hs\_VGFR1 -L-DEGQIAAV-I-TMEDLISY-SFQVAR-GMEFLHS--RK-----CIHR  
PBANKA\_0940100 -I-SEDLVYVI-L-SDHQIMKI-IMDITL-ACSYLEK--QK-----VRII  
PbRIO1 (PBANKA\_1445600) -V-SILKWKEL-YIECIC-LIRLLYSI--CK-----LVHA  
PbRIO2 (PBANKA\_0521400) -V-KISNPKFV-IDFLLN-TLKFPAK--SD-----LIHG  
PbTKL1 (PBANKA\_0308500) -I-KILDIKMK-CKDITS-FMSFLHN--KG-----ILHC  
PbTKL2 (PBANKA\_0927000) -L-SESKAREL-LVQIIN-LVCLVHT--SS--PI--VYHR  
PbTKL4 (PBANKA\_1122700) -I-HKQRLEW-AIQMCS-IVHELHS--HN--P-----PIING  
PF3D7\_1106800 -I-ITDVTL-HNR-L-SVQKIMKI-ITDVTL-ACTYLEK--EK-----MSPI  
PfABCK1 (PF3D7\_0810200) -I-K-NLLFNQY--TN-----LILK  
PfABCK2 (PF3D7\_1414500) -IS-TLKKVSWA--FG-----LIDK  
PfARK1 (PF3D7\_0605300) -F-CEKVAEM-LFEIIV-AIRTCBD--KR-----IAHL  
PfARK2 (PF3D7\_0309200) -L-NEBEVALY-VFQIAD-ALSYLHN--FN-----IIHR  
PfARK3 (PF3D7\_1356800) -I-PDELAVKY-FCHVVN-GLYVINO--MG-----IFHR  
PfCDPK1 (PF3D7\_0217500) -F-DECDANI-MKQILS-GCYLHK--HN-----IVHR  
PfCDPK2 (PF3D7\_0610600) -F-TEKNAATI-MKQIFS-ALFYLHS--LN-----IVHR  
PfCDPK3 (PF3D7\_0310100) -F-VETFAEFI-MKQIFS-GNLYLHI--RN-----ICHR  
PfCDPK4 (PF3D7\_0717500) -F-YEIDAARI-IKQILS-VITYMFK--NN-----VYHR  
PfCDPK5 (PF3D7\_1337800) -F-SEVEAYKI-MKQIFS-ALYYCHS--KN-----IMHR  
PfCDPK6 (PF3D7\_1122800) -F-NEVYIKNI-MFQILC-ATAYMHS--NN-----IAHK  
PfCDPK7 (PF3D7\_1123100) -L-SETHANKI-ITQLIK-TYAYLIR--CG-----IIHR  
PfCK1.1 (PF3D7\_1136500.2) -F-SLKTIVMLT-ADQMLN-RLEVVHS--KN-----FIHR  
PfCK2alpha (PF3D7\_1108400) -F-TDKDIRYV-IYQILK-ALFYCHS--QG-----IMHR  
PfCLK1 (PF3D7\_1445400) -F-HIEDIKLY-CIEILK-ALNLYLRK--MS-----LHTT  
PfCLK3 (PF3D7\_1114700) -L-NATAVHCY-TKQLFI-ALRHMCRK--CR-----IMHA  
PfCRK1 (PF3D7\_0417800) -F-TISELKCI-LKQLLS-GNLYLHR--NW-----VMHR  
PfCRK3 (PF3D7\_0415300) -F-SIGEIKNI-FIQLLK-ALDYCHK--NN-----IIHR  
PfCRK4 (PF3D7\_0317200) -L-TEIQTQVV-IYQMLQ-GNLYLHK--YF-----FMHR  
PfCRK5 (PF3D7\_0615500) -L-NLKEAKWL-SFQLLN-GLAYLHN--NK-----MCHR  
PfGSK3 (PF3D7\_0312400) -L-PMFLVKLY-SYQLCR-ALSYLHS--KF-----ICHR  
PfIK1 (PF3D7\_1444500) -R-NEKLIWEL-IKQILK-GISYLHD--MK-----IMHR  
PfKIN (PF3D7\_1454300) -I-NENNARRI-LYQILN-AIEYLHE--IK-----IVHR  
PfMAPK1 (PF3D7\_1431500) -L-EEIHKYVI-IYQLLR-ALKYIHS--GG-----LLHR  
PfMAPK2 (PF3D7\_1113900) -L-TEQHVKTI-LYNLLL-GEKPIHE--SG-----IIHR  
PfMRK (PF3D7\_1014400) -L-TDSQKCI-LLQLLN-GNLYLHK--YY-----FMHR  
PfNEK1 (PF3D7\_1228300) -I-BEHAIDI-TROLHR-ALAYCHN--LKDGPNGERVLR  
PfNEK2 (PF3D7\_0525900) -I-PEKKIKRW-LLQIIM-ATKFDH--KR-----LIHR  
PfNEK3 (PF3D7\_1201600) -Y-TESEFNI-LHQLLN-GMNIHQ--NG-----IIHG  
PfNEK4 (PF3D7\_0719200) -I-KEKRILW-LTQILT-ALKFLHS--NH-----ILHR  
PfPK1 (PF3D7\_0821100) -----  
PfPK2 (PF3D7\_1238900) -Y-TEQVAKKA-MKRVLI--ALEALHS--NG-----VVHR  
PfPK4 (PF3D7\_0628200) -M-NHPEFDL-FKQLIK-GLKDIHA--TC-----FIHR  
PfPK5 (PF3D7\_1356900) -L-ESVTAKSF-LLQLLN-GLAYCHD--RR-----VLHR  
PfPK6 (PF3D7\_1337100) -L-NIKIKIYI-IFELLL-ALSYLHS--NN-----YIHR  
PfPK7 (PF3D7\_0213400) -I-PIQVIKCI-IKSVLN-SFSYLHN--EK-----NICH  
PfPK9 (PF3D7\_1315100) -L-SEKEADHL-FLQIVK-GVYIYHS--KH-----IVHR  
PfPKA (PF3D7\_0934800) -F-PNDVGCYF-AAQIVL-IFEYLQS--LN-----IVYR  
PfPKB (PF3D7\_1246900) -F-SEETAFKY-SSEIIL-AIEYLHD--LN-----IIYR  
PfPKG (PF3D7\_1436600) -L-SKSQAQFY-LGSIIL-AIEYLHE--RN-----IVYR  
PfPutativeCamK2 (PF3D7\_1423600) -L-MESSEALI-VROICC-ALQYLHS--NN-----IIHR  
PfPutativeK (PF3D7\_0107600) -M-NINRNYEI-IQMILL-GLYSLHN--NN-----IMHR  
PfPutativeK (PF3D7\_0321400) -I-SEQSLSTW-LYQIIT-ALLFMEE--HD-----IYHG  
PfPutativeK (PF3D7\_0926100) -L-GIDISLKM-CRQLAE-VNFMVHT--PIKNNK-NVIIHR  
PfPutativeK (PF3D7\_1145200) -S-NMNEAFLY-FIQLLQ-GMNYIQE--MN-----IVHR  
PfPutativeK (PF3D7\_1148000) -I-NELLALCW-IKQILL-GLVYMKNL--PTG--KVHH  
PfPutativeK (PF3D7\_1316000) -I-NPADLKNI-IYQICI-GIKDLHK--ND-----FAHR  
PfPutativeK (PF3D7\_1331000) -HF-NNQLTYKN-LCNIIK-LMCYLDQ--CN-----ICHG  
PfPutativeK (PF3D7\_1441300) -L-DEVSAQYF-FRKIVE-GLKYMFK--NN-----IAHR  
PfRIO1 (PF3D7\_1230900) -F-DILKWKEL-YIECIC-ILRFLFFN--CK-----LVHA  
PfRIO2 (PF3D7\_0420100) -V-QLNNPYKI-IDTLFN-ILVKFAK--AD-----IYHG  
PfSRPK1 (PF3D7\_0302100) -----  
PfSRPK2 (PF3D7\_1443000) -F-DYQNIYRF-IYSIVSYIGPFPPYMIINN--CR-----IPII  
PfTKL1 (PF3D7\_0211700) -M-KLQDIKI-SKDIAT-FMSFLHN--KG-----IMHC  
PfTKL2 (PF3D7\_1121300) -I-TRPKLVKI-LVQIIN-VLCYLHT--SS--PI--VYHR  
PfTKL3 (PF3D7\_1349300) -I-HKQRLEW-FQQVAE-GMNIHT--NQ-----CFHR  
PfTKL4 (PF3D7\_0623800) -L-DEGQIAAV-AIQISC-IVHELHA--HN--P-----PIING  
PfVPS15 (PF3D7\_0823000) -L-TFLKMESEDIED-DKNDVENVHHD-SNDYHNN--EN--YY--NMNHQY  
PVX\_091015 -L-SVQRILKI-TTDVTL-ACSYLEK--HL-----SHPM  
Py02791 -ITL-ITL-ACSYLEK--QK-----IRWL  
TGGT1\_209050 (TgTKL5) -V-AAERRLVL-SRQLTQ-AVHYMHQ--EK-----RMVHR  
TGGT1\_225770 (TgTKL8) -L-SWQRLSL-ALDSAS-ALSHLQH--HS--P--QVYHR  
TGGT1\_234970 (TgTKL2) -L-RESLAEW-TRQILE-ALLYLKRQ--PVG--VIHH  
TGGT1\_236240 (TgTKL6) -L-KEEWIHI-VKEITA-GLAHVHS--QP--TP--VAHR  
TGGT1\_237210 (TgTKL4) -L-BKLRQIQL-ALDLAR-GCQYLAR--VN-----VYHR  
TGGT1\_239130 (TgTKL7) -L-SFSQVAF-ARDICH-GMRYLHE--QG-----VLHC  
TGGT1\_253860 (TgTKL3) -L-SRPKLVQI-FIDVAK-GMAHVHS--RN-----ILHR

TGCT1\_290225  
 TGCT1\_301270 (TgTKL1)

|                                 | 810                                                   | 820                  | 830  | 840  | 850                  | 860   | 870       | 880  | 890  | 900  |
|---------------------------------|-------------------------------------------------------|----------------------|------|------|----------------------|-------|-----------|------|------|------|
|                                 | -----W-----LKHA                                       |                      |      |      |                      |       |           |      |      |      |
|                                 | -----L-DVEFILLI-----LLDTAR-----GMNYLHSPSATK--PH--LLHR |                      |      |      |                      |       |           |      |      |      |
| At_CDPK1                        | -DLKPENFLF                                            | -A                   | -N   | -N   | -K                   | -KENS | -L        | -KA  | -IDF |      |
| At_CTR1                         | -DLKSPNLLV                                            | -D                   | -K   | -K   | -KYT                 | -V    | -KV       | -CDF |      |      |
| FIKK1 (PF3D7_0102600)           | -DLTPENVLI                                            | -T                   | -K   | -N   | -NFD                 | -I    | -RF       | -CDF |      |      |
| FIKK10.1 (PF3D7_1016400)        | -DISPQNILM                                            | -S                   | -Y   | -N   | -NFE                 | -I    | -RL       | -CDL |      |      |
| FIKK10.2 (PF3D7_1039000)        | -DISPENILI                                            | -S                   | -N   | -N   | -NSE                 | -F    | -RL       | -CDL |      |      |
| FIKK11 (PF3D7_1149300)          | -DISLENILM                                            | -T                   | -E   | -N   | -NYE                 | -F    | -LL       | -CDF |      |      |
| FIKK12 (PF3D7_1200800)          | -DLTAENVLI                                            | -T                   | -D   | -D   | -DYD                 | -I    | -RL       | -CDF |      |      |
| FIKK3 (PF3D7_0301200)           | -DLSPENILI                                            | -S                   | -D   | -D   | -KYQ                 | -M    | -LF       | -CDF |      |      |
| FIKK4.1 (PF3D7_0424500)         | -DISPENILI                                            | -G                   | -N   | -N   | -NCE                 | -L    | -KL       | -CDF |      |      |
| FIKK5 (PF3D7_0500900)           | -DFTPENILI                                            | -S                   | -E   | -N   | -NNE                 | -L    | -RL       | -CDL |      |      |
| FIKK7.1 (PF3D7_0726200)         | -DLTPDNILI                                            | -S                   | -K   | -D   | -SMD                 | -L    | -RL       | -CDF |      |      |
| FIKK8 (PF3D7_0805700)           | -DLTPENILI                                            | -S                   | -D   | -D   | -NYE                 | -L    | -RF       | -CDL |      |      |
| FIKK9.1 (PF3D7_0902000)         | -DFTPENILI                                            | -S                   | -D   | -D   | -NFE                 | -F    | -RI       | -CDF |      |      |
| FIKK9.2 (PF3D7_0902100)         | -DISPENILI                                            | -G                   | -E   | -N   | -NYE                 | -M    | -RL       | -CDF |      |      |
| FIKK9.4 (PF3D7_0902300)         | -DISPENTLI                                            | -G                   | -E   | -N   | -NHK                 | -M    | -RL       | -CDF |      |      |
| FIKK9.5 (PF3D7_0902400)         | -DFSIDNILI                                            | -S                   | -K   | -K   | -NGD                 | -M    | -RL       | -CDF |      |      |
| FIKK9.6 (PF3D7_0902500)         | -DFTLDNILI                                            | -S                   | -K   | -K   | -NGD                 | -M    | -RL       | -CDF |      |      |
| FIKK9.7 (PF3D7_0902600)         | -DISLENILM                                            | -Q                   | -D   | -D   | -NYE                 | -M    | -RI       | -CDF |      |      |
| Hs_ABL1                         | -DLAARNCLV                                            | -Q                   | -E   | -D   | -NHL                 | -V    | -KV       | -ADF |      |      |
| Hs_BTK                          | -DLAARNCLV                                            | -N                   | -N   | -D   | -QGV                 | -V    | -KV       | -SDF |      |      |
| Hs_CAMK1                        | -DLKPENFLY                                            | -Y                   | -S   | -S   | -LDEDSK              | -I    | -MI       | -SDF |      |      |
| Hs_CDK2                         | -DLKPQNLLI                                            | -N                   | -N   | -T   | -EGA                 | -I    | -KL       | -ADF |      |      |
| Hs_CK1                          | -DIKPDNIFL                                            | -G                   | -G   | -R   | -HCN                 | -KL   | -FL       | -IDF |      |      |
| Hs_CKL1                         | -DLKPENFLV                                            | -QSD                 | -Y   | -TEA | -YNPKIKRDERT         | -L    | -LNPDIKRV | -VDF |      |      |
| Hs_ERK1                         | -DLKPSNLLI                                            | -N                   | -T   | -T   | -TCD                 | -L    | -KI       | -CDF |      |      |
| Hs_FGFR1                        | -DLAARNVIV                                            | -T                   | -E   | -D   | -DNV                 | -M    | -KI       | -ADF |      |      |
| Hs_GCN2_2                       | -DLKPVNIFL                                            | -D                   | -S   | -S   | -DDH                 | -V    | -KI       | -GDF |      |      |
| Hs_IGFR1                        | -DLAARNCMV                                            | -A                   | -E   | -E   | -DFT                 | -V    | -KI       | -GDF |      |      |
| Hs_IRAK1                        | -DIKSNVLL                                             | -D                   | -E   | -E   | -RLT                 | -P    | -KL       | -GDF |      |      |
| Hs_JAK2_1                       | -NVCANILLITREE                                        | -DR                  | -K   | -K   | -TGN                 | -PP   | -FI       | -KL  | -SDF |      |
| Hs_LCK                          | -DLRAANILV                                            | -S                   | -D   | -D   | -TLS                 | -C    | -KI       | -ADF |      |      |
| Hs_LYN                          | -DLRAANVIV                                            | -S                   | -E   | -E   | -SLM                 | -C    | -KI       | -ADF |      |      |
| Hs_NEK1                         | -DIKSNIFL                                             | -T                   | -K   | -K   | -DGT                 | -V    | -QL       | -GDF |      |      |
| Hs_PAK1                         | -DIKSDNILL                                            | -G                   | -M   | -M   | -DGS                 | -V    | -KL       | -TDF |      |      |
| PfPK8 (PF3D7_0203100)           | -DIKPTNIVL                                            | -S                   | -K   | -K   | -DGI                 | -A    | -KI       | -IDF |      |      |
| Hs_PKAca                        | -DLKPENFLI                                            | -D                   | -I   | -Q   | -QGY                 | -I    | -QV       | -TDF |      |      |
| Hs_RAF1                         | -DMKSNIFL                                             | -H                   | -E   | -E   | -GLT                 | -V    | -KI       | -GDF |      |      |
| Hs_RIOK1                        | -DLSEFNMLY                                            | -H                   | -H   | -H   | -GGG                 | -V    | -YI       | -IDV |      |      |
| Hs_RIOK2                        | -DFNEFNLLI                                            | -D                   | -E   | -E   | -SDH                 | -I    | -TM       | -IDF |      |      |
| Hs_RIOK3                        | -DLSEYNMLW                                            | -V                   | -H   | -H   | -ACK                 | -V    | -WL       | -IDV |      |      |
| Hs_VGFR1                        | -DLAARNILL                                            | -S                   | -E   | -E   | -NNV                 | -V    | -KI       | -CDF |      |      |
| PBANKA_0940100                  | -NLKPTNILL                                            | -D                   | -G   | -G   | -SLN                 | -A    | -KI       | -SDF |      |      |
| PbRIO1 (PBANKA_1445600)         | -DFSEYNLLY                                            | -FYN                 | -H   | -H   | -NEN                 | -I    | -YI       | -IDV |      |      |
| PbRIO2 (PBANKA_0521400)         | -DFNEFNILL                                            | -D                   | -D   | -D   | -NEN                 | -I    | -TI       | -IDF |      |      |
| PbTKL1 (PBANKA_0308500)         | -DLKSPNILL                                            | -S                   | -E   | -E   | -SGE                 | -I    | -KI       | -CDF |      |      |
| PbTKL2 (PBANKA_0927000)         | -DLKSANILL                                            | -D                   | -E   | -E   | -KFN                 | -A    | -KL       | -GDF |      |      |
| PbTKL4 (PBANKA_1122700)         | -DIKTSNILL                                            | -N                   | -N   | -N   | -NMD                 | -L    | -VM       | -CDF |      |      |
| PF3D7_1106800                   | -NLKPTNILL                                            | -D                   | -E   | -E   | -SLN                 | -A    | -KI       | -SDF |      |      |
| PfABCk1 (PF3D7_0810200)         | -NLYIENLCN                                            | -VI                  | -Q   | -Q   | -KE                  | -L    | -KCECDY   |      |      |      |
| PfABCk2 (PF3D7_1414500)         | -NFYFTDFID                                            | -EW                  | -Q   | -Q   | -DS                  | -A    | -SRELNY   |      |      |      |
| PfARK1 (PF3D7_0605300)          | -DLKPENVIV                                            | -N                   | -H   | -H   | -EKK                 | -C    | -KL       | -ADF |      |      |
| PfARK2 (PF3D7_0309200)          | -DLKPDNILI                                            | -H                   | -Y   | -Y   | -SNEHLNINKI          | -Y    | -KYGV     | -KL  | -ADF |      |
| PfARK3 (PF3D7_1356800)          | -DIKENVIV                                             | -D                   | -H   | -H   | -KDN                 | -A    | -KL       | -SDF |      |      |
| PfCDPK1 (PF3D7_0217500)         | -DIKPENVLL                                            | -E                   | -E   | -E   | -NKHSL               | -NI   | -KI       | -VDF |      |      |
| PfCDPK2 (PF3D7_0610600)         | -DLKPENFLF                                            | -Q                   | -S   | -S   | -ENKDSL              | -L    | -KI       | -IDF |      |      |
| PfCDPK3 (PF3D7_0310100)         | -DIKPENFLF                                            | -Y                   | -D   | -D   | -MTPESL              | -I    | -KI       | -IDF |      |      |
| PfCDPK4 (PF3D7_0717500)         | -DLKPENVLL                                            | -E                   | -T   | -T   | -KNKEDMI             | -I    | -KI       | -IDF |      |      |
| PfCDPK5 (PF3D7_1337800)         | -DLKPENVIV                                            | -V                   | -D   | -D   | -NTEDSP              | -I    | -QI       | -IDW |      |      |
| PfCDPK6 (PF3D7_1122800)         | -DLKPENVIV                                            | -K                   | -E   | -E   | -KGGDT               | -L    | -KI       | -IDF |      |      |
| PfCDPK7 (PF3D7_1123100)         | -DIKPENVLL                                            | -T                   | -D   | -D   | -KSRDAQ              | -I    | -KL       | -TDF |      |      |
| PfCK1.1 (PF3D7_1136500.2)       | -DIKPDNILL                                            | -GRG                 | -K   | -K   | -KVT                 | -LI   | -HI       | -IDF |      |      |
| PfCK2alpha (PF3D7_1108400)      | -DVKPHNIMI                                            | -D                   | -H   | -H   | -ENR                 | -Q    | -RL       | -IDF |      |      |
| PfCLK1 (PF3D7_1445400)          | -DLKPENVLL                                            | -D                   | -D   | -D   | -DPYFKSLITVRRVTDKKIQ | -I    | -YRTKST   | -GI  | -KL  | -IDF |
| PfCLK3 (PF3D7_1114700)          | -DLKPDNILL                                            | -N                   | -E   | -E   | -KFN                 | -AL   | -KV       | -CDL |      |      |
| PfCRK1 (PF3D7_0417800)          | -DLKPTNILL                                            | -S                   | -N   | -N   | -KGI                 | -L    | -KI       | -CDF |      |      |
| PfCRK3 (PF3D7_0415300)          | -DIKIANILL                                            | -D                   | -N   | -N   | -NGI                 | -L    | -KL       | -ADF |      |      |
| PfCRK4 (PF3D7_0317200)          | -DIKPANTLIKNIQ                                        | -Y                   | -LSD | -G   | -L                   | -N    | -DPKE     | -WIV | -KI  | -ADF |
| PfCRK5 (PF3D7_0615500)          | -DLKPENVML                                            | -Q                   | -ET  | -ET  | -SNHK                | -Y    | -LL       | -KI  | -GDL |      |
| PfGSK3 (PF3D7_0312400)          | -DLKQNILL                                             | -D                   | -P   | -P   | -RTH                 | -T    | -L        | -KL  | -CDF |      |
| PfIK1 (PF3D7_1444500)           | -DIKSNIFL                                             | -QI                  | -T   | -T   | -DNI                 | -L    | -IA       | -KI  | -GDF |      |
| PfKIN (PF3D7_1454300)           | -DLKPENVLL                                            | -D                   | -N   | -N   | -NNN                 | -V    | -KL       | -IDF |      |      |
| PfMAPK1 (PF3D7_1431500)         | -DIKPSNIVL                                            | -N                   | -S   | -S   | -ECH                 | -I    | -KV       | -ADF |      |      |
| PfMAPK2 (PF3D7_1113900)         | -DLKPANCLL                                            | -N                   | -Q   | -Q   | -DCS                 | -V    | -KI       | -CDF |      |      |
| PfMRK (PF3D7_1014400)           | -DLSPANIFL                                            | -N                   | -K   | -K   | -KGE                 | -V    | -KL       | -ADF |      |      |
| PfNEK1 (PF3D7_1228300)          | -DLKQNIFL                                             | -STGIRHIGKISSQANNLNS | -RPI | -A   | -A                   | -A    | -KI       | -GDF |      |      |
| PfNEK2 (PF3D7_0525900)          | -DLKCNIFL                                             | -D                   | -E   | -E   | -KER                 | -A    | -KI       | -GDF |      |      |
| PfNEK3 (PF3D7_1201600)          | -DLKSTNIFL                                            | -K                   | -D   | -D   | -DNK                 | -I    | -KI       | -GDF |      |      |
| PfNEK4 (PF3D7_0719200)          | -DMKSNLILL                                            | -D                   | -S   | -S   | -DKR                 | -V    | -RL       | -CDF |      |      |
| PfPK1 (PF3D7_0821100)           |                                                       |                      |      |      |                      |       |           |      |      |      |
| PfPK2 (PF3D7_1238900)           | -DLKMNMLL                                             | -E                   | -N   | -N   | -PNDPSS              | -L    | -KI       | -IDF |      |      |
| PfPK4 (PF3D7_0628200)           | -DLKPENFLV                                            | -D                   | -P   | -D   | -TYT                 | -L    | -KI       | -GDL |      |      |
| PfPK5 (PF3D7_1356900)           | -DLKPQNILL                                            | -N                   | -R   | -R   | -EGE                 | -L    | -KI       | -ADF |      |      |
| PfPK6 (PF3D7_1337100)           | -DIKPENFLI                                            | -T                   | -S   | -S   | -EGE                 | -I    | -KL       | -GDL |      |      |
| PfPK7 (PF3D7_0213400)           | -DVKPSNIVL                                            | -D                   | -K   | -K   | -NCR                 | -V    | -KL       | -SDF |      |      |
| PfPK9 (PF3D7_1315100)           | -DLKLENILL                                            | -D                   | -E   | -E   | -KMT                 | -C    | -KI       | -ADF |      |      |
| PfPKA (PF3D7_0934800)           | -DLKPENVLL                                            | -D                   | -K   | -K   | -DGF                 | -I    | -KM       | -TDF |      |      |
| PfPKB (PF3D7_1246900)           | -DLKPENVLL                                            | -D                   | -E   | -E   | -LGH                 | -I    | -RL       | -TDF |      |      |
| PfPKG (PF3D7_1436600)           | -DLKPENVLL                                            | -D                   | -K   | -K   | -QGY                 | -V    | -KL       | -IDF |      |      |
| PfPutativeCaMK2 (PF3D7_1423600) | -DIKAENFLF                                            | -K                   | -N   | -N   | -KNTKN               | -I    | -KL       | -IDF |      |      |
| PfPutativeK (PF3D7_0107600)     | -DLKPSNIFL                                            | -K                   | -D   | -D   | -NNI                 | -V    | -KI       | -GDF |      |      |
| PfPutativeK (PF3D7_0321400)     | -NVNGYCIFF                                            | -K                   | -D   | -E   | -DRK                 | -E    | -RV       | -SLL |      |      |

|                             |                                 |        |      |                         |     |              |            |
|-----------------------------|---------------------------------|--------|------|-------------------------|-----|--------------|------------|
| PfPutativeK (PF3D7_0926100) | -DIKPENLII                      | -D     | -S   | -DWN                    | -I  | -HL          | -CDF       |
| PfPutativeK (PF3D7_1145200) | -DLKPTNILR                      |        | YD   | -NKR                    | -I  | -VI          | -ADF       |
| PfPutativeK (PF3D7_1148000) | CDLKPANLIL                      |        | K    | -DGI                    | -I  | -KI          | -SDF       |
| PfPutativeK (PF3D7_1316000) | -DLKPNLILI                      | -D     | L    | -DSSNIK                 | -I  | -EI          | -CDL       |
| PfPutativeK (PF3D7_1331000) | -NIKPSNLFI                      | -S     | N    | -DGL                    | HI  | -LL          | -GNFIPR--L |
| PfPutativeK (PF3D7_1441300) | -DLKPENIFL                      | -C     | K    | -IQISQKEKTLIRVGLPSCIEYD | -L  | -KI          | -GDF       |
| PfRIO1 (PF3D7_1230900)      | -DFSEYNLLY                      | -FCN   | H    |                         | I   | -YI          | -IDV       |
| PfRIO2 (P3D7_0420100)       | -DYNEFNILV                      | -D     | D    | -DEN                    | -V  | -TI          | -IDF       |
| PfSRPK1 (PF3D7_0302100)     |                                 |        | K    | -SCY                    |     | -KI          | -CDL       |
| PfSRPK2 (PF3D7_1443000)     | -FTKHGLLIL                      | -K     |      |                         |     | -KFTTDN      |            |
| PfTKL1 (PF3D7_0211700)      | -DLKSSNILI                      | -SI    |      | TRD                     | -I  | -KI          | -CDF       |
| PfTKL2 (PF3D7_1121300)      | -DLKSANILI                      | -D     | D    | -QFN                    | -A  | -KL          | -GDF       |
| PfTKL3 (PF3D7_1349300)      | -DLKLSNILL                      | -D     | E    | -NQN                    | -A  | -VI          | -SDF       |
| PfTKL4 (PF3D7_0623800)      | -DIKTSNILI                      | -D     | D    | -DMN                    | -L  | -VM          | -CDF       |
| PfVPS15 (PF3D7_0823000)     | -DYHSDNYKCMRS                   | -NYKEE | -YTN | -DEN                    |     | -KNGEYQKKYVH |            |
| PVX_091015                  | -NLKPTNILL                      | -D     | E    | -ALN                    | -A  | -KI          | -TDF       |
| Py02791                     | -NLKPTNILL                      | -D     | E    | -SLN                    | -A  | -KI          | -SDF       |
| TGGT1_209050 (TgTKL5)       | -DLKTANLIV                      | -D     | G    | -VSG                    | -L  | -KI          | -CDF       |
| TGGT1_225770 (TgTKL8)       | -DIKTANILL                      | -D     | K    | -HNS                    | -A  | -KV          | -ADF       |
| TGGT1_234970 (TgTKL2)       | LDIKPGNVLL                      |        | Q    | -RCK                    | -C  | -KL          | -ADF       |
| TGGT1_236240 (TgTKL6)       | -DLKINVLCCCKNRDSEGRREDKRGDKGGRE |        | E    | -KSEERTGET-PEGKSP       | -L  | -DFSFKL      | -CDF       |
| TGGT1_237210 (TgTKL4)       | -DIKLSNVLITN                    | -DCS   | EGLK | -SGTK                   | PIA | -KL          | -ADF       |
| TGGT1_239130 (TgTKL7)       | -DLKSPNVLL                      | -G     | R    | -RGE                    | -I  | -KL          | -CDF       |
| TGGT1_253860 (TgTKL3)       | -DLKLSNILL                      | -D     | G    | -DTG                    |     | -KV          | -ADF       |
| TGGT1_290225                | NWASPEELLIC                     |        |      |                         |     | -QI          |            |
| TGGT1_301270 (TgTKL1)       | -DLKPANILL                      |        | K    | -DGR                    | -A  | -MV          | -TDF       |

  

|                            |              |                    |  |            |   |                            |                |
|----------------------------|--------------|--------------------|--|------------|---|----------------------------|----------------|
| At_CDPK1                   | GLSV--FFKP   |                    |  |            |   | GDK                        | F              |
| At_CTR1                    | GLSRL        |                    |  | KASTF      |   | LSS                        |                |
| FIKK1 (PF3D7_0102600)      | GKSAP--VYTT  |                    |  | KLRHT      |   | KEMNMI                     |                |
| FIKK10.1 (PF3D7_1016400)   | AKSTP--IYTN  |                    |  | NLRHL      |   | KNMNGTYLF                  |                |
| FIKK10.2 (PF3D7_1039000)   | AKSAP--MYTY  |                    |  | NLRHI      |   | KGDEK                      |                |
| FIKK11 (PF3D7_1149300)     | CKSTP--IYTT  |                    |  | TLRHV      |   | KEMNHICLF                  |                |
| FIKK12 (PF3D7_1200800)     | AKSTP--LYSD  |                    |  | KLRHD      |   | KKKKKKVYLF                 |                |
| FIKK3 (PF3D7_0301200)      | AKSTP--LYSF  |                    |  | KLRHL      |   | KHFEGLYSF                  |                |
| FIKK4.1 (PF3D7_0424500)    | ANSAP--IYTY  |                    |  | NNRHL      |   | KGNKRLRY                   |                |
| FIKK5 (PF3D7_0500900)      | AKSTP--IYTR  |                    |  | KLRHV      |   | QETKGLCLF                  |                |
| FIKK7.1 (PF3D7_0726200)    | AKSTP--MYSN  |                    |  | KLRHL      |   | KESEDSYKF                  |                |
| FIKK8 (PF3D7_0805700)      | SKSTP--IYTY  |                    |  | NLRHI      |   | KDMNRLYLF                  |                |
| FIKK9.1 (PF3D7_0902000)    | CKSTP--LYTN  |                    |  | KIRHI      |   | KKVNTMCSF                  |                |
| FIKK9.2 (PF3D7_0902100)    | CKTTP--LYV   |                    |  | LNNID      |   | EHNKHLQRF                  |                |
| FIKK9.4 (PF3D7_0902300)    | AKSTP--LYTY  |                    |  | YLRHR      |   | KNPGLCLF                   |                |
| FIKK9.5 (PF3D7_0902400)    | SKSTP--KYSY  |                    |  | YLRHT      |   | KKMNLCLF                   |                |
| FIKK9.6 (PF3D7_0902500)    | AKCTP--MYSY  |                    |  | YLRHT      |   | KKMDSLC                    |                |
| FIKK9.7 (PF3D7_0902600)    | AKCTP--RYTY  |                    |  | NLRHI      |   | RNPNGLCFL                  |                |
| Hs_ABL1                    | GLSR--LMT    |                    |  | GDYTT      |   | AHA                        |                |
| Hs_BTK                     | GLSR--YVL    |                    |  | DDEYT      |   | SSV                        |                |
| Hs_CAMK1                   | GLSK--MEDP   |                    |  |            |   | GSV                        | L              |
| Hs_CDK2                    | GLAR--AFGVP  |                    |  | V          |   | -RTY                       |                |
| Hs_CK1                     | GLAKK--YRDNR |                    |  | TRQHI      | P | -YRD                       |                |
| Hs_CLK1                    | GSAT--YDD    |                    |  |            |   | EHH                        |                |
| Hs_ERK1                    | GLAR--IADP   |                    |  |            |   | EHDHTGF-L                  |                |
| Hs_FGFR1                   | GLAR--DIH    |                    |  | HIDYY      |   | KKT                        |                |
| Hs_GCN2_2                  | GLATDHLAFSA  |                    |  | DSKQD      |   | DOTGDLIKSDPS               |                |
| Hs_IGFR1                   | GMTR--DIY    |                    |  | EDYY       |   | RRG                        |                |
| Hs_IRAK1                   | GLAR--FSRFA  |                    |  | GSSPSQSSMV |   | -ART                       |                |
| Hs_JAK2_1                  | GISIT--VLPK  |                    |  |            |   |                            |                |
| Hs_LCK                     | GLAR--LIE    |                    |  | DNEYT      |   | -ARE                       |                |
| Hs_LYN                     | GLAR--VIE    |                    |  | DNEYT      |   | -ARE                       |                |
| Hs_NEK1                    | GIAR--VLNS   |                    |  |            |   | TVELA                      |                |
| Hs_PAK1                    | GFCA--QITP   |                    |  |            |   | EQSK                       | R              |
| PfPK8 (PF3D7_0203100)      | GSCE--ELKN   |                    |  |            |   | SDQS                       |                |
| Hs_PKAc                    | GFAP--RVKG   |                    |  |            |   | R-T                        | W              |
| Hs_RAF1                    | GLAT--V      |                    |  | KSRWS      |   | GSQQV                      |                |
| Hs_RIOK1                   | SQSV         |                    |  |            |   |                            |                |
| Hs_RIOK2                   |              |                    |  |            |   |                            |                |
| Hs_RIOK3                   | SQSV         |                    |  |            |   |                            |                |
| Hs_VGFR1                   | GLAR--DIY    |                    |  | KNPDY      |   | VRK                        |                |
| PBANKA_0940100             | GIKE--IEQ    | CLDINIDYSYIVFPNNVI |  | KFN-NKHF   |   | KNKIKKIKIVNKGS             | EDMLHVFSSKNHNY |
| PbRIO1 (PBANKA_1445600)    | SQSM         |                    |  |            |   |                            |                |
| PbRIO2 (PBANKA_0521400)    |              |                    |  |            |   |                            |                |
| PbTKL1 (PBANKA_0308500)    | GLSI         |                    |  | QNFDN      |   | KPK                        |                |
| PbTKL2 (PBANKA_0927000)    | GLSFI--YIN   |                    |  | NNNIF      |   |                            |                |
| PbTKL4 (PBANKA_1122700)    | QKAR--FKN    |                    |  |            |   | SKL                        |                |
| PF3D7_1106800              | GISK--IEN    | CLDMNIDYSYKISSNSVI |  | KIN-KKEYE  |   | QKKAKKIKIVNKNNNDLLYLDHNNVY |                |
| PfABCk1 (PF3D7_0810200)    |              |                    |  |            |   |                            |                |
| PfABCk2 (PF3D7_1414500)    |              |                    |  |            |   |                            |                |
| PfARK1 (PF3D7_0605300)     | GLSA--HIGS   |                    |  |            |   | KKKKG                      | I              |
| PfARK2 (PF3D7_0309200)     | GFSC--QLKN   |                    |  |            |   | KRQK                       | R              |
| PfARK3 (PF3D7_1356800)     | GLSA--MILG   |                    |  |            |   | KKS                        | H              |
| PfCDPK1 (PF3D7_0217500)    | GLSS--FFSK   |                    |  |            |   | DNK                        | L              |
| PfCDPK2 (PF3D7_0610600)    | GLSK--NLGT   |                    |  |            |   | GEF                        | T              |
| PfCDPK3 (PF3D7_0310100)    | GLAS--YFTH   |                    |  |            |   | NNYE                       | M              |
| PfCDPK4 (PF3D7_0717500)    | GLST--HFY    |                    |  |            |   | SKK                        | M              |
| PfCDPK5 (PF3D7_1337800)    | GFAS--KCMN   |                    |  |            |   | NHN                        | L              |
| PfCDPK6 (PF3D7_1122800)    | GLAE--LINK   |                    |  |            |   | SEGI                       | S              |
| PfCDPK7 (PF3D7_1123100)    | GLST--LCAP   |                    |  |            |   | NEL                        | L              |
| PfCK1.1 (PF3D7_1136500.2)  | GLAKK--YRDSR |                    |  | SHTHI      | P | -YKEG                      |                |
| PfCK2alpha (PF3D7_1108400) | GLAE--FYHPG  |                    |  | QBY        |   |                            |                |
| PfCLK1 (PF3D7_1445400)     | GCAT--FKS    |                    |  |            |   | DYH                        |                |
| PfCLK3 (PF3D7_1114700)     | GSAS--DIS    |                    |  |            |   | ENE                        |                |
| PfCRK1 (PF3D7_0417800)     | GMAR--KFGHV  |                    |  | T          |   | NHNF                       |                |
| PfCRK3 (PF3D7_0415300)     | GLAR--FHSDI  |                    |  | NASNM      |   |                            |                |
| PfCRK4 (PF3D7_0317200)     | GLGVYDHFILKA |                    |  |            |   | ETK                        |                |



PbRIO2 (PBANKA\_0521400) -----PQIV----- -SL  
PbTKL1 (PBANKA\_0308500) ---YLGI VGT YQWTAPEIL R -GE  
PbTKL2 (PBANKA\_0927000) ---NL TGGT PGYADPYI -ST  
PbTKL4 (PBANKA\_1122700) ---Y S NFGS YRYMAPETF S -CTS  
PF3D7\_1106800 KYNTQYIDVTYNNSSYPSIFWTPPEIL R-G -KK  
Pfabck1 (PF3D7\_0810200) -----SHYRCTHDYWSPEQC A -RHQKK  
Pfabck2 (PF3D7\_1414500) ---S TFCG TIDYMPPEII N -QI  
Pfabck3 (PF3D7\_1356800) ---S SLCG TILVYFPEIT S -GT  
PfcDPK1 (PF3D7\_0217500) ---R DR LGTAYIYIAPEVL R -KK  
PfcDPK2 (PF3D7\_0610600) ---T TK AGT PYYVAPQVL D -GK  
PfcDPK3 (PF3D7\_0310100) ---K TK AGT PYYVAPQVL T -GS  
PfcDPK4 (PF3D7\_0717500) ---K DK IG TAYIYIAPEVL H -GT  
PfcDPK5 (PF3D7\_1337800) ---K KSVG T PYYIAPPEIL R -GK  
PfcDPK6 (PF3D7\_1122800) ---K KTA G T VLYMAPEVI K -KK  
PfcDPK7 (PF3D7\_1123100) ---K K EPCG T LAYVAPEVI T -LQ  
PfcK1.1 (PF3D7\_1136500.2) ---K NLTG TARYASNTHL K -GI  
PfcK2alpha (PF3D7\_1108400) ---N VRVAS RYKGPPELLI D -LQ  
PfcCLK1 (PF3D7\_1445400) ---G S IINTRQYRAPEVI L -L  
PfcCLK3 (PF3D7\_1114700) ---I -T S YLVS RFYRAPEII L -GF  
PfcCRK1 (PF3D7\_0417800) ---T KNVVT LWYRAPELL G -EQ  
PfcCRK3 (PF3D7\_0415300) ---T NRVIT LWYRAPELL G -SE  
PfcCRK4 (PF3D7\_0317200) ---D SNIIT LQYRPEIL C -NS  
PfcCRK5 (PF3D7\_0615500) ---T PTVCTI YRPEVL C R -SK  
PfgSK3 (PF3D7\_0312400) ---V S YICSRFYRAPEML G -ST  
Pfik1 (PF3D7\_1444500) ---N PSAGT IHIYISPEQL N -GE  
PfkIN (PF3D7\_1454300) ---L TTSCG SPFYTSPEIL L -GQ  
PfmAPK1 (PF3D7\_1431500) ---T DYVAT RWYRAPELL G -ST  
PfmAPK2 (PF3D7\_1113900) ---T SHVVT RWYRAPELL L -QE  
PfmRK (PF3D7\_1014400) ---L TSKVVT LWYRAPELL C -SN  
PfnEK1 (PF3D7\_1228300) ---H S CVG T PYYWSPPELL -HE -TK  
PfnEK2 (PF3D7\_0525900) ---N TL CGT IGYMAPEIC K -NI  
PfnEK3 (PF3D7\_1201600) ---N NNLG T LNCLSYESI K -K  
PfnEK4 (PF3D7\_0719200) ---N NTLG T PYYLSPEL C K -DK  
PfpK1 (PF3D7\_0821100) ---F S YVCS RYRPELLEF G -SN  
PfpK2 (PF3D7\_1238900) ---N MRCG SPGYVAPEIL K -CA  
PfpK4 (PF3D7\_0628200) ---I -K -G Q IIGT PGYTAPEGG -G -SK  
PfpK5 (PF3D7\_1356900) ---T HEVVT LWYRAPDVL M G -ST  
PfpK6 (PF3D7\_1337100) ---T PTVVT LWYRAPELL K -ST  
PfpK7 (PF3D7\_0213400) ---K GSRGT YEFMPEFF S -NE  
PfpK9 (PF3D7\_1315100) ---K TEAGT KAYIAPEII F -NQT  
PfpKA (PF3D7\_0934800) ---L T LCGT PEYIAPEIL L -NV  
PfpKB (PF3D7\_1246900) ---S SLCG T PEYIAPEII E -GK  
PfpKG (PF3D7\_1436600) ---L T L VGT PPHYMAPEVI L -GK  
PfpPutativeCaMK2 (PF3D7\_1423600) ---T E LCGS PPHYSPELI R -KK  
PfpPutativeK (PF3D7\_0107600) ---K KRKSSNLSY -  
PfpPutativeK (PF3D7\_0321400) ---G NLYGLFYRSPEI R -RK  
PfpPutativeK (PF3D7\_0926100) ---N NVSGAT WIYAPPELL TCHP -LEQSSDYNF  
PfpPutativeK (PF3D7\_1145200) ---T TEWPG TLEINPPEVL R -NT  
PfpPutativeK (PF3D7\_1148000) ---Y YNGG T LLYQPPECL K -NK  
PfpPutativeK (PF3D7\_1316000) ---I P YICSRWYRAPELL C G -SM  
PfpPutativeK (PF3D7\_1331000) ---H HKKNI PKYISPEIFFYL - -NKKIA  
PfpPutativeK (PF3D7\_1441300) ---H D I V G T L S Y A P E V L N -C N N N  
PfrIO1 (PF3D7\_1230900) ---H DHPYSLEF LKRDC L -NI  
PfrIO2 (P3D7\_0420100) -----PQIV----- -SL  
PfsRPK1 (PF3D7\_0302100) ---Y AEIQTRQYRAPEVI L -KS  
PfsRPK2 (PF3D7\_1443000) ---Y YIKKEQL N -QEDD  
PftKL1 (PF3D7\_0211700) ---Y L G I V G T Y Q W T A P E I L R -SE  
PftKL2 (PF3D7\_1121300) ---N L T G G T P G Y A D P Y I -ST  
PftKL3 (PF3D7\_1349300) ---Y Y A I G N L F Y A A P E V L K -GE  
PftKL4 (PF3D7\_0623800) ---Y S N F G S Y R Y M A P E T F S -CTT  
PfvPS15 (PF3D7\_0823000) ---K M N I D K Y K Y Y N P H Y I -NN  
Pvx\_091015 L Y S T E R I V A S P S S A Y P S V S F W T P P E I L R -G -OR  
Py02791 K Y N T R K I D V S S N H D S S V S F W T P P E I L K -R -KQ  
TGGT1\_209050 (TgTKL5) ---G -G -S P R Y M A P E C F A -T -GT  
TGGT1\_225770 (TgTKL8) ---G -G T I G Y A D P K Y I S -SA  
TGGT1\_234970 (TgTKL2) ---W E G G G T L W Y Q P P E C L I P Q R Q R V K R A C T S E D G R N L S P R K R A L S R N P A P P G E P R A A P S T S P R E S R A S R H E A K L R R G G E E D R E E K Q N L  
TGGT1\_236240 (TgTKL6) ---I E R N T T L M Y R P P E M V -DV  
TGGT1\_237210 (TgTKL4) ---A G W A G T V L W M A P E V L A -KQ  
TGGT1\_239130 (TgTKL7) ---E A H L G C V G T H H W M A P E V L R -GE  
TGGT1\_253860 (TgTKL3) ---L A L F G N L F Y A A P E V L R -GD  
TGGT1\_290225 ---H P Q T R -GA  
TGGT1\_301270 (TgTKL1) ---T Q G P G T E G Y I A P E Q R -TA

1110 1120 1130 1140 1150 1160 1170 1180 1190 1200

At\_CDPK1 ---D Y G P G -V D V W S A -G V I I Y I L L -C G V -P P -F -W A -E T  
At\_CTR1 ---P S N E K -S D V Y S F -G V I L W E L A -T L Q -Q P -W -G N L N -  
FIKK1 (PF3D7\_0102600) -----  
FIKK10.1 (PF3D7\_1016400) -----  
FIKK10.2 (PF3D7\_1039000) -----  
FIKK11 (PF3D7\_1149300) NYIKDIE ---E R R K Y Y F D V T S -A D I Y M L -G V L F L R I W -N S K -P L -W L I -A N I E  
FIKK12 (PF3D7\_1200800) -----  
FIKK3 (PF3D7\_0301200) NYITNQD ---K R K D F Y Y D V S N -A D K Y M L -G V F F I W W -N N G -Y L -W S R -S D P E  
FIKK4.1 (PF3D7\_0424500) -----  
FIKK5 (PF3D7\_0500900) NAITVQD ---E R R K H Y F R V T C -A D K Y M L -G I L F I W I W -N D G -H I -W H C -S D A S  
FIKK7.1 (PF3D7\_0726200) -----  
FIKK8 (PF3D7\_0805700) -----  
FIKK9.1 (PF3D7\_0902000) HSIRDTE ---E R R K Y Y F D V T S -A D K Y M L -G I L F I W I W -N D H -H L -W E C -S D P L  
FIKK9.2 (PF3D7\_0902100) -----  
FIKK9.4 (PF3D7\_0902300) RNIEDQE ---E R R K Y Y F D V E C -V D K Y M L -G I M L I W I W -D Y K -Y L -W N K -A D S L  
FIKK9.5 (PF3D7\_0902400) KNMYDDE ---E R R Q Y Y F D V S C -V D K Y M L -G I L F I A I W -N N G -Y L -W Y K -S D P L  
FIKK9.6 (PF3D7\_0902500) -----  
FIKK9.7 (PF3D7\_0902600) KTIIDQD ---E R R K N Y F D V T S -A D N Y M L -G I L F I L I W -V Y H -F F -W N K -A D A S  
Hs\_ABL1 ---K F S I K -S D V W A F -G V L L W E I A -T Y G M -S P -Y -P G I D -

|                                 |                                                                                 |
|---------------------------------|---------------------------------------------------------------------------------|
| Hs_BTK                          | -----KFSK--SDIWF--GVLMWEIY-----SLGK-MP-----Y--ERFT-----                         |
| Hs_CAMK1                        | -----PYSKA--VDCWSI--GVIAIYLL-----CGY-PP-----F--YD-----EN--                      |
| Hs_CDK2                         | -----YYSTA--VDIWSL--GCIFAEMV-----TRR-AL-----F--PG-----DSE--                     |
| Hs_CK1                          | -----EQSRR--DDMESL--GVLMYFN-----RTS-LP-----W--QGLKAA-----TKKQ--                 |
| Hs_CLK1                         | -----GWSQP--CDVWSI--GCILIEYI-----LGF-TV-----F--PTH-----DSKE--                   |
| Hs_ERK1                         | -----GYTKS--LDIWSV--GCILAEML-----SNR-PI-----F--PG-----KHY--                     |
| Hs_FGFR1                        | -----IYTHQ--SDVWSF--GVLLWEIF-----TLGG-SP-----Y--PGVP-----                       |
| Hs_GCN2_2                       | -----KSAYNQ--VDLFSL--GIIFEMS-----Y--HP-----M-----V--TASE--                      |
| Hs_IGFR1                        | -----VFTTY--SDVWSF--GVLLWEIA-----TLAE-QP-----Y--QGLS-----                       |
| Hs_IRAK1                        | -----LAVD--TDFSF--GVVLETL-----AGQ-RA-----V--KTH-----GARTKY                      |
| Hs_JAK2_1                       | -----KNLNLA--TDKWSF--GTLWEIC-----SGGDKP-----L--SAL-----DSQ--                    |
| Hs_LCK                          | -----TFTIK--SDVWSF--GILLTEIV-----THGR-IP-----Y--PGMT-----                       |
| Hs_LYN                          | -----CFTIK--SDVWSF--GILLYEIV-----TYGK-IP-----Y--PGRT-----                       |
| Hs_NEK1                         | -----PYNNK--SDIWAAL--GCVLIELC-----TLK-HA-----F--E-----AGS--                     |
| Hs_PAK1                         | -----AYGPK--VDIWSL--GIMAEMI-----EGE-PP-----Y--LN-----EN--                       |
| PfPK8 (PF3D7_0203100)           | -----NYDCS--SDIWSL--GITIYEIV-----LCT-LP-----W--KR-----NQS--                     |
| Hs_PKAca                        | -----GYNKA--VDWVAL--GVLIYEMA-----AGY-PP-----F--FA-----DQ--                      |
| Hs_RAF1                         | -----PFSFQ--SDVYSY--GIVLYEIM-----TGE-LP-----Y--SHI-----NN--                     |
| Hs_RIOK1                        | -----NDFFMRH--SVAVMTR-----ELFE-----F--VTDPS-----I--TREN--                       |
| Hs_RIOK2                        | -----SHPNAEWYFDRDV-----KC-----                                                  |
| Hs_RIOK3                        | -----SQFFQK--GGVKEALS-----ERE-----LFNAVSGLN-----I--TADN--                       |
| Hs_VGFR1                        | -----IYSTK--SDVWSY--GVLLWEIF-----SLGG-SP-----Y--PGVQ-----                       |
| PBANKA_0940100                  | -----SPSLY--SDVYAY--GIILWEIM-----TNS-VP-----F--NYR-----FK--                     |
| PbRIO1 (PBANKA_1445600)         | ----------TNFFKK-----                                                           |
| PbRIO2 (PBANKA_0521400)         | -----HHENGKMYFERDV-----KCVISHFY-----KK-----Y-----                               |
| PbTKL1 (PBANKA_0308500)         | -----GYTKK--ADIYSF--GVILWELL-----HRT-IP-----F-----ND--                          |
| PbTKL2 (PBANKA_0927000)         | -----HEINEQ--TEIYSF--GALILEML-----VSK-SPAIHVGNKY-----SCIY-----TRNEK--           |
| PbTKL4 (PBANKA_1122700)         | -----EVTEK--LDIWSL--ACCIWEIF-----CSK-YP-----Y--YNF-----SK--                     |
| PF3D7_1106800                   | -----NKKFY--SDIYAF--GILWEML-----SND-IP-----Y--NYP-----FA--                      |
| PfABC1 (PF3D7_0810200)          | -----INEAKY-----YALLKNIIF-----KNSK-Y-----F-----                                 |
| PfABC2 (PF3D7_1414500)          | -----KYELIYH-----QILAYNSF-----KKSQ-IP-----V-----                                |
| PfARK1 (PF3D7_0605300)          | -----KQNFGEFDOK--TDIWTL--GILAFELK-----FGR-PP-----F--GS-----TNE--                |
| PfARK2 (PF3D7_0309200)          | -----PYDCN--VDLWCL--GIVIFELL-----VGF-PP-----F--TD-----DT--                      |
| PfARK3 (PF3D7_1356800)          | -----GYDWR--SDIWSL--GVLYEML-----VGD-VP-----F--DG-----TK--                       |
| PfCDPK1 (PF3D7_0217500)         | -----YNEK--CDVWSC--GVILYILL-----CGY-PP-----F--GG-----QN--                       |
| PfCDPK2 (PF3D7_0610600)         | -----YDKK--CDIWSL--GVIMYILL-----CGY-PP-----F--YG-----DT--                       |
| PfCDPK3 (PF3D7_0310100)         | -----YNNK--CDMWSL--GVLYIILL-----CGY-PP-----F--FG-----ES--                       |
| PfCDPK4 (PF3D7_0717500)         | -----YDEK--CDIWSC--GVILYILL-----SGC-PP-----F--NG-----SN--                       |
| PfCDPK5 (PF3D7_1337800)         | -----YDKR--CDIWSL--GVIMYILL-----CGY-PP-----F--NG-----KN--                       |
| PfCDPK6 (PF3D7_1122800)         | -----FTIK--CDIWSA--GVIMFFLF-----TKS-LP-----F--GG-----NT--                       |
| PfCDPK7 (PF3D7_1123100)         | -----GYNHK--VDANSI--GILLYELL-----SGK-LP-----F--PI-----NK--                      |
| PfCK1_1 (PF3D7_1136500_2)       | -----EQSRR--DDIEAL--GVLMYFL-----RGS-LP-----W--QGLKAI-----SKKD--                 |
| PfCK2alpha (PF3D7_1108400)      | -----LYDYS--LDIWSL--GCMLAGMI-----FKKEPF-----F--CG-----HDN--                     |
| PfCLK1 (PF3D7_1445400)          | -----GWDVS--SDMWSF--GCVLAEIY-----TGS-LL-----F--RTH-----EHME--                   |
| PfCLK3 (PF3D7_1114700)          | -----RYDAQ--IDVWSA--AATVFELA-----TGK-IL-----F--PGKS-----                        |
| PfCRK1 (PF3D7_0417800)          | -----CYTNK--LDIWSA--GCIFAEMI-----LKK-PL-----F--VG-----ENE--                     |
| PfCRK3 (PF3D7_0415300)          | -----NYMAS--VDMWSC--GCVLAELL-----TSN-PL-----F--SA-----ENE--                     |
| PfCRK4 (PF3D7_0317200)          | -----TLYNYS--VDIWSV--GTMCECL-----LGF-VPVT-----SKFE--SSVLFKIL-----VFRGI-PNEN--   |
| PfCRK5 (PF3D7_0615500)          | ----------F-----                                                                |
| PfGSK3 (PF3D7_0312400)          | -----NYTTH--IDLWSL--GCIIAEMI-----LGY-PI-----F--SG-----QSS--                     |
| PfIK1 (PF3D7_1444500)           | -----PFNEK--ADIFSL--GVVFEFEM-----H--EP-----F--ST-----SME--                      |
| PfKIN (PF3D7_1454300)           | -----KYEAL--TDVWSL--GILFLLL-----NHR-LP-----F--NN-----SD--                       |
| PfMAPK1 (PF3D7_1431500)         | -----HYTED--VDMWSL--GCIMGELL-----CGK-PL-----F--TC-----NST--                     |
| PfMAPK2 (PF3D7_1113900)         | -----NYTNS--LDIWSL--GCIFAELMMKSHINNPTNRFPL-----F--PGSSCFPLSPDHNSKKVHEKSN--      |
| PfMRK (PF3D7_1014400)           | -----KYNSS--LDMWSF--GCIFAELL-----LQK-AL-----F--PG-----ENE--                     |
| PfNEK1 (PF3D7_1228300)          | -----SYDDK--SDMVAL--GCIYELC-----SGK-TP-----F--HK-----ANN--                      |
| PfNEK2 (PF3D7_0525900)          | -----NYSFP--ADIWSL--GILLYELI-----SLK-PP-----F--KS-----NNSN--                    |
| PfNEK3 (PF3D7_1201600)          | -----FKSNPK--SDLFQV--GCILYELA-----TLS-SP-----F--CA-----TN--                     |
| PfNEK4 (PF3D7_0719200)          | -----KYSWP--SDVWAT--GCILYELA-----TFR-TP-----F--HS-----TKG--                     |
| PfPK1 (PF3D7_0821100)           | -----YYSQA--IDTWSI--GCVMEILL-----LQK-PL-----F--LG-----ECA--                     |
| PfPK2 (PF3D7_1238900)           | -----SYGTK--VDIFSL--GIVLENIL-----CGY-PP-----F--RC-----NN--                      |
| PfPK4 (PF3D7_0628200)           | -----ALCDEK--ADIYSA--ALILLELL-----CP-----RF--TTI-----MERY--                     |
| PfPK5 (PF3D7_1356900)           | -----KYSTT--LDIWSV--GCIFAEMV-----NGT-PL-----F--PG-----VSE--                     |
| PfPK6 (PF3D7_1337100)           | -----NYDQK--VDIWSL--GCLFELI-----QGR-PL-----F--PG-----KND--                      |
| PfPK7 (PF3D7_0213400)           | -----SSYNGAK--VDIWSL--GICLYVMF-----YNV-VP-----F--SL-----KIS--                   |
| PfPK9 (PF3D7_1315100)           | -----INYSVFK--LDIWSL--GILLFIMT-----QGF-AP-----F-----KY--                        |
| PfPKA (PF3D7_0934800)           | -----GHGKA--ADWWTLL--GIFIYEIL-----VGC-PP-----F--YA-----NE--                     |
| PfPKB (PF3D7_1246900)           | -----GHGKA--VDWWSL--GIMLYEML-----TGE-LP-----F--NN-----TN--                      |
| PfPKG (PF3D7_1436600)           | -----GYGCT--VDIWAAL--GICLYEFL-----CGP-LP-----F--GN-----DEE--                    |
| PfPutativeCamK2 (PF3D7_1423600) | -----YIMS--SDIWAAL--GVVVFEML-----TKG-YP-----F--EG-----KN--                      |
| PfPutativeK (PF3D7_0107600)     | -----EYNIRK--TNILNLQ-----KNN-TP-----FNI-DKY-----                                |
| PfPutativeK (PF3D7_0321400)     | -----LYHDK--NNTWYI--GVLLYLEL-----FGT-YP-----F--I-----SNNV--                     |
| PfPutativeK (PF3D7_0926100)     | -----LDHTKLSYK--WDIWSM--GCVFQEMM-----NLPSP-----F-----QHYII--                    |
| PfPutativeK (PF3D7_1145200)     | -----GMTEK--LDNYAL--GMMMLFI-----SGR-----F--VCR-----QKGI--                       |
| PfPutativeK (PF3D7_1148000)     | -----KNLLITDK--LDIWSL--GCIYEML-----FCE-RP-----F--Q-----FNYLE--                  |
| PfPutativeK (PF3D7_1316000)     | -----FYTTE--VDLWSL--GCIIFELINLC-----PL-----F--PG-----KFKKDEYSEE--               |
| PfPutativeK (PF3D7_1331000)     | -----IVDTK--GKKKPKHIEKYFYKNDIFCL--GLCFYIYI--MMNEDIL-----YYIN-----               |
| PfPutativeK (PF3D7_1441300)     | -----NGYNSEK--ADIWSL--GILLYAML-----FGL-LP-----Y--DS-----EDK--                   |
| PfRIO1 (PF3D7_1230900)          | ----------TNFFKK-----                                                           |
| PfRIO2 (P3D7_0420100)           | -----RHVNARKMYFERDI-----NCVINHEFF-----KK-----Y-----                             |
| PfSRPK1 (PF3D7_0302100)         | -----GFNET--ADIWSF--ACMVFEIV-----TGD-FL-----F--FNPQKGR-----YDKNEE--             |
| PfSRPK2 (PF3D7_1443000)         | -----EEIVFNSN--DFFRLNKKDNLKDL-----KNN-NP-----N--TSTP-----RKR--NNS--             |
| PfTKL1 (PF3D7_0211700)          | -----GYTKK--ADIYSF--GVILWEMI-----HRK-IP-----F-----SD--                          |
| PfTKL2 (PF3D7_1121300)          | -----HEINEQ--TEIYSF--GALILEML-----VSK-SPAIHVGNKY-----NCIY-----SKNEK--           |
| PfTKL3 (PF3D7_1349300)          | -----GFKKE--SDVWSF--AVSLWEAL-----TKK-IA-----Y--DGIS-----                        |
| PfTKL4 (PF3D7_0623800)          | -----EVTEK--LDIWSA--ACCIWEIF-----SSK-YP-----Y--YNL-----TK--                     |
| PfVPS15 (PF3D7_0823000)         | -----VMYNIYI--NDIYNN-----V--SP-----F--SSI-----DYN--                             |
| PVX_091015                      | -----EKPFY--ADVVAL--GIVLWEML-----THS-VP-----F--NYP-----FK--                     |
| Py02791                         | -----NPSLY--SDVYAY--GIVLWEML-----TNS-VP-----F--NYR-----FK--                     |
| TGGT1_209050 (TgTKL5)           | -----LIDEK--ADIWGL--ACCLIEIF-----GGP-IP-----F--EEI-----HS--                     |
| TGGT1_225770 (TgTKL8)           | -----VVTEM--TEVYSF--GMVLELL-----T-A-RP-----P--AVL-----NA--                      |
| TGGT1_234970 (TgTKL2)           | LALADKDLAEFFRALPVIRSVPLNDK--LDIWAAL--GICLYEML-----FNK-RP-----FG--PSPA-----QNT-- |
| TGGT1_236240 (TgTKL6)           | -----YRGLLIGPQ--ADMWML--GICLYEIL-----FFR-HP-----F-----QDA--                     |
| TGGT1_237210 (TgTKL4)           | -----SCTEK--ADVVSF--ATVLYELL-----SNR-IP-----F--EEL-----GQTP--                   |
| TGGT1_239130 (TgTKL7)           | -----PFTAA--ADVYSF--GMVLEWEMV-----ARK-IP-----F--EGM-----NS--                    |
| TGGT1_253860 (TgTKL3)           | -----AFYPA--SDVWSY--GVAFWEAL-----TGT-LA-----Y--EGFP-----                        |

TGGT1\_290225  
TGGT1\_301270 (TgTKL1)

```

-----SDIHAF-----GVILWQMV-----TGL-VPH-----QF-----MS-----
-----AYDRP-----ADVWAF-----GVVCAILL-----GLRE-----W-----KKL-----SDP-----

      1210      1220      1230      1240      1250      1260      1270      1280      1290      1300
.....|.....|.....|.....|.....|.....|.....|.....|.....|.....|.....|
At_CDPK1          -----EQGVA-LAIL-----RGV-----LDFKRDWPQI-----
At_CTR1          -----PAQVV-----AAVGFCKKRL-----
-----
-----EDLNF-SKIF-----EAD-----MNEDKFVIAK-----
-----
-----QDHFV-YELS-----QAD-----MNFNMLERTK-----
-----
-----TDENF-YQFE-----KCD-----MSLDVFQLTS-----
-----
-----TDKNY-MKFE-----KNN-----MSLDTFRVTK-----
-----
-----EDNDF-ILFK-----ENN-----MNLDFIPFTQ-----
-----
-----QDKDY-LKYS-----KSN-----MNFNKEWTF-----
-----
-----VDKEY-AEFA-----RVN-----MDFHKVEKTY-----
-----
-----LSQVY-ELLE-----KDYRMERPE-----
-----
-----NSETA-EHIA-----QGLRLYRPH-----
-----
-----DAKLF-EQIL-----KAE-----YEFDSPYWDDI-----
-----
-----IDQLFRIF-RTLG-----TEDEVVWPGVTSMPTYK-----PSFFPKWARQDF-----SKVVPP-----
-----
-----KYEKISEKKMS-----TEV-----
-----
-----HLAMMERIL-GPLG-----KHMIQ-----KTRRKRKYFHHDRLDWDDEHSSAGRYVSRCKPLKE-----
-----
-----LDQLNHIL-GILG-----SPSQEDLNCTIIMKARNY-----LQSLPSKTKVAV-----AKLFPK-----
-----
-----VEELF-KLLK-----EGHRMDKPS-----
-----
-----RIFVL-NQLR-----DPT-----SPKFPED-----
-----
-----NEQVL-RFVM-----EGGLLDKPD-----
LKDLVEEEAEEAGVALRSTQ-----STLQ-----AG-----LAADAWAAPATAMQIYKHKHLDPR-----
-----
-----RKLQFY-----EDR-----
-----
-----NPEVI-QNLE-----RGYRMVRPD-----
-----
-----NADVM-TALS-----QGYRMPRVE-----
-----
-----MKNLV-LKII-----SGS-----FPPVS-----
-----
-----PLRAL-YLIA-----TNG-----TPELQ--NPEKL-----
-----
-----FENYI-KTII-----NSS-----PKINIT-----EGY-----
-----
-----PIQIY-EKIV-----SGK-----VRFP-----SHF-----
-----
-----RDQII-FMVG-----RGYASPLSKLYK-----
-----
-----MDAYLSKAMEIASQ-----RTKEERS-----SQDHVDEEVFKRAYIPRTL-----
-----
-----EADFL-AEIE-----
-----
-----MDEDFCSRLL-----EGMRMRPE-----
-----
-----SHLL-ASV-----GYAKESL-----PFQ-----
-----
-----KIGYV-----
-----
-----LKHPL-DIIA-----QVGYLNKQLIINN-----
-----
-----CPIHCHRDKNDNDNVFDYLIN-----HINNDYKSIYSILDYS-----
-----
-----NTKIR-HELIV-----NKR-----TPHIPS-----
-----
-----SHIM-AVV-----GYANEEL-----SFN-----
-----
-----YVP-----
-----
-----KIP-----
-----
-----ERENVIM-NRIQ-----DYHWSQL-----FCEKVKQDLIDKL-----
-----
-----QERIF-DQIK-----ELN-----FHFP-----KSV-----
-----
-----TQIV-ESIF-----SCN-----LKFP-----DEV-----
-----
-----DQDII-KKVE-----KCK-----YYFDNDWKNII-----
-----
-----DHEVL-KVKV-----KGE-----FCFYENDWGSII-----
-----
-----DHEIL-SMVK-----KCK-----YQFKGKEWNNI-----
-----
-----EYDIL-KKVE-----AGK-----YTFDLPOFKKI-----
-----
-----NDEIL-KKVE-----KGE-----FVFDSDNYWARV-----
-----
-----YDEVK-QSIF-----RDE-----PDYKSLK-SKL-----
-----
-----NTEM-NIQ-----KNY-----VLSFKDYIWKSI-----
-----
-----KYDKIMEKKIS-----TSV-----
-----
-----YDQLVQIA-KVLG-----TEDLHAYLKKYNIKIKPH-----YLNILGEYERKFW-----SHFLTQ-SN-----
-----
-----HLAMESII-QPIP-----KNMLY-----EATKTNGSKYVKNDELKLAWPENAS--SINSIKHVKKCLP-----
-----
-----NNHMI-KLMM-----
-----
-----IDQLFKIIL-CLLG-----LPDKESYPEFYESFISK-----NKELFKKKIKIMV-----NNIRSHFPNIAN-----
-----
-----TDILKIIY-NKLG-----FPNERDI-----
-----
-----FDDLKKEFI-----GELPKFKIDRLKMLQII-----
-----
-----VDQLVRII-QVLG-----TPTEDQLKEMNPNYAD-----IKFPDVKSKDL-----RKVFPK-----
-----
-----RSIFL-SNLL-----KGI-----YPEYMK-----
-----
-----MKNLF-TQII-----KGI-----LYFQ-----PYV-----
-----
-----MNQLEKII-QVIG-----KFNKKDIEDIRSPFAEKI-----ISSFVDLKKKNL-----KDICYK-----
-----
-----RDQLNIIF-NVIG-----TPPEEDLKCIITQEVIKY-----IKLFPTRDGLDL-----SKKYSS-----
-----
-----IDQLGKIF-FLLG-----TPNENNWPEALCLPLYT-----EFTKAKKDF-----KTYFKI-----
-----
-----FAQLI-SELK-----RGP-----ELPIK-----GK-----
-----
-----MLSYA-QKIC-----EDE-----PDLPL-----DSF-----
-----
-----INDMI-SLFE-----DKN-----YKSYIKNISSIY-----
-----
-----IQQLC-YNIR-----YAP-----IPDLP-----
-----
-----SDQLVEII-KILG-----TPNDEDFLSFRSVYKN-----IKFPDIKPIITL-----EKVIRH-----
-----
-----VKEIF-KKNM-----RCH-----ISFNKIHWINK-----
-----
-----KRLN-----DF-----YTVVDYVKIHLNFWYI-----
-----
-----ADQLMRIF-RILG-----TPNSKNWPNVTELPKYD-----PNEFTVYEPLEW-----ESFLKG-----
-----
-----CTQLELII-LLLG-----DKDKLTTVDKERRKDMFP-----YFEINMLKD-----AI-----
-----
-----LVLEL-NNIR-----TKN-----IEYPLDRNHFLYPLTN-----KKSTCSN-----
-----
-----MEKEL-KNFE-----SNT-----LNVA-----NDI-----
-----
-----PLLIY-QKIL-----EGI-----IYFP-----KEL-----
-----
-----RNVLV-ESIK-----YQK-----LNYP-----KNL-----
-----
-----DQLEIF-RDIL-----TQC-----LTFP-----DVV-----
-----
-----TPKVV-DEIL-----NKN-----INWKGKCFSSL-----
-----
-----NNNII-----

```

PfPutativeK (PF3D7\_0321400)  
 PfPutativeK (PF3D7\_0926100)  
 PfPutativeK (PF3D7\_1145200)  
 PfPutativeK (PF3D7\_1148000)  
 PfPutativeK (PF3D7\_1316000)  
 PfPutativeK (PF3D7\_1331000)  
 PfPutativeK (PF3D7\_1441300)  
 PfRIO1 (PF3D7\_1230900)  
 PfRIO2 (PF3D7\_0420100)  
 PfsRSPK1 (PF3D7\_0302100)  
 PfsRSPK2 (PF3D7\_1443000)  
 PfTKL1 (PF3D7\_0211700)  
 PfTKL2 (PF3D7\_1121300)  
 PfTKL3 (PF3D7\_1349300)  
 PfTKL4 (PF3D7\_0623800)  
 PfVPS15 (PF3D7\_0823000)  
 PVX\_091015  
 Py02791  
 TGGT1\_209050 (TgTKL5)  
 TGGT1\_225770 (TgTKL8)  
 TGGT1\_234970 (TgTKL2)  
 TGGT1\_236240 (TgTKL6)  
 TGGT1\_237210 (TgTKL4)  
 TGGT1\_239130 (TgTKL7)  
 TGGT1\_253860 (TgTKL3)  
 TGGT1\_290225  
 TGGT1\_301270 (TgTKL1)

At\_CDPK1  
 At\_CTR1  
 FIKK1 (PF3D7\_0102600)  
 FIKK10.1 (PF3D7\_1016400)  
 FIKK10.2 (PF3D7\_1039000)  
 FIKK11 (PF3D7\_1149300)  
 FIKK12 (PF3D7\_1200800)  
 FIKK3 (PF3D7\_0301200)  
 FIKK4.1 (PF3D7\_0424500)  
 FIKK5 (PF3D7\_0500900)  
 FIKK7.1 (PF3D7\_0726200)  
 FIKK8 (PF3D7\_0805700)  
 FIKK9.1 (PF3D7\_0902000)  
 FIKK9.2 (PF3D7\_0902100)  
 FIKK9.4 (PF3D7\_0902300)  
 FIKK9.5 (PF3D7\_0902400)  
 FIKK9.6 (PF3D7\_0902500)  
 FIKK9.7 (PF3D7\_0902600)  
 Hs\_ABL1  
 Hs\_BTK  
 Hs\_CAMK1  
 Hs\_CDK2  
 Hs\_CK1  
 Hs\_CLK1  
 Hs\_ERK1  
 Hs\_FGFR1  
 Hs\_GCN2\_2  
 Hs\_IGFR1  
 Hs\_IRAK1  
 Hs\_JAK2\_1  
 Hs\_LCK  
 Hs\_LYN  
 Hs\_NEK1  
 Hs\_PAK1  
 PfPK8 (PF3D7\_0203100)  
 Hs\_PKAcA  
 Hs\_RAF1  
 Hs\_RIOK1  
 Hs\_RIOK2  
 Hs\_RIOK3  
 Hs\_VGFR1  
 PBANKA\_0940100  
 PbrIO1 (PBANKA\_1445600)  
 PbrIO2 (PBANKA\_0521400)  
 PbtKL1 (PBANKA\_0308500)  
 PbtKL2 (PBANKA\_0927000)  
 PbtKL4 (PBANKA\_1122700)  
 PF3D7\_1106800  
 PfABCK1 (PF3D7\_0810200)  
 PfABCK2 (PF3D7\_1414500)  
 PfARK1 (PF3D7\_0605300)  
 PfARK2 (PF3D7\_0309200)  
 PfARK3 (PF3D7\_1356800)  
 PfCDPK1 (PF3D7\_0217500)  
 PfCDPK2 (PF3D7\_0610600)  
 PfCDPK3 (PF3D7\_0310100)  
 PfCDPK4 (PF3D7\_0717500)  
 PfCDPK5 (PF3D7\_1337800)  
 PfCDPK6 (PF3D7\_1122800)  
 PfCDPK7 (PF3D7\_1123100)  
 PfCK1.1 (PF3D7\_1136500.2)  
 PfCK2alpha (PF3D7\_1108400)  
 PfCLK1 (PF3D7\_1445400)  
 PfCLK3 (PF3D7\_1114700)  
 PfCRK1 (PF3D7\_0417800)  
 PfCRK3 (PF3D7\_0415300)



|                                 |                                       |                                      |
|---------------------------------|---------------------------------------|--------------------------------------|
| PfCRK4 (PF3D7_0317200)          | -FTDIYGRRLSDEGLDLIDQFLSYDYKN--RI----  | TANEALKH-----KWF-----                |
| PfCRK5 (PF3D7_0615500)          |                                       | ELSNKHHKSHA-----                     |
| PfGSK3 (PF3D7_0312400)          | GTPEAINLITQFLKYEPFK--RL----           | NPIEALAD-----PFF-----                |
| PfIK1 (PF3D7_1444500)           | ADNKKFQFLSSLLAINPQE--RC----           | CAYNLLHE-----SVL-----                |
| PfKIN (PF3D7_1454300)           | SKNAKHLQNMNVNPKK--RF----              | TMNKIKNH-----IWF-----                |
| PfMAPK1 (PF3D7_1431500)         | ASNESLDLLEKLLQFNPSK--RI----           | SAENALKH-----KYV-----                |
| PfMAPK2 (PF3D7_1113900)         | ISKEGIDLLESMLRFAQK--RI----            | TIDKALSH-----PYL-----                |
| PfMRK (PF3D7_1014400)           | DDDCIDLLTSFLKNAHE--RI----             | SAEDAMKH-----RYF-----                |
| PfNEK1 (PF3D7_1228300)          | SKELNLLIKNLLNSAKE--RP----             | SALQCLGY-----QII-----                |
| PfNEK2 (PF3D7_0525900)          | SKDLINLCYWMKKDWDK--RP----             | TIYDIIST-----DYI-----                |
| PfNEK3 (PF3D7_1201600)          | SQKLVNVISKLLSLNTE--RL----             | EV-----                              |
| PfNEK4 (PF3D7_0719200)          | NIYSKELNNIYKSMILREPSY--RA----         | TVQQLVVS-----DIV-----                |
| PfPK1 (PF3D7_0821100)           | NCSESLDLLSELLQFNPK--RI----            | KLCHALLH-----NYF-----                |
| PfPK2 (PF3D7_1238900)           | SESVKEIILWMCKKNPDD--RC----            | TALQALGH-----QWF-----                |
| PfPK4 (PF3D7_0628200)           | LMLQMSKPNPAD--RP----                  | SADVYSKI-----                        |
| PfPK5 (PF3D7_1356900)           | LDESGIDLLSKMLKLDPNQ--RI----           | TAKQALEH-----AYF-----                |
| PfPK6 (PF3D7_1337100)           | DDEHTLDDLISKMLIYDPNY--RI----          | SSKEALKH-----PCF-----                |
| PfPK7 (PF3D7_0213400)           | NFLSNEDIDFLKFLRKNPAB--RI----          | TSEDALKH-----EWL-----                |
| PfPK9 (PF3D7_1315100)           | SDDLKDLISLMLNVDPNK--RP----            | IIVEILNH-----RWF-----                |
| PfPKA (PF3D7_0934800)           | DNNCKHMLKLLSHDLTK--RYG--NLKKGAGNVKEH  | -----PWF-----                        |
| PfPKB (PF3D7_1246900)           | SPKAVDLLTKLEKFNPKK--RLG--SGGTDAQEIKKH | -----PFF-----                        |
| PfPKG (PF3D7_1436600)           | TDTDSINLMKRLLCRLPQG--RIG--CSINGFKDIKH | -----PFF-----                        |
| PfPutativeCamK2 (PF3D7_1423600) | SIEAVDFLKRLLERNEKK--RL----            | TAYQALHH-----PWI-----                |
| PfPutativeK (PF3D7_0107600)     | RKKKEILFKNCCCKNNIPT--KE--I-----       | -----                                |
| PfPutativeK (PF3D7_0321400)     | SPFVLDFLKALEKNYVK--RP----             | TLKELLKH-----PWI-----                |
| PfPutativeK (PF3D7_0926100)     | KIENSPFADIRLCLNYPNL--RP----           | TASEIVQL-----L-----                  |
| PfPutativeK (PF3D7_1145200)     | RENKAWDLFVKLTSSNPIE--RL----           | SLQNVLDH-----                        |
| PfPutativeK (PF3D7_1148000)     | KISNATLSYIQLNFDYEL--RP----            | SIEEALSY-----PIF-----                |
| PfPutativeK (PF3D7_1316000)     | EKELINIIDGLLKNPNE--RL----             | NIDAVLSN-----PYF-----                |
| PfPutativeK (PF3D7_1331000)     | ITKPELFSVRSMLIYVKQ--RP----            | DWSALAQII-----                       |
| PfPutativeK (PF3D7_1441300)     | STSVRSLLLAMLNINPQN--RL----            | SLDEVMKH-----EWL-----                |
| PfRIO1 (PF3D7_1230900)          |                                       | TOPTNLYTQ-----                       |
| PfRIO2 (PF3D7_0420100)          |                                       | KI-----KIQEYPL-----                  |
| PfSRPK1 (PF3D7_0302100)         | YNLPEKEISPLCSFLLPMSVDPQT--RP----      | SAYTMLQH-----PWL-----                |
| PfSRPK2 (PF3D7_1443000)         | ISDTLFDVFLSSLLQIDPSK--RC----          | NAMEALKH-----PWL-----                |
| PfTKL1 (PF3D7_0211700)          | NIPDQLKYILHSCLHKNPHK--RK----          | SFLWSEY-----                         |
| PfTKL2 (PF3D7_1121300)          | VNFPDFLVEKLTLSFLCLNPNIKK--RP----      | SKLVN-----                           |
| PfTKL3 (PF3D7_1349300)          | LPIPKDIPMELSELKSMLEYDFTK--RP----      | LFNVIARKL-----                       |
| PfTKL4 (PF3D7_0623800)          | FLPNSIKKCLQKCFSPQPED--RP----          | TAYEMYKS-----L-----                  |
| PfVPS15 (PF3D7_0823000)         | THNIKEQLNDDFQENIKYNDKNIYRQ--RP----    | KQNEQVTKKKSQG-----                   |
| PVX_091015                      | DIPPEIQGLIKSCVHRNMKYK--RP----         | TFGHILAVLSR-----LYEKANTKCEDALMSFMDGT |
| Py02791                         | NIPPFIKNLKSCVNRNMKYK--RP----          | TFDRILIELSM-----IYEKINPKCEDALMSFMDG- |
| TGGT1_209050 (TgTKL5)           | AVPSWFHFAARRLPERCFWSPRE--RP----       | SALEIARTLE-----LF-----               |
| TGGT1_225770 (TgTKL8)           | RFPPLHAQSLAALAFSQAQDERE--RP----       | PFRSIVQQL-----QLL-----               |
| TGGT1_234970 (TgTKL2)           | HSGDENEPSDACLDLLARLLSYDPSG--RP----    | TVEEALCH-----PFF-----                |
| TGGT1_236240 (TgTKL6)           | KYSEELIDLHWHLLSADPNQ--RP----          | TSAQLSLLD-----SSI-----               |
| TGGT1_237210 (TgTKL4)           | DLEPEGLRDLMESCWROEPAN--RP----         | PFTHIVKALEII-----                    |
| TGGT1_239130 (TgTKL7)           | PSPPFLREILERCLSPPSQN--RP----          | SFAWCAQQLO-----SLY-----              |
| TGGT1_253860 (TgTKL3)           | LHIPSDFPPFLRFLMSRILAFEPSE--RP----     | SFEVAQALTDLQANALSEIERLDDEF-----      |
| TGGT1_290225                    | HVPFSLRVLRCCTHPDRL--RP----            | SFHQIVSL-----                        |
| TGGT1_301270 (TgTKL1)           | LKDAFLINLCLACLERPLM--RP----           | TFHQIVRLID-----KIF-----              |

## Supporting Information 5 – MAFFT Alignment – PfpTKL orthologs and homologs

|                  | 10 | 20    | 30    | 40    | 50    | 60    | 70           | 80    | 90               | 100       |       |       |       |       |       |       |       |       |       |       |       |       |       |       |       |   |   |   |   |   |   |   |   |   |   |   |   |   |   |   |   |   |   |   |   |   |   |   |   |   |   |   |   |   |   |   |   |   |   |   |   |   |   |   |   |   |   |   |   |   |   |   |   |   |   |   |   |   |   |       |    |   |   |   |   |   |   |   |   |   |   |   |   |   |
|------------------|----|-------|-------|-------|-------|-------|--------------|-------|------------------|-----------|-------|-------|-------|-------|-------|-------|-------|-------|-------|-------|-------|-------|-------|-------|-------|---|---|---|---|---|---|---|---|---|---|---|---|---|---|---|---|---|---|---|---|---|---|---|---|---|---|---|---|---|---|---|---|---|---|---|---|---|---|---|---|---|---|---|---|---|---|---|---|---|---|---|---|---|---|-------|----|---|---|---|---|---|---|---|---|---|---|---|---|---|
| PF3D7_1106800    | M  | ----- | ----- | ----- | ----- | ----- | GNTLDSNKPKNF | ----- | VTYADYKYIGKLNK   | -----     |       |       |       |       |       |       |       |       |       |       |       |       |       |       |       |   |   |   |   |   |   |   |   |   |   |   |   |   |   |   |   |   |   |   |   |   |   |   |   |   |   |   |   |   |   |   |   |   |   |   |   |   |   |   |   |   |   |   |   |   |   |   |   |   |   |   |   |   |   |       |    |   |   |   |   |   |   |   |   |   |   |   |   |   |
| PFIT_1107600     | M  | ----- | ----- | ----- | ----- | ----- | GNTLDSNKPKNF | ----- | VTYADYKYIGKLNK   | -----     |       |       |       |       |       |       |       |       |       |       |       |       |       |       |       |   |   |   |   |   |   |   |   |   |   |   |   |   |   |   |   |   |   |   |   |   |   |   |   |   |   |   |   |   |   |   |   |   |   |   |   |   |   |   |   |   |   |   |   |   |   |   |   |   |   |   |   |   |   |       |    |   |   |   |   |   |   |   |   |   |   |   |   |   |
| PPRFG01_1107500  | M  | ----- | ----- | ----- | ----- | ----- | GNTLDSNKPKNF | ----- | VTYADYKYIGKLNK   | -----     |       |       |       |       |       |       |       |       |       |       |       |       |       |       |       |   |   |   |   |   |   |   |   |   |   |   |   |   |   |   |   |   |   |   |   |   |   |   |   |   |   |   |   |   |   |   |   |   |   |   |   |   |   |   |   |   |   |   |   |   |   |   |   |   |   |   |   |   |   |       |    |   |   |   |   |   |   |   |   |   |   |   |   |   |
| PRCDC_1105300    | M  | ----- | ----- | ----- | ----- | ----- | GNTLDSNKPENF | ----- | VTYADYKYIGKLNK   | -----     |       |       |       |       |       |       |       |       |       |       |       |       |       |       |       |   |   |   |   |   |   |   |   |   |   |   |   |   |   |   |   |   |   |   |   |   |   |   |   |   |   |   |   |   |   |   |   |   |   |   |   |   |   |   |   |   |   |   |   |   |   |   |   |   |   |   |   |   |   |       |    |   |   |   |   |   |   |   |   |   |   |   |   |   |
| PRG01_1104000    | M  | ----- | ----- | ----- | ----- | ----- | GNTLDSNKPENF | ----- | VTYADYKYIGKLNK   | -----     |       |       |       |       |       |       |       |       |       |       |       |       |       |       |       |   |   |   |   |   |   |   |   |   |   |   |   |   |   |   |   |   |   |   |   |   |   |   |   |   |   |   |   |   |   |   |   |   |   |   |   |   |   |   |   |   |   |   |   |   |   |   |   |   |   |   |   |   |   |       |    |   |   |   |   |   |   |   |   |   |   |   |   |   |
| PBILCG01_1104000 | M  | ----- | ----- | ----- | ----- | ----- | GNTLDSNKPKNF | ----- | VTYADYNYIGKLNK   | -----     |       |       |       |       |       |       |       |       |       |       |       |       |       |       |       |   |   |   |   |   |   |   |   |   |   |   |   |   |   |   |   |   |   |   |   |   |   |   |   |   |   |   |   |   |   |   |   |   |   |   |   |   |   |   |   |   |   |   |   |   |   |   |   |   |   |   |   |   |   |       |    |   |   |   |   |   |   |   |   |   |   |   |   |   |
| PBLACG01_1104300 | M  | ----- | ----- | ----- | ----- | ----- | GNTLDSNKPKNS | ----- | VTYENYKYIGKLDNK  | -----     |       |       |       |       |       |       |       |       |       |       |       |       |       |       |       |   |   |   |   |   |   |   |   |   |   |   |   |   |   |   |   |   |   |   |   |   |   |   |   |   |   |   |   |   |   |   |   |   |   |   |   |   |   |   |   |   |   |   |   |   |   |   |   |   |   |   |   |   |   |       |    |   |   |   |   |   |   |   |   |   |   |   |   |   |
| PADL01_1105000   | M  | ----- | ----- | ----- | ----- | ----- | GNTLDSNKSKNL | ----- | FTYENYKYRGLNKN   | -----     |       |       |       |       |       |       |       |       |       |       |       |       |       |       |       |   |   |   |   |   |   |   |   |   |   |   |   |   |   |   |   |   |   |   |   |   |   |   |   |   |   |   |   |   |   |   |   |   |   |   |   |   |   |   |   |   |   |   |   |   |   |   |   |   |   |   |   |   |   |       |    |   |   |   |   |   |   |   |   |   |   |   |   |   |
| PGABG01_1103900  | M  | ----- | ----- | ----- | ----- | ----- | GNTLDSNKSKNL | ----- | FNENYKYRGLNKN    | -----     |       |       |       |       |       |       |       |       |       |       |       |       |       |       |       |   |   |   |   |   |   |   |   |   |   |   |   |   |   |   |   |   |   |   |   |   |   |   |   |   |   |   |   |   |   |   |   |   |   |   |   |   |   |   |   |   |   |   |   |   |   |   |   |   |   |   |   |   |   |       |    |   |   |   |   |   |   |   |   |   |   |   |   |   |
| PGSY75_1106800   | M  | ----- | ----- | ----- | ----- | ----- | GNTLDSNKSKNL | ----- | FNENYKYRGLNKN    | -----     |       |       |       |       |       |       |       |       |       |       |       |       |       |       |       |   |   |   |   |   |   |   |   |   |   |   |   |   |   |   |   |   |   |   |   |   |   |   |   |   |   |   |   |   |   |   |   |   |   |   |   |   |   |   |   |   |   |   |   |   |   |   |   |   |   |   |   |   |   |       |    |   |   |   |   |   |   |   |   |   |   |   |   |   |
| PGAL8A_00334100  | M  | ----- | ----- | ----- | ----- | ----- | GNNVSS-KLNNE | ----- | VEFENYKYIGELDKN  | -----     |       |       |       |       |       |       |       |       |       |       |       |       |       |       |       |   |   |   |   |   |   |   |   |   |   |   |   |   |   |   |   |   |   |   |   |   |   |   |   |   |   |   |   |   |   |   |   |   |   |   |   |   |   |   |   |   |   |   |   |   |   |   |   |   |   |   |   |   |   |       |    |   |   |   |   |   |   |   |   |   |   |   |   |   |
| PRELSG_0904000   | M  | ----- | ----- | ----- | ----- | ----- | GNDGS--KANNY | ----- | VEFDNYKYIGELNKN  | -----     |       |       |       |       |       |       |       |       |       |       |       |       |       |       |       |   |   |   |   |   |   |   |   |   |   |   |   |   |   |   |   |   |   |   |   |   |   |   |   |   |   |   |   |   |   |   |   |   |   |   |   |   |   |   |   |   |   |   |   |   |   |   |   |   |   |   |   |   |   |       |    |   |   |   |   |   |   |   |   |   |   |   |   |   |
| PocGH01_09013500 | M  | ----- | ----- | ----- | ----- | ----- | GNSVDS-KPGGS | ----- | VHFQKQYVGEELNNE  | -----     |       |       |       |       |       |       |       |       |       |       |       |       |       |       |       |   |   |   |   |   |   |   |   |   |   |   |   |   |   |   |   |   |   |   |   |   |   |   |   |   |   |   |   |   |   |   |   |   |   |   |   |   |   |   |   |   |   |   |   |   |   |   |   |   |   |   |   |   |   |       |    |   |   |   |   |   |   |   |   |   |   |   |   |   |
| PYYM_0941700     | M  | ----- | ----- | ----- | ----- | ----- | GNGNSV-QAKKY | ----- | IKFEKYYYYGDLNVD  | -----     |       |       |       |       |       |       |       |       |       |       |       |       |       |       |       |   |   |   |   |   |   |   |   |   |   |   |   |   |   |   |   |   |   |   |   |   |   |   |   |   |   |   |   |   |   |   |   |   |   |   |   |   |   |   |   |   |   |   |   |   |   |   |   |   |   |   |   |   |   |       |    |   |   |   |   |   |   |   |   |   |   |   |   |   |
| PY02790          | M  | ----- | ----- | ----- | ----- | ----- | GNGNSV-QAKKY | ----- | IKFEKYYYYGDLNVD  | -----     |       |       |       |       |       |       |       |       |       |       |       |       |       |       |       |   |   |   |   |   |   |   |   |   |   |   |   |   |   |   |   |   |   |   |   |   |   |   |   |   |   |   |   |   |   |   |   |   |   |   |   |   |   |   |   |   |   |   |   |   |   |   |   |   |   |   |   |   |   |       |    |   |   |   |   |   |   |   |   |   |   |   |   |   |
| PY02791          | M  | ----- | ----- | ----- | ----- | ----- | -----        | ----- | -----            | -----     |       |       |       |       |       |       |       |       |       |       |       |       |       |       |       |   |   |   |   |   |   |   |   |   |   |   |   |   |   |   |   |   |   |   |   |   |   |   |   |   |   |   |   |   |   |   |   |   |   |   |   |   |   |   |   |   |   |   |   |   |   |   |   |   |   |   |   |   |   |       |    |   |   |   |   |   |   |   |   |   |   |   |   |   |
| PBANKA_0940100   | M  | ----- | ----- | ----- | ----- | ----- | GNINSI-QTKNY | ----- | IKFEKYYYYAGDLNVD | -----     |       |       |       |       |       |       |       |       |       |       |       |       |       |       |       |   |   |   |   |   |   |   |   |   |   |   |   |   |   |   |   |   |   |   |   |   |   |   |   |   |   |   |   |   |   |   |   |   |   |   |   |   |   |   |   |   |   |   |   |   |   |   |   |   |   |   |   |   |   |       |    |   |   |   |   |   |   |   |   |   |   |   |   |   |
| PCHAS_0904200    | M  | ----- | ----- | ----- | ----- | ----- | GNTNST-ETNNY | ----- | IKFDKYYYYIGDLNVD | -----     |       |       |       |       |       |       |       |       |       |       |       |       |       |       |       |   |   |   |   |   |   |   |   |   |   |   |   |   |   |   |   |   |   |   |   |   |   |   |   |   |   |   |   |   |   |   |   |   |   |   |   |   |   |   |   |   |   |   |   |   |   |   |   |   |   |   |   |   |   |       |    |   |   |   |   |   |   |   |   |   |   |   |   |   |
| PCHAS_090420     | M  | ----- | ----- | ----- | ----- | ----- | GNTNST-ETNNY | ----- | IKFDKYYYYIGDLNVD | -----     |       |       |       |       |       |       |       |       |       |       |       |       |       |       |       |   |   |   |   |   |   |   |   |   |   |   |   |   |   |   |   |   |   |   |   |   |   |   |   |   |   |   |   |   |   |   |   |   |   |   |   |   |   |   |   |   |   |   |   |   |   |   |   |   |   |   |   |   |   |       |    |   |   |   |   |   |   |   |   |   |   |   |   |   |
| YYE_02751        | M  | ----- | ----- | ----- | ----- | ----- | GNTNSS-ETKNY | ----- | IKFDKYYYYIGDLNVD | -----     |       |       |       |       |       |       |       |       |       |       |       |       |       |       |       |   |   |   |   |   |   |   |   |   |   |   |   |   |   |   |   |   |   |   |   |   |   |   |   |   |   |   |   |   |   |   |   |   |   |   |   |   |   |   |   |   |   |   |   |   |   |   |   |   |   |   |   |   |   |       |    |   |   |   |   |   |   |   |   |   |   |   |   |   |
| YYG_01693        | M  | ----- | ----- | ----- | ----- | ----- | GNTNSS-ETKNY | ----- | IKFDKYYYYIGDLNVD | -----     |       |       |       |       |       |       |       |       |       |       |       |       |       |       |       |   |   |   |   |   |   |   |   |   |   |   |   |   |   |   |   |   |   |   |   |   |   |   |   |   |   |   |   |   |   |   |   |   |   |   |   |   |   |   |   |   |   |   |   |   |   |   |   |   |   |   |   |   |   |       |    |   |   |   |   |   |   |   |   |   |   |   |   |   |
| PmUG01_09016400  | M  | ----- | ----- | ----- | ----- | ----- | GNTTSS-KTSKY | ----- | VEFENYRYIGELNND  | -----     |       |       |       |       |       |       |       |       |       |       |       |       |       |       |       |   |   |   |   |   |   |   |   |   |   |   |   |   |   |   |   |   |   |   |   |   |   |   |   |   |   |   |   |   |   |   |   |   |   |   |   |   |   |   |   |   |   |   |   |   |   |   |   |   |   |   |   |   |   |       |    |   |   |   |   |   |   |   |   |   |   |   |   |   |
| C922_04039       | M  | ----- | ----- | ----- | ----- | ----- | GNSPDS-KPIKG | ----- | REFSTYRYIGELNSQ  | -----     |       |       |       |       |       |       |       |       |       |       |       |       |       |       |       |   |   |   |   |   |   |   |   |   |   |   |   |   |   |   |   |   |   |   |   |   |   |   |   |   |   |   |   |   |   |   |   |   |   |   |   |   |   |   |   |   |   |   |   |   |   |   |   |   |   |   |   |   |   |       |    |   |   |   |   |   |   |   |   |   |   |   |   |   |
| PcyM_0908600     | M  | ----- | ----- | ----- | ----- | ----- | GNSADS-KPIKG | ----- | REFSTYRYIGELNQ-  | -----     |       |       |       |       |       |       |       |       |       |       |       |       |       |       |       |   |   |   |   |   |   |   |   |   |   |   |   |   |   |   |   |   |   |   |   |   |   |   |   |   |   |   |   |   |   |   |   |   |   |   |   |   |   |   |   |   |   |   |   |   |   |   |   |   |   |   |   |   |   |       |    |   |   |   |   |   |   |   |   |   |   |   |   |   |
| PKNOH_s120122800 | M  | ----- | ----- | ----- | ----- | ----- | GNSSNS-KPIKG | ----- | RFSTYRYIGELNSE   | -----     |       |       |       |       |       |       |       |       |       |       |       |       |       |       |       |   |   |   |   |   |   |   |   |   |   |   |   |   |   |   |   |   |   |   |   |   |   |   |   |   |   |   |   |   |   |   |   |   |   |   |   |   |   |   |   |   |   |   |   |   |   |   |   |   |   |   |   |   |   |       |    |   |   |   |   |   |   |   |   |   |   |   |   |   |
| PKNH_0904400     | M  | ----- | ----- | ----- | ----- | ----- | GNSSNS-KPIKG | ----- | RFSTYRYIGELNSE   | -----     |       |       |       |       |       |       |       |       |       |       |       |       |       |       |       |   |   |   |   |   |   |   |   |   |   |   |   |   |   |   |   |   |   |   |   |   |   |   |   |   |   |   |   |   |   |   |   |   |   |   |   |   |   |   |   |   |   |   |   |   |   |   |   |   |   |   |   |   |   |       |    |   |   |   |   |   |   |   |   |   |   |   |   |   |
| PVP01_0907600    | M  | ----- | ----- | ----- | ----- | ----- | GNSPDS-KPIRG | ----- | RDFRGYRYIGELNDE  | -----     |       |       |       |       |       |       |       |       |       |       |       |       |       |       |       |   |   |   |   |   |   |   |   |   |   |   |   |   |   |   |   |   |   |   |   |   |   |   |   |   |   |   |   |   |   |   |   |   |   |   |   |   |   |   |   |   |   |   |   |   |   |   |   |   |   |   |   |   |   |       |    |   |   |   |   |   |   |   |   |   |   |   |   |   |
| PVK_091015       | M  | ----- | ----- | ----- | ----- | ----- | GNSPDS-KPIRG | ----- | RDFRGYRYIGELNDE  | -----     |       |       |       |       |       |       |       |       |       |       |       |       |       |       |       |   |   |   |   |   |   |   |   |   |   |   |   |   |   |   |   |   |   |   |   |   |   |   |   |   |   |   |   |   |   |   |   |   |   |   |   |   |   |   |   |   |   |   |   |   |   |   |   |   |   |   |   |   |   |       |    |   |   |   |   |   |   |   |   |   |   |   |   |   |
| THRCLA_22740     | M  | ----- | ----- | ----- | ----- | ----- | -----        | ----- | QLYRGYTKATI      | -----     |       |       |       |       |       |       |       |       |       |       |       |       |       |       |       |   |   |   |   |   |   |   |   |   |   |   |   |   |   |   |   |   |   |   |   |   |   |   |   |   |   |   |   |   |   |   |   |   |   |   |   |   |   |   |   |   |   |   |   |   |   |   |   |   |   |   |   |   |   |       |    |   |   |   |   |   |   |   |   |   |   |   |   |   |
| THRCLA_04632     | M  | ----- | ----- | ----- | ----- | ----- | -----        | ----- | -----            | -----     |       |       |       |       |       |       |       |       |       |       |       |       |       |       |       |   |   |   |   |   |   |   |   |   |   |   |   |   |   |   |   |   |   |   |   |   |   |   |   |   |   |   |   |   |   |   |   |   |   |   |   |   |   |   |   |   |   |   |   |   |   |   |   |   |   |   |   |   |   |       |    |   |   |   |   |   |   |   |   |   |   |   |   |   |
| BESB_019990      | M  | ----- | ----- | ----- | ----- | ----- | NYNKHS       | ----- | RYGLGCGNR        | -----     |       |       |       |       |       |       |       |       |       |       |       |       |       |       |       |   |   |   |   |   |   |   |   |   |   |   |   |   |   |   |   |   |   |   |   |   |   |   |   |   |   |   |   |   |   |   |   |   |   |   |   |   |   |   |   |   |   |   |   |   |   |   |   |   |   |   |   |   |   |       |    |   |   |   |   |   |   |   |   |   |   |   |   |   |
| BN1204_042460    | M  | ----- | ----- | ----- | ----- | ----- | GNRPLSPSPYD  | VDP   | PLGYTLLVSGD      | FYRGLSNDR |       |       |       |       |       |       |       |       |       |       |       |       |       |       |       |   |   |   |   |   |   |   |   |   |   |   |   |   |   |   |   |   |   |   |   |   |   |   |   |   |   |   |   |   |   |   |   |   |   |   |   |   |   |   |   |   |   |   |   |   |   |   |   |   |   |   |   |   |   |       |    |   |   |   |   |   |   |   |   |   |   |   |   |   |
| TGGT1_290225     | M  | ----- | ----- | ----- | ----- | ----- | GNRPLSPSPYD  | LDV   | PMGYTLLVSGD      | FYRGRDLDR |       |       |       |       |       |       |       |       |       |       |       |       |       |       |       |   |   |   |   |   |   |   |   |   |   |   |   |   |   |   |   |   |   |   |   |   |   |   |   |   |   |   |   |   |   |   |   |   |   |   |   |   |   |   |   |   |   |   |   |   |   |   |   |   |   |   |   |   |   |       |    |   |   |   |   |   |   |   |   |   |   |   |   |   |
| TGDOM2_290225    | M  | ----- | ----- | ----- | ----- | ----- | -----        | ----- | -----            | -----     |       |       |       |       |       |       |       |       |       |       |       |       |       |       |       |   |   |   |   |   |   |   |   |   |   |   |   |   |   |   |   |   |   |   |   |   |   |   |   |   |   |   |   |   |   |   |   |   |   |   |   |   |   |   |   |   |   |   |   |   |   |   |   |   |   |   |   |   |   |       |    |   |   |   |   |   |   |   |   |   |   |   |   |   |
| BN1205_083850    | M  | ----- | ----- | ----- | ----- | ----- | GNRPLSPSPYD  | LDV   | PMGYTLLVSGD      | FYRGRDLDR |       |       |       |       |       |       |       |       |       |       |       |       |       |       |       |   |   |   |   |   |   |   |   |   |   |   |   |   |   |   |   |   |   |   |   |   |   |   |   |   |   |   |   |   |   |   |   |   |   |   |   |   |   |   |   |   |   |   |   |   |   |   |   |   |   |   |   |   |   |       |    |   |   |   |   |   |   |   |   |   |   |   |   |   |
| HHA_290225       | M  | ----- | ----- | ----- | ----- | ----- | GNRPLSPSPYD  | LDV   | PLGYTLLVSGD      | FYRGRDLDR |       |       |       |       |       |       |       |       |       |       |       |       |       |       |       |   |   |   |   |   |   |   |   |   |   |   |   |   |   |   |   |   |   |   |   |   |   |   |   |   |   |   |   |   |   |   |   |   |   |   |   |   |   |   |   |   |   |   |   |   |   |   |   |   |   |   |   |   |   |       |    |   |   |   |   |   |   |   |   |   |   |   |   |   |
| ETH_00000110     | M  | ----- | ----- | ----- | ----- | ----- | GSSNVRPRVEA  | AFFP  | R                | G         | TLL   | L     | S     | T     | G     | R     | Y     | K     | G     | P     | T     | D     | P     |       |       |   |   |   |   |   |   |   |   |   |   |   |   |   |   |   |   |   |   |   |   |   |   |   |   |   |   |   |   |   |   |   |   |   |   |   |   |   |   |   |   |   |   |   |   |   |   |   |   |   |   |   |   |   |   |       |    |   |   |   |   |   |   |   |   |   |   |   |   |   |
| ENH_0020460      | M  | ----- | ----- | ----- | ----- | ----- | GSSNVRPRVEA  | AFFP  | R                | G         | TLL   | L     | S     | T     | G     | R     | Y     | K     | G     | P     | T     | D     | P     |       |       |   |   |   |   |   |   |   |   |   |   |   |   |   |   |   |   |   |   |   |   |   |   |   |   |   |   |   |   |   |   |   |   |   |   |   |   |   |   |   |   |   |   |   |   |   |   |   |   |   |   |   |   |   |   |       |    |   |   |   |   |   |   |   |   |   |   |   |   |   |
| EMWEY_00023200   | M  | ----- | ----- | ----- | ----- | ----- | DSSNVRAE     | VEGL  | -----            | -----     | ----- | ----- | ----- | ----- | ----- | ----- | ----- | ----- | ----- | ----- | ----- | ----- | ----- | ----- | ----- |   |   |   |   |   |   |   |   |   |   |   |   |   |   |   |   |   |   |   |   |   |   |   |   |   |   |   |   |   |   |   |   |   |   |   |   |   |   |   |   |   |   |   |   |   |   |   |   |   |   |   |   |   |   |       |    |   |   |   |   |   |   |   |   |   |   |   |   |   |
| Hs_RAF1          | M  | ----- | ----- | ----- | ----- | ----- | EHIQGA       | W     | K                | T         | I     | S     | N     | G     | F     | ----- | ----- | ----- | ----- | ----- | ----- | ----- | ----- | ----- | ----- |   |   |   |   |   |   |   |   |   |   |   |   |   |   |   |   |   |   |   |   |   |   |   |   |   |   |   |   |   |   |   |   |   |   |   |   |   |   |   |   |   |   |   |   |   |   |   |   |   |   |   |   |   |   |       |    |   |   |   |   |   |   |   |   |   |   |   |   |   |
| Pa_RAF1          | M  | ----- | ----- | ----- | ----- | ----- | EHIQGA       | W     | K                | T         | I     | S     | N     | G     | F     | ----- | ----- | ----- | ----- | ----- | ----- | ----- | ----- | ----- | ----- |   |   |   |   |   |   |   |   |   |   |   |   |   |   |   |   |   |   |   |   |   |   |   |   |   |   |   |   |   |   |   |   |   |   |   |   |   |   |   |   |   |   |   |   |   |   |   |   |   |   |   |   |   |   |       |    |   |   |   |   |   |   |   |   |   |   |   |   |   |
| Mm_RAF1          | M  | ----- | ----- | ----- | ----- | ----- | EHIQGA       | W     | K                | T         | I     | S     | N     | G     | F     | ----- | ----- | ----- | ----- | ----- | ----- | ----- | ----- | ----- | ----- |   |   |   |   |   |   |   |   |   |   |   |   |   |   |   |   |   |   |   |   |   |   |   |   |   |   |   |   |   |   |   |   |   |   |   |   |   |   |   |   |   |   |   |   |   |   |   |   |   |   |   |   |   |   |       |    |   |   |   |   |   |   |   |   |   |   |   |   |   |
| Rn_RAF1          | M  | ----- | ----- | ----- | ----- | ----- | EHIQGA       | W     | K                | T         | I     | S     | N     | G     | F     | ----- | ----- | ----- | ----- | ----- | ----- | ----- | ----- | ----- | ----- |   |   |   |   |   |   |   |   |   |   |   |   |   |   |   |   |   |   |   |   |   |   |   |   |   |   |   |   |   |   |   |   |   |   |   |   |   |   |   |   |   |   |   |   |   |   |   |   |   |   |   |   |   |   |       |    |   |   |   |   |   |   |   |   |   |   |   |   |   |
| Bt_RAF1          | M  | ----- | ----- | ----- | ----- | ----- | EHIQGA       | W     | K                | T         | I     | S     | N     | G     | F     | ----- | ----- | ----- | ----- | ----- | ----- | ----- | ----- | ----- | ----- |   |   |   |   |   |   |   |   |   |   |   |   |   |   |   |   |   |   |   |   |   |   |   |   |   |   |   |   |   |   |   |   |   |   |   |   |   |   |   |   |   |   |   |   |   |   |   |   |   |   |   |   |   |   |       |    |   |   |   |   |   |   |   |   |   |   |   |   |   |
| Gg_RAF1          | M  | ----- | ----- | ----- | ----- | ----- | EHIQGA       | W     | K                | T         | I     | S     | N     | G     | F     | ----- | ----- | ----- | ----- | ----- | ----- | ----- | ----- | ----- | ----- |   |   |   |   |   |   |   |   |   |   |   |   |   |   |   |   |   |   |   |   |   |   |   |   |   |   |   |   |   |   |   |   |   |   |   |   |   |   |   |   |   |   |   |   |   |   |   |   |   |   |   |   |   |   |       |    |   |   |   |   |   |   |   |   |   |   |   |   |   |
| Xl_RAF1          | M  | ----- | ----- | ----- | ----- | ----- | EHIQGA       | W     | K                | T         | I     | S     | N     | G     | F     | ----- | ----- | ----- | ----- | ----- | ----- | ----- | ----- | ----- | ----- |   |   |   |   |   |   |   |   |   |   |   |   |   |   |   |   |   |   |   |   |   |   |   |   |   |   |   |   |   |   |   |   |   |   |   |   |   |   |   |   |   |   |   |   |   |   |   |   |   |   |   |   |   |   |       |    |   |   |   |   |   |   |   |   |   |   |   |   |   |
| Ce_RAF1          | M  | ----- | ----- | ----- | ----- | ----- | SRIN         | F     | K                | K         | S     | S     | A     | S     | T     | T     | P     | ----- | ----- | ----- | ----- | ----- | ----- | ----- | ----- |   |   |   |   |   |   |   |   |   |   |   |   |   |   |   |   |   |   |   |   |   |   |   |   |   |   |   |   |   |   |   |   |   |   |   |   |   |   |   |   |   |   |   |   |   |   |   |   |   |   |   |   |   |   |       |    |   |   |   |   |   |   |   |   |   |   |   |   |   |
| GNI_162980       | M  | MV    | E     | L     | Q     | S     | P            | H     | L                | H         | P     | S     | P     | L     | L     | P     | P     | Q     | V     | P     | R     | L     | T     | T     | A     | P | G | C | L | Q | N | V | R | P | P | E | A | H | G | D | G | T | P | D | L | N | G | R | N | R | V | R | Q | V | S | T | R | H | L | T | Q | H | L | A | E | E | Q | E | S | P | T | A | R | S | G | Q | S | G | G | ----- | LE | A | S | G | L | R | F | R | G | S | N | T | A | V |

  

|                  | 110   | 120  | 130   | 140              | 150             | 160      | 170   | 180   | 190   | 200  |       |       |    |
|------------------|-------|------|-------|------------------|-----------------|----------|-------|-------|-------|------|-------|-------|----|
| PF3D7_1106800    | ----- | NEHH | ----- | GIGIILYNSGESFYGS | FINGKKEGKGIYID  | KNLTRYIN | ----- | ----- | TWVDN | NKVF | GKVK  | ----- | VV |
| PFIT_1107600     | ----- | NEHH | ----- | GIGIILYNSGESFYGS | FINGKKEGKGIYID  | KNLTRYIN | ----- | ----- | TWVDN | NKVF | GKVK  | ----- | VV |
| PPRFG01_1107500  | ----- | NEHH | ----- | GIGIILYNSGESFYGS | FINGKKEGKGIYID  | KNLTRYIN | ----- | ----- | TWVDN | NKVF | GKVK  | ----- | VV |
| PRCDC_1105300    | ----- | NQHH | ----- | GIGIILYNSGESFYGS | FINGKKEGKGIYID  | KNLTRYIN | ----- | ----- | TWVDN | NNVF | GKVK  | ----- | VV |
| PRG01_1104000    | ----- | NQHH | ----- | GIGIILYNSGESFYGS | FINGKKEGKGIYID  | KNLTRYIN | ----- | ----- | TWVDN | NNVF | GKVK  | ----- | VV |
| PBILCG01_1104000 | ----- | NEPH | ----- | GIGIILYNSGESFYGS | FINGKKEGKGIYID  | KNLTRYIN | ----- | ----- | TWVDD | KVLG | GKVK  | ----- | VV |
| PBLACG01_1104300 | ----- | NEPH | ----- | GIGIILYNSGESFYGS | FINGKKEGKGIYID  | KNLTRYIN | ----- | ----- | TWVDD | KVLG | GKVK  | ----- | VV |
| PADL01_1105000   | ----- | NQPH | ----- | GIGIILYNSGESFYGS | FINGKKEGKGIYID  | KNLTRYIN | ----- | ----- | IWKDD | KVIG | GKVK  | ----- | VL |
| PGABG01_1103900  | ----- | NQPH | ----- | GIGIILYNSGESFYGS | FINGKKEGKGIYID  | KNLTRYIN | ----- | ----- | IWKDD | KVIG | GKVK  | ----- | VL |
| PGSY75_1106800   | ----- | NQPH | ----- | GIGIILYNSGESFYGS | FINGKKEGKGIYID  | KNLTRYIN | ----- | ----- | IWKDD | KVIG | GKVK  | ----- | VL |
| PGAL8A_00334100  | ----- | NLPH | ----- | GKGLILYNSGESFYGS | FYFNGKRRNGKIYID | KKLT     | KYKC  | ----- | NWKDD | KVFK | KLK   | ----- | IN |
| PRELSG_0904000   | ----- | NLPH | ----- | GKGLILYNSGESFYGS | FYFNGKRRNGKIYID | KKLT     | KYKC  | ----- | NWKDD | KVFK | KLK   | ----- | IN |
| PocGH01_09013500 | ----- | NLPH | ----- | GKGLILYNSGESFYGS | FYFNGKRRNGKIYID | KKLT     | KYKC  | ----- | NWKDD | KVFK | KLK   | ----- | IN |
| PYYM_0941700     | ----- | NLPH | ----- | GRGLILYNSGESFYGS | FYFNGKRRNGKIYID | KKLT     | KYKC  | ----- | NWKDD | KVFK | KLK   | ----- | IN |
| PY02790          | ----- | NLPH | ----- | GRGLILYNSGESFYGS | FYFNGKRRNGKIYID | KKLT     | KYKC  | ----- | NWKDD | KVFK | KLK   | ----- | IN |
| PY02791          | ----- | NLPH | ----- | GRGLILYNSGESFYGS | FYFNGKRRNGKIYID | KKLT     | KYKC  | ----- | NWKDD | KVFK | KLK   | ----- | IN |
| PBANKA_0940100   | ----- | NLPH | ----- | GRGLMLYENGSFFG   | HFGKKGKGIYID    | KNLTKYIS | ----- | ----- | KWKYD | HIS  | NKVK  | ----- | VK |
| PCHAS_0904200    | ----- | NLPH | ----- | GRGLILYENGSFFG   | HFGKKGKGIYID    | KNLTKYIS | ----- | ----- | NWAYG | NI   | LNKVK | ----- | VK |
| PCHAS_090420     | ----- | NLPH | ----- | GRGLILYENGSFFG   | HFGKKGKGIYID    | KNLTKYIS | ----- | ----- | NWAYG | NI   | LNKVK | ----- | VK |
| YYE_02751        | ----- | NLPH | ----- | GRGLILYENGSFFG   | HFGKKGKGIYID    | KNLTKYIS | ----- | ----- | YWAYG | NI   | LNKVK | ----- | VK |
| YYG_01693        | ----- | NLPH | ----- | GRGLILYENGSFFG   | HFGKKGKGIYID    | KNLTKYIS | ----- | ----- | NWAYG | NI   | LNKVK | ----- | VK |
| PmUG01_09016400  | ----- | RMPN | ----- | GKGVVLYNSGESFYGS | FYFNGKRRNGKIYID | KKLT     | KYIC  | ----- | NWKDD | KV   | RGVH  | ----- | II |
| C922_04039       | ----- | GVPN | ----- | GKGLILHNSGEAFYGS | FYFNGKRRNGKIYID | KKLT     | KYIC  | ----- | NWVND | KV   | DELK  | ----- | VK |
| PcyM_0908600     | ----- | REPN | ----- | GKGLILHNSGEAFYGS | FYFNGKRRNGKIYID | KKLT     | KYIC  | ----- | KWVND | KA   | HRELK | ----- | VK |
| PKNOH_s120122800 | ----- | SVPD | ----- | GKGLILHNSGEAFYGS | FYFNGKRRNGKIYID | KKLT     | KYIS  | ----- | NWVND | KV   | DGELK | ----- | VK |
| PKNH_0904400     | ----- | SVPD | ----- | GKGLILHNSGEAFYGS | FYFNGKRRNGKIYID | KKLT     | KYIS  | ----- | NWVND | KV   | DGELK | ----- | VK |
| PVP01_0907600    | ----- | REPN | ----- | GKGLILHNSGEAFYGS | FYFNGKRRNGKIYID | KKLT     | KYIC  | ----- | NWVND | TV   | DGELK | ----- | VK |



PADL01\_110500 -----I--NNKESY-HKHNN-----YNDLHNNSHNHSYS D  
PGAB01\_1103900 -----I--NNKEYY-HKHNT-----YTNYLHNNSHNHSYS D  
PGSY75\_1106800 -----I--NNKEYY-HKHNT-----YTNYLHNNSHNHSYS D  
PGAL8A\_00334100 -----KEKKNK-NKNKILYKGNNYELRNEKINR---YDNNKINNNNNQ  
PRELSG\_0904000 -----NKK-KKKKILHKRNSQEMKGTQINKNNNEIIVNNEEKKNNNNNE  
PocGH01\_09013500 -----TKEGRK-SSNQSIPICSH-----TNACVHGKKGYEAGYEGMREGKQK  
PY02790 -----KXKKKKKK-KKNDXILEDTK-----IQNCKEKSFVNKK  
PY02791 -----KXKKKKKK-KKNDXILEDTK-----IQNCKEKSFVNKK  
PBANKA\_0940100 -----KXKKKK-KKNDGILEDESEIQ-NRSINFEKDNIMIIONCQEKSIVNKK  
PCHAS\_0904200 -----SHKKKT-IKHEQVLVDSE-----IQNCKEKSVDNQK  
PCHAS\_090420 -----SHKKKT-IKHEQVLVDSE-----IQNCKEKSVDNQK  
YYE\_02751 -----QKKKK-KKNNVLLVDSE-----IQNWEEKNVDNQK  
YYG\_01693 -----SKKKKK-KKNDLLLVDSE-----IQNCKEKNIDNQK  
PmUG01\_09016400 -----N-SGRNSGRS-SGRNSGRSSGHSSGRSSGNLMSDLNPLRSGVTVSASA  
C922\_04039 -----LGRSLDAE-PKGGTPR-WGE-----LHSPDI--DNEPDRADVVTIEBGA  
PcyM\_0908600 -----PEHSLDAQ-PKRRTPK-GGE-----THSAEI--KNGLDRAHVSTVEGD  
PKNOH\_s120122800 -----PERSLHAK-WK-RTPK-GGE-----THSVYI--NDELAMADACTVEDAN  
PKNH\_0904400 -----PERSLHAK-WK-RTPK-GGE-----THSVYI--NDELAMADACTVEDAN  
PVP01\_0907600 -----SERGLDEE-QSRGTPKGGGE-----PQSVNI--RNKL--D  
PVX\_091015 -----SERGLDEE-QSRGTPKGGGE-----PQSVNI--RNKL--D  
THRCLA\_22740 -----SERGLDEE-QSRGTPKGGGE-----PQSVNI--RNKL--D  
THRCLA\_04632 -----  
BESB\_019990 -----  
BN1204\_042460 -----LDIRNTSSVPLKDDALGQLAE-----  
TGGT1\_290225 -----LPMHGPSSL-LKDATLSQAGR-----  
TGD0M2\_290225 -----LPMHGPSSL-LKDATLSQAGR-----  
BN1205\_083850 -----LPMHGPSSL-LKDATLSQAGR-----  
HHA\_290225 -----LRMHGPSSL-LSEPTLSHAGR-----  
ETH\_00000110 -----VLVRGPGVL-SEARSPVAA-----  
ENH\_0020460 -----VLVRGPGVL-SEARSPVAA-----  
EMWEY\_00023200 -----VQLRGPAPL-YEGPPP-----  
Hs\_RAF1 -----HDCL-MK-----  
Pa\_RAF1 -----HDCL-MK-----  
Mm\_RAF1 -----HDCL-MK-----  
Rn\_RAF1 -----HDCL-MK-----  
Bt\_RAF1 -----HDCL-MK-----  
Gg\_RAF1 -----HDCL-MK-----  
Xl\_RAF1 -----HDCL-MK-----  
Ce\_RAF1 -----RDAI-SK-----  
GNI\_162980 -----WAEEYCRGVL-VNHALVAVQGE-----

410 420 430 440 450 460 470 480 490 500

PF3D7\_1106800 DEE-----KRKY--PIGVTKFKEDLSN-----YIHSTHI-MKKN-----NKLFNKN--D-----KEY  
PFIT\_1107600 DEE-----KRKY--PIGVTKFKEDLSN-----YIHSTHI-MKKN-----NKLFNKN--D-----NEY  
PPRF01\_1107500 DEE-----KRKY--PIGVTKFKEDLSN-----YIHSTHI-MKKN-----NKLFNKN--D-----NEY  
PRCDC\_1105300 DEE-----KRKY--PIGDIKFKEDLSN-----YIHSTHI-KKKN-----NKLFNKN--D-----KEY  
PRG01\_1104000 DEE-----KRKY--PIGDIKFKEDLSN-----YIHSTHI-KKKN-----NKLFNKN--D-----KEY  
PBILCG01\_1104000 DEE-----KRKR--SFGDTKFKEDLSN-----YIHTSHI-KKKN-----NKIFNKN--D-----KEY  
PBLACG01\_1104300 DEE-----KRKY--SHGDTNFKEQLSN-----YIHTTHL-DKKN-----NKLFNKN--D-----KEY  
PADL01\_1105000 KEE-----KKNY--SIEHTNYKEEQLYN-----YIDTTHM-KKKNNNNNNNNNK---IFNNNNIF--NKIFNKN--H-----SEY  
PGAB01\_1103900 KEE-----KKNY--SIEHTNYKEEQLYN-----YIDTTHI-KKKNNNNNNNNNN---NNNNNNNF--SNDIFNKN--H-----DEY  
PGSY75\_1106800 KEE-----KKNY--SIEHTNYKEEQLYN-----YIDTTHI-KKKNNNNNNNNNN---NNNNNNNF--SNDIFNKN--H-----NEY  
PGAL8A\_00334100 NNDVHITSV--KNKY--PNRENFINKC-N-----I-----LESGNNTYINDNENNFN--NESKDNL--SDNKEKSIK-KE-----EIE  
PRELSG\_0904000 NEDINIKSV--KKNF--IKRESFDINGNLN-----ENRQTENGNNAYINNGENNYND--DKSNKIDI--YNNKKNRIK-KK-----EIK  
PocGH01\_09013500 DTHIDGDP--KELYKGGNLPKSPPFEEKGS-----GSENGNANNKSNNGINNYSSSS--DEDLQNDLITGSDKIKNKK--GD-----NLD  
PY02790 DEIID-----KDFE-----KDDSDKVDN-----FSKNINLEQSQNNMLKYKKKKKF--DKMNYLN-----D  
PY02791 DEIID-----KDFE-----KDDSDKVDN-----FSKNINLEQSQNNMLKYKKKKKF--DKMNYLN-----D  
PBANKA\_0940100 EEIIDI PNN-----KYNE-----NDDTDKVDN-----FSKNINLEQSQNNMLKYKKKKTF--DEMNSLN-----D  
PCHAS\_0904200 DETIDI PND-----KHKV-----KNDILKYKKTCKTS--DKINPLN-----D  
PCHAS\_090420 DETIDI PND-----KHKV-----KNDILKYKKTCKTS--DKINPLN-----D  
YYE\_02751 DETIDI PND-----KHKV-----KNDILKYKKNIS--DDINSLN-----N  
YYG\_01693 DETIDI PND-----KHKV-----KNDILKYKKNIS--DEMNSLN-----D  
PmUG01\_09016400 QEEINRSEEEGPNKGVTDNCIKRENLMQDP SH-----LNEKINVEEKQTCIYNSQHYGAS--KREBENNLYKNSNK--KEVK-ID-----SLT  
C922\_04039 KGCASILPVS---KPSYV--LPFGRIQQGTAASR-----QSGHREDAIESSRMGQLQISME--DSHDEANI--PVNELTKKR--SDKQLKEGGTWK  
PcyM\_0908600 KGCVSILPVS---KPGSVCFLPRGRVQQRTASREGGHGSGRLQSGHREDAIESSRVQDLQVAMEKESHDEANI--PVNERPKKI--IDEELKKNGTWE  
PKNOH\_s120122800 KGWVSTLPVR---KPGYV--LPIGRIQGRTVSR-----EIGYHEDVIEICPMDQRQVSM--NPHDEANI--QMNELTKKK--IDEQLKKE--ILE  
PKNH\_0904400 KGWVSTLPVR---KPGYV--LPIGRIQGRTVSR-----EIGYHEDVIEICPMDQRQVSM--NPHDEANI--QMNELTKKK--IDEQLKKE--ILE  
PVP01\_0907600 GEGVSFIPVS---QPGYF--FPAGRTHHGRTAGP-----GSDHREDAIE-----SSHDEANI--PADELNKKR--IDEPLKDDTWK  
PVX\_091015 GEGVSFIPVS---QPGYF--FPAGRTHHGRTAGP-----GSDHREDAIE-----SSHDEANI--PADELNKKR--IDEPLKDDTWK  
THRCLA\_22740 -----  
THRCLA\_04632 -----  
BESB\_019990 -----PFSSPSRR--TD-----  
BN1204\_042460 -----RKREAVSR-----PLSCAHATR--TD-----TEK  
TGGT1\_290225 -----RREEAGTR-----AGSRAFGVSTCTD-----AIT  
TGD0M2\_290225 -----  
BN1205\_083850 -----RREE-----D-----AIT  
HHA\_290225 -----TREEASSG-----PGSRAFGTCTD-----ASK  
ETH\_00000110 -----PGPTACSAH--D-----AVG  
ENH\_0020460 -----PGPTACSAH--D-----AVG



PCHAS\_090420 R---M-DHIEGSKPSTIFENDNIMDNKKV---RTDMSEEMIMLRKLDIINNNTDLKIEYELWNKEQVAHWLSL-  
 YYE\_02751 ---KSSSTNFENDNIMDNKKV---GEMSEENIMLRKLDIINNNTDLKIEYELWNKEQVAHWLSL-  
 YYG\_01693 C---M-GHSECSKSSSTNFENDNIMDNKKV---RTDMSEENIMLRKLDIINNNTDLKIEYELWNKEQVAHWLSL-  
 PmUG01\_09016400 KERDGN-INKQIKQQLKENEMSNHIDDLRVYGVKVSAA---NRRYKNKYMLHNIIGN--PNKGNINIEYEMWSRKEIAQWLT-  
 C922\_04039 LTI--I-THTSTKKD---ERKTKHMIKRLSK--ENSSSLKIDQYESWSRKEVAQWLSL-  
 PcyM\_0908600 LTI--I-THTSTKKE---QRKTKHMIKRLTK--QNSSSLKIDQYESWSRKEVAQWLSL-  
 PKNOH\_S120122800 ITI--M-THTSTKKE---EKKTKHIIKRLTK--QNSNSLKIEKYEAWSRKEVAHWLSL-  
 PKNH\_0904400 ITI--M-THTSTKKE---EKKTKHIIKRLTK--QNSNSLKIEKYEAWSRKEVAHWLSL-  
 PVP01\_0907600 LSI--V-THTLAKKE---ERKTKHMIKRLTK--QNSNSLRIDKYESWSRREVAQWLSL-  
 PVX\_091015 LSI--V-THTLAKKE---ERKTKHMIKRLTK--QNSNSLRIDKYESWSRREVAQWLSL-  
 THRCLA\_22740 -----  
 THRCLA\_04632 -----  
 BESB\_019990 -----  
 BN1204\_042460 A---H-ARREPGAHAL---TLPASPWHLDLAASQNGPSPRAEAFVDPYAWSPEELCARLSSF  
 TGGT1\_290225 R---LRERRLRERDLL---TLPANAWHLNLAASPSGRTPTLEAFVDPYAWSPEELCSRSTF  
 TGD0M2\_290225 -----  
 BN1205\_083850 ---ERRLRERDLL---TLPANAWHLNLAASPSGRTPTLEAFVDPYAWSPEELCSRSTF  
 HHA\_290225 ---ERWLRERDVL---TLPANAWHVDLAASPSGRTPTLEAFVDPYAWSPEELCSRSTF  
 ETH\_00000110 -----  
 ENH\_0020460 ---NGAARHSRSAAVAAAAAASGRSCLEPVHWTPEELARWLRLA  
 EMWEY\_00023200 ---NGTARHSRSAA-AAAAAASDRSCLEPVHWTPEELARWLRLA  
 Hs\_RAF1 ---GSGYGHSAAVSAAAAAASPVSVEDSENAEHSW---  
 Pa\_RAF1 ---LHEHKGKKARL---DWNTDAA---SLI  
 Mm\_RAF1 ---LHEHKGKKARL---DWNTDAA---SLI  
 Rn\_RAF1 ---LQEHKGKKARL---DWNTDAA---SLI  
 Bt\_RAF1 ---LQEHKGKKARL---DWNTDAA---SLI  
 Gg\_RAF1 ---LHEHKGKKARL---DWNTDAA---SLI  
 X1\_RAF1 ---VTEPKGKKVRL---DWNTDAA---SLI  
 Ce\_RAF1 ---IQDPKG-KLRL---DWNTDAM---SLV  
 GNI\_162980 ---SSDPKQESTIEL---SLTMEIAS---RLP  
 R-----LGGSPGSGCCQHGV---VSPNPGSVLHPAALPKHGSQAQYLSSG

710 720 730 740 750 760 770 780 790 800  
 PF3D7\_1106800 .....|.....|.....|.....|.....|.....|.....|.....|.....|.....|  
 PFIT\_1107600 ---CNVPEKWLISFYKNNITGDKLKYININTIRNELGI---IAYGHAIKILQLIKNLQVMAYNKKF  
 PPRFG01\_1107500 ---CNVPEKWLISFYKNNITGDKLKYININTIRNELGI---IAYGHAIKILQLIKNLQVMAYNKKF  
 PRCDC\_1105300 ---CNVPEKWLISFYKNNITGDKLKYININTIRNELGI---IAYGHAIKILQLIKNLQVMAYNKKF  
 PRG01\_1104000 ---CNVPEKWLISFYKNNITGDKLKYININTIRNELGI---IAYGHAIKILQLIKNLQVMAYNKKF  
 PBILCG01\_1104000 ---CNVPEKWLISFYKNNITGDKLKYININTIRNELGI---IAYGHAIKILQLIKNLQVMAYNKKF  
 PBLACG01\_1104300 ---CNVPEKWLISFYKNNITGDKLKYININTIRNELGI---IAYGHAIKILQLIKNLQVMAYNKKF  
 PADL01\_1105000 ---CNVPEKWLISFYKNNITGDKLKYININTIRNELGI---IAYGHAIKILQLIKNLQVMAYNKKF  
 PGABG01\_1103900 ---CYVPIKWIISFYKNNITGDKLKYININTIRNELGI---IAYGHAIKILQLIKNLQVMAYNKKF  
 PGSY75\_1106800 ---CYVPIKWIISFYKNNITGDKLKYININTIRNELGI---IAYGHAIKILQLIKNLQVMAYNKKF  
 PGAL8A\_00334100 ---CNVPIKWIIMAIYKNNITGFKLNNLNLNTIRNQLGI---FSYGHAIKLLQLIKNLRIMAYNKKF  
 PRELSG\_0904000 ---CNVPIKWIIMAIYKNNITGFKLNNLNLNTIRNQLGI---FSYGHAIKLLQLIKNLRIMAYNKKF  
 PocGH01\_09013500 ---CNVPIKWLIGAYKNNITGDKLNSLNDLDIRNELGI---LPYGHAIKMLQLIKNLRVIMAYNKKF  
 PYYM\_0941700 ---CKVPMKWALIVYKNNINGQKLNLLNLYFIRNKLGI---LSYGQSIKFLQLIKNLRVITAYNTRL  
 PY02790 ---CKVPMKWALIVYKNNINGQKLNLLNLYFIRNKLGI---LSYGQSIKFLQLIKNLRVITAYNTRL  
 PY02791 -----  
 PBANKA\_0940100 ---CNVPEKWLISFYKNNITGDKLKYININTIRNELGI---IAYGHAIKILQLIKNLQVMAYNKKF  
 PCHAS\_0904200 ---CSVPEKVVSVYKNNITGHLKLNINLHYIRNKLGI---LPYGQAIKLLQLIKNLRVITAYNTRL  
 PCHAS\_0904200 ---CSVPEKVVSVYKNNITGHLKLNINLHYIRNKLGI---LPYGQAIKLLQLIKNLRVITAYNTRL  
 YYE\_02751 ---CSVPEKVVSVYKNNITGQKLNINLHYIRNKLGI---LPYGQAIKLLQLIKNLRVITAYNTRL  
 YYG\_01693 ---CSVPEKVVSVYKNNITGPKLNINLHYIRNKLGI---LPYGQAIKLLQLIKNLRVITAYNTRL  
 PmUG01\_09016400 ---CNVPEKWLISFYKNNITGKLNLDLNDLDIRNELGI---LPYGHAIKMLQLIKNLRVIMAYNKKF  
 C922\_04039 ---CNAPIKWITAFYRNNVTGDRLDRLNIEIIRNQLGI---LPYGHAIKLLQLIKNLRVITAYNTRL  
 PcyM\_0908600 ---CNAPIKWITAFYRNNVTGSMLEDMNIEIVRNQLGI---LPYGHAIKLLQLIKNLRVIMAYNKKF  
 PKNOH\_S120122800 ---CNVPEKWLISFYKNNITGKLNLDLNDLDIRNELGI---LPYGHAIKMLQLIKNLRVIMAYNKKF  
 PKNH\_0904400 ---CNVPEKWLISFYKNNITGKLNLDLNDLDIRNELGI---LPYGHAIKMLQLIKNLRVIMAYNKKF  
 PVP01\_0907600 ---CNTPIKWITAFYRNNITGDMLEDMNIEIVRNQLGI---LPYGHAIKLLQLIKNLRVIMAYNKKF  
 PVX\_091015 ---CNTPIKWITAFYRNNITGDMLEDMNIEIVRNQLGI---LPYGHAIKLLQLIKNLRVIMAYNKKF  
 THRCLA\_22740 -----  
 THRCLA\_04632 -----  
 BESB\_019990 ---GARPPSPFPPSLAPQAGGG---LEALRALA---  
 BN1204\_042460 ATDG---GKLPAEFIDRCRAKALTGAREFMNLTQDILRRDLGL---STFGQSRVQLVKSALKAEYTKHSRY-SSAFSPSP-SYSSPFPAPSLSS  
 TGGT1\_290225 VMEG---GKLPDFIERCRKALTGAEFMSLTHTLRRDLEL---STFGQSRVQLVKSALKAEYTKHSRY-SSAFSPSP-SYSSPFPAPSLSS  
 TGD0M2\_290225 ---MSLTHTLRRDLEL---STFGQSRVQLVKSALKAEYTKHSRY-SSAFSPSP-SYSSPFPAPSLSS  
 BN1205\_083850 VMEG---GKLPDFIERCRKALTGAEFMSLTHTLRRDLEL---STFGQSRVQLVKSALKAEYTKHSRY-SSAFSPSP-SYSSPFPAPSLSS  
 HHA\_290225 AMEG---GRLPPDFIERCRKALTGAEFMSLTHTLRRDLEL---STFGQSRVQLVKSALKAEYTKHSRY-SSGSSRLPSSSSSFPFPAPSLSS  
 ETH\_00000110 SSEL---RSQKLEPFIEALLERRVGGENFLSLNARLKRFGM---ATFGGRNRVLMFVKLLRLQASRRRR  
 ENH\_0020460 SSEL---RSQKLEPFIEALLARRVGGESFLSLNARLKRFGM---ATFGGRNRVLMFVKLLRLQASRRRR  
 EMWEY\_00023200 ---PEAEGEGEFCLCTAAQLKRDQFGL---ITFGGRNRVLMFVKLLRLQASRRRR  
 Hs\_RAF1 G---EELQVDFLDHV---PLTTHNFARKTFLK---LAFCDICQKF-LLNGFRCQTCGYKF  
 Pa\_RAF1 G---EELQVDFLDHV---PLTTHNFARKTFLK---LAFCDICQKF-LLNGFRCQTCGYKF  
 Mm\_RAF1 G---EELQVDFLDHV---PLTTHNFARKTFLK---LAFCDICQKF-LLNGFRCQTCGYKF  
 Rn\_RAF1 G---EELQVDFLDHV---PLTTHNFARKTFLK---LAFCDICQKF-LLNGFRCQTCGYKF  
 Bt\_RAF1 G---EELQVDFLDHV---PLTTHNFARKTFLK---LAFCDICQKF-LLNGFRCQTCGYKF  
 Gg\_RAF1 G---EELQVDFLDHV---PLTTHNFARKTFLK---LAFCDICQKF-LLNGFRCQTCGYKF  
 X1\_RAF1 G---EELQVDFLDHV---PLTTHNFARKTFLK---LAFCDICQKF-LLNGFRCQTCGYKF  
 Ce\_RAF1 G---EELQVDFLDHV---PLTTHNFARKTFLK---LAFCDICQKF-LLNGFRCQTCGYKF  
 GNI\_162980 GNE---LWVHSEYLVNTV---SSIKHAIVRRTFIP---PKSCDVNNPIWMMGFRCFCQPKF  
 DPNFNTYPGSGSSAAKFSVSTVEGTAAPTNGYGPFIANLDCKGGGISRLFPSSRYSDTQDSGSQARSGQARSGQDRSS



THRCLA\_04632 -----AARRSLSSSPSRGTTSSSEYEGTAPNRDPALGDAC-----AGNDRRGSQD-----  
 BESB\_019990 -----AARRSLSSSPSRGTTSSSEYEGTAPNRDPALGDAC-----AGNDRRGSQD-----  
 BN1204\_042460 PF-PLFLANLAPHQGGGALRALAARRSVSSSPSGGTTSSGEDEIA--REPETEG-----ARAAARRCVAASIFGPETQAWAPARREEEG-----  
 TGGT1\_290225 PSGQVALERLALDQGGGALRALAARRSFSSSLSGGTTSSNEEETGK--ETGDAAGREAGNEERGERANSRRALLGRDA--DSRLFLEQRRRGEG-----  
 TGD0M2\_290225 PSGQVALERLALDQGGGALRALAARRSFSSSLSGGTTSSNEEETGK--ETGDAAGREAGNEERGERANSRRALLGRDA--DSRLFLEQRRRGEG-----  
 BN1205\_083850 PSGQVALERLALDQGGGALRALAARRSFSSSLSGGTTSSNEEETGK--ETGDAAGREAGNEERGERANSRRALLGRDA--DSRLFLEQRRRGEG-----  
 HHA\_290225 PSGQVALERLALDQGGGALRALAARRSFSSSLSGGTTSSNEEETGK--ETGDAAGREAGNEER-ERTNSRRLLCRDA-EDTRFFLQQGRRGEGTKEEEE-----  
 ETH\_00000110 -----VHRLFSSSPSSPSVDS-----  
 ENH\_0020460 -----VHRLFSSSPSSPSVDS-----  
 EMWEY\_00023200 -----IHRFLSSS-----  
 Hs\_RAF1 -----HEHCSTKVPTMC-----  
 Pa\_RAF1 -----HEHCSTKVPTMC-----  
 Mm\_RAF1 -----HEHCSTKVPTMC-----  
 Rn\_RAF1 -----HEHCSTKVPTMC-----  
 Bt\_RAF1 -----HEHCSTKVPTMC-----  
 Gg\_RAF1 -----HEHCSTKVPTMC-----  
 Xl\_RAF1 -----HEHCSTKVPTMC-----  
 Ce\_RAF1 -----HQRCSFAPLYCDLLQSV-----  
 GNI\_162980 -----QESWGSGEEDRGTQKREPGAEDRGRDVSVDLPSQGDQAGSSAFGRFSQNAQDGRK-----IPPGRERRGVFRSQNF-----

1010 1020 1030 1040 1050 1060 1070 1080 1090 1100  
 PF3D7\_1106800 -----KETKKFNNMDK-----KYIDLAIHKNVK-----N  
 PFIT\_1107600 -----KETKKFNNMDK-----KYIDLAIHKNVK-----N  
 PPRFG01\_1107500 -----KETKKFNNMDK-----KYIDLAIHKNVK-----N  
 PRCDC\_1105300 -----KTKKKFNNMDK-----KTNK-----KIQQHGYIHLAIHKNVK-----N  
 PRG01\_1104000 -----KQTKKFNNMDK-----KYIHLAIHKNVK-----N  
 PBILCG01\_1104000 -----KERKKLNNIDK-----KYIDLAIHKNVN-----N  
 PBLACG01\_1104300 -----KDRKILNNMDK-----KYIDLAIHKNVK-----N  
 PADL01\_1105000 -----E-TKKSNNMDK-----KYIDLAIHKNVK-----N  
 PGABG01\_1103900 -----EKKKKSNNMHK-----KYIHLAIHENVK-----N  
 PGSY75\_1106800 -----EKKKKSNNMHK-----KYIHLAIHENVK-----N  
 PGAL8A\_00334100 -----NDKPEINNASKNSN-----SLLF-----NLNKETEEMNKHINSK-----DALFLDG  
 PRELSG\_0904000 -----NNSTEINSENKNSK-----FLLF-----HLNEGIEEMNKHLHCK-----DVLISEN  
 PccGH01\_09013500 -----ERGKWEWGDWR-----KEER-----RKNGKEEREDKQKQKQKVSFFIKGTPDAKFSQR  
 PYYM\_0941700 -----TTSSQAEDFQKNKK-----KI-----MSNQTKSMIDQKNDD-----NKSFSDK  
 PY02790 -----TTSSQAEDFQKNKK-----KI-----MSNQTKSMIDQKNDD-----NKSFSDK  
 PY02791 -----TTSSQAEDFQKNKK-----KI-----IMNQIKSMIDQKNDD-----DKSFSDK  
 PBANKA\_0940100 -----TSSSQIDIFQKDDQ-----KII-----MKNQIKSMINQKNVN-----DKSFSDK  
 PCHAS\_0904200 -----TSSSQIDIFQKDDQ-----KII-----MKNQIKSMINQKNVN-----DKSFSDK  
 PCHAS\_090420 -----TSSSQIDIFQKDDQ-----KII-----MKNQIKSMINQKNVN-----DKSFSDK  
 YYE\_02751 -----MSSSQIDIFQKDDQ-----KII-----MKNQIKSMINQKNVN-----DKSFSDK  
 YYG\_01693 -----MSSSQIDIFQKDDQ-----KII-----MKNQIKSMINQKNVN-----DKSFSDK  
 PmUG01\_09016400 -----EEEQKEEENQRGEN-----KIH-----PTAVTNQASASEQNLE-----DAQVNS  
 C922\_04039 -----SHQTHQSKH-----KLTTLGEPPTSSAPPEKEAEAVFTKMLHN-----GNAINQEK  
 PcyM\_0908600 -----PSPDSQQIHQCKH-----KLTTLGEPPTSSAPPEEAEAVFTKMLHS-----GDAVCEE  
 PKNOH\_S120122800 -----PPPNSQ--QSKH-----MLTLGEPITSDAPPEEE--VPVLTKKILYN-----GDAVQEE  
 PKNH\_0904400 -----PPPNSQ--QSKH-----MLTLGEPITSDAPPEEE--VPVLTKKILYN-----GDAVQEE  
 PVP01\_0907600 -----PPPSIQPIKQSKHIQHIIQIQPIQPIQPIQPIQPIQSIQPIQKLPLEPPTSRAPPEEE--AAVLTQKMLRS-----GGALYQEE  
 PVX\_091015 -----PPPSIQPIKQSKH--IQIQIQPIQSIQSIQIPIQSIQIPIQKLPLEPPTSRAPPEEE--AAVLTQKMLRS-----GGALYQEE  
 THRCLA\_22740 -----ASEASTHSPASAKS-----PHVGAGARQ-----PRCRRRVRVRQKGGG-----A  
 THRCLA\_04632 -----RGESEAFKLRPTA-----AGART--CTECGGDFSRQDRDKEGAF-----G-----GDE  
 BESB\_019990 -----PREEWEETESSAS-----RISGGACD--ACTPREQDRKLEVDSECH-----SKKDGE  
 BN1204\_042460 -----PREEWEETESSAS-----RISGGACD--ACTPREQDRKLEVDSECH-----SKKDGE  
 TGGT1\_290225 -----PREEWEETESSAS-----RISGGACD--ACTPREQDRKLEVDSECH-----SKKDGE  
 TGD0M2\_290225 -----PREEWEETESSAS-----RISGGACD--ACTPREQDRKLEVDSECH-----SKKDGE  
 BN1205\_083850 -----KENEKEEWEETESSAS-----GVSSGARD--ACRPREQDLKQVDSERH-----GKKGHE  
 HHA\_290225 -----KENEKEEWEETESSAS-----GVSSGARD--ACRPREQDLKQVDSERH-----GKKGHE  
 ETH\_00000110 -----KENEKEEWEETESSAS-----GVSSGARD--ACRPREQDLKQVDSERH-----GKKGHE  
 ENH\_0020460 -----KENEKEEWEETESSAS-----GVSSGARD--ACRPREQDLKQVDSERH-----GKKGHE  
 EMWEY\_00023200 -----KENEKEEWEETESSAS-----GVSSGARD--ACRPREQDLKQVDSERH-----GKKGHE  
 Hs\_RAF1 -----KENEKEEWEETESSAS-----GVSSGARD--ACRPREQDLKQVDSERH-----GKKGHE  
 Pa\_RAF1 -----KENEKEEWEETESSAS-----GVSSGARD--ACRPREQDLKQVDSERH-----GKKGHE  
 Mm\_RAF1 -----KENEKEEWEETESSAS-----GVSSGARD--ACRPREQDLKQVDSERH-----GKKGHE  
 Rn\_RAF1 -----KENEKEEWEETESSAS-----GVSSGARD--ACRPREQDLKQVDSERH-----GKKGHE  
 Bt\_RAF1 -----KENEKEEWEETESSAS-----GVSSGARD--ACRPREQDLKQVDSERH-----GKKGHE  
 Gg\_RAF1 -----KENEKEEWEETESSAS-----GVSSGARD--ACRPREQDLKQVDSERH-----GKKGHE  
 Xl\_RAF1 -----KENEKEEWEETESSAS-----GVSSGARD--ACRPREQDLKQVDSERH-----GKKGHE  
 Ce\_RAF1 -----KENEKEEWEETESSAS-----GVSSGARD--ACRPREQDLKQVDSERH-----GKKGHE  
 GNI\_162980 LCYTRMSQSEGSLEPGGV-----SPARAGAHTCAGHACSGQSSLSVQQCAT-----AAGTTTA

1110 1120 1130 1140 1150 1160 1170 1180 1190 1200  
 PF3D7\_1106800 IQNDTF-----YNKHENI--YNC-----KNQTNFIYQNDSEI-----KKIMN  
 PFIT\_1107600 IQNDTF-----YNKHENI--YNC-----KNQTNFIYQNDSEI-----KKIMN  
 PPRFG01\_1107500 IQNDTF-----YNKHENI--YNC-----KNQTNFIYQNDSEI-----KNIMN  
 PRCDC\_1105300 IQNDTF-----YNKDENI--YNC-----KNQTNFIHQYSEI-----KKIVN  
 PRG01\_1104000 IQNDTF-----YNKDENI--YNC-----KNQTNFIHQYSEI-----KKIVN  
 PBILCG01\_1104000 IQDDTF-----YNKDENI--YNC-----KYQKNFSHQNDSEK-----KNLMN  
 PBLACG01\_1104300 IQDDTF-----YNKDEHI--YNC-----KNQKYIYHQNDSEK-----KYTMN  
 PADL01\_1105000 IKNDTF-----QYNDNI--NNC-----KNQKNYIHQNDYEN-----KNIMN  
 PGABG01\_1103900 IKNDTF-----QYNDNI--NNC-----KNQKNYIQQNDYEN-----INIMN



PGSY75\_1106800 IKNDTF-----QYNDNI--NNC-----KNQNYIQQNDYEN-----INIMN  
 PGAL8A\_00334100 INSFTY-----VSSDSM--SKS-----NKIENCAPE-----INLDNTTINYIKEA-----NIHTKKKK  
 PRELSG\_0904000 LNSFTC-----VSSNSI--RKP-----NKIENGASE-----INLDNPTLNYIKET-----NTYAKKKKK  
 PccGH01\_09013500 KNRKSR-----EKNSST--ASS--GVSGHGGFFLRRKLLRGAGDQ--YPSNSADICTSTSHNP--G-----QDIQKERTD  
 PYYM\_0941700 IKNGFF-----KGNTNI--KNL-----QNLQNLVINSIWN-----  
 PY02790 IKNGFF-----KGNTNI--KNL-----QNLQNLVINSIWN-----  
 PY02791 -----  
 PBANKA\_0940100 IKNGFF-----KGNTNI-----RNLQNLVINSIWN-----  
 PCHAS\_0904200 IKNGFL-----QGNTNI-----KNLQNFVINTIWD-----  
 PCHAS\_090420 IKNGFL-----QGNTNI-----KNLQNFVINTIWD-----  
 YYE\_02751 IKNGFL-----QGNTNI-----KNLQNFVINTIWD-----  
 YYG\_01693 IKNGFL-----QGNTNI-----KNLQNFVINTIWD-----  
 PmUG01\_09016400 INRDITPPMEKNIINDKKKTST--SKPINSICST--MPYNCVDSKQKKGHTIKFIEDKSTIYRCIENA--GI--RNEENGWAGKTTD  
 C922\_04039 DPNSCT--STSTSTSTSTSF--NSP-----RTLKEEAYCKREEL--G--EEDAEEHHH  
 PcyM\_0908600 DPNSC--TSTTSF--NST-----RTLKEEDYCKREEL--G--EEDAEEHHH  
 PKNOH\_s120122800 DPNSC--TSTTSF--NST-----RTLKEEVYCKMEKL--G--EQHAEQHHL  
 PKNH\_0904400 DPNSC--TSTTSF--NST-----RTLKEEVYCKMEKL--G--EQHAEQHHL  
 PVP01\_0907600 DPNSC--TSTTSF--NST-----HTLKE--EEV--G--EQAQEGHHQ  
 PVX\_091015 DPNSC--TSTTSF--NST-----HTLKE--EEV--G--EQAQEGHHQ  
 THRCLA\_22740 -----  
 THRCLA\_04632 -----  
 BESB\_019990 -----DSASPCFLQLSP-----SP-----PFLS--G--EPAEVAAPPR-D  
 BN1204\_042460 GRVPSL-----VGAAQV--PGP-----PGLRNE--RG--GRHGRGEAR  
 TGGT1\_290225 AKALSS-----RGYEEVFLVESP-----HAPQ-----PGTNNEGNTENQEVIAEAA-SCRRGMEAVLPPGEESETKRVR  
 TGD0M2\_290225 AKALSS-----RGYEEVFLVESP-----HAPQ-----PGTNNEGNTENQEVIAEAA-SCRRGMEAVLPPGEESETKRVR  
 BN1205\_083850 AKALSS-----RGYEEVFLVESP-----HAPQ-----PGTNNEGNTENQEVIAEAA-SCRRGMEAVLPPGEESETKRVR  
 HHA\_290225 AKASSF-----RGYEEVSL-KSP-----HAPQ-----PETHNGENTENQEVIAEAA-SCRRGMEAVLPPGEESETKHVR  
 ETH\_00000110 -----QAAYSL--RGSF-----G-----  
 ENH\_0020460 -----QTAYSL--RGSF-----G-----  
 EMWEY\_00023200 -----G-----  
 Hs\_RAF1 -----VDWSNI-----  
 Pa\_RAF1 -----VDWSNI-----  
 Mm\_RAF1 -----VDWSNI-----  
 Rn\_RAF1 -----VDWSNI-----  
 Bt\_RAF1 -----VDWSNI-----  
 Gg\_RAF1 -----VDWSNI-----  
 Xl\_RAF1 -----VDWSNI-----  
 Ce\_RAF1 -----F-----GIASQV--EGP-----  
 GNI\_162980 AGATTA-----ADATTV--AGA-----TTAAGATTAAGATTA--AGV--TTSAAVCPCCQ

1210 1220 1230 1240 1250 1260 1270 1280 1290 1300  
 .....|

PF3D7\_1106800 KKKVSF-----EYDN--  
 PFIT\_1107600 KKKVSF-----EYDN--  
 PPRFG01\_1107500 KKKVSF-----EYDN--  
 PRCDC\_1105300 KKKVSF-----EHDN--  
 PRG01\_1104000 KKKVSF-----EHDN--  
 PBILCG01\_1104000 KKKVSF-----EHDN--  
 PBLACG01\_1104300 KKKVSF-----EYDN--  
 PADL01\_1105000 KKNLSF-----KYDN--  
 PGABG01\_1103900 KKNLSF-----KYDN--  
 PGSY75\_1106800 KKK-----KKKIR-----KKKGE-----QINE  
 PGAL8A\_00334100 KKKKE-----KKMRENEE--KEKEE--NKKE  
 PRELSG\_0904000 ERKDSFD--CQT--VYTTREKIRAQSA--EDEKEGSI--CHLRE  
 PccGH01\_09013500 KSKDEF-----KIPINENNIP--MKIEKKG--ELNT  
 PYYM\_0941700 KSKDEF-----KIPINENNIP--MKIEKKG--ELNT  
 PY02790 -----  
 PY02791 -----  
 PBANKA\_0940100 KSKDEF-----KIPIDENNVP--MNIKKG--ELNT  
 PCHAS\_0904200 KNKDEF-----EKPIENNIP--IHVEKEK--ELNT  
 PCHAS\_090420 KNKDEF-----EKPIENNIP--IHVEKEK--ELNT  
 YYE\_02751 KNKDEF-----EKPIENNIP--MHIEKEK--ELNT  
 YYG\_01693 KNKDEF-----EKPIENNIP--MHIEKEK--ELNT  
 PmUG01\_09016400 QSKKEEVEE-GT--DKCRTNGSIEVSLIKKKKKEEKDDVDRARKGE-TTNHVEKTGKGLNNHVDGTGQMELNHHVDGTGQMELNHHV  
 C922\_04039 QQ-----QK-----RHHVGETSAP--NEPPEPQ--TPND  
 PcyM\_0908600 HQQQQR--RKQK--RQHVGETSAP--NEPVGPP--TPSD  
 PKNOH\_s120122800 QE-----RVCDRSAP--NEPVCHP--TSND  
 PKNH\_0904400 QE-----RVCDRSAP--NEPVCHP--TSND  
 PVP01\_0907600 KR-----QK--WQHAEGSSAP--NEPQEP--RPND  
 PVX\_091015 KR-----QK--WQHAEGSSAP--NEPQEP--RPND  
 THRCLA\_22740 -----  
 THRCLA\_04632 -----  
 BESB\_019990 APSRRLSA--CASAG--LFRGTGGAVP--AGPLGRL--LAPAS  
 BN1204\_042460 LPQSHASS--CCDTSQ--LFRGTGGAVP--AGPLGRL--ALPSP  
 TGGT1\_290225 PPRPHLAL--CHSSSS--SSRQTFERHPQADPKHLKPPSFFTASSPSP--PRHSSPPSPSPPRHSPSPSPSP  
 TGD0M2\_290225 PPRPHLAL--CHSSSS--SSRQTFERHPQADPKHLKPPSFFTASSPSP--PRHSSPPSPSPPRHSPSPSPSP  
 BN1205\_083850 PPRPHLAL--CHSSSS--SSRQTFERHPQADPKHLKPPSFFTASSPSP--PRHSSPPSPSPPRHSPSPSPSP  
 HHA\_290225 PPRPHLAL--CHPSSS--SSRQAFERHEQADPGHLRPPSFFTASSPSP--PSP  
 ETH\_00000110 -----APPL  
 ENH\_0020460 -----APPL  
 EMWEY\_00023200 -----  
 Hs\_RAF1 --RQL--L--LFPNS--



```

YYG_01693 -----SESSNT-S-ITQTLSTSSDSSFTN-IHSDDESSKI-
PmUG01_09016400 -----SDSALE-VSVTSSLSSFSYTTTTS-GSLTLES-
C922_04039 -----GSSRAYSGAEGKNLAVSDAPKEVPYGSCLSSFSV
PcyM_0908600 -----GNSKDY-SRAGEKRAVSDGPKDDSYGSCSLSSFSI
PKNOH_s120122800 -----GISRIY-SGEGENRALSGDPKDDDYGSCSLSSFSI
PKNH_0904400 -----GISRIY-SGEGENRALSGDPKDDDYGSCSLSSFSI
PVP01_0907600 -----GSSRAY-SGEGANRAAPGDPKDEAYGSCSLSSFSI
PVX_091015 -----GSSRAY-SGEGANRAAPGDPKDEAYGSCSLSSFSI
THRCLA_22740 -----
THRCLA_04632 -----
BESB_019990 -----RRATPKG--KCPLCRRPL-----RPPAPV-S-----SAAPLSGLD-
BN1204_042460 -----TRLRPRH--ACSLCRRSLHAVSFSETLSPG---TPSC-----SSPSASVATGQCSSPHGRPASHS--AGSDGEGA--
TGGT1_290225 -----VRLRPRQ--VCSMCERPLHASEPGRFTSAA---APA-----RSPPASV-SALGGPSPPEGFSASL--PRDSCDGV-
TGDOM2_290225 -----VRLRPRQ--VCSMCERPLHASEPGRFTSPA---APA-----RSPPASV-SALGGPSPPEGFSAFI--PRDSCDGV-
BN1205_083850 -----VRLRPRQ--VCSMCERPLHASEPGRFTSPA---APA-----RSPPASV-SALGGPSPPEGFSAFI--PRDSCDGV-
HHA_290225 -----VRRRPRQ--VCLMCERPLHASEPGRFTSPA---TPA-----RSPPASV-SGLGESSLPGEFSAFP--SRGSCDGV-
ETH_00000110 -----FPG--APRGLS-----YPTTP-----EGPSMGASR-
ENH_0020460 -----LPG--APRGFS-----YPTTP-----EGPSIGASR-
EMWEY_00023200 -----SPG--GPHG-----GPQERY-S-----SSGTLEG-
Hs_RAF1 -----RYS--TPHAFT-----FNTSSPS-----SESSL-
Pa_RAF1 -----RYS--TPHAFT-----FNTSSPS-----SESSL-
Mm_RAF1 -----RYS--TPHAFT-----FNTSSPS-----SESSL-
Rn_RAF1 -----RYS--TPHAFT-----FNTSSPS-----SESSL-
Bt_RAF1 -----RYS--TPHAFT-----FSASSPS-----SESSL-
Gg_RAF1 -----RYS--TPHVFT-----FNTSNPS-----SEGL-
Xl_RAF1 -----RYS--TPHPFS-----FSTPSPV-----SECSL-
Ce_RAF1 -----LSPS--GPYPRD-----RSSAPNINAINDEATVQHNR-----ILDALAEQRL-
GNI_162980 -----VGNLLRVVLSAGLPS--GLPKRVNFTGLP-----RHKSPV-SSLSYDSRVVNFTAASRAATSSADSGR-

1510 1520 1530 1540 1550 1560 1570 1580 1590 1600
PF3D7_1106800 SYEKKLLSSSQSNIEHIK---NLPLDVLS---NNNSSA---NIKIKK---SKSKYNNDKKEQ--K-KLPL-
PFIT_1107600 SYEKKLLSSSQSNIEHIK---NLPLDVLS---NNNSSA---NIKIKK---SKSKYNNDKKEQ--K-KLPL-
PPRF01_1107500 SYEKKLLSSSQSNIEHIK---NLPLDVLS---NNNSSA---NIKIKK---SKSKYNNDKKEQ--K-KLPL-
PRCDC_1105300 SYEKKLLSSSQSNIEHIK---NLPLDVLS---NNNSSA---NIKIKK---SKSKYNNDKKEQ--K-EFPL-
PRG01_1104000 SYEKKLLSSSQSNIEHIK---NLPLDVLS---NNNSSA---NIKIKK---SKSKYNNDKKEQ--K-EFPL-
PBILCG01_1104000 SYEKKLLSSSQSNIEHIK---NLPLDVL---NNNNSE---NIKIKR---SKSKYNGKKEQ--K-KLSF-
PBLACG01_1104300 SYEKKLLSLSHSNIEHIK---NLPLDVLS---NNNSSA---NIKIKR---SKSKYKNDKKQ--K-KLSF-
PADL01_1105000 SYEKKLLSSSQSNIEHIK---NLPLDVLS---NNNNSE---NIKIKR---SKSKYNNDKKQ--K-QFSF-
PGABG01_1103900 SYEKKLLSSSQSNIEHIK---NLPLDILS---NNNNSE---NIKIKR---SKSKYNNDKKKNK-QFSF-
PGSY75_1106800 SYEKKLLSSSQSNIEHIK---NLPLDILS---NNNNNNSE---NIKIKR---SKSKYNNDKKKKKK-QFSF-
PGAL8A_00334100 --SKKKTSLNLSLSSL-----NSSESS---NLKSDL---SSINNLNHNKYNVK-KI-
PRELSG_0904000 --SKKEDSSSSSYSL-----TSSSEL---HLKIDL---SSLSNLNHNQKLIK-KISH-
PocGH01_09013500 --SSTENHSPLSRRS-----NAQKRT---KMKERG---GHKHE-----KPKAFSS-
PYYM_0941700 FHDKREYTSIESNEE-----KPNPNP---NLSLSI---NSKNETNSLNGSNPT-KL-
PY02790 FHDKREYTSIESNEE-----KPNPNP---NLSLSI---NSKNETNSLNGSNPT-KL-
PY02791 -----
PBANKA_0940100 FHDKLEPEPIKPNKE-----KEENNP---NLSPIT---NSKNETNLLNDSNPT-KLQD-
PCHAS_0904200 FHEKREHTSIASNEE-----KEVNEL---NLSSSI---NSKSETNLLNNSPT-KLQN-
PCHAS_090420 FHEKREHTSIASNEE-----KEVNEL---NLSSSI---NSKSETNLLNNSPT-KLQN-
YYE_02751 FHEKREHTSIASNEE-----KEVKEP---NLFPTI---NSKNETNLLNNSPT-KLQN-
YYG_01693 FHEKREHTSIASNEE-----KEIKEP---NLSPSI---NSKSETNLLNNSPT-KLQN-
PmUG01_09016400 --SIRTKTSSLLSVE-----SQSKKI---NPQRI---IYARCKSHMSDKNVKMFSSPLSLPLI-
C922_04039 TSPSAQSSHPDFSSE-----GSIEDTAC---HVSTCE---GESKGGDN---
PcyM_0908600 TSTSSQSSRNHSSE-----ESGEDAS---TLPTCE---GEPKGGTN---
PKNOH_s120122800 TSTFSQSSRPDLSYE-----ESNKDSS---NVPTWQ---GESKGEY---
PKNH_0904400 TSTFSQSSRPDLSYE-----ESNKDSS---NVPTWQ---GESKGEY---
PVP01_0907600 TSTSSQSSGPDLSSE-----ESGESNGT---SVPTCE---EKPKGDN---
PVX_091015 TSTSSQSSGPDLSSE-----DSGESNGT---SVPTCE---EKPKGDN---
THRCLA_22740 -----
THRCLA_04632 -----RRDDHEDSLLSLAYRGLISFSFLIPFHQLIFAEPLHAPAA---AASAQG-----VSARWRGSLGKPVSLKLLPS-
BESB_019990 --ARGEGLSLLSLAFRGFISFSFLIPFHQLTFVQPLSPPSPICSWPSSCSACASCAS-CRETHSRCSTRWQGSWLGKSVCLVLPFALHP--
TGGT1_290225 --VPRDSSSLHSLAFRGFLPFSFLIPFHQLTFIQPLHSPAP---SCSSCSAFASPCRETRW-RRAKWKGSLGKTVCLQLVFPVLLPSCQEEGSP-
TGDOM2_290225 --VPRADSSSLHSLAFRGFLPFSFLIPFHQLTFIQPLHSPAP---SCSSCSAFASPCRETRW-RRAKWKGSLGKTVCLQLVFPVLLPSCQEEGSP-
BN1205_083850 --VPRADSSSLHSLAFRGFLPFSFLIPFHQLTFIQPLHSPAP---SCSSCSAFASPCRETRW-RRAKWKGSLGKTVCLQLVFPVLLPSCQEEGSP-
HHA_290225 --FARGESSSLHSLAFRGFVFPFSFLIPFHQLTFIHPHLSPPP---SCSSCSAFASPCRETRT-RRAKWKGSLGKTVCLQLVPACLLPSCQEEGSP-
ETH_00000110 --CSIDKGTPLGSL-----IPFEQLHFVRCLGRR-----TSVYFGFWLGKEVAIKVFRKQHF-
ENH_0020460 --CSIDKGTPLGSL-----IPFEQLHFVRCLGRR-----TSVYFGFWLGKEVAIKVFRKQHF-
EMWEY_00023200 --AGGQQGAPFSSGGRVG-----SQRQRSTSTPNVHMVS-----GKEVAIKVFRKQHF-
Hs_RAF1 --SQRQRSTSTPNVHMVS-----
Pa_RAF1 --SQRQRSTSTPNVHMVS-----
Mm_RAF1 --SQRQRSTSTPNVHMVS-----
Rn_RAF1 --SQRQRSTSTPNVHMVS-----
Bt_RAF1 --SQRQRSTSTPNVHMVS-----
Gg_RAF1 --SQRQRSTSTPNVHMVS-----
Xl_RAF1 --SQRQRSTSTPNVHMVS-----
Ce_RAF1 EESERDKTGLLSTQARH-----RPHFQSG-----HILSGARM-
GNI_162980 --TSRWSTGAGATA-----TGATAT-----GTNCLG-----TKASEFNT-----RLLSAK-

```





```

PGS75_1106800 INNFFV-KYKKM-----KSRMFKGKYMGEVAIK--ILVVKIKNFKKLHQILYLNLYNMRHSNFVLMGVSISY-----PFIF-IIEYMKNKCLFS
PGAL8A_00334100 KENEV-KYTKL-----KSRVFRGKYMGEVAIK--VLVVKIKNFNKLHKILYKLYLRLHSNIVLMGVSISY-----PFVF-IVYEYLKNCCLFS
PRELSG_0904000 KNKSP-KYRKL-----KSRVFRGKYMGEVAIK--VLVVKIKNFNKLHKILYKLYLRLHSNIVLMGVSISY-----PFVF-IVYEYLKNCCLFS
PocGH01_09013500 EKTST-RYKRL-----HSRVFLGKYMGEVAIK--VLVVKITKFKHLYRILYKLYLRLHSNIVLMGVSISY-----PFLF-IVYEHVKNCLFS
PYYM_0941700 EREKT-KPQKM-----KSRIFRGRYMGEVAIK--VLVGNIKNFNKLHKILYKLYLRLHSNIVLMGVSISY-----PFVF-IIEYKNCCLFS
PY02790 EREKT-KPQKM-----KSRIFRGRYMGEVAIK--VLVGNIKNFNKLHKILYKLYLRLHSNIVLMGVSISY-----PFVF-IIEYKNCCLFS
PY02791 -----
PBANKA_0940100 ERKKT-KPQKM-----KSRVFRGRYMGEVAIK--VLVGNIKNFNKLHKILYKLYLRLHSNIVLMGVSISY-----PFVF-IIEYKNCCLFS
PCHAS_0904200 ERDNI-KPQKM-----KSRVFRGRYMGEVAIK--VLVGNIKNFNKLHKILYKLYLRLHSNIVLMGVSISY-----PFVF-IIEYKNCCLFS
PCHAS_090420 ERDNI-KPQKM-----KSRVFRGRYMGEVAIK--VLVGNIKNFNKLHKILYKLYLRLHSNIVLMGVSISY-----PFVF-IIEYKNCCLFS
YYE_02751 GKEYT-KPQKM-----KSRVFRGRYMGEVAIK--VLVGNIKNFNKLHKILYKLYLRLHSNIVLMGVSISY-----PFVF-IIEYKNCCLFS
YYG_01693 GKENT-KPQKM-----KSRVFRGRYMGEVAIK--VLVGNIKNFNKLHKILYKLYLRLHSNIVLMGVSISY-----PFVF-IIEYKNCCLFS
PmUG01_09016400 NGNTF-NYRKL-----KSRVFKGKYMGEVAIK--VLVVKIKNFYFHKMIYKLYLRLHSNIVLMGVSISY-----PFVF-IVYEYLKNCCLFS
C922_04039 KGDLE-NYRKL-----QSRVFRGKYMGEVAIK--VLVGRVKDFQSIHKIFYKLYLRLHSNIVLMGVSISY-----PFVF-IIEYKNCCLFS
PcyM_0908600 KGDLE-NYRKL-----QSRVFRGKYMGEVAIK--VLVGRVKDFQSIHKIFYKLYLRLHSNIVLMGVSISY-----PFVF-IIEYKNCCLFS
PKNOH_s120122800 KGNLK-NDKIM-----NSRTFRGKYLKGDVAIK--VLVGRVKDFSEIHKIFYKLYLRLHSNIVLMGVSISY-----PFVF-IIEYKNCCLFS
PKNH_0904400 KGNLK-NDKIM-----NSRTFRGKYLKGDVAIK--VLVGRVKDFSEIHKIFYKLYLRLHSNIVLMGVSISY-----PFVF-IIEYKNCCLFS
PVP01_0907600 RGLDQ-NKQVM-----RSRTFRGKYLKGDVAIK--VLVGRVKDFSEIHKIFYKLYLRLHSNIVLMGVSISY-----PFVF-IIEYKNCCLFS
PVX_091015 RGLDQ-NQIVM-----RSRTFRGKYLKGDVAIK--VLVGRVKDFSEIHKIFYKLYLRLHSNIVLMGVSISY-----PFVF-IIEYKNCCLFS
THRCLA_22740 -----
THRCLA_04632 -----
BESB_019990 -----
BN1204_042460 IDALPLSLSSFFPGSAPSSSSSLVAPASGAAI-----PDPLSPRELAVAL-LLYRLSLLRHPHLVLLVGVSEGS-CVVCQGQVWV-AVTEFLPWRSLAF
TGGT1_290225 ASSLS-SFSAF-----SSSACPSAAAFQSRQ-----PFLSHPRAVATL-ILYRLSLLRHPHLVLLVGVSDGA-CPLCGSGPALV-LVTEFLPWRSLAF
TGDOM2_290225 ASSLS-SFSAF-----SSSAFSPFAGGQRLGEV-PRFFSPRELAVAL-ILYRISLLRHPHLVLLVGVSDGA-CTLCGRGPALV-LVTEFLPKRSLF
BN1205_083850 ASSLS-SFSAF-----SSSAFSPFAGGQRLGEV-PRFFSPRELAVAL-ILYRISLLRHPHLVLLVGVSDGA-CTLCGRGPALV-LVTEFLPKRSLF
HHA_290225 ASSLS-SFSAF-----SSSACPSFAGGQPLGEA-RLFSPRELAVAL-ILYRISLLRHPHLVLLVGVSDGV-CTLCGRGPALV-LVTEFLPKRSLF
ETH_00000110 RSMG-----SPRHLSDAAG-KLREK-----LVEVQCNTDILLQQLLQQLRHPHLVLLVGVSLSH-----SFHVCLVMEYLSKGPLGA
ENH_0020460 RSMG-----SPSHLSDAAG-KLREK-----LVEVQCNTDILLQQLLQQLRHPHLVLLVGVSLSH-----SFHVCLVMEYLSKGPLGA
EMWEY_00023200 SGSGF-----AFM-----GGGPKL-----EIEDK-----LLDVLQNTDILLQQLLQQLRHPHLVLLVGVSLSH-----SFHVCLVMEYLSKGPLGM
Hs_RAF1 SGSGF-----TVYKWKHG-DVAVKILKVDPTPEQFQAFRNEAVLKRTRHVNILLFMGYMTK-----DNLA-IVTQWCEGSSLYK
Pa_RAF1 SGSGF-----TVYKWKHG-DVAVKILKVDPTPEQFQAFRNEAVLKRTRHVNILLFMGYMTK-----DNLA-IVTQWCEGSSLYK
Mm_RAF1 SGSGF-----TVYKWKHG-DVAVKILKVDPTPEQFQAFRNEAVLKRTRHVNILLFMGYMTK-----DNLA-IVTQWCEGSSLYK
Rn_RAF1 SGSGF-----TVYKWKHG-DVAVKILKVDPTPEQFQAFRNEAVLKRTRHVNILLFMGYMTK-----DNLA-IVTQWCEGSSLYK
Bt_RAF1 SGSGF-----TVYKWKHG-DVAVKILKVDPTPEQFQAFRNEAVLKRTRHVNILLFMGYMTK-----DNLA-IVTQWCEGSSLYK
Gg_RAF1 SGSGF-----TVYKWKHG-DVAVKILKVDPTPEQFQAFRNEAVLKRTRHVNILLFMGYMTK-----DNLA-IVTQWCEGSSLYK
Xl_RAF1 SGSGF-----TVYKWKHG-DVAVKILKVDPTPEQFQAFRNEAVLKRTRHVNILLFMGYMTK-----DNLA-IVTQWCEGSSLYY
Ce_RAF1 SGSGF-----TVYRGEFFG-TVAIKKLVNDPTPSQMAAFKNEAVLKRTRHVNILLFMGWVRE-----PEIA-IITQWCEGSSLYR
GNI_162980 -----KFEALLPGA-TSSTYRGSWLKTVAIK-----VFTGKLIDSAAWQYCKMLAALAHPNLIQVLGVAMK-----PFLWCVVSEYLSKGLAN

```

2010          2020          2030          2040          2050          2060          2070          2080          2090          2100

```

PF3D7_1106800 YLHCIKYKHVYISTFLLQRYKTLHITQOEKIK-----KTNNINNNNNINNNNNIN-----NNNI-NHNNINNNNNINNNNNINNNNNIN
PFIT_1107600 YLHCIKYKHVYISTFLLQRYKTLHITQOEKIK-----KTNNINNNNNINNNNNIN-----NNNI-NHNNINNNNNINNNNNINNNNNIN
PRRFG01_1107500 YLHCIKYKHVYISTFLLQRYKTLHITQOEKIK-----KTNNINNNNNINNNNNIN-----NNNI-INNNNNINNNNNINNNNNINNNNNIN
PRDC_1105300 YLHCIKYKHVYISTFLLQRYKTLHITQOEKIK-----KTSINN-----
PRG01_1104000 YLHCIKYKHVYISTFLLQRYKTLHITQOEKIK-----KTSINN-----
PBILCG01_1104000 FLHCIKYKHVYISTFLLQRYKTLHITQOEKIK-----KI-----NSNNNNNNIR-----
PBLACG01_1104300 FLHCIKYKHVYISTFLLQRYKTLHITQOEKIK-----KINNNNNNNNNNN-----NNN-----NNNNNNNNNK-----
PADL01_1105000 YLHCIKYKHVYISTFFQKYKTLTYNTQOEEIK-----KINT-----NK-----KK-----
PGABG01_1103900 YLHCIKYKHVYISTFFQKYKTLTYNTQOEEIK-----KINKKN-----KKNKN-----KKN-----KKNKNKNKNK-----
PGS75_1106800 YLHCIKYKHVYISTFFQKYKTLTYNTQOEEIK-----KINKKN-----KKN-----KKN-----KKNKNKNKNK-----
PGAL8A_00334100 YLHCIKYKHVYISKFFKMYNLDLDDKTL-----TDYKSEN-EKII-----YPN-----VRF-SND-----
PRELSG_0904000 YLHCIKYKHVYISNFFKMYNLDLDDKTL-----TDYKSRN-EHKNF-----YSN-----IKSSNN-----
PocGH01_09013500 YLHCIKYKHVYISKYIQKKTINNFNHHKMLL-----CNDYMSSSIDSQM-----YKH-----QKLYKKT-D-KIYDDLIN-----
PYYM_0941700 YLHCIKYKHVYISKLLKYYQ-----KKL-----NSQNSQQ-KNNTI-----FSD-----RKYLSNDD-----
PY02790 YLHCIKYKHVYISKLLKYYQ-----KKL-----NSQNSQQ-KNNTI-----FSD-----RKYLSNDD-----
PY02791 -----
PBANKA_0940100 YLHCVKYKHVYISKLLKYYQ-----KKF-----INQNFQ-QNNTM-----SSD-----RKYISNDDNEKINFDSRNI-L
PCHAS_0904200 YLHCVKYKHVYISKLLKYYQ-----KKF-----PNQNGQQ-----
PCHAS_090420 YLHCVKYKHVYISKLLKYYQ-----KKF-----PNQNGQQ-----
YYE_02751 YLHCIKYKHVYISKLLKYYQ-----KKY-----PNQNDQQ-----
YYG_01693 YLHCIKYKHVYISKLLKYYQ-----KKF-----PNQNDQQ-----
PmUG01_09016400 YLHCIKNEQVYISKFFKMYNLDLDDKTL-----KSGVHKGEST-----KGSNNNSGSSGNSR-----GSS-----RSSGSSGS-----SGSSGS-----
C922_04039 YLHCAGG---YVKDVSVRQHGQGVIAAQA-----N-----ASSISRGGGIS-----
PcyM_0908600 YLHCAGG---YVKDVSVRQHGQGVVTPGLSASSI-----SRGDISAHS-ISRGG-----GIS-----AHSISRGGGIS-----
PKNOH_s120122800 YLHCAGG---YVKDVSVRQHGQGVVTPGLS-----S-----VSTMSREGDIS-----
PKNH_0904400 YLHCAGG---YVKDVSVRQHGQGVVTPGLS-----S-----VSTMSREGDIS-----
PVP01_0907600 YLHCAGG---YAKDLSRQRREGGVRTPLG-----S-----ASSISRGGGIS-----
PVX_091015 YLHCAGG---YAKDLSRQRREGGVRTPLG-----S-----ASSISRGGGIS-----
THRCLA_22740 -----
THRCLA_04632 -----
BESB_019990 -----
BN1204_042460 FFG-----TPLTRP-RQPAGAREAAH-----VGRRORESKREE-----EATIG-----GDERARDGADAR-----
TGGT1_290225 FFD-----SPLHRP-RQLCRPGLYAGDRGVPE-----ESSASLSKNG-----ELK-----SSSADLPKTR-----
TGDOM2_290225 FFD-----APLSRP-RHLPRVLVHATDFVVAAGD-----ESSASLSKNG-----EPT-----DRSTATGAGTCRTQTKPEGDA-----
BN1205_083850 FFD-----APLSRP-RHLPRVLVHATDFVVAAGD-----ESSASLSKNG-----EPT-----DRSTATGAGTCRTQTKPEGDA-----
HHA_290225 FFD-----APLSRP-RHLPRVLVHATDFVVAAGD-----ESSASLSKNG-----EPT-----DRSTATGAGTCRTQTKPEGDA-----
ETH_00000110 HLSPGA---PPLGLPP-RHPMGAFLSHRFAAS-----SAGF-----PHCEASGSPNSGDCSSRCGSSV-----
ENH_0020460 HLSPGA---PHLGLPP-RHPMGAFLSHRFAAS-----SAGF-----PHCEASGSPNSGDCSSRCGSSV-----
EMWEY_00023200 HLSFSP---PSWVPPRRHPPGGGFLQROQQQQQQQQQLQHLGTPLOHSLRHGGDTGD-----SSISPSI-----SHTHSSSRSSSSSSSSSSSGSSP-----
Hs_RAF1 HLHVQ-----

```

Pa\_RAF1 HLHVQ  
 Mm\_RAF1 HLHVQ  
 Rn\_RAF1 HLHVQ  
 Bt\_RAF1 HLHVQ  
 Gg\_RAF1 HLHVQ  
 Xl\_RAF1 HLHVL  
 Ce\_RAF1 HHHVQE  
 GNI\_162980 LFRQPQSRDMPWGGPG--RNNECIIFWQRDHPDRG-----SPRLL-----DREGGSGA-----

2110 2120 2130 2140 2150 2160 2170 2180 2190 2200  
 PF3D7\_1106800 YNKDY-----NNKKKKE-----DEQHNIEHQDTF-IDLPEKSNISSDDNNSTD--ISIQIKENFH--  
 PFIT\_1107600 YNKDY-----NNKKKKE-----DEQHNIEHQDTF-IDLPEKSNISSDDNNSTD--ISIQIKENFH--  
 PPRFG01\_1107500 YNKDY-----NNKKKKE-----DEQHNIEHQDTF-IDLPEKSNISSDDNNSTD--ISIQIKENFH--  
 PRDCDC\_1105300 -DKDY-----ND-KKKE-----DEQHNIDHQDTF-VDLPEKSNISSDDNNSTD--ISIQIKENFH--  
 PRG01\_1104000 -DKDY-----ND-KKKE-----DEQHNIDHQDTF-VDLPEKSNISSDDNNSTD--ISIQIKENFH--  
 PBILCG01\_1104000 -NKDY-----YN-KKKE-----DEHHNIDQDTF-VDLPEKSNISSDDNNSTD--ISIQIKENFN--  
 PBLACG01\_1104300 -NKDY-----NNNNNNQKEEE-EDDNDDEEHNIDHQDTF-VDIPEKCSISSDDNNSTD--ISQMKDNFH--  
 PADL01\_1105000 -KKDY-----NNSNTEE- EVPN--EDQNNIDNQDTF-LDLSQESNISSDDNNSTD--ISIQIKENFH--  
 PGABG01\_1103900 -NKDY-----NNSNKEE- EDTN--EDQNNIDNQDTF-LDLSQESNISSDDNNSTD--ISIQIKENFN--  
 PGSY75\_1106800 -NKDY-----NNSNKEE- EDTN--EDQNNIDNQDTF-LDLSQESNISSDDNNSTD--ISIQIKENFN--  
 PGAL8A\_00334100 -KVL-----NDKK-----SIKNCNNDKNSK-----FIQIESFNFN--  
 PRELSG\_0904000 -SKVL-----NDKN-----NIKNSDSDKNNLK-----FPEVGSKFFN--  
 PccGH01\_09013500 -NKHIGGKSKGGYVENCEGKNCES- SKNCESSKNCESSKN- CESSKNCESSKNSEN- GKNSENKFL--  
 PYM\_0941700 -----NGKN-----KITKKNLKDQI-----YSPSTSISL--  
 PY02790 -----NGKN-----KITKKNLKDQI-----YSPSTSISL--  
 PY02791 -----NGKN-----KITKKNLKDQI-----YSPSTSISL--  
 PBANKA\_0940100 RNKLL-----EIKCKNNAKN-----KITEKNLKDQI-----YSSSTSISL--  
 PCHAS\_0904200 -----KHDTNNELA-----YSSSASAKSL--  
 PCHAS\_090420 -----KHDTNNELA-----YSSSASAKSL--  
 YYE\_02751 -----KHDQNEQT-----YSSSTSISL--  
 YYG\_01693 -----KHDTKNEQT-----YSSSTSISL--  
 PmUG01\_09016400 -SRSSGSSGSSGSSRSGNSGNSGSS--GSSGRSGRSGSNASNAAN- AANPNNVRADRNVD- YSSPPNTASHKYDTSSDKGRKMISTDGRE  
 C922\_04039 -----AQSPADNSSTCDSSP-----GYTYPSENPT--  
 PcyM\_0908600 -----AHSSTDDSSSTCDSSP-----GNTSPSENPT--  
 PKNOH\_s120122800 -----AKNSTDNSSCDST-----WNTSHSENPA--  
 PKNH\_0904400 -----AKNSTDNSSCDST-----WNTSHSENPA--  
 PVP01\_0907600 -----AHGSPGNSSTCDSSP-----GGTSPSDNPT--  
 PVX\_091015 -----AHGSPGNSSTCDSSP-----GGTSPSDNPT--  
 THRCLA\_22740 -----  
 THRCLA\_04632 -----  
 BESB\_019990 -RRRA-----AEETRRPLRRGGSAEDAGE- REEASLASSGFTSIRELL- ETVEDERRP- MKGKRQL--  
 BN1204\_042460 -RRER-----GRETRGDVAE- REEITRSGSRNTDED- GRLTL-----  
 TGGT1\_290225 -RRRQTPDQGGSKTLQRQSEKDGRE- EDREREGKREGREARNRADEEARKNVEQGRERRGGKAEREDEKRNVEERREG- QWRRSCL--  
 TGD0M2\_290225 -RRRQTPDQGGSETLQRQSEKDGRE- EDREREGKREGREARNRADEEARKNVEQGRERRGGKAEREDEKRNVEERREG- QWRRSCL--  
 BN1205\_083850 -RRRQTLQGGSETLQRQSEKNGRE- EHREREGKREGREGRDRADEEARKNVEQGRERRGGKAEREDEKRNVEERREG- QWRRSCL--  
 HHA\_290225 -RRRQALDKGGSETLQRQSDTREGE- EDREREEKREGREVRDHADEEAGTVEQGRERRGGKAEREDEKRTVEERREG- DWGRSCL--  
 ETH\_00000110 -ERL-----HCLAPGAPESGQAGCPTA- ASAPVESGSSQDQAVG- ASTERRWKQD- EWGQK--  
 ENH\_0020460 -EQL-----HCLAPGAPESGQAGCATA- ASAPVESGSSQDQAVG- TSTERRWKHD- EWGQK--  
 EMWEY\_00023200 -FRPL-----MGASEGLVPPGGPSTGAPSS- RGAPSVGPPSSGGP-----  
 Hs\_RAF1 -----  
 Pa\_RAF1 -----  
 Mm\_RAF1 -----  
 Rn\_RAF1 -----  
 Bt\_RAF1 -----  
 Gg\_RAF1 -----  
 Xl\_RAF1 -----  
 Ce\_RAF1 -----  
 GNI\_162980 -----EPGGGTAPSEGA-----GSSPGVVGNGVAAGSGVGSRICTGRRRRSGYLPFLFWGPR-----

2210 2220 2230 2240 2250 2260 2270 2280 2290 2300  
 PF3D7\_1106800 -----FLNK-KIEENKNIYDDHTSTLSDHS- IHNINKSYDNVYKKNM- IFHYQH-----NVLC--  
 PFIT\_1107600 -----FLNK-KIEENKNIYDDHTSTLSDHS- IHNINKSYDNVYKKNM- IFHYQH-----NVLC--  
 PPRFG01\_1107500 -----FLNK-KIEENKNIYDDHTSTLSDHS- IHNINKSYDNVYKKNM- IFHYQH-----NVLC--  
 PRDCDC\_1105300 -----FINK-KIEEKGIIYDDHTSTLSDHS- IHNINKSYNNVYKKNM- IFHYEH-----NVLC--  
 PRG01\_1104000 -----FINK-KIEEKGIIYDDHTSTLSDHS- IHNINKSYNNVYKKNM- IFHYEH-----NVLC--  
 PBILCG01\_1104000 -----FLNNKKMEQNKDIIYDDHTSTLSDYS- IDNINKSYNNLYKKNM- IFNCEH-----NVLC--  
 PBLACG01\_1104300 -----LLNN-KIEENKDINCDDLSTLSDQS- IDNINKSFYNNVYKKNM- IFNYEH-----NVLC--  
 PADL01\_1105000 -----YLNN-KIEENKDFNYDDHTSTLSDHS- INNMQSYNDVYKKNM- IFNYEH-----NVLC--  
 PGABG01\_1103900 -----YLNN-KIEENKNFNHYDNTSTLSDHS- INNMQSYNNVYKKNM- IFNYEH-----NVLC--  
 PGSY75\_1106800 -----YLNN-KIEENKNFNHYDNTSTLSDHS- INNMQSYNNVYKKNM- IFNYEH-----NVLC--  
 PGAL8A\_00334100 -----NESSLSLSDNTDFE-KNKRDNKYFKI- NKFN-LFNEN-----NVLC--  
 PRELSG\_0904000 -----NESSLSLSDNTDFE-KNKRDNKYFKI- NKFN-LFNEN-----NVLC--  
 PccGH01\_09013500 -----RSYSLDSFINSTDSLSDDFSFE-LQNKHCNRLTT- DNFN-LYNCEN-----NVLC--  
 PYM\_0941700 -----DTNSSNM--NNKKL- KNKNSNEKRYI- NKIDSMFRNKN-----NILC--  
 PY02790 -----DTNSSNM--NNKKL- KNKNSNEKRYI- NKIDSMFRNKN-----NILC--  
 PY02791 -----DTNSSNM--NNKKL- KNKNSNEKRYI- NKIDSMFRNKN-----NILC--  
 PBANKA\_0940100 -----DTNSSNM--NNTKL- KNINFNKNRYI- NKIHSMFRNKN-----NILC--  
 PCHAS\_0904200 -----DTNSSNM--NNTKL- KNINFNKNRYI- NKIHSMFRNKN-----NILC--  
 PCHAS\_090420 -----DTNSSNM--NNTKL- KNINFNKNRYI- NKIHSMFRNKN-----NILC--  
 YYE\_02751 -----DTNSSNM--NNIKV- KNKNSNKRYI- NKINSTFRNKN-----NILC--





|                  |                      |                                   |                          |
|------------------|----------------------|-----------------------------------|--------------------------|
| PF3D7_1106800    | -----QNTDHNIEQI----- | -----NECNKYASETKYNIKKSNLKNNI----- | -----ISHKNFQKCNQIQMNPYTF |
| PFIT_1107600     | -----QNTDHNIEQI----- | -----NECNKYASETKYNIKKSNLKNNI----- | -----ISHKNFQKCNQIQMNPYTF |
| PRFG01_1107500   | -----QNTDHNIEQI----- | -----NECNKYASETKYNIKKSNLKNNI----- | -----ISHKNFQKCNQIQMNPYTF |
| PRCDC_1105300    | -----QNTDHNIEQI----- | -----NECNKYASETKYTIKKSNLKNNI----- | -----ISHKNFQKCNQIQMNPYTF |
| PRG01_1104000    | -----QNTDHNIEQI----- | -----NECNKYASETKYTIKKSNLKNNI----- | -----ISHKNFQKCNQIQMNPYTF |
| PBILCG01_1104000 | -----QNTDHNIEQI----- | -----NECNKYASETKYTIKKSNLKNNI----- | -----ISHKNFQKCNQIQMNPYTF |
| PBLACG01_1104300 | -----QNTDHNIEQI----- | -----NECNKYASETKYTIKKSNLKNNI----- | -----ISHKNFQKCNQIQMNPYTF |
| PADL01_1105000   | -----QNTDHNIEQI----- | -----NECNKYASETKYTIKKSNLKNNI----- | -----ISHKNFQKCNQIQMNPYTF |
| PGABG01_1103900  | -----QNTDHNIEQI----- | -----NECNKYASETKYTIKKSNLKNNI----- | -----ISHKNFQKCNQIQMNPYTF |
| PGSY75_1106800   | -----QNTDHNIEQI----- | -----NECNKYASETKYTIKKSNLKNNI----- | -----ISHKNFQKCNQIQMNPYTF |
| PGAL8A_00334100  | -----QNTDHNIEQI----- | -----NECNKYASETKYTIKKSNLKNNI----- | -----ISHKNFQKCNQIQMNPYTF |
| PRELSG_0904000   | -----QNTDHNIEQI----- | -----NECNKYASETKYTIKKSNLKNNI----- | -----ISHKNFQKCNQIQMNPYTF |
| PocGH01_09013500 | -----QNTDHNIEQI----- | -----NECNKYASETKYTIKKSNLKNNI----- | -----ISHKNFQKCNQIQMNPYTF |
| PYYM_0941700     | -----QNTDHNIEQI----- | -----NECNKYASETKYTIKKSNLKNNI----- | -----ISHKNFQKCNQIQMNPYTF |
| PY02790          | -----QNTDHNIEQI----- | -----NECNKYASETKYTIKKSNLKNNI----- | -----ISHKNFQKCNQIQMNPYTF |
| PY02791          | -----QNTDHNIEQI----- | -----NECNKYASETKYTIKKSNLKNNI----- | -----ISHKNFQKCNQIQMNPYTF |
| PBANKA_0940100   | -----QNTDHNIEQI----- | -----NECNKYASETKYTIKKSNLKNNI----- | -----ISHKNFQKCNQIQMNPYTF |
| PCHAS_0904200    | -----QNTDHNIEQI----- | -----NECNKYASETKYTIKKSNLKNNI----- | -----ISHKNFQKCNQIQMNPYTF |
| PCHAS_090420     | -----QNTDHNIEQI----- | -----NECNKYASETKYTIKKSNLKNNI----- | -----ISHKNFQKCNQIQMNPYTF |
| YYE_02751        | -----QNTDHNIEQI----- | -----NECNKYASETKYTIKKSNLKNNI----- | -----ISHKNFQKCNQIQMNPYTF |
| YYG_01693        | -----QNTDHNIEQI----- | -----NECNKYASETKYTIKKSNLKNNI----- | -----ISHKNFQKCNQIQMNPYTF |
| PmUG01_09016400  | -----QNTDHNIEQI----- | -----NECNKYASETKYTIKKSNLKNNI----- | -----ISHKNFQKCNQIQMNPYTF |
| C922_04039       | -----QNTDHNIEQI----- | -----NECNKYASETKYTIKKSNLKNNI----- | -----ISHKNFQKCNQIQMNPYTF |
| PcyM_0908600     | -----QNTDHNIEQI----- | -----NECNKYASETKYTIKKSNLKNNI----- | -----ISHKNFQKCNQIQMNPYTF |
| PKNOH_s120122800 | -----QNTDHNIEQI----- | -----NECNKYASETKYTIKKSNLKNNI----- | -----ISHKNFQKCNQIQMNPYTF |
| PKNH_0904400     | -----QNTDHNIEQI----- | -----NECNKYASETKYTIKKSNLKNNI----- | -----ISHKNFQKCNQIQMNPYTF |
| PVP01_0907600    | -----QNTDHNIEQI----- | -----NECNKYASETKYTIKKSNLKNNI----- | -----ISHKNFQKCNQIQMNPYTF |
| PVX_091015       | -----QNTDHNIEQI----- | -----NECNKYASETKYTIKKSNLKNNI----- | -----ISHKNFQKCNQIQMNPYTF |
| THRCLA_22740     | -----QNTDHNIEQI----- | -----NECNKYASETKYTIKKSNLKNNI----- | -----ISHKNFQKCNQIQMNPYTF |
| THRCLA_04632     | -----QNTDHNIEQI----- | -----NECNKYASETKYTIKKSNLKNNI----- | -----ISHKNFQKCNQIQMNPYTF |
| BESB_019990      | -----QNTDHNIEQI----- | -----NECNKYASETKYTIKKSNLKNNI----- | -----ISHKNFQKCNQIQMNPYTF |
| BN1204_042460    | -----QNTDHNIEQI----- | -----NECNKYASETKYTIKKSNLKNNI----- | -----ISHKNFQKCNQIQMNPYTF |
| TGGT1_290225     | -----QNTDHNIEQI----- | -----NECNKYASETKYTIKKSNLKNNI----- | -----ISHKNFQKCNQIQMNPYTF |
| TGDOM2_290225    | -----QNTDHNIEQI----- | -----NECNKYASETKYTIKKSNLKNNI----- | -----ISHKNFQKCNQIQMNPYTF |
| BN1205_083850    | -----QNTDHNIEQI----- | -----NECNKYASETKYTIKKSNLKNNI----- | -----ISHKNFQKCNQIQMNPYTF |
| HHA_290225       | -----QNTDHNIEQI----- | -----NECNKYASETKYTIKKSNLKNNI----- | -----ISHKNFQKCNQIQMNPYTF |
| ETH_00000110     | -----QNTDHNIEQI----- | -----NECNKYASETKYTIKKSNLKNNI----- | -----ISHKNFQKCNQIQMNPYTF |
| ENH_0020460      | -----QNTDHNIEQI----- | -----NECNKYASETKYTIKKSNLKNNI----- | -----ISHKNFQKCNQIQMNPYTF |
| EMWEY_00023200   | -----QNTDHNIEQI----- | -----NECNKYASETKYTIKKSNLKNNI----- | -----ISHKNFQKCNQIQMNPYTF |
| Hs_RAF1          | -----QNTDHNIEQI----- | -----NECNKYASETKYTIKKSNLKNNI----- | -----ISHKNFQKCNQIQMNPYTF |
| Pa_RAF1          | -----QNTDHNIEQI----- | -----NECNKYASETKYTIKKSNLKNNI----- | -----ISHKNFQKCNQIQMNPYTF |
| Mm_RAF1          | -----QNTDHNIEQI----- | -----NECNKYASETKYTIKKSNLKNNI----- | -----ISHKNFQKCNQIQMNPYTF |
| Rn_RAF1          | -----QNTDHNIEQI----- | -----NECNKYASETKYTIKKSNLKNNI----- | -----ISHKNFQKCNQIQMNPYTF |
| Bt_RAF1          | -----QNTDHNIEQI----- | -----NECNKYASETKYTIKKSNLKNNI----- | -----ISHKNFQKCNQIQMNPYTF |
| Gg_RAF1          | -----QNTDHNIEQI----- | -----NECNKYASETKYTIKKSNLKNNI----- | -----ISHKNFQKCNQIQMNPYTF |
| Xl_RAF1          | -----QNTDHNIEQI----- | -----NECNKYASETKYTIKKSNLKNNI----- | -----ISHKNFQKCNQIQMNPYTF |
| Ce_RAF1          | -----QNTDHNIEQI----- | -----NECNKYASETKYTIKKSNLKNNI----- | -----ISHKNFQKCNQIQMNPYTF |
| GNI_162980       | -----QNTDHNIEQI----- | -----NECNKYASETKYTIKKSNLKNNI----- | -----ISHKNFQKCNQIQMNPYTF |

  

|                  |                                         |       |                              |           |      |      |      |      |      |      |
|------------------|-----------------------------------------|-------|------------------------------|-----------|------|------|------|------|------|------|
|                  | 2510                                    | 2520  | 2530                         | 2540      | 2550 | 2560 | 2570 | 2580 | 2590 | 2600 |
| PF3D7_1106800    | PPYQKELSSYLK-NEKIKRKRKVLFSYLKTHIHFNSSQ  | INDQ  | HNRLSVQKIMKIIT-DVTLACTYLEKEK | MSPINLKPT |      |      |      |      |      |      |
| PFIT_1107600     | PPYQKELSSYLK-NEKIKRKRKVLFSYLKTHIHFNSSQ  | INDQ  | HNRLSVQKIMKIIT-DVTLACTYLEKEK | MSPINLKPT |      |      |      |      |      |      |
| PRFG01_1107500   | PPYQKELSSYLK-NEKTKRKRKVLFSYLKTHIHFNSSQ  | INDQ  | HNRLSVQKIMKIIT-DVTLACTYLEKEK | MSPINLKPT |      |      |      |      |      |      |
| PRCDC_1105300    | PPYQKELSSYLK-NEKTKRKRKVLFSYLKTHIHFNSSQ  | INDQ  | HNRLSVQKIMKIIT-DVTLACTYLEKEK | MSPINLKPT |      |      |      |      |      |      |
| PRG01_1104000    | PPYQKELSSYLK-NEKTKRKRKVLFSYLKTHIHFNSSQ  | INDQ  | HNRLSVQKIMKIIT-DVTLACTYLEKEK | MSPINLKPT |      |      |      |      |      |      |
| PBILCG01_1104000 | PPYQKELSSYLK-NEKAKMRRKVLFSYLKTHIHFNSSQ  | INDQ  | HNRLSVQKIMKIIT-DVTLACTYLEKEK | MSPINLKPT |      |      |      |      |      |      |
| PBLACG01_1104300 | PPYQKELSSYLK-NEKAKRKRKVLFSYLKTHIHFNSSQ  | INDQ  | HNRLSVQKIMKIIT-DVTLACTYLEKEK | MSPINLKPT |      |      |      |      |      |      |
| PADL01_1105000   | PPYQKELSSYLK-NEKAKMRRKVLFSYLKTHIHFNSSQ  | VNDQ  | NDRLSVQKIMKIIT-DVTLACTYLEKEK | MSPINLKPT |      |      |      |      |      |      |
| PGABG01_1103900  | PPYQKELSSYLK-NEKAKMRRKVLFSYLKTHIHFNSSQ  | VNDQ  | NDRLSVQKIMKIIT-DVTLACTYLEKEK | MSPINLKPT |      |      |      |      |      |      |
| PGSY75_1106800   | PPYQKELSSYLK-NEKAKMRRKVLFSYLKTHIHFNSSQ  | VNDQ  | NDRLSVQKIMKIIT-DVTLACTYLEKEK | MSPINLKPT |      |      |      |      |      |      |
| PGAL8A_00334100  | PPYQRELLSYLK-NEKAKMRRKVLFSYLKTHIHFNSSQ  | SNFR  | NNRLSVQKIMKIIT-DVTLACTYLEKEK | LYPLNLKPT |      |      |      |      |      |      |
| PRELSG_0904000   | PPYQRELLSYLK-KEKAKMRRKVLFSYLKTHIHFNSSQ  | SNFR  | NNRLSVQKIMKIIT-DVTLACTYLEKEK | LYPLNLKPT |      |      |      |      |      |      |
| PocGH01_09013500 | PPFHRELLLVK-RKKAKQTKKVLFSYLKTHIHFNSSQ   | CDTR  | KNKLSDHQMMKII-DITLACSYLEKQK  | IRWLNKPT  |      |      |      |      |      |      |
| PYYM_0941700     | PPLQEDFNFYK--EKKKKKKKILFSYLKTHSYFSSK    | CDTR  | KNKLSDHQMMKII-DITLACSYLEKQK  | IRWLNKPT  |      |      |      |      |      |      |
| PY02790          | PPLQEDFNFYK--EKKKKKKKILFSYLKTHSYFSSK    | CDTR  | KNKLSDHQMMKII-DITLACSYLEKQK  | IRWLNKPT  |      |      |      |      |      |      |
| PY02791          |                                         |       | ITLACSYLEKQK                 | IRWLNKPT  |      |      |      |      |      |      |
| PBANKA_0940100   | PPLQEDFNFYK--EKKKKKKKILFSYLKTHSYFSSK    | CDTR  | KNKLSDHQMMKII-DITLACSYLEKQK  | IRWLNKPT  |      |      |      |      |      |      |
| PCHAS_0904200    | PPLQEDLNIFYF--EKKKQKNKILFSYLKTHSYFSSK   | CDTR  | KNKLSDHQMMKII-DITLACSYLEKQK  | IRWLNKPT  |      |      |      |      |      |      |
| PCHAS_090420     | PPLQEDLNIFYF--EKKKQKNKILFSYLKTHSYFSSK   | CDTR  | KNKLSDHQMMKII-DITLACSYLEKQK  | IRWLNKPT  |      |      |      |      |      |      |
| YYE_02751        | PPLQEDLNIFYF--EKKKQKNKILFSYLKTHSYFSSK   | CDTR  | KNKLSDHQMMKII-DITLACSYLEKQK  | IRWLNKPT  |      |      |      |      |      |      |
| YYG_01693        | PPLQEDLNIFYF--EKKKQKNKILFSYLKTHSYFSSK   | CDTR  | KNKLSDHQMMKII-DITLACSYLEKQK  | IRWLNKPT  |      |      |      |      |      |      |
| PmUG01_09016400  | PEFQKELSSYLK--RKKKKKKKILFSYLKTHSYFSSK   | NTRF  | NNRLSVQKIMKIIT-DITLACSYLEKQK | LYPLNLKPT |      |      |      |      |      |      |
| C922_04039       | PPFEKELCLYIK-RQKAKQTKKVLFSYLKTHIHFNSSQ  | SALKA | DRRLSVQKIMKIIT-DVTLACSYLEKHL | SHPLNLKPT |      |      |      |      |      |      |
| PcyM_0908600     | PPFEKELSLYVK-KQKAKQTKKVLFSYLKTHIHFNSSQ  | SPLKA | DRRLSVQKIMKIIT-DVTLACSYLEKHL | SHPLNLKPT |      |      |      |      |      |      |
| PKNOH_s120122800 | PPFDKELSLYVK-KQKAKQTKKVLFSYLKTHIHFNSSQ  | NALKK | DRRLSVQKIMKIIT-DVTLACSYLEKHL | SHPLNLKPT |      |      |      |      |      |      |
| PKNH_0904400     | PPFDKELSLYVK-KQKAKQTKKVLFSYLKTHIHFNSSQ  | NALKK | DRRLSVQKIMKIIT-DVTLACSYLEKHL | SHPLNLKPT |      |      |      |      |      |      |
| PVP01_0907600    | PPFEKELSLYVK-KQKAKQTKKVLFSYLKTHIHFNSSQ  | SPLKE | DRRLSVQKIMKIIT-DVTLACSYLEKHL | SHPLNLKPT |      |      |      |      |      |      |
| PVX_091015       | PPFEKELSLYVK-KQKAKQTKKVLFSYLKTHIHFNSSQ  | SPLKE | DRRLSVQKIMKIIT-DVTLACSYLEKHL | SHPLNLKPT |      |      |      |      |      |      |
| THRCLA_22740     |                                         |       | LDMAI-SICRAMSYLHGRN          | HHKDLSSS  |      |      |      |      |      |      |
| THRCLA_04632     |                                         |       | LDMAI-SICRAMSYLHGRN          | HHKDLSSS  |      |      |      |      |      |      |
| BESB_019990      | PKITRETTQAEPPDRTRLRRAKSRDFERRRLREDWKKRA | DAAA  | AFRMDIHSALRLAR-GIALGCAYLQRKG | LYHRLHPG  |      |      |      |      |      |      |

BN1204\_042460 P--DGALRPTPGPARTALQAKSAEFERLRLOHDWRRRS--ASST--RFRLDIHSALRLAR-GIALGCAYLQRKG-----ISRLLELRPG  
 TGGT1\_290225 P--NAELRSAAALP-RTGLKAKSAEFERRRLEHDWRRRT--AAAA-----RFRLDIHSSRLRLAR-GIALGCAYLQRKG-----ISYQLQLRPG  
 TGD0M2\_290225 P--NAELRSAAALP-RTGLKAKSAEFERRRLEHDWRRRT--ATAA-----RFRLDIHSSRLRLAR-GIALGCAYLQRKG-----ISYQLQLRPG  
 BN1205\_083850 P--NAELRSAAALR-RTGLKAKSAEFERRRLEHDWRRRT--AAAA-----RFRLDIHSSRLRLAR-GIALGCAYLQRKG-----ISYQLQLRPG  
 HHA\_290225 P--NAELRSAAALP-RTGLKAKSAEFERRRLEHDWRRRT--AAAA-----RFRLDIHSSRLRLAR-GIALGCAYLQRKG-----ISYQLQLRPG  
 ETH\_00000110 PLGALAKMCGVPPAVAGLRAPCVGHKDRKGGGPHSP-----TR--GPCLPHLLDALNLAR-GIALGCAYLQRQQ-----VYHLQLSPS  
 ENH\_0020460 PLGALAKMCGVPPAVAGLRAPCVGHKDRKGGGLHSP-----TR--GPCLPHLLDALNLAR-GIALGCAYLQRQQ-----VYHLQLSPS  
 EMWEY\_00023200 PLDENAPSGGLPFPAAFGQQQQQQQQQQQQQQQQQQ-----QQQQQQQQQQQQQQQQ-----QQQRPEVSPS  
 Hs\_RAF1 -----ETKQMFQLIDIAR-QTAQGM DYLHAKN-----IIHRDMKSN  
 Pa\_RAF1 -----ETKQMFQLIDIAR-QTAQGM DYLHAKN-----IIHRDMKSN  
 Mm\_RAF1 -----ETKQMFQLIDIAR-QTAQGM DYLHAKN-----IIHRDMKSN  
 Rn\_RAF1 -----ETKQMFQLIDIAR-QTAQGM DYLHAKN-----IIHRDMKSN  
 Bt\_RAF1 -----ETKQMFQLIDIAR-QTAQGM DYLHAKN-----IIHRDMKSN  
 Gg\_RAF1 -----ETKQMFQLIDIAR-QTAQGM DYLHAKN-----IIHRDMKSN  
 Xl\_RAF1 -----DTKQMFQLIDIAR-QTAQGM DYLHAKN-----IIHRDMKSN  
 Ce\_RAF1 -----PRVEFMGAIIDILK-QVSLGMNVLHAKN-----IIHRDLKTN  
 GNI\_162980 PRQAAPLGQAP--GRLNTGSQQVLEHRRIKSLPPAAQ--APAK--TSV-ASLNLDTCDIMLILK-YTLQGLIYLQRTAGRDDPQAGVVSCHGNKTPS

2610 2620 2630 2640 2650 2660 2670 2680 2690 2700  
 .....|.....|.....|.....|.....|.....|.....|.....|.....|.....|  
 PF3D7\_1106800 NILLDESL-NAKISDFGISKIENCLDMNIDY-----  
 PFIT\_1107600 NILLDESL-NAKISDFGISKIENCLDMNIDY-----  
 PPRFG01\_1107500 NILLDESL-NAKISDFGISKIENCLDMNIDY-----  
 PRCDC\_1105300 NILLDESL-NAKISDFGISKIEKCLDMNIDY-----  
 PRG01\_1104000 NILLDESL-NAKISDFGISKIEECLDMNIDY-----  
 PBILCG01\_1104000 NILLDESL-NAKISDFGISQIEECLDMNIDY-----  
 PBLACG01\_1104300 NVLLDESL-NAKISDFGISQIEECLDMNIDY-----  
 PADL01\_1105000 NILLDDSL-NAKISDFGISQIEECLDMNIDY-----  
 PGABG01\_1103900 NILLDESL-NAKISDFGISQIEECLDMNIDY-----  
 PGSY75\_1106800 NILLDESL-NAKISDFGISQIEECLDMNIDY-----  
 PGAL8A\_00334100 NILLDESL-NAKISDFGIHQIEKCLDNIDY-----  
 PRELSG\_0904000 NILLDESL-NAKIADFGIQIEKCLDNIDY-----  
 PccGH01\_09013500 NVLLDESL-NAKICDFGIGEIEKCLDNVDY-----  
 PYYM\_0941700 NILLDESL-NAKISDFGIKEIEECLDNIDY-----  
 PY02790 -----  
 PY02791 NILLDESL-NAKISDFGIKEIEECLDNIDY-----  
 PBANKA\_0940100 NILLDSSL-NAKISDFGIKEIEQCLDNIDY-----  
 PCHAS\_0904200 NILLDESL-NAKISDFGIKEIEQCLDNIDY-----  
 PCHAS\_090420 YIE\_02751 NILLDESL-NAKISDFGIKEIEQCLDNIDY-----  
 YYG\_01693 NILLDESL-NAKISDFGIKEIEQCLDNIDY-----  
 PmUG01\_09016400 NVLLDEFL-NAKVSDFGISKIEKCLDNIDY-----  
 C922\_04039 NILLDEAL-NAKITDFGICEIEKCLDNVDH-----  
 PcyM\_0908600 NILLDEAL-NAKITDFGICEIEKCLDNIDH-----  
 PKNOH\_s120122800 NILLDEAL-NAKITDFGICEIEKCLDNIDH-----  
 PKNH\_0904400 NILLDEAL-NAKITDFGICEIEKCLDNIDH-----  
 PVP01\_0907600 NILLDEAL-NAKITDFGICEIEKCLDTHVDH-----  
 PVX\_091015 NILLDEAL-NAKITDFGICEIEKCLDTHVDH-----  
 THRCLA\_22740 SIFV--GL-NYRSTKVGW-----  
 THRCLA\_04632 SIFV--GL-NYRSTKVGW-----  
 BESB\_019990 KILVDEAL-NAKLI GSDSETLRQWCVAFAAASLRGPPPCASGGDPVTAAGVSYGGCPPLPLSSSPLPLVARPTALSAPLPWASSPQSLARLPG-PIPA  
 BN1204\_042460 NILVDDAM-NAKLTGLAVKSVHOWCCALMHAC--AAGDA--AALSGSFA-----SVFPPFLDCLRLGPGASTPSVRKSQLSLPC-PSSP  
 TGGT1\_290225 KVLVDESM-NAQLTGLAATTVHEWCRAWLQA--DAGDG--VSGIFA-----SSTVPLFCESLRFERGGAT-----LSLPS-PSSP  
 TGD0M2\_290225 KVLVDESM-NAQLTGLAATTVHEWCRAWLQA--DAGDG--VSGIFA-----SSTVPLFCESLRFERGGAT-----LSLPS-PSSP  
 BN1205\_083850 KVLVDESM-NAQLTGLAATTVHEWCRAWLQA--DAGDG--VSGIFA-----SSTVPLFCESLRFERGGAT-----LSLPS-PSSP  
 HHA\_290225 KVLVDESM-NAQLTGLAVTAVHEWSRAWLQA-----DAGDG--VSGTFT-----SSTGPPLCDSLRFELGDPT-----LSLPS-PSSP  
 ETH\_00000110 KVLLDGAL-APKLAGFGIAEIESLLAQNVRSI-----  
 ENH\_0020460 KVLLDGAL-APKLAGFGIAEIESLLAQNVRSI-----QQALEG-PLMG  
 EMWEY\_00023200 IHFSLESL--ARLC--GIAEIGRRLALNVTECL-----QRCLQGAPRGA  
 Hs\_RAF1 NIFLHEGL-TVKIGDFGLATVKSRWS-----  
 Pa\_RAF1 NIFLHEGL-TVKIGDFGLATVKSRWS-----  
 Mm\_RAF1 NIFLHEGL-TVKIGDFGLATVKSRWS-----  
 Rn\_RAF1 NIFLHEGL-TVKIGDFGLATVKSRWS-----  
 Bt\_RAF1 NIFLHEGL-TVKIGDFGLATVKSRWS-----  
 Gg\_RAF1 NIFLHEGL-TVKIGDFGLATVKSRWS-----  
 Xl\_RAF1 NIFLHEGL-TVKIGDFGLATVKTRWS-----  
 Ce\_RAF1 NIFLMDDMSTVKIGDFGLATVKTKWTVN-----  
 GNI\_162980 NILLTDQH--EAKLGDYCEYMIERAFQPVVLDLD-----

2710 2720 2730 2740 2750 2760 2770 2780 2790 2800  
 .....|.....|.....|.....|.....|.....|.....|.....|.....|.....|  
 PF3D7\_1106800 -----SYKISSN-----SVIKINKKEYEQ-----KRAKKI-----KIV-NK-----NNNDL  
 PFIT\_1107600 -----SYKISSN-----SVIKINKKEYEQ-----KRAKKI-----KIV-NK-----NNNDL  
 PPRFG01\_1107500 -----SYKISSN-----SVIKINKKEYEQ-----KRAKKI-----KIV-NK-----NNNDL  
 PRCDC\_1105300 -----SYKISSN-----SVIKINKKEYEQ-----KRAKKI-----KIV-NK-----NNNDL  
 PRG01\_1104000 -----SYKISSN-----SVIKINKKEYEQ-----KRAKKI-----KIV-NK-----NNNDL  
 PBILCG01\_1104000 -----SYTSSN-----SVIKINKKEYEQ-----KRAKKI-----KIV-KK-----KNNDL  
 PBLACG01\_1104300 -----SYKISSN-----SVIKINKKEYEQ-----MTAKKI-----KIV-KK-----KNNDL  
 PADL01\_1105000 -----SYIVSSN-----SVIKINKKEYEE-----KNAKKM-----KIV-KK-----KNNDL  
 PGABG01\_1103900 -----SYIVSAN-----SVIKINKKEYEQ-----KNAKKM-----KIV-KK-----KNNDL  
 PGSY75\_1106800 -----SYIVSAN-----SVIKINKKEYEQ-----KNAKKM-----KIV-KK-----KNNDL  
 PGAL8A\_00334100 -----SYVLSN-----KLIKFNKHHLN-----KRVKEM-----KIV-NK-----NSNDL

PRELSG\_0904000 ---SYIVLSN---KLIKFNKNHLDK---KRVKEM---KIV-NK---NSNDL  
 PocGH01\_09013500 ---AYVIFSN---NVVFNKKYAE---RNVKMK---KMYSNK---DFNNL  
 PYYM\_0941700 ---SYIVFPN---NVIKFNNHFK---NKIKKI---KIV-NK---GSEDM  
 PY02790 ---SYIVFPN---NVIKFNNHFK---NKIKKI---KIV-NK---GSEDM  
 PY02791 ---SYIVFPN---NVIKFNNHFK---NKIKKI---KIV-NK---GSEDM  
 PBANKA\_0940100 ---SYIVFPN---NVIKFNNHFK---NKIKKI---KIV-NK---GSEDM  
 PCHAS\_0904200 ---SYIVFPN---NVIKFNNHFK---NKIKKI---KIV-NK---DSEDM  
 PCHAS\_090420 ---SYIVFPN---NVIKFNNHFK---NKIKKI---KIV-NK---DSEDM  
 YYE\_02751 ---SYIVFPN---NLIKFNQHFK---NKIKKI---KIV-NK---DSEDM  
 YYG\_01693 ---SYIVFPN---NVIKFNNHFK---NKIKKI---KIV-NK---DSEDM  
 PmUG01\_09016400 ---SYVVFVN---NLIKFNKYSQ---KRVKMK---KIV-NK---NSNDL  
 C922\_04039 ---SYVHPN---GVTTFDAVLAD---RKVQRM---EFSRN---DLSDV  
 PcyM\_0908600 ---SYVHPN---GTSFDVAVLAD---RKVQRM---EFSRN---DFNDV  
 PKNOH\_s120122800 ---SYVVPN---GLTTFDVVLAD---RNVQKM---EFSRN---DLSDV  
 PKNH\_0904400 ---SYVVPN---GLTTFDVVLAD---RNVQKM---EFSRN---DLSDV  
 PVP01\_0907600 ---SYVYAN---GVTTFDAALAD---RKVHRM---EFSRNAFNDVPLSDVPLSDV  
 PVX\_091015 ---SYVYAN---GVTTFDAALAD---RKVHRM---EFSRNAFNDVPLSDVPLSDV  
 THRCLA\_22740 ---N---DVFGERAHGK---P---RCDV  
 THRCLA\_04632 ---N---DVFGERAHGK---P---RCDV  
 BESB\_019990 PLSPALPCPPALSPRSPSLQLCLASEPVRHSSGAPTSP--SRRSRRRATAAAQTRGAGDP--QRESCVA--PLSRLSRLSS--FEERP  
 BN1204\_042460 SV-SP--PCSAALSRSPTLSFACPSERFA--SGVASPVGDKKREGLRHQLGRFVITAPSSG--EGSTORRIAGR--GGKDE  
 TGGT1\_290225 P--SPFL--SARAAASPALSFCLEET--LGLSSPA--VKQQTFRRLQLTFLSALSVDAAHHTTRKAEGRS--TRGEEGRREGR--SSRAA  
 TGD0M2\_290225 P--SPFL--SARAAASPALSFCLEET--LGLSSPA--VKQQTFRRLQLTFLSASSGVDSAHAHTTRKAEGRS--TRGEEGRREGR--SSRAA  
 BN1205\_083850 P--SPFL--SARAAASPALSFCLEET--LGLSSPA--VKQQTFRRLQLTFLSASSGVDSAHAHTTRKAEGRS--TRGEEGRREGR--SSRAA  
 HHA\_290225 P--SPFL--SARAAASPALSFCLEET--LGLSSPA--VKQQTFRRLQLTFLSAPSAGDGAHTTARKEGRS--TRGEEGRREGRS--STRAE  
 ETH\_00000110 PAGA--SQGPTQ--QGL--SAEATPR--RRRGSDEGLNCPAD--NRAEGM--SLQDDQQ--QQQQQ  
 ENH\_0020460 PAGA--SQGPTQ--QGL--SAEAPY--RRRGSDEGLNCPAD--NRAEGI--SLQDDQQ--QQQQQ  
 EMWEY\_00023200 PLGAP--PPWGPLV--GSPWG--SPWGPS--AAQQAAGGPGQSAD--RDNEGQEQEQEQEQEQE--QQQQQ  
 Hs\_RAF1  
 Pa\_RAF1  
 Mm\_RAF1  
 Rn\_RAF1  
 Bt\_RAF1  
 Gg\_RAF1  
 Xl\_RAF1  
 Ce\_RAF1  
 GNI\_162980 ---ESVPCPK---

2810 2820 2830 2840 2850 2860 2870 2880 2890 2900  
 FF3D7\_1106800 LLYLDHNNNVYKYNTQYIDVTYNNSSPSI---FYWTPPEILRG---KKNKKFYSDIYAFGIILWEMLSNDIP---YNYPFASHIMAV  
 PFFIT\_1107600 LLYLDHNNNVYKYNTQYIDVTYNNSSPSI---FYWTPPEILRG---KKNKKFYSDIYAFGIILWEMLSNDIP---YNYPFASHIMAV  
 PRRFG01\_1107500 LLYLDHNNNVYKYNTQYIDVTYNNSSPSI---FYWTPPEILRG---KKNKKFYSDIYAFGIILWEMLSNDIP---YNYPFASHIMAV  
 PRCDC\_1105300 LLYLDHNNNVYKYNTQYIDVTYNNSSPSI---FYWTPPEILRG---KKNKKFYSDIYAFGIILWEMLSNDIP---YNYPFASHIMAA  
 PRG01\_1104000 LLYLDHNNNVYKYNTQYIDVTYNNSSPSI---FYWTPPEILRG---KKNKKFYSDIYAFGIILWEMLSNDIP---YNYPFASHIMAA  
 PBILCG01\_1104000 LLYLDHNNNVYKYNTQYIDVSSNSSPSI---FYWTPPEILRG---KKNKKFYSDIYAFGIILWEMLSNDIP---YNYPFASHIMAA  
 PBLACG01\_1104300 LLYLDHNNNVYKYNTQYIDVSSNSSPSV---FFWTPPEILRG---KKNKKFYSDIYAFGIILWEMLTNDIP---FNYPFASHIMAA  
 PADL01\_1105000 LLYLDHNNNVYKYNTQYIDVSTSSPSI---FYWTPPEILRG---KKNKKFYSDIYAFGIILWQMSNDIP---FNYPFASHIMAA  
 PGABG01\_1103900 LLYLDHNNNVYKYNTQYIDVSTSSPSI---FYWTPPEILRG---KKNKKFYSDIYAFGIILWEMLSNDIP---FNYPFASHIMAA  
 PGSY75\_1106800 LLYLDHNNNVYKYNTQYIDVSPSSPSI---FYWTPPEILRG---KKNKKFYSDIYAFGIILWEMLSNDIP---FNYPFASHIMAA  
 PGAL8A\_00334100 LYIYDDKNNVNEYNTKLIYGSPPSNHYSYV---SYWTPPEVLRG---KASKYLYSDIYAFGIILWEMLSNIP---FNYPFKSHLVAS  
 PRELSG\_0904000 LYIYDDKNNVHKYNTQYIDVSSPSI---SFWTPPEILRG---KKNKKFYSDIYAFGIILWEMLSNIP---FNYPFKSHLVAS  
 PocGH01\_09013500 LYVHTDKNYVHKYHTKEIYTSSTNLYNSI---SFWTAPEILRG---KKNTRLYSDIYAFGIILWEMLSNIP---FNYPFKSHLVAS  
 PYYM\_0941700 LHVFSKNNHIKYNTKQIDVSSNHDSSV---SFWTAPEILKR---KQNPPLYSDIYAFGIILWELMTNSVP---FNYRFKSHLLAS  
 PY02790 ---  
 PY02791 LHVFSKNNHIKYNTKQIDVSSNHDSSV---SFWTAPEILKR---KQNPPLYSDIYAFGIILWELMTNSVP---FNYRFKSHLLAS  
 PBANKA\_0940100 LHVFSKNNHIKYNTREINVSNTNHSV---FFWTSPEILKG---KQSPPLYSDIYAFGIILWELMTNSVP---FNYRFKSHLLAS  
 PCHAS\_0904200 LHVFSKNNHIKYNTREIDVSSNSH-NSV---FFWTAPEILKG---KKNKRYSDIYAFGIILWELMTNSIP---FNYRFKSHLVSS  
 PCHAS\_090420 LHVFSKNNHIKYNTREIDVSSNSH-NSV---FFWTAPEILKG---KQNPPLYSDIYAFGIILWELMTNSIP---FNYRFKSHLVSS  
 YYE\_02751 LHVFSKNNHIKYNTREIDVSSNSH-DSV---FFWTAPEILKG---KKNTRLYSDIYAFGIILWELMTNSIP---FNYRFKSHLVAS  
 YYG\_01693 LHVFSKNNHIKYNTREIDVSSNSH-DSV---FFWTAPEILKG---KKNKRYSDIYAFGIILWELMTNSIP---FNYRFKSHLVAS  
 PmUG01\_09016400 LYIYDDKNNNAHKYNTKQIYSSSAGCCAPI---SFWTPPEVLRG---KKNKLYADYAFGIILWEMLSNIP---FNYPFKSHLVAA  
 C922\_04039 LRVYDDEDQLHLYSIEIRIVASPPSAYPSV---SFWTPPEILRG---QRGRPFYADYAFGIILWELMTNSVP---FNYPFKSHLVAS  
 PcyM\_0908600 LRVYDDEDKMHLYSIEIRIVASPPSAYPSV---SFWTPPEILRG---QRKPFYADYAFGIILWELMTNSVP---FNYPFKSHLVAS  
 PKNOH\_s120122800 LRVHDYEDKLHLYSVQIRIVASPPSAYPSV---SFWTPPEILRG---QRKPFYADYAFGIILWELMTNSVP---FNYPFKSHLVAS  
 PKNH\_0904400 LRVHDYEDKLHLYSVQIRIVASPPSAYPSV---SFWTPPEILRG---QRKPFYADYAFGIILWELMTNSVP---FNYPFKSHLVAS  
 PVP01\_0907600 LRVYDDEDKMHLYSIEIRIVASPPSAYPSV---SFWTPPEILRG---QRKPFYADYAFGIILWELMTNSVP---FNYPFKSHLVAS  
 PVX\_091015 LRVYDDEDKMHLYSIEIRIVASPPSAYPSV---SFWTPPEILRG---QRKPFYADYAFGIILWELMTNSVP---FNYPFKSHLVAS  
 THRCLA\_22740 ---YLAPEILSG---NSNYDTRSDIYAFGIILWEMITKESPEQIYSEYQEKMRNYSFTNNEFV-  
 THRCLA\_04632 ---YLAPEILSG---NSNYDTRSDIYAFGIILWEMITKESPEQIYSEYQEKMRNYSFTNNEFV-  
 BESB\_019990 LRSSEVALDVAEETLELRDGGGKEEFVAVLQR---LNWASPEELLYG---FPPHARGACDIHAFGVILWQMSGLVP---FQFMSPAQIIGA  
 BN1204\_042460 RREPRSQNRNSQSSKEKTDFTADEEDTAWLKR---VNWASPEELLYG---IPPQTSASDIHAFGVILWQMSGLVP---HQFMSPAQIIGA  
 TGGT1\_290225 RRESKSKQKRSQRAREARGTGEDSSDLWLKH---ANWASPEELLYG---IHPQTRGASDIHAFGVILWQMSGLVP---HQFMSPAQIIGA  
 TGD0M2\_290225 RRESKSKQKRSQRAREARGTGEDSSDLWLKH---ANWASPEELLYG---IHPQTRGASDIHAFGVILWQMSGLVP---HQFMSPAQIIGA  
 BN1205\_083850 RRESKSKQKRSQRAREARGTGEDSSDLWLKH---ANWASPEELLYG---IHPQTRGASDIHAFGVILWQMSGLVP---HQFMSPAQIIGA  
 HHA\_290225 RRESKSKQKRSQRAREARGTGEDSSDLWLKH---ANWASPEELLYG---IHPQTRGASDIHAFGVILWQMSGLVP---HQFMSPAQIIGA  
 ETH\_00000110 LQ--RQROEDLQQQISAVRAISAAALRQFSWYERMLQLPWSPPAVCLGL-SEPEKKYIDVYSGVVFQWQILTLGLQP---FAELSSAQIVGC  
 ENH\_0020460 LQ--RQROEDLQQQISAAARAIISALRQFSWYERMLQLPWSPPAVCLGL-SEPEKKYIDVYSGVVFQWQILTLGLQP---FAELSSAQIVGC  
 EMWEY\_00023200 LQQYEQQQYEQQQGAAARALLDALRQSDNRCERMLQLPWNPPSVSLGL-SHPEEKYIDVYSGVAVFQWQILTLGRPP---FAELSSAQIVGC  
 Hs\_RAF1 ---GSQQVE---QPTGS---VLWMAPEVIRMQ---DNPPFSFQSDVYSYGIVLYELMTGELP---Y---SHINNRDQIIFM  
 Pa\_RAF1 ---GSQQVE---QPTGS---VLWMAPEVIRMQ---DNPPFSFQSDVYSYGIVLYELMTGELP---Y---SHINNRDQIIFM  
 Mm\_RAF1 ---GSQQVE---QPTGS---VLWMAPEVIRMQ---DNPPFSFQSDVYSYGIVLYELMTGELP---Y---AHINNRDQIIFM



|                  |                    |
|------------------|--------------------|
| YYG_01693        | -----              |
| PmUG01_09016400  | -----              |
| C922_04039       | -----              |
| PcyM_0908600     | -----              |
| PKNOH_S120122800 | -----              |
| PKNH_0904400     | -----              |
| PVP01_0907600    | -----              |
| PVX_091015       | -----              |
| THRCLA_22740     | -----              |
| THRCLA_04632     | -----              |
| BESB_019990      | -----              |
| BN1204_042460    | -----              |
| TGGT1_290225     | -----              |
| TGDOM2_290225    | -----              |
| BN1205_083850    | -----              |
| HHA_290225       | -----              |
| ETH_00000110     | -----              |
| ENH_0020460      | -----              |
| EMWEY_00023200   | -----              |
| Hs_RAF1          | -----VF--          |
| Pa_RAF1          | -----VF--          |
| Mm_RAF1          | -----VF--          |
| Rn_RAF1          | -----VF--          |
| Bt_RAF1          | -----VF--          |
| Gg_RAF1          | -----VF--          |
| Xl_RAF1          | -----VF--          |
| Ce_RAF1          | AAAAAANKKAYYNVYGLI |
| GNI_162980       | -----              |

## Supporting Information 6 – MAFFT Alignment SAM and SAM-like domains

|                     | 10       | 20       | 30      | 40  | 50       | 60     | 70  | 80  | 90  | 100 |     |
|---------------------|----------|----------|---------|-----|----------|--------|-----|-----|-----|-----|-----|
| PWI_SRM160_Hs       | QLKFAECL | EKKVDM   | SKVNLEV | --- | TKPWIT   | KRVTEI | --- | --- | --- | --- | --- |
| PWI_FF3D7_0311100   | ---      | ---      | ---     | --- | ---      | ---    | --- | --- | --- | --- | --- |
| PWI_RBM25_Hs        | ---      | ---      | ---     | --- | ---      | ---    | --- | --- | --- | --- | --- |
| PWI_FF3D7_0610200   | PELFAYPL | DWSI-VDS | ILMER   | --- | RIRPWINK | KKIIEY | --- | --- | --- | --- | --- |
| SAM2_SARM1_Hs       | ---      | ---      | ---     | --- | ---      | ---    | --- | --- | --- | --- | --- |
| SAM2_Sarm1_Mm       | ---      | ---      | ---     | --- | ---      | ---    | --- | --- | --- | --- | --- |
| BAF_Hs              | ---      | ---      | ---     | --- | ---      | ---    | --- | --- | --- | --- | --- |
| BAF_Dm              | ---      | ---      | ---     | --- | ---      | ---    | --- | --- | --- | --- | --- |
| BAF_Ce              | ---      | ---      | ---     | --- | ---      | ---    | --- | --- | --- | --- | --- |
| PWI_USP107_Sp       | ---      | ---      | ---     | --- | ---      | ---    | --- | --- | --- | --- | --- |
| Pnt_ETS1_Hs         | ---      | ---      | ---     | --- | ---      | ---    | --- | --- | --- | --- | --- |
| Pnt_ETS1_Mm         | ---      | ---      | ---     | --- | ---      | ---    | --- | --- | --- | --- | --- |
| Pnt_ETS2_Hs         | ---      | ---      | ---     | --- | ---      | ---    | --- | --- | --- | --- | --- |
| Pnt_ETS2_Mm         | ---      | ---      | ---     | --- | ---      | ---    | --- | --- | --- | --- | --- |
| Pnt_PNT2_Dm         | ---      | ---      | ---     | --- | ---      | ---    | --- | --- | --- | --- | --- |
| Pnt_GABPalph_Mm     | ---      | ---      | ---     | --- | ---      | ---    | --- | --- | --- | --- | --- |
| Pnt_ERG_Hs          | ---      | ---      | ---     | --- | ---      | ---    | --- | --- | --- | --- | --- |
| Pnt_Etv6_Hs         | ---      | ---      | ---     | --- | ---      | ---    | --- | --- | --- | --- | --- |
| Pnt_Etv6_Mm         | ---      | ---      | ---     | --- | ---      | ---    | --- | --- | --- | --- | --- |
| Pnt_Yan_Dm          | ---      | ---      | ---     | --- | ---      | ---    | --- | --- | --- | --- | --- |
| Pnt_Mae_Dm          | ---      | ---      | ---     | --- | ---      | ---    | --- | --- | --- | --- | --- |
| SAM_smg_Dm          | ---      | ---      | ---     | --- | ---      | ---    | --- | --- | --- | --- | --- |
| SAM_smg_Xl          | ---      | ---      | ---     | --- | ---      | ---    | --- | --- | --- | --- | --- |
| SAM_smg_Rn          | ---      | ---      | ---     | --- | ---      | ---    | --- | --- | --- | --- | --- |
| SAM_smg1_Mm         | ---      | ---      | ---     | --- | ---      | ---    | --- | --- | --- | --- | --- |
| SAM_smg1_Hs         | ---      | ---      | ---     | --- | ---      | ---    | --- | --- | --- | --- | --- |
| SAM_smg2_Hs         | ---      | ---      | ---     | --- | ---      | ---    | --- | --- | --- | --- | --- |
| SAM_smg2_Mm         | ---      | ---      | ---     | --- | ---      | ---    | --- | --- | --- | --- | --- |
| SAM_VTS1_Sc         | ---      | ---      | ---     | --- | ---      | ---    | --- | --- | --- | --- | --- |
| SAM_EphA4_Hs        | ---      | ---      | ---     | --- | ---      | ---    | --- | --- | --- | --- | --- |
| SAM_EphA7_Hs        | ---      | ---      | ---     | --- | ---      | ---    | --- | --- | --- | --- | --- |
| SAM_EphA6_Hs        | ---      | ---      | ---     | --- | ---      | ---    | --- | --- | --- | --- | --- |
| SAM_EphB1_Hs        | ---      | ---      | ---     | --- | ---      | ---    | --- | --- | --- | --- | --- |
| SAM_EphB2_Hs        | ---      | ---      | ---     | --- | ---      | ---    | --- | --- | --- | --- | --- |
| SAM_EphB3_Hs        | ---      | ---      | ---     | --- | ---      | ---    | --- | --- | --- | --- | --- |
| SAM_EphB5_Gg        | ---      | ---      | ---     | --- | ---      | ---    | --- | --- | --- | --- | --- |
| SAM_EphA2_Hs        | ---      | ---      | ---     | --- | ---      | ---    | --- | --- | --- | --- | --- |
| SAM_EphA3Hs         | ---      | ---      | ---     | --- | ---      | ---    | --- | --- | --- | --- | --- |
| SAM1_Caskin1_Hs     | ---      | ---      | ---     | --- | ---      | ---    | --- | --- | --- | --- | --- |
| SAM_SHIP2_Hs        | ---      | ---      | ---     | --- | ---      | ---    | --- | --- | --- | --- | --- |
| SAM_INPPL1_Hs       | ---      | ---      | ---     | --- | ---      | ---    | --- | --- | --- | --- | --- |
| SAM2_Caskin1_Hs     | ---      | ---      | ---     | --- | ---      | ---    | --- | --- | --- | --- | --- |
| SAM1_ANKS1A_Hs      | ---      | ---      | ---     | --- | ---      | ---    | --- | --- | --- | --- | --- |
| SAM2_ANKS1A_Hs      | ---      | ---      | ---     | --- | ---      | ---    | --- | --- | --- | --- | --- |
| SAM_Sqp53_Lf        | ---      | ---      | ---     | --- | ---      | ---    | --- | --- | --- | --- | --- |
| SAM_p63_Es          | ---      | ---      | ---     | --- | ---      | ---    | --- | --- | --- | --- | --- |
| SAM_p63alpha_Hs     | ---      | ---      | ---     | --- | ---      | ---    | --- | --- | --- | --- | --- |
| SAM_p73alpha_Hs     | ---      | ---      | ---     | --- | ---      | ---    | --- | --- | --- | --- | --- |
| SAM_p73_Mm          | ---      | ---      | ---     | --- | ---      | ---    | --- | --- | --- | --- | --- |
| SAM_ARAP1_Hs        | ---      | ---      | ---     | --- | ---      | ---    | --- | --- | --- | --- | --- |
| SAM_Neurabin1_Hs    | ---      | ---      | ---     | --- | ---      | ---    | --- | --- | --- | --- | --- |
| SAM_Neurabin_Pa     | ---      | ---      | ---     | --- | ---      | ---    | --- | --- | --- | --- | --- |
| SAM_Byr2_Sp         | ---      | ---      | ---     | --- | ---      | ---    | --- | --- | --- | --- | --- |
| SAM_BOI2_Sc         | ---      | ---      | ---     | --- | ---      | ---    | --- | --- | --- | --- | --- |
| SAM_BOI1_Sc         | ---      | ---      | ---     | --- | ---      | ---    | --- | --- | --- | --- | --- |
| SAM_pob1_Sp         | ---      | ---      | ---     | --- | ---      | ---    | --- | --- | --- | --- | --- |
| SAM_SDRG_01147_Sd   | ---      | ---      | ---     | --- | ---      | ---    | --- | --- | --- | --- | --- |
| SAM_DPYK1_Dd        | ---      | ---      | ---     | --- | ---      | ---    | --- | --- | --- | --- | --- |
| SAM_SPLA_Dd         | ---      | ---      | ---     | --- | ---      | ---    | --- | --- | --- | --- | --- |
| SAM1_SARM1_Hs       | ---      | ---      | ---     | --- | ---      | ---    | --- | --- | --- | --- | --- |
| SAM1_Sarm1_Mm       | ---      | ---      | ---     | --- | ---      | ---    | --- | --- | --- | --- | --- |
| SAM1_tir1_Ce        | ---      | ---      | ---     | --- | ---      | ---    | --- | --- | --- | --- | --- |
| SAM_C33B4.3_Ce      | ---      | ---      | ---     | --- | ---      | ---    | --- | --- | --- | --- | --- |
| SAM_DGKD_Hs         | ---      | ---      | ---     | --- | ---      | ---    | --- | --- | --- | --- | --- |
| SAM_SHANK1_Rn       | ---      | ---      | ---     | --- | ---      | ---    | --- | --- | --- | --- | --- |
| SAM_SHANK3_Hs       | ---      | ---      | ---     | --- | ---      | ---    | --- | --- | --- | --- | --- |
| SAM_ZAK_Hs          | ---      | ---      | ---     | --- | ---      | ---    | --- | --- | --- | --- | --- |
| SAM_Ste4_Sp         | ---      | ---      | ---     | --- | ---      | ---    | --- | --- | --- | --- | --- |
| SAM_Samhd1_Mm       | ---      | ---      | ---     | --- | ---      | ---    | --- | --- | --- | --- | --- |
| SAM_SAMHD1_Hs       | ---      | ---      | ---     | --- | ---      | ---    | --- | --- | --- | --- | --- |
| SAM_SPK11_Dd        | ---      | ---      | ---     | --- | ---      | ---    | --- | --- | --- | --- | --- |
| SAM_DDB_G0278535_Dd | ---      | ---      | ---     | --- | ---      | ---    | --- | --- | --- | --- | --- |
| SAM_DDB_G0272092_Dd | ---      | ---      | ---     | --- | ---      | ---    | --- | --- | --- | --- | --- |
| SAM_TNKS_Hs         | ---      | ---      | ---     | --- | ---      | ---    | --- | --- | --- | --- | --- |
| SAM_LRSAM1_Hs       | ---      | ---      | ---     | --- | ---      | ---    | --- | --- | --- | --- | --- |
| SAM_SAMD3_Hs        | ---      | ---      | ---     | --- | ---      | ---    | --- | --- | --- | --- | --- |
| SAM_FF3D7_1106800   | ---      | ---      | ---     | --- | ---      | ---    | --- | --- | --- | --- | --- |
| SAM_Kif6_Dd         | ---      | ---      | ---     | --- | ---      | ---    | --- | --- | --- | --- | --- |



SAM\_Epha4\_Hs Y----TTLEAV--VHVNOEDLAR--I-GITAIHQNKIL--SSVQ--AMRTQ  
 SAM\_Epha7\_Hs Y----NSLESV--ARMTIEDVMS--L-GITLVGHQKKIM--SSIQ--TMRAQ  
 SAM\_Epha6\_Hs F----TTFDLI--SRMSIDDIRR--I-GVILIGHQRRIV--SSIQ--TLRLH  
 SAM\_EphB1\_Hs F----TSLQLV--TQMTSEDLRLR--I-GITLAGHQKKIL--NSIH--SMRVQ  
 SAM\_EphB2\_Hs F----TSFDVV--SQMMEDILR--V-GVTLAGHQKKIL--NSIQ--VMRAQ  
 SAM\_EphB3\_Hs F----ASFDLV--AQMTAEDLLR--I-GVTLAGHQKKIL--SSIQ--DMRLQ  
 SAM\_EphB5\_Gg L----ITFDVI--SRMTLEDLQR--I-GITLVGHQKKIL--NSIQ--LMKVH  
 SAM\_Epha2\_Hs Y----TATEKV--VQMTNDDIKR--I-GVRLPGHQKRIA--YSLI--GLKQD  
 SAM\_Epha3Hs Y----SSCDTI--AKISTDDMKK--V-GVTVVGPOKKII--SSIK--ALETQ  
 SAM1\_Caskin1\_Hs Y----DLPTI--SRMTPEDLTA--I-GVTKPGHRRKIA--AEIS--GLSIP  
 SAM\_SHIP2\_Hs W----DDLEFL--SDITEEDLEE--A-GVQDPAH-KRLL--LDTL--QLSK  
 SAM\_INPPL1\_Hs W----DDLEFL--SDITEEDLEE--A-GVQDPAH-KRLL--LDTL--QLSK  
 SAM2\_Caskin1\_Hs Y----ENIDFI--TDITWEDLQE--I-GITKLGHQKKLM--LAVR--KLABEL  
 SAM1\_ANKS1A\_Hs F----DDVHFLG--SNVMEEQDLRD--I-GISDPQHRRLKLL--QAAR--SLPKV  
 SAM2\_ANKS1A\_Hs Y----SSIDTV--KNLWELELVNV--L-KVQLLGHRRKRII--ASLAD--RPEEP  
 SAM\_Sqp53\_Lf L----HNMFOVL--DEFTLEDLQS--M-RIG--  
 SAM\_p63\_Es L----HNMFOVL--DEFTLEDLQS--M-RIG--  
 SAM\_p63alpha\_Hs L----TTIYQI--EHYSMDLGLS--L-KIPEQ-FRHAIW--KGIL--DHRQL  
 SAM\_p73alpha\_Hs L----QSIYHL--QNLTIEDLGA--L-KIPEQ-YRMTIW--RGLQ--DLKQC  
 SAM\_p73\_Mm L----QSIYHL--QNLTIEDLGA--L-KVPDQ-YRMTIW--RGLQ--DLKQS  
 SAM\_ARAP1\_Hs L----VWATEC--QQLSDTRIMD--M-GMLLPQHRRRIL--AGLL--RAHTS  
 SAM\_Neurabin1\_Hs I----TGEQL--LQLDGNKLLA--L-GMTASQDRAVVK--KKLK--EMKMS  
 SAM\_Neurabin\_Pa I----TGEQL--LQLDGNKLLA--L-GMTASQDRAVVK--KKLK--EMKMS  
 SAM\_Byr2\_Sp I----EGRHL--NHLTLPLLLK--L-GIENTAKGQQLF--KQRD--YLREF  
 SAM\_BOI2\_Sc I----SGKIL--LELELHLKE--L-DINSFGTRFEIF--KEIE--KIKEA  
 SAM\_BOI1\_Sc V----SGKIL--LELELHLKE--L-EINSFGIRFQIF--KEIR--NIKSA  
 SAM\_pob1\_Sp I----TGEIL--LGLDSNVLKE--L-NITSFGRFQEV--RQIQ--QLKDS  
 SAM\_SDRG\_01147\_Sd I----TGDVL--PTITNDVLRD--L-KVSAYGHRIKLV--NAIQ--KLIEA  
 SAM\_DPYK1\_Dd I----SGRHL--EGITHAMLKND--L-GIEPYGHREDII--NRLN--RMIQI  
 SAM\_SPLA\_Dd I----SGRHL--EGITHAMLKND--L-GIEPYGHREDII--NRLN--RMIQI  
 SAM1\_SARM1\_Hs V----DGDLL--LRLTEELQTD--L-GMKSGITRKRFF--RELT--ELKTF  
 SAM1\_Sarm1\_Mm V----DGDLL--LRLTDEELQTD--L-GMKSSITRKRFF--RELT--ELKTF  
 SAM1\_tir1\_Ce V----DGDLL--LQLTENDLKH--V-GMISGLHRKRFL--RELQ--TLKVA  
 SAM\_C33B4\_3\_Ce I----NGRCL--RQCDRSRFTQ--L-GVTRIAHRQIIE--SALR--GLLQ  
 SAM\_DGKD\_Hs I----RGSEL--LHLERRDLK--L-GVTKVGHMKRIL--CGIK--ELSR  
 SAM\_SHANK1\_Rn I----DGSHL--PALTKEDYVD--L-GVTRVGHRRMID--RALK--FFLER  
 SAM\_SHANK3\_Hs I----EGAH--PALTKDDFVE--L-GVTRVGHRRMIE--RALR--QLDGS  
 SAM\_ZAK\_Hs I----TKKRL--LLEEEEDLKD--M-GIVSKGHIHFK--SAIE--KLTHD  
 SAM\_Ste4\_Sp I----LGKDI--DLLSSNDLRD--M-GIESVGHRIIDIL--SAIQ--SMKKQ  
 SAM\_Samhd1\_Mm I----AGSFL--PFLDEDRLED--L-GVSSLEERKMI--ECIQ--QLSQS  
 SAM\_SAMHD1\_Hs I----TGALL--PCLDESFRFEN--L-GVSSLGERKKLL--SYIQ--RLVQI  
 SAM\_SPKAI\_Dd M----FLDEL--GEMSEDILNK--M-GITSTGTRRLRIL--KETS--NLANE  
 SAM\_DDB\_G0278535\_Dd I----FMDLL--LDIDERTLDS--L-GITYSGHRLKII--RNCR--ILRDQ  
 SAM\_DDB\_G0272092\_Dd I----YMDVI--TDINEGTLDL--L-NISVSGQRTKLL--RAVR--KIKDP  
 SAM\_TNK5\_Hs I----TLDVL--ADMGHEELKE--I-GINAYGHRHKLII--KQVE--RLLGG  
 SAM\_LRSAM1\_Hs L----SLDLL--SQMSPGDIAK--V-GVSEAGLQHEIL--RRVQ--ELLDA  
 SAM\_SAMD3\_Hs V----SGAAL--LALNDRMVQQ--L-VKKIGHQAVLM--DLIK--KYQNTQGLK  
 SAM\_FF3D7\_1106800 I----TGDKL--KYININTIRNE--L-GIAYGHAIKIL--QLIK--NLQVMAYN  
 SAM\_Kif6\_Dd V----SCDSF--LSFTMDYGN--V-GITSLQDRKKLF--HLLQ--QLKKQ  
 SAM\_KIF24\_Hs L----QKIDEL--AKITMKDYSK--L-GVHDMNDRKRLF--QLIK--IIKIM  
 SAM\_CNKSR1\_Hs L----PGKNL--LQLCPQSLA--L-AVRSLGHQELIL--GGVE--QLQAL  
 SAM\_Ste11\_Sc L----VTEEEI--KYLDKDLILIA--L-GVNKIGDRILKIL--RKSQ--SFORD  
 SAM\_PHC1\_Mm I----DQQA--LLLKEEHLMSA--M-NI-KLGPALKIC--AKIN--VLKET  
 SAM\_RAE28\_Mm I----DQQA--LLLKEEHLMSA--M-NI-KLGPALKIC--AKIN--VLKET  
 SAM\_PHC2\_Hs I----DQQA--LLLKEEHLMSA--M-NI-KLGPALKIY--ARIS--MLKDS  
 SAM\_php\_Dm I----DQQA--LLLKEEHLVNA--M-GM-KLGPALKIV--AKVE--SIKEV  
 SAM\_L3MBTL3\_Hs I----DGEAF--LLMTQTDIVKI--M-SI-KLGPALKIF--NSIL--MFKAA  
 SAM\_Scmh1\_Mm I----DGKAL--LLLRSDMMKY--M-GL-KLGPALKLS--FHID--RLKQV  
 SAM\_Scm\_Dm I----DGKAL--LLLNSEMMKY--M-GL-KLGPALKIC--NLVN--KVNRRNLA  
 SAM\_SFMBT1\_Hs I----DQQA--LLTLPTVQEC--M-DL-KLGPALKIC--HHIE--RIKFAYEQF  
 SAM\_Sfmbt\_Dm I----DGKRL--LQLTKDDIMPL--L-GM-KVGPALKIS--DLIA--QLCK  
 SAM\_SEC23IP\_Hs I----DMESL--LMCTVDDLKE--M-GI-PLGPRKKIA--NFVE--HKAAL  
 SAM\_Ushlg\_Mm I----DLEAL--MLCSDLDLRS--I-SVP-LGPRKKIL--GAVR--RRR  
 SAM1\_LiprinA\_Ce R----SGRHF--LNMSMNEYEGV--L-NIKNPVHRKRVA--ILLR--RIEED  
 SAM2\_Liprin\_Hs V----DARML--DHLTKKDLRVH--L-KMVDSEFHRTSLQ--YGIM--CLKRL  
 SAM2\_Kazrin\_Hs L----DGRML--NSLMKRDLKHX--L-NVSKKPHQVSIL--LGIE--LLYQV  
 SAM\_STIM1\_Hs L----SGHAMP--RLAVTNTTMTGT--VL-KMTDRSHRQKLO--LKAL--DTVLF  
 SAM\_ave\_Dm I----TGRAL--LRITDSSLQR--M-GVTDNRDREAIW--REIV--KQRLK  
 SAM1\_Liprin\_Hs K----SGAIM--SALSDEIQRE--I-GISNALHRLKLR--LAIQ--EMVSL  
 SAM1\_Kazrin\_Hs K----SGKVL--LSLSDDELQLG--L-GVCSLHRRKLR--LAIE--DYRDA  
 SAM2\_tir1\_Ce V----NRSL--SSLTDEMMA--C-GITNPIHRLKLT--QAFE--TAKHP  
 SAM\_D52\_Dm I----DLVEL--ASLERADLVK--I-GLNTEDEDCNRIM--DVLH--TL  
 SAM\_SAMKD\_Dd I----IGKDL--EFLTDKILK--M-GV-GIRDILNFK--FEYQ--ILKNCY  
 SAM\_SAMKC\_Dd I----TGNYL--ESLTDKMLK--M-GL-TIRDLLSFR--SEFD--DLKNIF  
 SAM\_SAMKA\_Dd I----TGRDL--EFLSDKILFK--M-GV-GIRDLLSFK--SEFE--ILKNY  
 SAM\_SAMKB\_Dd I----KGDHL--EFIGDKILIQ--M-GL-SIYERLSFK--SIFK--KLKNNN  
 SAM\_LCP2\_Hs I----DGARF--LNLTENDIQK--F-PKLRVPIILSKLS--QEIN--KNEERSI  
 SAM\_LCP2\_Mm I----DGARF--LNLTENDIQK--F-PKLRVPIILSKLS--QDIN--KNEER  
 SAM\_GARE1\_Hs I----DGNLL--VOLTEEILSED--F-KLSKL-QVKKIM--QFIN--GWRPKI  
 SAM\_FF3D7\_0211700 L----DGYCL--KYIDKILKE--M-KIKNRMMKYI  
 SAM3\_Liprin\_Hs V----HGALLA--LDENFDHNTLALI--L-QIPTQNTQARQVME--REFN--NLLAL  
 SAM3\_Kazrin\_Hs V----HGAVLV--LEPTFNAEAMATA--L-GIPSGKHILR--RHLA--EEMSAVF



```

SAM_PF3D7_0926000 I-----KGIHFF--FILNSKVLKE---L-GINNKEHIFFLM---NIIN--TFNSI-----
SAM_Dlc_Rn F-----PIDIA--LVKREHDFLDRD---AIEALCRRLNTL---NKCA--VMKLE-----
SAM_STA13_Hs F-----PINIV--AVKNDHDFLEKD---LVEPLCRRLNTL---NKCA--SMKLD-----
SAM_STE50_Sc I-----VGDLL--PELCLQDCQDL---CDGDLNKAIKFKILI---NKM RD-SKLEWKD-----
rpoA_Cter_Bs I-----NTVQEL---ANKTEEDMMKV--RNL-GRKSLEE VKAKL---EELG--LGLRKKD---
rpoA_Cter_Ec I-----HYIGDL---VQRTEVELLKT--PNL-GKKSLETEIKDVLAS--RGLS--LGMRL ENWPPASIADE-----
rpoA_Cter_Tt I-----ESVRAL---LALNLKDLKNI--PGI-GERSLEETKEAL---EKKG--FTLKE-----
FEN_Cter_Mja V-----TDNYSL--SLKLPDKEGIIKF---L-VDENDFNYDRVK---KHVD-----
FEN_Cter_Pyf V-----TDNYSL--VWRDPDEEGILKF---L-CDEHDFSEERVK---NGLE--RLKKAIKSGKQSTLESWFK---
FEN_Cter_Pyh V-----TNEYSL--SWKEPDEEGILKF---L-CDEHNFSEERVK---NGIE--RLKKAIKAGRQS-----
FEN_Cter_Arf V-----TDDYRI--EFREPDPEKAEI EF---L-CEHDFSRERVE---KALE--KLK-----
FEN_Cter_Hs VL-----DPESVEL--KWSEPNEEELIKF---M-CGEKQFSEERIR---SGVK---RLSKSRQGSTQGRLDDEFFKVTGSLSSAKRKE-----
SAM1_PF3D7_1302100 K-----DRVSI--RRYVRKNQNRYN---Y-FLI EERVQDNIV---NRIS--DR LISYCTDKE-----
SAM2_PF3D7_1302100 I-----MNDKKL--IRMLFDTYEYVKD---V-KFDDQYKDAAA---RISQ--FLIDV-----
PWI_PRPF3_Hs V-----VTAALNCVCGKGM DKKKAADH---L-KPFLDDSTLRFVD---KLF E--AVEEGRSRHSKSSS-----DRSR-----
PWI_SWM_Dm I-A-----L-LKKDKSDKDLKRI MIEQL-DVFLSEETTRFVE---RLFD---AIASE-----
SAM_PF3D7_1349300 I-----RGYHI--LKLTDKELKLLK---NI-----N-----

```

### Supporting Information 7 - EMBOSS Needle alignment *Pfp*TKL vs *Pbp*TKL

|               |     |                                                                              |     |
|---------------|-----|------------------------------------------------------------------------------|-----|
| PF3D7_1106800 | 1   | MGNTLDSNPKPNFV TYADYKYIGKLNKNEHHGIGII L YNSGESFYGSFI                         | 50  |
|               |     | :  :  :  :  :  :  :  :  :  :  :  :  :  :  :  :  :  :  :  :  :  :  :  :  :  : |     |
| PBANKA_094010 | 1   | MGN-INSIQTKNYIKFEKYYYYAGDLNVDNLPHGRGLMLYENGNSFFGHFI                          | 49  |
| PF3D7_1106800 | 51  | NGKKEGKGIYIDKNLTRYINTWVDNKVFGKVKVVPYNSNRVYFYFYKNYM                           | 100 |
|               |     | :  :  :  :  :  :  :  :  :  :  :  :  :  :  :  :  :  :  :  :  :  :  :  :       |     |
| PBANKA_094010 | 50  | NGKKHGKGIYIDKNLTKYISKWKYDHISNKVKVKQFSDIVYLFFYKNGL                            | 99  |
| PF3D7_1106800 | 101 | IEKCIYFDNNINN KESHKNNIYN NYDNNSYN NNSCDDEEK RKYPIGVTK                        | 150 |
|               |     | :  :  :  :  :  :  :  :  :  :  :  :  :  :  :  :  :  :  :  :  :  :  :          |     |
| PBANKA_094010 | 100 | IDHCKVYE-YISNKKKKKKKK-----NDGILEDSEIQNRSINFEK                                | 138 |
| PF3D7_1106800 | 151 | FKEDLSNYIHSTHIMKKNKLFNKNDNEYNIFSSSLSYSSDSENINLLDI                            | 200 |
|               |     | :  :  :  :  :  :  :  :  :  :  :  :  :  :  :  :  :  :  :  :  :  :  :          |     |
| PBANKA_094010 | 139 | DNIMI IQNCQEKSI VNKKEEIIDIPNNKYN-----ENDDTDKVDN                              | 178 |
| PF3D7_1106800 | 201 | LKKKKKKNKKNKKNKKNKTKNTQILSCTQH KMYEHNMNESNFTKKDNVN                           | 250 |
|               |     | :  :  :  :  :  :  :  :  :  :  :  :  :  :  :  :  :  :  :  :  :  :  :          |     |
| PBANKA_094010 | 179 | FSKKINLEQSQNNMLKYKKK-----TFDEM--NSLNDSIFCS----S                              | 215 |
| PF3D7_1106800 | 251 | CEHTDKM----NISLHEKNDKK-NEKKNEKKNK KKLFKY-----F                               | 286 |
|               |     | :  :  :  :  :  :  :  :  :  :  :  :  :  :  :  :  :  :  :  :  :  :             |     |
| PBANKA_094010 | 216 | CESTSKSIGSDYISHFEKKEKQINKQEDELKSKENYMNHSEYSNSSTNF                            | 265 |
| PF3D7_1106800 | 287 | SNN-----IENLI-----IENYQTWSLREVIQWLMLCNPV                                     | 316 |
|               |     | :  :  :  :  :  :  :  :  :  :  :  :  :  :  :  :  :  :  :  :  :  :  :          |     |
| PBANKA_094010 | 266 | ENNKIKDISDESIMLRLKNIINNNTDLKIENYELWNKEQVAQWLSLCNPV                           | 315 |
| PF3D7_1106800 | 317 | VKWLISFYKNNITGDKLKYININTIRNELGIIAYGHAIKILQLIKNLQVM                           | 366 |
|               |     | :  :  :  :  :  :  :  :  :  :  :  :  :  :  :  :  :  :  :  :  :  :  :          |     |
| PBANKA_094010 | 316 | MKWALSVYKNNINGQRLNNLNLYFIRNKLGILSYGQAIKFLQLIKNLRVT                           | 365 |
| PF3D7_1106800 | 367 | AYNKKFNNLIQIEEYKNYIRQKENTNKNIKKGKNIKKEK KKKKEKNIKKE                          | 416 |
|               |     | :  :  :  :  :  :  :  :  :  :  :  :  :  :  :  :  :  :  :  :  :  :             |     |
| PBANKA_094010 | 366 | AYNTRFSNTLNLEEY EIY LK-----KKMKKKMRENKDGE                                    | 400 |
| PF3D7_1106800 | 417 | -----K KKKK KETKKFNNMDK KYIDLAIHKNVKNI QNDTFY NKHEN                          | 457 |

|               |     |                                                           |      |
|---------------|-----|-----------------------------------------------------------|------|
| PBANKA_094010 | 401 | YTATTSSQAEDFQKNNQKIIMNQIKSMID-----QKNDDDKSFSDKIKN         | 444  |
| PF3D7_1106800 | 458 | IY-----NCKNQTNFIYQNDSEIKKIMNKKKVSFEY---DNN-----EEK        | 494  |
| PBANKA_094010 | 445 | GFFKGNNTNIRNLQNLV-----INSIWNKSKDEFKIPIDENNVPMNIEKG        | 488  |
| PF3D7_1106800 | 495 | KKKNIIKFI--KNNKSLQNSNGEYYLINHLSKGICSDSIFYKSSQSKSSS        | 542  |
| PBANKA_094010 | 489 | KELNTNDQITGKKKKLKNK-----YINHIQKNI---SMLKKLNNASNES         | 530  |
| PF3D7_1106800 | 543 | QLSSPLSSPLSSPSSPSSPSSPSSPSSPSSPSSPSSPSSPSSPSSPSSPSS       | 592  |
| PBANKA_094010 | 531 | QSSNESVTQILSTS-----SESSFANIHSGLSSK                        | 559  |
| PF3D7_1106800 | 593 | PSSSPSSPPSPLSYKDNFPISSSCSSLERLPSYEKLLSSSQSNIEHIKN         | 642  |
| PBANKA_094010 | 560 | MLFHDKLEPEPIK-----PNKEKE-----                             | 578  |
| PF3D7_1106800 | 643 | LPLDVLSNNSANIKIKKSKSKYNNNDK---KEQKKLPLILNKSSSEFSP         | 689  |
| PBANKA_094010 | 579 | -----ENNPNSPIINSKNETNLLNDSNPTKLQDELP----KSPCSIDS          | 618  |
| PF3D7_1106800 | 690 | SHSYTSKSYHYNIKPSLQSSSNSSDSSYSISSTCSSSSSYVSSLYSNRS         | 739  |
| PBANKA_094010 | 619 | -----ESSSEKSETSETSSFCSEHSEFA-----                         | 643  |
| PF3D7_1106800 | 740 | NDILNFY-RNKIIKYCNNIYMNTKLAYSYMNGFIIPHEDLIFIHPIENYY        | 788  |
| PBANKA_094010 | 644 | ----NFHNNNKIVKYSNNIYINSSSLAFSYIYSFIIPPENLTFLYQIRNYY       | 689  |
| PF3D7_1106800 | 789 | MDNTNEKNNINNPYTKEKIMNHNFSFNTKNNTSFID---INTNI-----         | 829  |
| PBANKA_094010 | 690 | VRDVENDLNPNE-----LDFCDSFNFYKNCEI IKNRIINPGIRNCSYA         | 733  |
| PF3D7_1106800 | 830 | -----FSSNKQQNINNF-----KYKKMKSRMFKGKYMKGKEVAIKI            | 865  |
| PBANKA_094010 | 734 | SNH SKFQQNK RKYFNYS DCKNERKKT KPQKMKSRVFRGRYMGKDVAIKV     | 783  |
| PF3D7_1106800 | 866 | LVGKIKNFKKLHQILYNLYNLRHSNLVLMGVSIHYPFVFIIEYMKNKC          | 915  |
| PBANKA_094010 | 784 | LVGNIKNF TKFHKVLYKLYILRHTNIALIMGV SISYPFVFIIEYIKNLC       | 833  |
| PF3D7_1106800 | 916 | LFSYLHC IKYKHVYISTFLQRYK TLLHITQQEKIKKTNNINNNNNINHNN      | 965  |
| PBANKA_094010 | 834 | LFSYLHC VKYKH IYVSKLLKY-----QKKFINQNFQQNNTMSSDR           | 875  |
| PF3D7_1106800 | 966 | INNNNINHNNINHNNINNNNINNNNINNNNINYNKDYNK KKKKEDEQH NIEHQDT | 1015 |
| PBANKA_094010 | 876 | KYISNDDNEKI---NFDSRNILRNK LLEIKCKNNAKNKITEKNL KDEQI       | 922  |



## Supporting Information 8 – Sequencing data – pTKL\_RVxF1

### RAW DNA sequencing data

>PF3D7\_1106800\_SAM&RVxF1

```
AATTTAATTATTGAAAATTATCAGACATGGTCTTTAAGAGA---AGTAATTCAATGGCTTAT-----G-----  
-----TTAT-----GCAATG-  
-----TACCTGTAAATGGTTAATAAGTTTTTATAAAA---  
-----ATAAT-----ATAACAGGTGATAAATT-----AAAATATATTAATATAAAT-  
ACTATAAGAAATGAATTGGGGATTATTGCTTATGGACATGCAATCAAATATTACAATTA-----  
ATCAAAAATCTACAAGTT-ATGGCAT--ATAATAAAAAATTCAATAACTTAATACAAATAGAAGAATAT-  
AAAAATTATATAAGACAAAAGGAAAACACAAACAAAAATATAAAAAAAGGGAAAAATATAAAAAAAGAAAAAA  
GAAAAAAAAGAAAAAATATAAAAAAAGAAAAAAGAAAAAAGAAAGAAACAAAAAATTCAACAACATGG  
ATAAAAAATATATAGATTTAGCTATTCATAAAAATGTTAAGAATATACAAAATGATACTTTTTATAATAAGCATGAA  
AATATTTACAATTGTAAGAATCAAACAAATTTTATTTATCAAATGATTCTGAAATAAAAAAATCATGAATAAAAA  
GAAAGTATCATTTGAATATGATAATAATGAAGAAAAAAAAAAAAAAAAAATATTATTAATTTATAAAAAATAATAAA  
TCATTACAAAATTCAAATGGGGAATATTATTTAATAAATCACTTATCAAAGGTATATGTAGTGATAGCATATT-----  
-----  
-----TTATA-----AA-----  
-----  
-----
```

>RVxF1\_pETduET\_clone4\_petDown

```
GACTTGGATAACGTTAACTGTTACACATCATCACTG-  
GAGCTGACTATTTTCCGAGGCGTATTCATGCCATACGCGAAAAGTTTTGCGCATTTCGATGGGTCCGGGGATCTGGA  
CGGGTTGCCAGTATTCGGACTGCTGCATTAAGAAGCAGACCAGTAGTAGGGTTGAGAGCCGATGAGCACGCCGCC  
GCAAGGAAATGTGCATGCAAGGAGATGGCGCACACAGTCCCCCGCCTCGGGGCCTGCCACCATACCCACGCCG  
AAACAAGCGCTCATGAGCCGAAGTGGCGAAGCCCGATCTTCCCACGCGTG-----  
ATGTCGGCGATATAGGCGCCAGCAACCGCACCTGTGGCGCCGGTATGCCGGCCACGATGCGTCCGGCGTAGAG  
GATAGAGATCGATCTCGATCCCGCAAATTAATACGACTCACTATAGGGGAATTGTGAGCGGATAACAATTCCCCT  
CTAGAAATAATTTGTTAACTTTAAGAAGGAGATATACCATGGGCAGCAGCCATCACCATCATCACCACAGCCAG  
GATCCGAATCCAATACTTAATACAAATAGAAGAATAT-  
AAAAATTATATAAGACAAAAGGAAAACACAAACAAAAACATAAAAAAAGGGAAAAATATAAAAAAAGAAAAAA  
TATAAAAAAAGAAAAAATATAAAAAAAGAAAAAAGAAAAAAGAAAGAAACAAAAAATTCAACAACATGG  
ATAAAAAATATATAGATTTAGCTATTCATAAAAATGTTAAGAATATACAAAATGATACTTTTTATAATAAGCATGAA  
AATATTTACAATTGTAAGAATCAAACAAATTTTATTTATCAAATGATTTTGAATAAAAAAATCATGAATAAAAA  
GAAAGTATCATTTGAATATGATAATAATGAAGAAAAAAAAAAAAAAAAAATATTATTAATTTATAAAAAATAATAAA  
TCATTACAAAATTCAAATGGGGAATATTATTTAATAAATCACGTA-CAAAAATAAT-----  
-----  
-----
```

>RVxF1\_pETduET\_clone4\_petUp

-----CCTC-----

-----TTT-----

TTATAAAACTTATATAAGACAAAAGGAAAACACAAACAAAAACATAAAAAAAGGGAAAAATATAAAAAAGAAA  
AAAATATAAAAAAGAAAAAATATAAAAAAGAAAAAAGAAAAAAGAAAGAAACAAAAAATTCAACAAC  
ATGGATAAAAAATATATAGATTTAGCTATTCATAAAAATGTTAAGAATATACAAAATGATACTTTTTATAATAAGCA  
TGAAAATATTTACAATTGTAAGAATCAAACAAATTTTATTTATCAAATGATTCTGAAATAAAAAAATCATGAATA  
AAAAGAAAATATCATTTGAATATGATAATAATGAAGAAAAAAAAAAAAAAAAAATATTATTAATTTATAAAAAATAA  
TAAATCATTACAAAATTCAAATGGGGAATATTATTTAATAAATCACTTATCAAAGGTATATGTAGTGATAGCATAG  
CGGCCGCATAATGCTTAA--GTCGAACAGAAAGTAATCGTATTGTACACGGCCGCATAATCGA--  
AATTAATACGACTCACTATAGGGG-----AATTGTGAGCGGATAACAA-----  
TTCCCATCTTAGTATATTAGTTAAGTATAAGAAGGAGATATACATATGGCAGATCTCAATTGGATATCGGCCGGCC  
ACGCGATCGCTGACGTGCGGTACCCCTCGAGTCTGGTAAAGAAACCGCTGCTGCGAAAT--TTGAACGCCAG--C--  
ACATGGACTCGTCTACTAGCGCAGCTTAAT-----TAACCTA-----  
-----GGCTGCTGCCACCGCTGAG-CAATAACTAGCATAACCCCTTGGGGCCTCTAAACCGGGT--  
CTTGAGGGTTTTTTGCTGAAAG--  
GAGGAACTATATCCGGATTGGCGAATGGGACGCGCCCTGTAGCGGCGCATTAGCGCGGCGGGTGT-GGTG-----  
GTTACGCG-----CAGCGTGACGCTACACCTGGCTAGCGTCCTAAGCG-----  
CCCGCTTCGTTGCTTTCTGCGTACATCCGGCCACGTTG-----CCGGCTTTCCCGTT-----  
CAAGCTCTAAATCGGGGGGGGA-CTCCCCT-----ATTTATGGGG

>RVxF1\_pGEX\_clone4\_F

-----TCGGACGTT----TT--GGGT--GGTG-----

-----GCGACC-----

-----ATCCTCAAATCGGAT-----CTGGAA-----

GTTCTGTTCCAGGGGCCCTGGGAT-----

-----CC-----

CCGAATTCCAATAACTTAATACAAATAGAAGAATAT-  
AAAAATTATATAAGACAAAAGGAAAACACAAACAAAAATATAAAAAAAGGGAAAAATATAAAAAAGAAAAAA  
TATAAAAAAGAAAAAATATAAAAAAGAAAAAAGAAAAAAGAAAGAAACAAAAAATTCAACAACATGG  
ATAAAAAATATATAGATTTAGCTATTCATAAAAATGTTAAGAATATACAAAATGATACTTTTTATAATAAGCATGAA  
AATATTTACAATTGTAAGAATCAAACAAATTTTATTTATCAAATGATTCTGAAATAAAAAAATCATGAATAAAAA  
GAAAGTATCATTTGAATATGATAATAATGAAGAAAAAAA-  
AAAAAATATTATTAATTTATAAAAAATAATAAATCATTACAAAATTCAAATGGGGAATATTATTTAATAAATCACT  
TATCAAAGGTATATGTAGTGATAGCATAGCGGCCGCATCGTGACTGACTGACGATCTGCCT-



## Supporting Information 9 – Sequencing data pTKL\_SAM&RVxF1

### Raw DNA sequencing data

>PF3D7\_1106800\_SAM&RVxF1

```
AA-----  
-----  
-----T-----  
-----  
TTAATTATTGAAAATTATCAGACATGGTCTTTAAGAGAAGTAATTCAATGGCTTATGTTATGCAATGTACCTGTTAA  
ATGGTTAATAAGTTTTTATAAAAATAATATAACAGGTGATAAATTTAAATATATTAATATAAATACTATAAGAAATG  
AATTGGGGATTATTGCTTATGGACATGCAATCAAAATATTACAATTAATCAAAAATCTACAAGTTATGGCATATAAT  
AAAAAATTCATAACTTAATACAAATAGAAGAATATAAAAATTATATAAGACAAAAGGAAAACACAAACAAAATA  
TAAAAAAGGGAAAAATATAAAAAAAGAAAAAAGAAAAAAGAAAAAATATAAAAAAAGAAAAAAGAA  
AAAAAAGAAAGAAACAAAAAATTCACAACATGGATAAAAAATATATAGATTTAGCTATTCATAAAAATGTTAAG  
AATATACAAAATGATACTTTTTATAATAAGCATGAAAATATTTACAATTGTAAGAATCAAACAAATTTTATTTATCAA  
AATGATTCTGAAATAAAAAAATCATGAATAAAAAGAAAGTATCATTTGAATATGATAATAATGAAGAAAAA  
AAAAAATATTATTAATTTATAAAAAATAATAATCATTACAAAATTCAAATGGGGAATATTATTTAATAAATCACT  
TATCAAAGGTATATGTAGTGATAGCATA-----  
-----T-----T-T-----TAT-----  
-----  
-----A--AA
```

>SAM&RVxF1\_STOP\_revT7

```
AGGGG----CCG---AAGC-----  
-----  
-----  
TGATTCAGAGGAGGACCTGCATATGGCCATGGAGGCCGAATTTGACAAAATGAATATTTCCCTTCATGAAAAAA  
TGATAAAAAAATGGGAA-  
AAAAATGGGAAGAAAATAAGAAAAAACACTTTTTAAATATTTTTCAATAATATAGAAAATTTAATTATTGAAAA  
TTATCAGACATGGTCTTTAAGAGAAGTAATTCAATGGCTTATGTTATGCAATGTACCTGTTAAATGGTTAATAAGTT  
TTTATAAAAATAATATAACAGGTGATAAATTTAAATATATTAATATAAATACTATAAGAAATGAATTGGGGATTATT  
GCTTATGGACATGCAATCAAAATATTGCAATTAATCAAAAATCTACAAGTTATGGCATATAATAAATAATTCAATAA  
CTTAATACAAATAGAAGAATATAAAAATTATATAAGACAAAAGGAAAACACAAACAAAAATATAAAAAAAGGGAA  
AAATATAAAAAAAGAAAAAATATAAAAAAAGAAAAAATATAAAAAAAGAAAAAAGAAAAAAGAAAGAAA  
CAAAAAAATTCACAACATGGATAAAAAGTATATAGATTTAGCTATCCATAAAAATGTTAAGAATATACAAAATGA  
TACTTTTTATAATAAGCATGAAAATATTTACAATTGTAAGAATCAAACAAATTTTATTTATCAAATGATTCTGAAAT  
AAAAAATCATGAATAAAAAGAAAGTATCATTTGAATATGATAATAATGAAGAAAAA-  
AAAAAATATTATTAATTTATAAAAAATAATAATCATTACAAAATTCAAATGGGGAATATTATTTAATAAATCA  
CTTATCAAAGGTATATGTAGTGATAGCATAGGATCCGTCGACCTGCAGCGGCCGCATAACTAGCATAACCCCTTG  
GGCCTCTAACGGGTCTTG-  
AGGGGTTTTTTGCGCGCTTGCAAGCTAATTCGGGCGAATTTCTTATGATTTATGATTTTTATTATTAATAAG  
TTATAAAAAAATAAGG-----TTT-ACAAAT-----  
-----  
-----TAA--AT
```

>SAM&RvXF1\_STOP\_FT7

GGACATTATGCAGGAGAGAGC-----

-----  
-----  
TGATCTCAGAGGAGGACCTGCATATGGCCATGGAGGCCGAATTCGACAAAATGAATATATCCCTTCATGAAAAAA  
TGATAAAAAAATGAGAAAAAATGAGAAGAAAAATAAGAAAAAACTTTTTAAATATTTTTCAAATAATATA  
GAAAATTTAATTATTGAAAATTATCAGACATGGTCTTTAAGAGAAGTAATTCAATGGCTTATGTTATGCAATGTACC  
TGTTAAATGGTTAATAAGTTTTATAAAAATAATATAACAGGTGATAAATTAATATAAATACTATAA  
GAAATGAATTGGGGATTATTGCTTATGGACATGCAATCAAATATTGCAATTAATCAAAAATCTACAAGTTATGGC  
ATATAATAATAATTCAATAACTTAATACAAATAGAAGAATATAAAAAATTATATAAGACAAAAGGAAAACACAAAC  
AAAAATATAAAAAAAGGGAAAAATATAAAAAAGAAAAAATATAAAAAAGAAAAAATATAAAAAAGAAAA  
AAAGAAAAAAGAAAGAAACAAAAAATCAACAACATGGATAAAAAGTATATAGATTTAGCTATCCATAAAAA  
TGTTAAGAATATACAAATGATACTTTTTATAATAAGCATGAAAATTTTACAATTGTAAGAATCAAACAAATTTTAT  
TTATCAAAATGATTCTGAAATAAAAAAATCATGAATAAAAAGAAAGTATCATTGAATATGATAATAATGAAGAA  
AAAAA-

AAAAAAATATTATTAATTTATAAAAAATAATAATCATTACAAAATTCAAATGGGGAATATTATTTAATAAATCA  
CTTATCAAAGGTATATGTAGTGATAGCATAGGATCCGTCGACCTGCAGCGCCGCATAACTAGCATAACCCCTTG  
GGCCTCTAACGGGTCTTGGAGGGTTTTTTCGCGCTTGCAGCCAAGCTAATCCGGGCGAATTTCTTATGATTT  
ATGATTTTTATTATTAATAAGTTATAAAAAAATAAGTGAATCAAATTTTAAAGGGACTCTTAGGTTTTA-  
AAACG-----

-----AAAATCC

>SAM&RvXF1\_cloneJ3\_R

CCC-----

CAACCCCAAAGTTTCCGGTGATTAGGGCAATTTGCCAGGATGGGATCCAAGCTTGAAAGACTGGAACAGGTATTTT  
CCGGATTTTCTCGGAGAACCTTGCAATGATTTGAAAATGGATTCTTCCAGGGATTAAAGCATTGTTACCAGGATT  
ATTGTCCAAGATAATGTGAATAAAGATGCCGTCACAGATAGATTGGCTTCAGTGGAGACTGATATGCTTTTAACATT  
GAGACAGCATAGAATAAGTGGGACATCATCATCGGAAGGGAGTAGTACCAAAGGTCAAAGACAGTTGACTGTATC  
GCCGGAATTTGTAATACGACTCACTATAGGGCGAGCCGCCATCATGGAGGAGCAGAAGCTGATTTAGAGGAGGA  
CCTGCATATGGCCATGGAGGCCGAATTCGACAAAATGAATATATCCCTTCATGAAAAAATGATAAAAAAATGAG  
AAAAAATGAGAAGAAAAATAAGAAAAAAACTTTTTAAATATTTTTCAAATAATATAGAAAATTTAATTATTGA  
AAATTATCAGACATGGTCTTTAAGAGAAGTAATTCAATGGCTTATGTTATGCAATGTACCTGTTAAATGGTTAATAA  
GTTTTATAAAAAATAATAACAGGTGATAAATTAATATAAATACTATAAGAAATGAATTGGGGATT  
ATTGCTTATGGACATGCAATCAAATATTGCAATTAATCAAAAATCTACAAGTTATGGCATATAATAAAAAATCAA  
TAACTTAATACAAATAGAAGAATATAAAAAATTATATAAGACAAAAGGAAAACACAAACAAAAATATAAAAAAGG  
GAAAAATATAAAAAAGAAAAAATATAAAAAAGAAAAAATATAAAAAAGAAAAAAGAAAAAAGAAAAAAGAAAG  
AAACAAAAAATTCACAACATGGATAAAAAGTATATAGATTTAGCTATCCATAAAAATGTTAAGAATATACAAAA  
TGATACTTTTTATAATAAGCATGAAAATTTTACAATTGTAAGAATCAAACAAATTTTATTTATCAAAATGATTCTGA  
AATAAAAAAATCATGAATAAAAAGAAAGTATCATTGAATATGATAATAATGAAGAAAAAAAAAAAAAAAAAATATT  
ATTAATTTATAAAAAATAATAATCATTACAAAATTCAAATGGGGAATATTAT-TAATAATCACT-  
ATCAAAAGGGG-----





## Supporting Information 10 – Sequencing data pTKL\_KD\_WT and mutants

### Raw DNA sequencing data

>Synthetic\_pTKL\_KD\_WT

-----  
-----  
GAATTCGACAATCACATTTACTGCAATAACATTTACGATCACCACAAAAACACGTCATTGAACTCGAAAGAACAAAA  
TACGGACCATAACATCGAACAGATTAATGAGTGTAACAAATATGCCAGTGAAACCAAATACAACATTAAGAAATCG  
AACCTGAAGAATAACATTATCTCGCATAAGAACTCCAGAAATGCAATCAGATTCAGATGAACCAACCTACACGTT  
TCCACCATATCAGAAAGAACTGAGCTCTTATCTTAAAAACGAAAAGATCAAACGGAAACGCAAAGTGCTGTTTTCC  
TACCTGAAAACCCATATTCACCTCAACAGTCAGCAGATTAACGATCAACACAATCGCTTATCTGTGCAGAAAATTAT  
GAAAATCATTACTGATGTCACCCTTGCTTGACATATCTGGAAAAGGAGAAAATGAGCCCCATTAATCTGAAACCTA  
CCAATATCCTGTTGGACGAATCTCTGAATGCCAAAATTAGCGATTTCCGGTATCAGCAAATTGAGAATTGTCTGGAT  
ATGAACATTGACTATTCATACAAAATTAGCTCCAACCTCAGTCATCAAATTAATAAAAAAGAATATGAGCAAAGA  
AAGCGAAGAAAATCAAATTGTGAATAAAAAACAATAATGACTTACTGTACCTGTACGATCACAATAACAACGTCTA  
TAAGTACAATACCCAATATATCGACGTAACCTATAACAACAGTTATCCGAGCATCTTCTATTGGACTCCTCCGGAAA  
TCTTACGTGGCAAAAAACAAGAAATTTACAGCGATATTTACGCATTTGGGATCATCCTCTGGGAAATGCTGAG  
TAATGATATCCGTACAACATCCGTTTGCATCCCATATTATGGCCGTTGTAGGCTATGCGAATGAAGAACTGTCAT  
TCAACAACATTCCGGTTTCCATTAGTCGTTGATCAAAGCGTGTGTTAATCGCAACAAATATAAGCGTCCGACGTTT  
GAGCATATTCTGAAAACGATCTCTACACTCTATCAGAAAAGCGAATACCAAAGTGGAAGATGCTCTTATCAGCTTTAT  
GGATGGTACTCTCGAGCATCATCACCATCATCATTAAAGGATCC-----  
-----

>pTKL\_KD\_ND\_clone3\_R

-----  
-----  
--ATC-----CGGAAGCAAATCGGCCTTAACTTGA--CGGTAA--GGGGTACCAA--TTCCCGTG-  
-ACCAATCCACCTT---AGAATTGACCTGAAGAATACCTTT-TCTGCCATAAG-ACTTCCAGAAA-  
GCAATCAGATTCAGATGAACCAACCTACCACGTTTCCACCATTTCAGAAGGAACTGAGTTCTTATCTT-  
AAAACGAAAAGATCAAACGGAAACGCAAAGTGCTGT-TTCCTACCTGAAAACCCATA-  
TCACTTCAACAGTCAGCAGATTAACGATCAACACAATCGCTTATCTGTGCAGAAAATTATGAAAATCATTACTGATG  
TCACCCTTGCTTGACATATCTGGAAAAGGAGAAAATGAGCCCCATTGATCTGAAACCTACCAATATCCTGTTGGAC  
GAATCTCTGAATGCCAAAATTAGCGATTTCCGGTATCAGCAAATTGAGAATTGTCTGGATATGAACATTGACTATTC  
ATACAAAATTAGCTCCAACCTCAGTCATCAAATTAATAAAAAAGAATATGAGCAAAGAAAGCGAAGAAAATCAA  
AATTGTGAATAAAAAACAATAATGACTTACTGTACCTGTACGATCACAATAACAACGTCTATAAGTACAATACCCAAT  
ATATCGACGTAACCTATAACAACAGTTATCCGAGCATCTTCTATTGGACTCCTCCGGAAATCTTACGTGGCAAAAA  
AACAAGAAATTTTACAGCGATATTTACGCATTTGGGATCATCCTCTGGGAAATGCTGAGTAATGATATCCGTACAA  
CTATCCGTTTGCATCCCATATTATGGCCGTTGTAGGCTATGCGAATGAAGAACTGTCATTCAACAACATTCCGGTTT  
CCATTAGTCGTTGATCAAAGCGTGTGTTAATCGCAACAAATATAAGCGTCCGACGTTTGGATATTCTGAAAACG  
ATCTCTACACTCTATCAGAAAAGCGAATACCAAAGTGGAAGATGCTCTTATCAGCTTTATGGATGGTACTCTCGAGCA  
TCATCACCATCATCATTAAAGGATCCTCTAGAGTCGACCTGCAGGCAAGCTTGGCACTGGCCGTCGTTTTACAACGTC

GTGACTGGGAAAACCCTGGCGTTACCCAACCTAATCGCCTTGCAGCACATCCCCCTTCGCCAGCTGGCGTAATAGC  
GAAGAGGCCCGCACCGATCGCCCTTCCCAACAGTGCGCAGCAGTAAGTGGAAGTCC

>pTKL\_KD\_DG\_clone9\_R

-----  
-----  
-----CGGTG--ACCA-----  
-----CCCTCCCGTTTCCCCATT--AGAAGGACTGAGTT-TTATTCT-  
AAAACGAAAAGATCAAACGGAAACGCAAAGTGCTGT-  
TTCCTACCTGAAAACCCATATTCACCTTCAACAGTCAGCAGATTAACGATCAACACAATCGCTTATCT-  
TGCAGAAAATTATGAAAATCATTACTGATGTCACCCTTGCTTGCACATATCTGGAAAAGGAGAAAATGAGCCCCAT  
TAATCTGAAACCTACCAATATCCTGTTGGACGAATCTCTGAATGCCAAAATTAGCGGTTTCGAAATCAGCAAATTG  
AGAATTGTCTGGATATGAACATTGACTATTCATACAAAATTAGCTCCAACCTCAGTCATCAAATTAATAAAAAAGAA  
TATGAGCAAAGAAAGCGAAGAAAATCAAAATTGTGAATAAAAACAATAATGACTTACTGTACCTGTACGATCACA  
ATAACAACGTCTATAAGTACAATACCCAATATATCGACGTAACCTATAACAACAGTTATCCGAGCATCTTCTATTGG  
ACTCCTCCGGAAATCTTACGTGGCAAAAAAACAAGAAATTTACAGCGATATTTACGCATTTGGGATCATCCTCTG  
GGAAATGCTGAGTAATGATATTCGTAACAATATCCGTTTGCATCCCATATTATGGCCGTTGTAGGCTATGCGAATG  
AAGAACTGTCATTCAACAACATTCCGGTTTCCATTAGTCGTTGATCAAAGCGTGTGTTAATCGCAACAAATATAAG  
CGTCCGACGTTTGAGCATATTCTGAAAACGATCTCTACACTCTATCAGAAAGCGAATACCAAAGTGGAAGATGCTC  
TTATCAGCTTTATGGATGGTACTCTCGAGCATCATCACCATCATCATTAAAGGATCCTCTAGAGTCGACCTGCAGGCA  
AGCTTGGCACTGGCCGTCGTTTTACAACGTCGTGACTGGGAAAACCCTGGCGTTACCCAACCTAATCGCCTTGCAG  
CACATCCCCCTTCGCCAGCTGGCGTAATAGCGAAGAGGCCCGCACCGATCGCCC-TCCCAACAGTGCGCAGCGA-  
AGTCGAAGTTCC

>pTKL\_KD\_KRIMAS\_cloneB\_R

-----  
-----  
-----AGAAGAACAATCGGGCCAACTTGGACCGTTAA-GGGGGTAACAAAT-  
TGCCCGTG-AACCAAATCCACCTT--AAGATTGGACCTGAAGAATACCATT-TCTCGATAAG-  
ACTTCCAGAAATGCAATCAGATTCAGATGAACCAACCCTACACGTTTCCACCATATCAGAAAAGAACTGAGCTTTAT  
CTT-  
AAAACGAAAAGATCAAACGGAAACGCATAATGGCGTCTTCTACCTGAAAACCCATATTCACCTTCAACAGTCAGCA  
GATTAACGATCAACACAATCGCTTATCTGTGCAGAAAATTATGAAAATCATTACTGATGTCACCCTTGCTTGCACAT  
ATCTGGAAAAGGAGAAAATGAGCCCCATTAATCTGAAACCTACCAATATCCTGTTGGACGAATCTCTGAATGCCAA  
AATTAGCGATTTCCGGTATCAGCAAATTGAGAATTGTCTGGATATGAACATTGACTATTCATACAAAATTAGCTCCA  
ACTCAGTCATCAAATTAATAAAAAAGAAATATGAGCAAAGAAAGCGAAGAAAATCAAAATTGTGAATAAAAACA  
ATAATGACTTACTGTACCTGTACGATCACAATAACAACGTCTATAAGTACAATACCCAATATATCGACGTAACCTAT  
AACAACAGTTATCCGAGCATCTTCTATTGGACTCCTCCGGAAATCTTACGTGGCAAAAAAACAAGAAATTTTACAG  
CGATATTTACGCATTTGGGATCATCCTCTGGGAAATGCTGAGTAATGATATTCGTAACAATATCCGTTTGCATCCC  
ATATTATGGCCGTTGTAGGCTATGCGAATGAAGAAGTGTCAACAACATTCCGGTTTCCATTAGTCGTTGATC  
AAAGCGTGTGTTAATCGCAACAAATATAAGCGTCCGACGTTTGGAGCATATTCTGAAAACGATCTCTACACTCTATCA  
GAAAGCGAATACCAAAGTGGAAGATGCTCTTATCAGCTTTATGGATGGTACTCTCGAGCATCATCACCATCATCATT

AAGGATCCGT-----GGCAGCTCTAGAGCTAGC-----GAATTCCTTTGGTGAAAT-----  
----TGTTATCCGCTCACAATCCA-----CACATCAATGG-----

>pTKL\_KD\_KRIMAS\_cloneB\_F

-----CCACCGCT-----  
CGCGGTTGGCGGGTGTCCGG--GCTGGCTTAACTATGCGGCAT---  
CAGAGCAGATTGTAAGTACTGAGAGTTTGGCAATTG-----  
GTCGACCTCGAGGGCGCGCCCGTAGAATTCGACAATCACATTTACTGCAATAACATTTACGATCACCACAAAAACA  
CGTCATTGAACTCGAAAGAACAAAATACGGACCATAACATCGAACAGATTAATGAGTGTAACAAATATGCCAGTGA  
AACCAATACAACATTAAGAAATCGAACCTGAAGAATAACATTATCTCGCATAAGAAGCTTCCAGAAATGCAATCAG  
ATTCAGATGAACCAACCTACACGTTTCCACCATATCAGAAAGAACTGAGCTCTTATCTTAAAAACGAAAAGATCAA  
ACGGAAACGCATAATGGCGTCTTCTACCTGAAAACCCATATCACTTCAACAGTCAGCAGATTAACGATCAACACA  
ATCGCTTATCTGTGCAGAAAATTATGAAAATCATTACTGATGTCACCCTTGCTTGCACATATCTGGAAAAGGAGAAA  
ATGAGCCCCATTAATCTGAAACCTACCAATATCCTGTTGGACGAATCTCTGAATGCCAAAATTAGCGATTCGGTAT  
CAGCAAAATTGAGAATTGCTGGATATGAACATTGACTATTCATACAAAATTAGCTCCAACCTCAGTCATCAAAATTA  
ATAAAAAAGAATATGAGCAAAAGAAAGCGAAGAAAATCAAATTGTGAATAAAAAACAATAATGACTTACTGTACC  
TGTACGATCACAATAACAACGTCTATAAGTACAATACCCAATATATCGACGTAACCTATAACAACAGTTATCCGAGC  
ATCTTCTATTGGACTCCTCCGAAAATCTTACGTGGC-  
AAAAAAACAAGAAATTTTACAGCGATATTTACGCATTTGGGATCATCCTCTGGGAAATGCTGAGTAATGATATTCC  
GTACAACCTATCCGTTTGCAT-CCATATTATGGCCGTTGTAGGCTATGCGAATGAAG-ACTGTCATTC-  
ACAACATTCCGGTTTCTTTC-GTCGTTGATCAAAGCGTG-GGTAATCGCA--  
CAAATAAACGTCCGAAGTTTGGAGCA-ATTCTGAAAA-GATCTCTACTTTTTC---AAAAGCGAA-ACCAAGG-----  
-----  
-----

>pTKL\_KD\_ND\_clone3\_F

ATTTGAGATTGGGCGAAAGATCCACGTATTGCCGCCACTATGGAAAACGCCAGAAAGGTGAAATCATGCCGAAC  
ATCCCGCAGATGTCCGCTTTCTGGTATGCCGTGCGTACTGCGGTGATCAACGCCGCCAGCGGTGTCAGACTGTGCG  
ATGAAGCCCTGAAAGACGCGCAGACTAATTCGAGCTCGAACAACAACAATAACAATAACAACCTCGGGA  
TCGAGGGAAAGGATTCAGAATTCGACAATCACATTTACTGCAATAACATTTACGATCACCACAAAAACACGTCATTG  
AACTCGAAAGAACAAAATACGGACCATAACATCGAACAGATTAATGAGTGTAACAAATATGCCAGTGAACCAAAA  
TACAACATTAAGAAATCGAACCTGAAGAATAACATTATCTCGCATAAGAAGCTTCCAGAAATGCAATCAGATTCAGAT  
GAACCAACCTACACGTTTCCACCATATCAGAAAGAACTGAGCTCTTATCTTAAAAACGAAAAGATCAAACGGAAA  
CGCAAAGTGCTGTTTTCTACCTGAAAACCCATATCACTTCAACAGTCAGCAGATTAACGATCAACACAATCGCTT  
ATCTGTGCAGAAAATTATGAAAATCATTACTGATGTCACCCTTGCTTGCACATATCTGGAAAAGGAGAAAATGAGC  
CCCATTGATCTGAAACCTACCAATATCCTGTTGGACGAATCTCTGAATGCCAAAATTAGCGATTTCCGGTATCAGCAA  
AATTGAGAATTGCTGGATATGAACATTGACTATTCATACAAAATTAGCTCCAACCTCAGTCATCAAAATTAATAAAA  
AAGAATATGAGCAAAAGAAAGCGAAGAAAATCAAATTGTGAATAAAAAACAATAATGACTTACTGTACCTGTACG  
ATCACAATAACAACGTCTATAAGTACAATACCCAATATATCGACGTAACCTATAACAACAGTTATCCGAGCATCTTC  
TATTGGACTCCTCCGAAAATCTTACGTGGC-AAAAAAACAAGGAATTTTACAGGGA-ATTACGCATTTGGGATC-  
TCCTTCTGGGAATGGTGAAGTAAGGA-ATTCCGGAC-ACTATCCGTTT-CAT-  
CCCATTTAGGGCGGTGGAAGCTAAGC-AATGAAAATGGCTTCCA---AACATTCCGGTTCC-----

TTACCGCTTGAACAACGTGGGAATCCCA--AAAATAAGGCGCC---AGTTGGAA---TTTCCGAAAG-----  
TCTCCTCCTTCAAAGGAAAC-----AAGGGGAAGTTCTCCCTTTGG-----  
GGGGTCCGG-----CACCCCCCTTT-----  
-----

>pTKL\_KD\_DG\_clone9\_F

CCGGGGTGTGGGCGAGATCCACGTATTGCCGCCACTATGGAAAACGCCAGAAAGGTGAAATCATGCCGAACATC  
CCGCAGATGTCCGCTTTCTGGTATGCCGTGCGTACTGCGGTGATCAACGCCGCCAGCGGTCTGCAGACTGTGATG  
AAGCCCTGAAAGACGCGCAGACTAATTCGAGCTCGAACAACAACAATAACAATAACAACAACCTCGGGATCG  
AGGGAAGGATTTGAGAATTCGACAATCACATTTACTGCAATAACATTTACGATCACCACAAAACACGTCATTGAAC  
TCGAAAGAACAATAACGGACCATAACATCGAACAGATTAATGAGTGTAACAAATATGCCAGTGAAACCAATAC  
AACATTAAGAAATCGAACCTGAAGAGTAACATTATCTCGCATAAGAAGTCCAGAAATGCAATCAGATTCAGATGA  
ACCAACCCTACACGTTTCCACCATATCAGAAAGAACTGAGCTCTTATCTTAAAAACGAAAAGATCAAACGGAAACG  
CAAAGTGCTGTTTTCTACCTGAAAACCCATATTCACCTCAACAGTCAGCAGATTAACGATCAACACAATCGCTTATC  
TGTGCAGAAAATTATGAAAATCATTACTGATGTCACCCCTTGCTTGACATATCTGGAAAAGGAGAAAATGAGCCCC  
ATTAATCTGAAACCTACCAATATCCTGTTGGACGAATCTCTGAATGCCAAAATTAGCGGTTTCGAAATCAGCAAAT  
TGAGAATTGTCTGGATATGAACATTGACTATTCATACAAAATTAGCTCCAACCTCAGTCATCAAATAATAAAAAAG  
AATATGAGCAAAGAAAGCGAAGAAAATCAAATTTGTGAATAAAAACAATAATGACTTACTGTACCTGTACGATCA  
CAATAACAACGTCTATAAGTACAATACCCAATATATCGACGTAACCTATAAC-  
ACAGTTATCCGAGCATCTTCTATTGGACTCCTCCGGAATCTTACGTGGC-AAAAAACA--GAAATTTTCAGCGA-  
TATTACGC-TTTGGGATC-TCCCCTGGGAAA-----  
-----  
-----  
-----

## Proteins

>PF3D7\_1106800\_KD

DNHIYCNNIYDHHKNTSLNSKEQNTDHNIEQINECNKYASETKYNIKSNLKNIIISHKNFQKCNQIQMNQPYTFPPYQK  
ELSSYLKNEKIKRKRKVLFSYLKTHIHFNSSQINDQHNRLSVQKIMKIITDVTLACTYLEKEKMSPINLKPTNILLDESLNAKIS  
DFGISKIENCLDMNIDYSYKISSNSVIKINKKEYEQKAKKIKIVNKNNDLLYLDHNNNVYKYNTQYIDVTYNNPSYPSIF  
WTPPEILRGKKNKFYSDIYAFGIILWEMLSDIPYNYPFASHIMAVVGYANEELSFNNIPVSIQSLIKACVNRNKYKRPTF  
EHILKTISTLYQKANTKVEDALISFMDGT-----

>pTKL\_KD\_DG

EFDNHIYCNNIYDHHKNTSLNSKEQNTDHNIEQINECNKYASETKYNIKSNLKSNIISHKNFQKCNQIQMNQPYTFPPY  
QKELSSYLKNEKIKRKRKVLFSYLKTHIHFNSSQINDQHNRLSVQKIMKIITDVTLACTYLEKEKMSPINLKPTNILLDESLNA  
KISGFESKIENCLDMNIDYSYKISSNSVIKINKKEYEQKAKKIKIVNKNNDLLYLDHNNNVYKYNTQYIDVTYNNPSYPSI  
FYWTPPEILRGKKNKFYSDIYAFGIILWEMLSDIPYNYPFASHIMAVVGYANEELSFNNIPVSIQSLIKACVNRNKYKRP  
TFEHILKTISTLYQKANTKVEDALISFMDGTLEHHHHHH

>pTKL\_KD\_KRIMAS

EFDNHIYCNNIYDHHKNTSLNSKEQNTDHNIEQINECNKYASETNYNIKSNLKNNIISHKNFQKCNQIQMNQPYTFPPY  
QKELSSYLKNEKIKRKRIMASSYLKTHIHFNSSQQINDQHNRLSVQKIMKIITDVTLACTYLEKEKMSPINLKPTNILLDESLN  
AKISDFGISKIENCLDMNIDYSYKISSNSVIKINKKEYEQKKAKKIKIVNKNNDLLYLDHNNNVYKYNTQYIDVTYNNNSYP  
SIFYWTPPEILRGKKNKKFYSDIYAFGIILWEMLSDIPYNYPFASHIMAVVGYANEELSFNNIPVSIQSLIKACVNRNKYKR  
PTFEHILKTISTLYQKANTKVEDALISFMDGTLEHHHHHH

>pTKL\_KD\_ND

EFDNHIYCNNIYDHHKNTSLNSKEQNTDHNIEQINECNKYASETNYNIKSNLKNNIISHKNFQKCNQIQMNQPYTFPPY  
QKELSSYLKNEKIKRKRKVLFSYLKTHIHFNSSQQINDQHNRLSVQKIMKIITDVTLACTYLEKEKMSPIDLKPTNILLDESLNA  
KISDFGISKIENCLDMNIDYSYKISSNSVIKINKKEYEQKKAKKIKIVNKNNDLLYLDHNNNVYKYNTQYIDVTYNNNSYPSI  
FYWTPPEILRGKKNKKFYSDIYAFGIILWEMLSDIPYNYPFASHIMAVVGYANEELSFNNIPVSIQSLIKACVNRNKYKRP  
TFEHILKTISTLYQKANTKVEDALISFMDGTLEHHHHHH

>pTKL\_KD\_WT

EFDNHIYCNNIYDHHKNTSLNSKEQNTDHNIEQINECNKYASETNYNIKSNLKNNIISHKNFQKCNQIQMNQPYTFPPY  
QKELSSYLKNEKIKRKRKVLFSYLKTHIHFNSSQQINDQHNRLSVQKIMKIITDVTLACTYLEKEKMSPINLKPTNILLDESLNA  
KISDFGISKIENCLDMNIDYSYKISSNSVIKINKKEYEQKKAKKIKIVNKNNDLLYLDHNNNVYKYNTQYIDVTYNNNSYPSI  
FYWTPPEILRGKKNKKFYSDIYAFGIILWEMLSDIPYNYPFASHIMAVVGYANEELSFNNIPVSIQSLIKACVNRNKYKRP  
TFEHILKTISTLYQKANTKVEDALISFMDGTLEHHHHHH

## Supporting Information 11 – Sequencing data *PfSERA5* recombinant protein

### Raw DNA sequencing data

>PF3D7\_0207600\_SERA5

ATGAAGTCATATATTTCTTGTGTTTTTCATATTGTGTGTTATATTTAACAAAAATGTTATAAAATGTACAGGAGAAAAGT  
CAAACAGGTAATACAGGAGGAGGTCAAGCAGGTAATACAGGAGGAGATCAAGCAGGTAGTACAGGAGGAAGTC  
CACAAGGTAGTACGGGAGCAAGTCCACAAGGTAGTACGGGAGCAAG---  
TCCACAAGGTAGTACGGGAGCAAGTCAACCCGGAAGTCCGAACCAAGCAATCCTGTAAGTCCGGACATTCTGTA  
AGTACTGTATCAGTATCACAACTTCAACTTCTCAGAAAAACAGGATACAATTCAAGTAAAATCAGCTTTATTTAA  
AGATTA-----TA-  
TGGGTTTAAAAGTTACTGGTCCATGTAACGAAAATTTCATAATGTTCTTAGTTCCTCATATATATATTGATGTTGATA  
CAGAAGATACTAATATCGAATTAAGAACAACATTGAAAAAACAATAATGCAATATCATTGAATCAAACAGTGG  
TTCATTAGAAAAAATAATATGTAAACTACCATCAAATGGTACAACCTGGTGAACAAGTTCAAGTACGGGAACA  
GTTAGAGGAGATACAGAACCAATTTCAAGTCAAGCTCAAGTCAAGTCAAGTCTAGTTCAGTTCAGTTCAGTTCAA  
GTTCAAGTTCAGTTCAGTTCAGTTCAGTTCAGTTCAGTTCAGTTCAGTTCAGTTCAGTTCAGTTCAGTTCAGTTCAG  
CGCCAAGAAATTTACAAAATATATGTGAACTGGAAAAAATTTCAAGTTGGTAGTATATATTAAGGAGAATACATT  
AATACTTAAATGGAAAGTATACGGAGAAACAAAAGATACTACTGAAAATAACAAAGTTGATGTAAGAAAGTATTT  
GATAAATGAAAAGGAAACCCCATTTACTAATACTAATAACATACGCGTATAAAGAACATAATGGAACAACTTAATA  
GAAAGTAAAACTACGCAATAGGATCAGACATTCCAGAAAAATGTGATACCTTAGCTTCCAATTGCTTTTTAAGTG  
GTAATTTTAAACATTGAAAAATGCTTTCAATGTGCTCTTTAGTAGAAAAAGAAAATAAAAATGACGTATGTTACAAA  
TACCTATCTGAAGATATTGTAAGTAAATTCAAAGAAATAAAAAGC---TGAGACAGAAGATGAT-  
GATGAAGATGATTATACTGAATATAAATTAACAGAA----  
TCTATTGATAATATATTAGTAAAAATGTTTAAAACAAATGAAAATAATGATAAATCAGAATTAATAAAATTAGAAGA  
AGTAGATGATAGTTTGAAATTAGAATTAATGAATTAAGTACTGTAGTTTACTTAAAGACGTAGATACAACAGGTACCTTAG  
ATAATTATGGGATGGGAAAT-  
GAAATGGATATATTTAATAACTTAAAGAGATTATTAATTTATCATTGAGAAGAAAATATTAATACTTTAAAAAATAA  
ATTCCGTAATGCAGCTGTATGTCTTAAAATGTTGATGATTGGATTGTAATAAGAGAGGTTTAGTATTACCTGAAT  
TAAATTATGATTTAGAATATTTCAATGAACATTTATATAATGATAAAAATTTCTCCAGAAGATAAAGATAATAAGGA  
AAAGGTGTCGTACATGTTGATACAACCTTTAGAAAAAGAAGATACTTTATCATATGATAACTCAGATAATATGTTTTG  
TAATAAAGAATATTGTA--  
ACAGATTAAGATGAAAATAATTGTATATCTAATCTTCAAGTTGAAGATCAAGGTAATTGTGATACTTCATGGATT  
TTTGCTTCAAATATCATTAGAACTATTAGATGTATGAAAGGATATGAACCTACAAAATTTCTGCTCTTTATGTA  
GCTAATTGTTATAAAGGTGAACATAAAGATAGATGTGATGAAGGTTCTAGTCCAATGGAATTCCTACAAATTATTG  
AAGATTATGGATTCTTACCAGCAGAATCAAATTATCCATATAACTATGTGAAAGTTGGAGAACAATGTCCAAAGGT  
AGAAGATCACTGGATGAATCTATGGGAT-----A---ATGGAAAAAT-----  
CTTACATAACAAAATGAACCTAATAGTTTATAGATGGTAAGGGATATACTGCATATGAAAGTGAAAGATTTTCATGAT  
AATATGGATGCATTTGTTAAAATTATTAAACTGAAGTAATGAATAAAGGTTTCAGTTATTGCATATATTAAGCTGA  
AAATGTTATGGGATATGAATTTAGTGAAAGAAAGTACAGAACCTTATGTGGTGTGATACAGCTGATCATGCAGTT  
AATATTGTTGGTTATGGTAATTATGTGAATAGCGAAGGAGAAAAAATCCTATTGGATTGTAAGAAACAGTTGGG  
GTCCATATTGGGAGATGAAGGTTATTTAAAGTAGATATGTATGGACCAACTCATTGTCATTTTAACTTTATTCAC  
AGTGTGTTTATATCAATGTTGATTACCTATGAATAATAAACAACATAAAAAGAATCAAAAATATATG-  
ATTATTATTTAAAGCCTCTCCAGAATTTTATCATAACCTTTACTTTAAGAATTTTAAATGTTGGTAAGAAAAATTTATT





-----ACGACTCACTATAGGGGAATTGTGAGCGGATA-----ACA--ATTCCCCTCTAG--  
AAATAATTTTGTTTAACTTTAAGAAGGAGATATACCA-TGGGC----AG---CAG-CCAT--CAC-----CATCATCA-----  
--CC--ACAGCC--  
AGGATCCGGATACAGAAGATACTAATATCGAATTAAGAACAACATTGAAAAAACAATAATGCAATATCATTGTA  
ATCAAACAGTGGTTCATTAGAAAAAATAATGTAAAACCTACCATCAAATGGTACAACCTGGTGAACAAGGTTCA  
AGTACGGGAACAGTTAGAGGAGATACAGAACCAATTTAGATTCAAGCTCAAGTTCAAGTTCAAGCTCTAGTTCAA  
GTTCAAGTTCAAGTTCAAGTTCTAGTTCAAGTTCTAGTTCAAGTTCAAGTTCAAGTTCAAGTTCAAGTTCAAGTTCA  
CTACTGTAAACCGCCAAGAAATTTACAAAATATATGTGAAACTGGAAAAACTTCAAGTTGGTAGTATATATTAAG  
GAGAATACATTAATACTTAAATGGAAAGTATACGGAGAAACAAAAGATACTACTGAAAATAACAAAGTTGATGTA  
AGAAAGTATTTGATAAATGAAAAGGAAACCCATTTACTAATATACTAATACATGCGTATAAAGAACATAATGGAA  
CAAACCTAATAGAAAGTAAAACTACGCAATAGGATCAGACATTCCAGAAAAATGTGATACCTTAGCTTCCAATTG  
CTTTTAAGTGGTAATTTAACATTGAAAAATGCTTTCAATGTGCTCTTTTAGTAGAAT-----TC-----  
----G-----AGC--TC-----GGC-G-----CG---CCT-----  
-----GCA-----G-----  
--G-----TC-GACAAG-----C-----TTGCGGCCGCAT-----  
AATGCT-----TAAG-----TC--GAACA-----GAA---AGT-  
AA-----TC-----GT-----ATTGTACACGGCCGCA-----  
---TA-----ATC-----GAA-----AT--TAATA-----CG-ACTCA-----  
-----CTA-----TA--GG-----GGA-----AT----T--  
-----GTGAG--CGGATAACAATTCCCC-----ATC-----TTA-----  
-----GTA-----TATTAGTT-AAG-----TAT-----  
-----AAAA-----AGGAGA-  
-----TATA-----CATA-----TGG-----GC-----AGATCTC-AA----T---TGGATA--TC-----  
-----C-----GGCC-----GGCCC-CCCGA-----  
-----T---CGCTG-----ACGTC--GGTAC-----  
-----CC-----TCCA----G---TCTG-----GG-----  
-----AA-----AAAAACC----GCTGCC-TG----  
CCAAATTTGA---A--C---G-----CAA

>SERA5\_Y2H\_3457

AGA-----T-----G---AGA-----CATA-----C-----G--ACG-----TAC-----  
CAGAT-----TACG-----CTCA-----  
-----  
TATGAAGCAGTGGTATCAACGCAG----AG---TGG-CCAT-----T-----ACGGCC-----  
GGGGATACAGAAGATACTAATATCGAATTAAGAACAACATTGAAAAAACAATAATGCAATATCATTGAAATCAA  
ACAGTGGTTCATTAGAAAAAATAATGTAAAACCTACCATCAAATGGTACAACCTGGTGAACAAGGTTCAAGTAC  
GGGAACAGTTAGAGGAGATACAGAACCAATTTAGATTCAAGCTCAAGTTCAAGTTCAAGTTCAAGTTCAAGTTCA  
AGTTCAAGTTCAAGTTCTAGTTCAAGTTCTAGTTCAAGTTCAAGTTCAAGTTCAAGTTCAAGTTCAAGTTCAAGTTCA  
GTAAACCGCCAAGAAATTTACAAAATATATGTGAAACTGGAAAAACTTCAAGTTGGTAGTATATATTAAGGAGA  
ATACATTAATACTTAAATGGAAAGTATACGGAGAAACAAAAGATACTACTGAAAATAACAAAGTTGATGTAAGAAA  
GTATTTGATAAATGAAAAGGAAACCCATTTACTAATATACTAATACATGCGTATAAAGAACATAATGGAACAAACT  
TAATAGAAAGTAAAACTACGCAATAGGATCAGACATTCCAGAAAAATGTGATACCTTAGCTTCCAATTGCTTTTTA

```

AGTGGTAATTTTAAACATTGAAAAATGCTTTCAATGTGCTCTTTTAGTAAAAA-----
-----AAAAAAAAAAAAAAAAAACATGTC-----GGCCG-----CCTCGGCCT-----
-----CTC-----GA-----T-----
-----CTAGAGGGTGGGCATC-GAT----A-----CGGGAT----CCATC-----GAGCTC-----
-----GAGCTGCAG-----ATGA---ATCGT-----
AGATACTGAA--AAA--CCCC-GCA---AGT-----T-----CACTT-----CAACT-----
GTGC-----ATCGTGCACC-----ATCT-CAATTT-----
CTTTCATTTATACAT-----CGTTTTG-C---C---TTCT---TTTATGTAACTA-----TA-----
-----CTCC-----TCTA-----AGT-----TTC-----AATC--TTGGCCATG-----T-----AAC-----
--CTCTG---ATCTATAGAATTTTTTAAATGACTAGAAT---TAATGCCCATCTTT-----
TTT-----TTGGAACTAAAT-----TC---TT-CA-----TGAAA-----
-----AT-----TATT-----
TACGA-----GG-----GC-----TTATT-CAAAGC-----TTTGGACT--TCTTCG-----CCA-----
AAGGTTG-----GG--CAAGT--CCC-----AATCAAGG-----TT-----GCCGC-----TT-----GCTACTT---
-----GCC-----A-----AAATTACAAAAAAT--GGGAA-----A---GGCA-AATC---
--GTG---GGAAACC-----TTTTGA-CC-----TCCAA-----AACC-----G-----
-----ATTCCTTAGT-----TTA-----G-----TTTA-----TATTAA-----AAATTTA-----
-----AAAAATA---GGGACTTTATTAGGCC--TTGGATACAAA-----AC

```

**Proteins**

>PF3D7\_0207600\_SERA5

```

MKSYSISLFFILCVIFNKNVIKCTGESQTGNTGGGQAGNTGGDQAGSTGGSPQGSGTASPOGSGTASPOGSGTASQPGS
SEPSNPVSSGHSVSTVSVSQTSTSSEKQDTIQVKSALLKDYMGLKVTGPCNENFIMFLVPHIYIDVDTEDTNIELRRTLKKT
NNAISFESNSGSLEKKKYVKLPSNGTTGEQGSSTGTVRGDTEPISDSSSSSSSSSSSSSSSSSSSSSSSSELPANGPDSPT
VKPPRNLQNICETGKNFKLVVYIKENTLILKWKVYGETKDTTENNKVDVRKYLINEKETPFTNILIHAYKEHNGTNLIESKNY
AIGSDIPEKCDTLASNCFLSGNFNIEKCFQCALLVEKENKNDVCYKYLSEDIVSKFKEIKAETEDDEDDDYTEYKLTESIDNIL
VKMFKTNENNDKSELIKLEEVDLSKLELMNYCSLLKDVDTTGTLDNYGMGNEMDIFNNLKRLLIYHSEENINTLKNKFR
NAAVCLKNVDDWIVNKRGLVPELNYDLEYFNEHLYNDKNSPEDKDNKGGKGVVHVDTTLEKEDTLYSDNSDNMFCNK
EYCNRLKDENNCISNLQVEDQGNCDSWIFASKYHLETIRCMKGYEPTKISALYVANCYKGEHKDRCEGSSPMEFLQII
EDYGFLPAESNYPYVVKVGEQCPKVEDHWMNLWDNGKILHNKNEPNSLDGKGYTAYESERFHDNMDAFVKIITEV
MKNKGSVIAYIKAENVMGYEFGKVKVQLCGDDTADHAVNIVGYGNYVNSEGEKKSYPWIVRNSWGPYWGDEGYFKVD
MYGPTHCHFNIHVSIVFVNDLPMNNTTKKESKIYDYLLKASPEFYHNLVYKFNFNKLVGKKNLFSEKEDNENKGLGNNYII
FGQDTAGSQSGKESNTALESAGTSNEVSEVHVYHILKHIKDGKIRMGMRKYIDTQDVNKKHSCTRSYAFNPENYEK
VNLNVNWKTCCEKTSPGLCLSKLDTNNECYFCYV

```

>Recomb\_prot\_SERA5

```

MGSSH-----
---
HHHHSQDPDTEDTNIELRRTLKKTNNAISFESNSGSLEKKKYVKLPSNGTTGEQGSSTGTVRGDTEPISDSSSSSSSSSSSS
SSSSSSSSSSSSSELPANGPDSPTVKPPRNLQNICETGKNFKLVVYIKENTLILKWKVYGETKDTTENNKVDVRKYLINEK
ETPFTNILIHAYKEHNGTNLIESKNYAIGSDIPEKCDTLASNCFLSGNFNIEKCFQCALLV-----

```

-----  
-----  
-----  
-----  
-----

>Y2H\_clone3457

-----  
-----

DTEDTNIELRTTLKKTNNAISFESNSGSLEKKKYVKLPSNGTTGEQGSSTGTVRGDTEPISDSSSSSSSSSSSSSSSSSSSSSSSS  
SSSES LPANGPDSPTVKPPRNLQNICETGKNFKLVVYIKENTLILKWKVYGETKDTTENNKVDVRKYLINEKETPFTNILIH  
AYKEHNGTNLIESKNYAIGSDIPEKCDTLASNCFLSGNFNIEKCFQCALLV-----

-----  
-----  
-----  
-----  
-----

## References

- 1 Letunic, I. & Bork, P. 20 years of the SMART protein domain annotation resource. *Nucleic Acids Res.* **46**, D493-D496, doi:10.1093/nar/gkx922 (2018).
- 2 Finn, R. D. *et al.* InterPro in 2017-beyond protein family and domain annotations. *Nucleic Acids Res.* **45**, D190-D199, doi:10.1093/nar/gkw1107 (2017).
- 3 Dawson, N. L. *et al.* CATH: an expanded resource to predict protein function through structure and sequence. *Nucleic Acids Res.* **45**, D289-D295, doi:10.1093/nar/gkw1098 (2017).
- 4 de Castro, E. *et al.* ScanProsite: detection of PROSITE signature matches and ProRule-associated functional and structural residues in proteins. *Nucleic Acids Res.* **34**, W362-365, doi:10.1093/nar/gkl124 (2006).
- 5 Kelley, L. A., Mezulis, S., Yates, C. M., Wass, M. N. & Sternberg, M. J. The Phyre2 web portal for protein modeling, prediction and analysis. *Nat. Protoc.* **10**, 845-858, doi:10.1038/nprot.2015.053 (2015).
- 6 Kallberg, M. *et al.* Template-based protein structure modeling using the RaptorX web server. *Nat. Protoc.* **7**, 1511-1522, doi:10.1038/nprot.2012.085 (2012).
- 7 The UniProt, C. UniProt: the universal protein knowledgebase. *Nucleic Acids Res.* **45**, D158-D169, doi:10.1093/nar/gkw1099 (2017).
- 8 Katoh, K. & Standley, D. M. MAFFT multiple sequence alignment software version 7: improvements in performance and usability. *Mol. Biol. Evol.* **30**, 772-780, doi:10.1093/molbev/mst010 (2013).
- 9 Felsenstein, J. Confidence Limits on Phylogenies: An Approach Using the Bootstrap. *Evolution* **39**, 783-791, doi:10.1111/j.1558-5646.1985.tb00420.x (1985).
- 10 Jones, D. T., Taylor, W. R. & Thornton, J. M. The rapid generation of mutation data matrices from protein sequences. *Comput. Appl. Biosci.* **8**, 275-282 (1992).
- 11 Tamura, K., Stecher, G., Peterson, D., Filipski, A. & Kumar, S. MEGA6: Molecular Evolutionary Genetics Analysis version 6.0. *Mol. Biol. Evol.* **30**, 2725-2729, doi:10.1093/molbev/mst197 (2013).
- 12 Pettersen, E. F. *et al.* UCSF Chimera--a visualization system for exploratory research and analysis. *J. Comput. Chem.* **25**, 1605-1612, doi:10.1002/jcc.20084 (2004).
- 13 Crooks, G. E., Hon, G., Chandonia, J. M. & Brenner, S. E. WebLogo: a sequence logo generator. *Genome Res.* **14**, 1188-1190, doi:10.1101/gr.849004 (2004).
- 14 Aurrecochea, C. *et al.* PlasmoDB: a functional genomic database for malaria parasites. *Nucleic Acids Res.* **37**, D539-543, doi:10.1093/nar/gkn814 (2009).
- 15 Philip, N. & Waters, A. P. Conditional degradation of *Plasmodium* calcineurin reveals functions in parasite colonization of both host and vector. *Cell Host Microbe* **18**, 122-131, doi:10.1016/j.chom.2015.05.018 (2015).
- 16 Bushell, E. *et al.* Functional profiling of a *Plasmodium* genome reveals an abundance of essential genes. *Cell* **170**, 260-272 e268, doi:10.1016/j.cell.2017.06.030 (2017).
- 17 Anderluh, G., Pungercar, J., Strukelj, B., Macek, P. & Gubensek, F. Cloning, sequencing, and expression of equinatoxin II. *Biochem. Biophys. Res. Commun.* **220**, 437-442, doi:10.1006/bbrc.1996.0391 (1996).
